# Supplementary material
Source: MDPI journal article supplement (https://www.mdpi.com/2071-1050/10/7/2522)
Supplement: s1 [file s1]

## Sheet: MAIN
	Content
	Equations and parameters
	Table S5			Ranges of calculated factors and comparison with those reported by Owsianiak et al. [15]
	Figure S1			Calcium carbonate content (%) in topsoil
	Figure S2-S6			Log10-transformed values of some factors calculated in this study
	Figures S7-S8			Influence of organic carbon content and pH of soils on CFs
	Table S6 - CF_ERM			CFs for copper terrestrial ecotoxicity derived from the method based on empirical regression models
	Table S7 - CF_WHAM			CFs for copper terrestrial ecotoxicity derived from the method based on WHAM 6.0
	Table S8			Description of columns headers of tables S6 and S7
	Shapefiles			Link to download the shapefiles containing the CFs computed in this study.

## Sheet: Equations and Parameters
	Copper background concentration based on soil texture.
	Following the approach of Plouffe et al. [16], copper background concentration was assigned to every soil mapping unit of the HWSD according to soil texture class reported by Kabata-Pendias and Mukherjee [24]. The arithmetic means, indicated in parentheses, were selected (Table S1).
	This approach was applied in both methods to derive CFs.
	Table S1. Cu concentration (mg/kg) in soil according to Kabata-Pendias and Mukherjee [24]
	Soil texture	Cu concentration (mg/kg)
	Light sandy	1-70 (13)
	Medium loamy	4-100 (23)
	Heavy loamy	7-140 (24)
	Calcareous	7- 70 (23)
	Organic	1-115 (16)
	Table S2. Correspondence between soil texture repported in Kabata-Pendias and Mukherjee [24] and soil texture reported in the HWSD according to Plouffe et al. [16]
	Soil texture according to Kabata-Pendias (2010)		Soil texture in the HWSD
	Light sandy		Sandy clay loam, sandy loam, loamy sand, and sand
	Medium loamy		Clay loam, silt, silt loam, sandy clay, and loam
	Heavy loamy		Clay (heavy), silty clay, clay, and silty clay loam
	Calcareous
	Organic		Histosols (when soil texture is not available)
			Organic matter content (OM) > 30 %
			20% <= OM <= 30 % AND Clay content < 22%
	Volumetric water content (L/L) based on soil texture
	We used data on available water capacity according to soil texture, as reported in the site Northeast Region Certified Crop Adviser (NRCCA) of Cornell University, in line with the study of Plouffe et al. (2015).
	Table S3. Available water capacity according to soil texture (Cornell University, 2010)
	Soil type	Fraction (%)
	Loamy sand	0.17
	Sandy loam	0.2
	Sandy clay loam	0.16
	Loam	0.32
	Silt loam	0.35
	Silty clay loam	0.2
	Clay loam	0.18
	Silty clay	0.22
	Clay	0.2
	Peat	0.5
	Sandy clay	0.125
	Sand	0.1
	Sum of amorphous Fe and Al(Hydr)Oxides (mmol/kg)
	This parameter was required for the calculation of total dissolved metal from reactive metal and was considered constant and equivalent to the value reported by Owsianiak et al [15].
	Organic matter content (OM - %)
	Following Plouffe et al. [16], we considered that organic matter contains 58% of organic carbon; which implies:
													(Equation S1)
	Dissolved organic carbon (DOC - mg/L)
	Dissolved organic carbon was calculated with a regression model, which recorrelation coefficient is 0.68; according to Römkens et al. [25].
													(Equation S2)
	Activity coefficient for cations
	Activity coefficients were used to transform cations activities into concentrations. These coefficients were computed with the modified Debye-Hückel equation, as reported by Owsianiak et al [15].
													(Equation S3)
	Reactive copper concentration (mg/kg)
	Reactive metal concentration is calculated from an equation reported by Römkens et al. [25] .
													(Equation S4)
	The units of Cureactive and Cutotal are mg/kg, and % for OM and CLAY.
	Total dissolved metal concentration (mol/L)
	Total dissolved metal concentration was calculated with an equation reported by Groenenberg et al. [21], in accordance with the study of Owsianiak et al [15] .
													(Equation S5)
	The units of Cureactive are mol/kg, % for OM and CLAY, mmol/kg for FeAlox and mg/L for DOC.
	Free ion activity from reactive metal (mol/L)
	The free ion activity was calculated with an equation reported by Groenenberg et al. [21].
													(Equation S6)
	The units for Cufree are mol/L, mol/kg for reactive metal, and % for OM.
	Partitioning coefficients (Kd - L/kg)
	Kd corresponds to the ratio of metal concentration in the solid phase over the concentration of solubilized metal.
													(Equation S7)
	EC50 from terrestrial biotic ligand models (TBLM)
	We used the TBLM repported by Thakali et al. [28] to calculate EC50 activities for six endpoints by applying the following equation:
													(Equation S8)
	f50 is the fraction of the total biotic ligand (BL) sites occupied by the metal, which translates into a 50% effect level. For the six available biological enpoints, f50 takes the value of 0.05.
	Table S4. Parameters and biological enpoints used ofr the TBLM for copper ecotoxicity modelling.
	Biological endpoint		log10 KCuBL		log10 KHBL		log10 KMgBL
	Barley root elongation (BRE)		7.41 (0.23)		6.48 (0.26)		-
	Tomato shoot yield (TSY)		5.65 (0.10)		4.38 (0.21)		-
	F. candida juvenile production (FJP)		4.62 (0.12)		2.97 (0.62)		-
	E. Fetida cocoon production (ECP)		6.50 (0.25)		5.90 (0.29)		-
	Glucose induced respiration (GIR)		6.69 (0.10)		7.5		-
	Potential nitrification rate (PNR)		4.93 (0.48)		4.45 (0.58)		1.64 (5.80)
	References not included in the main text
	Cornell University (2010). Competency Area 2: Soil hydrology AEM. http://nrcca.cals.cornell.edu/soil/CA2/CA0212.1-3.php. 2014

## Sheet: Table S5
	Table S5. Ranges of calculated factors and comparison with those reported by Owsianiak et al. [15]
	Method:	WHAM			Regression Models			Owsianiak et al. [15]
	Parameter\Percentiles	2.5th	50th	97.5th	2.5th	50th	97.5th	2.5th	50th	97.5th
	log10(Kd) [L/kg]	0.48	2.6	2.99	2.64	3.1	3.34	2.47712	2.95904	3.39794
	log10(FFsoil,air) [day]	-	-	-	-	-	-	4.14613	4.59106	4.95904
	log10(FFsoil,soil) [day]	2.52	4.46	5.23	4.52	5.18	5.58	-	-	-
	log10(ACF) [kgreactive/kgtotal]	-	-	-	-0.41	-0.34	-0.25	-0.455932	-0.376751	-0.187087
	log10(BF) [kgfree/kgreactive]	-	-	-	-6.54	-5.34	-4.27	-6.76955	-5.63827	-4.31876
	log10(BF) [kgfree/kgtotal]	-9.43	-5.51	-3.75	-	-	-	-	-	-
	log10(EF) [PAF.m3/kgfree]	4.01	4.88	5.6	4.01	4.87	5.6	3.80618	4.64345	4.89209
	log10(CF) [PAF.m3.day/kgtotal]	-0.06	3.23	5.44	2.78	4.27	5.16	2.23045	3.14613	4.30103
	CFglobal [PAF.m3.day/kgtotal]	32707.8			32696.4			-
	Database	HWSD			HWSD			ISRIC-WISE3
	Number of soil mapping units	7907			7841			760

## Sheet: Figures S2-S6
	In the above figures, black dots correspond to 2.5th and 97.th percentiles of the values. Boxes and bars correspond to 5th, 25th, 50th, 75th, and 95th percentiles.
	* Note: the bioavailability factors of empirical regressions models in Figure S4 correspond to the multiplication of ACF and BFERM.

## Sheet: Table S6 - CF_ERM
MU_GLOBAL	SAND	SILT	CLAY	REF_BULK_DENSITY	OC	PH_H2O	CEC_SOIL	BS	ECE	TEXTURE_CLASS	THETA_W	CU_CONC	OM	LOG10_DOC	Free ion activity (M): H	Ionic strength (M)	Free ion activity (M): Mg	F_DI	F_MONO	LOG10_CU_REAC	LOG10_CU_DISS	LOG10_CU_FREE	Kd	BRE_EPT	TSY_EPT	FJP_EPT	ECP_EPT	GIR_EPT	PNR_EPT	GMEAN_EC50_KG	EF	ACF	BF_ERM	FF	CF
2	78	12	10	1.58	0.61	6.2	4	72	0.1	sandy loam	0.2	13	1.0492	1.00123	6.30957e-07	0.01159	1.56676e-10	0.64279	0.8954	0.781742	-6.9077	-8.99585	1654.06	5.94924e-09	1.19611e-07	1.26329e-06	2.49851e-08	2.25157e-07	6.29363e-07	2.398e-06	208507	0.465371	1.34235e-06	267724	34871.6
37	60	14	26	1.41	1.06	5	6	38	0.1	sandy clay loam	0.16	13	1.8232	1.38041	1e-05	0.0097157	1.11868e-07	0.66407	0.902721	0.716301	-6.7146	-8.06244	1060.37	6.38843e-08	1.46092e-07	1.27433e-06	1.48848e-07	3.40893e-06	7.9265e-07	6.28471e-06	79558.2	0.400275	1.20018e-05	186345	71221.2
38	60	14	26	1.41	1.06	5	6	38	0.1	sandy clay loam	0.16	13	1.8232	1.38041	1e-05	0.0097157	1.11868e-07	0.66407	0.902721	0.716301	-6.7146	-8.06244	1060.37	6.38843e-08	1.46092e-07	1.27433e-06	1.48848e-07	3.40893e-06	7.9265e-07	6.28471e-06	79558.2	0.400275	1.20018e-05	186345	71221.2
39	28	20	52	1.24	1.65	4.9	9	24	0.1	clay (light)	0.2	24	2.838	1.5377	1.25893e-05	0.022	8.40027e-10	0.561029	0.865459	0.975986	-6.48834	-7.92313	1162.69	7.98957e-08	1.53411e-07	1.27738e-06	1.8308e-07	4.28882e-06	8.37773e-07	1.05665e-05	47319.1	0.394253	1.29293e-05	201351	48567.1
41	77	9	14	1.53	0.58	4.8	3	36	0.1	sandy loam	0.2	13	0.9976	1.22324	1.58489e-05	0.000144057	2.84931e-07	0.9458	0.986165	0.756251	-6.74147	-7.59701	1128.04	1.00052e-07	1.62624e-07	1.28122e-06	2.26173e-07	5.39649e-06	8.94589e-07	7.15353e-06	69895.5	0.438841	3.6827e-05	196319	221761
44	60	14	26	1.41	1.06	5	6	38	0.1	sandy clay loam	0.16	13	1.8232	1.38041	1e-05	0.0097157	1.11868e-07	0.66407	0.902721	0.716301	-6.7146	-8.06244	1060.37	6.38843e-08	1.46092e-07	1.27433e-06	1.48848e-07	3.40893e-06	7.9265e-07	6.28471e-06	79558.2	0.400275	1.20018e-05	186345	71221.2
45	57	15	28	1.39	0.98	4.7	5	44	0.1	sandy clay loam	0.16	13	1.6856	1.40653	1.99526e-05	0.0033835	8.95818e-08	0.775353	0.938372	0.710014	-6.68819	-7.7372	997.814	1.25428e-07	1.74223e-07	1.28605e-06	2.80426e-07	6.791e-06	9.66103e-07	8.00383e-06	62470.1	0.394522	2.61203e-05	176952	113913
47	57	15	28	1.39	0.98	4.7	5	44	0.1	sandy clay loam	0.16	13	1.6856	1.40653	1.99526e-05	0.0033835	8.95818e-08	0.775353	0.938372	0.710014	-6.68819	-7.7372	997.814	1.25428e-07	1.74223e-07	1.28605e-06	2.80426e-07	6.791e-06	9.66103e-07	8.00383e-06	62470.1	0.394522	2.61203e-05	176952	113913
50	62	12	26	1.41	0.68	5.4	5	75	0.1	sandy clay loam	0.16	13	1.1696	1.17167	3.98107e-06	0.00848936	3.83237e-07	0.679888	0.908049	0.711867	-6.82818	-8.29444	1377.33	2.66652e-08	1.2908e-07	1.26723e-06	6.92751e-08	1.36359e-06	6.87759e-07	3.83263e-06	130459	0.396209	7.10689e-06	231452	85023.1
51	62	12	26	1.41	0.68	5.4	5	75	0.1	sandy clay loam	0.16	13	1.1696	1.17167	3.98107e-06	0.00848936	3.83237e-07	0.679888	0.908049	0.711867	-6.82818	-8.29444	1377.33	2.66652e-08	1.2908e-07	1.26723e-06	6.92751e-08	1.36359e-06	6.87759e-07	3.83263e-06	130459	0.396209	7.10689e-06	231452	85023.1
52	40	39	21	1.4	1.25	5.1	11	47	0.1	loam	0.32	23	2.15	1.41568	7.94328e-06	0.03492	2.48837e-05	0.500038	0.840913	1.01926	-6.52501	-7.98077	1212.42	5.11662e-08	1.40279e-07	1.2719e-06	1.21657e-07	2.71002e-06	7.57474e-07	1.47532e-05	33891	0.454495	1.45238e-05	208487	46641.4
53	40	39	21	1.4	1.25	5.1	11	47	0.1	loam	0.32	23	2.15	1.41568	7.94328e-06	0.03492	2.48837e-05	0.500038	0.840913	1.01926	-6.52501	-7.98077	1212.42	5.11662e-08	1.40279e-07	1.2719e-06	1.21657e-07	2.71002e-06	7.57474e-07	1.47532e-05	33891	0.454495	1.45238e-05	208487	46641.4
55	37	40	23	1.38	1.07	6.2	13	88	0.1	loam	0.32	23	1.8404	1.17939	6.30957e-07	0.08447	0.000241459	0.389683	0.790092	1.01095	-6.69776	-9.02741	1804.69	5.94924e-09	1.19611e-07	1.26329e-06	2.49851e-08	2.25157e-07	6.35881e-07	6.33976e-06	78867.4	0.445882	1.34898e-06	286368	13584.6
132	56	20	24	1.41	0.74	6.3	7	85	0.1	sandy clay loam	0.16	13	1.2728	1.04547	5.01187e-07	0.03195	3.25636e-06	0.511765	0.8458	0.718656	-6.93409	-9.22163	1757.68	5.14678e-09	1.19244e-07	1.26313e-06	2.32695e-08	1.81058e-07	6.2719e-07	2.23894e-06	223320	0.402451	8.27383e-07	280629	20867.9
135	79	11	10	1.59	0.53	6.3	4	76	0.1	sandy loam	0.2	13	0.9116	0.939657	5.01187e-07	0.01286	7.86541e-09	0.629954	0.890896	0.780338	-6.94008	-9.04265	1782.13	5.14678e-09	1.19244e-07	1.26313e-06	2.32695e-08	1.81058e-07	6.27102e-07	2.27355e-06	219921	0.463869	1.20152e-06	283623	34764.2
136	79	11	10	1.59	0.53	6.3	4	76	0.1	sandy loam	0.2	13	0.9116	0.939657	5.01187e-07	0.01286	7.86541e-09	0.629954	0.890896	0.780338	-6.94008	-9.04265	1782.13	5.14678e-09	1.19244e-07	1.26313e-06	2.32695e-08	1.81058e-07	6.27102e-07	2.27355e-06	219921	0.463869	1.20152e-06	283623	34764.2
138	79	11	10	1.59	0.53	6.3	4	76	0.1	sandy loam	0.2	13	0.9116	0.939657	5.01187e-07	0.01286	7.86541e-09	0.629954	0.890896	0.780338	-6.94008	-9.04265	1782.13	5.14678e-09	1.19244e-07	1.26313e-06	2.32695e-08	1.81058e-07	6.27102e-07	2.27355e-06	219921	0.463869	1.20152e-06	283623	34764.2
139	80	10	10	1.59	0.6	6.2	6	83	0.1	sandy loam	0.2	13	1.032	0.995986	6.30957e-07	0.02889	6.45133e-05	0.525075	0.851247	0.781577	-6.90993	-8.9896	1662.57	5.94924e-09	1.19611e-07	1.26329e-06	2.49851e-08	2.25157e-07	6.31105e-07	2.93695e-06	170244	0.465194	1.35377e-06	268798	28818.9
142	80	10	10	1.59	0.6	6.2	6	83	0.1	sandy loam	0.2	13	1.032	0.995986	6.30957e-07	0.02889	6.45133e-05	0.525075	0.851247	0.781577	-6.90993	-8.9896	1662.57	5.94924e-09	1.19611e-07	1.26329e-06	2.49851e-08	2.25157e-07	6.31105e-07	2.93695e-06	170244	0.465194	1.35377e-06	268798	28818.9
143	80	10	10	1.59	0.6	6.2	6	83	0.1	sandy loam	0.2	13	1.032	0.995986	6.30957e-07	0.02889	6.45133e-05	0.525075	0.851247	0.781577	-6.90993	-8.9896	1662.57	5.94924e-09	1.19611e-07	1.26329e-06	2.49851e-08	2.25157e-07	6.31105e-07	2.93695e-06	170244	0.465194	1.35377e-06	268798	28818.9
144	80	10	10	1.59	0.6	6.2	6	83	0.1	sandy loam	0.2	13	1.032	0.995986	6.30957e-07	0.02889	6.45133e-05	0.525075	0.851247	0.781577	-6.90993	-8.9896	1662.57	5.94924e-09	1.19611e-07	1.26329e-06	2.49851e-08	2.25157e-07	6.31105e-07	2.93695e-06	170244	0.465194	1.35377e-06	268798	28818.9
145	80	10	10	1.59	0.6	6.2	6	83	0.1	sandy loam	0.2	13	1.032	0.995986	6.30957e-07	0.02889	6.45133e-05	0.525075	0.851247	0.781577	-6.90993	-8.9896	1662.57	5.94924e-09	1.19611e-07	1.26329e-06	2.49851e-08	2.25157e-07	6.31105e-07	2.93695e-06	170244	0.465194	1.35377e-06	268798	28818.9
146	80	10	10	1.59	0.6	6.2	6	83	0.1	sandy loam	0.2	13	1.032	0.995986	6.30957e-07	0.02889	6.45133e-05	0.525075	0.851247	0.781577	-6.90993	-8.9896	1662.57	5.94924e-09	1.19611e-07	1.26329e-06	2.49851e-08	2.25157e-07	6.31105e-07	2.93695e-06	170244	0.465194	1.35377e-06	268798	28818.9
153	44	33	23	1.39	0.99	4.9	9	51	0.1	loam	0.32	23	1.7028	1.37575	1.25893e-05	0.02294	0.000113525	0.555529	0.86333	1.01017	-6.53365	-7.698	1236.78	7.98957e-08	1.53411e-07	1.27738e-06	1.8308e-07	4.28882e-06	8.40837e-07	1.70843e-05	29266.7	0.445086	2.86453e-05	211946	79085.5
161	49	28	23	1.4	0.58	6.2	9	81	0.1	loam	0.32	23	0.9976	0.985238	6.30957e-07	0.05378	0.000187204	0.444128	0.816351	1.00483	-6.78034	-8.79566	2182.64	5.94924e-09	1.19611e-07	1.26329e-06	2.49851e-08	2.25157e-07	6.34417e-07	5.56044e-06	89920.9	0.439646	2.29943e-06	330078	30005.5
164	49	28	23	1.4	0.58	6.2	9	81	0.1	loam	0.32	23	0.9976	0.985238	6.30957e-07	0.05378	0.000187204	0.444128	0.816351	1.00483	-6.78034	-8.79566	2182.64	5.94924e-09	1.19611e-07	1.26329e-06	2.49851e-08	2.25157e-07	6.34417e-07	5.56044e-06	89920.9	0.439646	2.29943e-06	330078	30005.5
165	89	6	5	1.7	0.4	6.4	3	100	0.1	sand	0.1	13	0.688	0.83344	3.98107e-07	0.0081224	4.87455e-06	0.684976	0.909743	0.829003	-6.96058	-8.99446	1868.24	4.50937e-09	1.18953e-07	1.26301e-06	2.19067e-08	1.4603e-07	6.25437e-07	9.75955e-07	512319	0.518872	5.61272e-07	294016	43867.7
168	89	6	5	1.7	0.4	6.4	3	100	0.1	sand	0.1	13	0.688	0.83344	3.98107e-07	0.0081224	4.87455e-06	0.684976	0.909743	0.829003	-6.96058	-8.99446	1868.24	4.50937e-09	1.18953e-07	1.26301e-06	2.19067e-08	1.4603e-07	6.25437e-07	9.75955e-07	512319	0.518872	5.61272e-07	294016	43867.7
169	89	6	5	1.7	0.4	6.4	3	100	0.1	sand	0.1	13	0.688	0.83344	3.98107e-07	0.0081224	4.87455e-06	0.684976	0.909743	0.829003	-6.96058	-8.99446	1868.24	4.50937e-09	1.18953e-07	1.26301e-06	2.19067e-08	1.4603e-07	6.25437e-07	9.75955e-07	512319	0.518872	5.61272e-07	294016	43867.7
171	89	6	5	1.7	0.4	6.4	3	100	0.1	sand	0.1	13	0.688	0.83344	3.98107e-07	0.0081224	4.87455e-06	0.684976	0.909743	0.829003	-6.96058	-8.99446	1868.24	4.50937e-09	1.18953e-07	1.26301e-06	2.19067e-08	1.4603e-07	6.25437e-07	9.75955e-07	512319	0.518872	5.61272e-07	294016	43867.7
172	89	6	5	1.7	0.4	6.4	3	100	0.1	sand	0.1	13	0.688	0.83344	3.98107e-07	0.0081224	4.87455e-06	0.684976	0.909743	0.829003	-6.96058	-8.99446	1868.24	4.50937e-09	1.18953e-07	1.26301e-06	2.19067e-08	1.4603e-07	6.25437e-07	9.75955e-07	512319	0.518872	5.61272e-07	294016	43867.7
173	89	6	5	1.7	0.4	6.4	3	100	0.1	sand	0.1	13	0.688	0.83344	3.98107e-07	0.0081224	4.87455e-06	0.684976	0.909743	0.829003	-6.96058	-8.99446	1868.24	4.50937e-09	1.18953e-07	1.26301e-06	2.19067e-08	1.4603e-07	6.25437e-07	9.75955e-07	512319	0.518872	5.61272e-07	294016	43867.7
181	89	6	5	1.7	0.4	6.4	3	100	0.1	sand	0.1	13	0.688	0.83344	3.98107e-07	0.0081224	4.87455e-06	0.684976	0.909743	0.829003	-6.96058	-8.99446	1868.24	4.50937e-09	1.18953e-07	1.26301e-06	2.19067e-08	1.4603e-07	6.25437e-07	9.75955e-07	512319	0.518872	5.61272e-07	294016	43867.7
185	89	5	6	1.68	0.4	5.6	2	71	0.1	sand	0.1	13	0.688	0.96944	2.51189e-06	6.03449e-05	2.25338e-08	0.964385	0.990975	0.815463	-6.86126	-8.20543	1486.33	1.75803e-08	1.24927e-07	1.2655e-06	4.98519e-08	8.64331e-07	6.62145e-07	1.36578e-06	366091	0.502944	3.60484e-06	246065	163322
186	89	5	6	1.68	0.4	5.6	2	71	0.1	sand	0.1	13	0.688	0.96944	2.51189e-06	6.03449e-05	2.25338e-08	0.964385	0.990975	0.815463	-6.86126	-8.20543	1486.33	1.75803e-08	1.24927e-07	1.2655e-06	4.98519e-08	8.64331e-07	6.62145e-07	1.36578e-06	366091	0.502944	3.60484e-06	246065	163322
187	89	5	6	1.68	0.4	5.6	2	71	0.1	sand	0.1	13	0.688	0.96944	2.51189e-06	6.03449e-05	2.25338e-08	0.964385	0.990975	0.815463	-6.86126	-8.20543	1486.33	1.75803e-08	1.24927e-07	1.2655e-06	4.98519e-08	8.64331e-07	6.62145e-07	1.36578e-06	366091	0.502944	3.60484e-06	246065	163322
190	90	5	5	1.71	0.35	5.7	2	80	0.1	sand	0.1	13	0.602	0.910105	0.01119	0.000101203	1.99526e-06	0.954255	0.988362	0.82767	-6.88457	-8.24393	1568.3	6.91973e-05	3.17462e-05	1.44474e-05	0.000147954	0.00380257	0.000195637	0.000820278	609.549	0.517281	3.15132e-06	256771	255.137
191	90	5	5	1.71	0.35	5.7	2	80	0.1	sand	0.1	13	0.602	0.910105	0.01119	0.000101203	1.99526e-06	0.954255	0.988362	0.82767	-6.88457	-8.24393	1568.3	6.91973e-05	3.17462e-05	1.44474e-05	0.000147954	0.00380257	0.000195637	0.000820278	609.549	0.517281	3.15132e-06	256771	255.137
192	90	5	5	1.71	0.35	5.7	2	80	0.1	sand	0.1	13	0.602	0.910105	0.01119	0.000101203	1.99526e-06	0.954255	0.988362	0.82767	-6.88457	-8.24393	1568.3	6.91973e-05	3.17462e-05	1.44474e-05	0.000147954	0.00380257	0.000195637	0.000820278	609.549	0.517281	3.15132e-06	256771	255.137
224	42	37	21	1.4	1.37	5.1	11	22	0.1	loam	0.32	23	2.3564	1.44474	7.94328e-06	0.03455	2.07637e-06	0.501442	0.841502	1.02017	-6.51265	-8.01546	1178.39	5.11662e-08	1.40279e-07	1.2719e-06	1.21657e-07	2.71002e-06	7.56858e-07	1.47099e-05	33990.7	0.455454	1.33806e-05	203616	42178.4
225	42	37	21	1.4	1.37	5.1	11	22	0.1	loam	0.32	23	2.3564	1.44474	7.94328e-06	0.03455	2.07637e-06	0.501442	0.841502	1.02017	-6.51265	-8.01546	1178.39	5.11662e-08	1.40279e-07	1.2719e-06	1.21657e-07	2.71002e-06	7.56858e-07	1.47099e-05	33990.7	0.455454	1.33806e-05	203616	42178.4
232	83	11	6	1.67	0.5	6.6	5	94	0.1	loamy sand	0.17	13	0.86	0.870184	2.51189e-07	0.02764	2.14133e-05	0.530925	0.853608	0.817692	-6.96547	-9.28987	1889.41	3.60088e-09	1.18537e-07	1.26284e-06	1.99644e-08	9.61045e-08	6.23323e-07	1.89114e-06	264390	0.505532	5.04957e-07	296536	20013.6
233	83	11	6	1.67	0.5	6.6	5	94	0.1	loamy sand	0.17	13	0.86	0.870184	2.51189e-07	0.02764	2.14133e-05	0.530925	0.853608	0.817692	-6.96547	-9.28987	1889.41	3.60088e-09	1.18537e-07	1.26284e-06	1.99644e-08	9.61045e-08	6.23323e-07	1.89114e-06	264390	0.505532	5.04957e-07	296536	20013.6
238	83	11	6	1.67	0.5	6.6	5	94	0.1	loamy sand	0.17	13	0.86	0.870184	2.51189e-07	0.02764	2.14133e-05	0.530925	0.853608	0.817692	-6.96547	-9.28987	1889.41	3.60088e-09	1.18537e-07	1.26284e-06	1.99644e-08	9.61045e-08	6.23323e-07	1.89114e-06	264390	0.505532	5.04957e-07	296536	20013.6
242	47	34	19	1.43	0.97	6.4	12	79	0.1	loam	0.32	23	1.6684	1.11428	3.98107e-07	0.07639	9.23319e-05	0.401294	0.795913	1.02416	-6.72934	-9.17878	1940.8	4.50937e-09	1.18953e-07	1.26301e-06	2.19067e-08	1.4603e-07	6.27798e-07	5.33415e-06	93735.7	0.459651	8.91177e-07	302597	11618.8
243	47	34	19	1.43	0.97	6.4	12	79	0.1	loam	0.32	23	1.6684	1.11428	3.98107e-07	0.07639	9.23319e-05	0.401294	0.795913	1.02416	-6.72934	-9.17878	1940.8	4.50937e-09	1.18953e-07	1.26301e-06	2.19067e-08	1.4603e-07	6.27798e-07	5.33415e-06	93735.7	0.459651	8.91177e-07	302597	11618.8
423	53	22	25	1.4	0.98	5.1	6	49	0.1	sandy clay loam	0.16	13	1.6856	1.33853	7.94328e-06	0.00980092	2.2481e-07	0.663032	0.902368	0.71843	-6.73686	-8.13038	1116.14	5.11662e-08	1.40279e-07	1.2719e-06	1.21657e-07	2.71002e-06	7.56808e-07	5.56239e-06	89889.5	0.402242	1.02864e-05	104188	38750.7
424	78	12	10	1.58	0.61	6.2	4	72	0.1	sandy loam	0.2	13	1.0492	1.00123	6.30957e-07	0.01159	1.56676e-10	0.64279	0.8954	0.781742	-6.9077	-8.99585	1654.06	5.94924e-09	1.19611e-07	1.26329e-06	2.49851e-08	2.25157e-07	6.29363e-07	2.398e-06	208507	0.465371	1.34235e-06	148276	19313.3
436	49	27	24	1.4	1	4.6	7	44	0.1	sandy clay loam	0.16	13	1.72	1.42994	2.51189e-05	0.0091147	2.11533e-05	0.671608	0.905272	0.721664	-6.66517	-7.63557	946.295	1.57375e-07	1.88826e-07	1.29214e-06	3.48727e-07	8.5466e-06	1.05671e-06	1.06459e-05	46966.4	0.405248	3.19038e-05	169085	102673
437	49	27	24	1.4	1	4.6	7	44	0.1	sandy clay loam	0.16	13	1.72	1.42994	2.51189e-05	0.0091147	2.11533e-05	0.671608	0.905272	0.721664	-6.66517	-7.63557	946.295	1.57375e-07	1.88826e-07	1.29214e-06	3.48727e-07	8.5466e-06	1.05671e-06	1.06459e-05	46966.4	0.405248	3.19038e-05	169085	102673
463	52	25	23	1.41	0.95	4.7	6	39	0.1	sandy clay loam	0.16	13	1.634	1.39667	1.99526e-05	0.00613307	2.9035e-06	0.716192	0.919936	0.724312	-6.68362	-7.7136	987.363	1.25428e-07	1.74223e-07	1.28605e-06	2.80426e-07	6.791e-06	9.66178e-07	8.6651e-06	57702.8	0.407726	2.63072e-05	93088.3	57614.8
464	52	25	23	1.41	0.95	4.7	6	39	0.1	sandy clay loam	0.16	13	1.634	1.39667	1.99526e-05	0.00613307	2.9035e-06	0.716192	0.919936	0.724312	-6.68362	-7.7136	987.363	1.25428e-07	1.74223e-07	1.28605e-06	2.80426e-07	6.791e-06	9.66178e-07	8.6651e-06	57702.8	0.407726	2.63072e-05	93088.3	57614.8
480	53	20	27	1.39	2.34	4.8	8	20	0.1	sandy clay loam	0.16	13	4.0248	1.66546	1.58489e-05	0.01715	3.29427e-11	0.59346	0.877703	0.721409	-6.58264	-8.16438	782.516	1.00052e-07	1.62624e-07	1.28122e-06	2.26173e-07	5.39649e-06	8.94581e-07	9.12049e-06	54821.6	0.40501	9.51485e-06	74968.1	15837.8
481	60	14	26	1.41	1.06	5	6	38	0.1	sandy clay loam	0.16	13	1.8232	1.38041	1e-05	0.0097157	1.11868e-07	0.66407	0.902721	0.716301	-6.7146	-8.06244	1060.37	6.38843e-08	1.46092e-07	1.27433e-06	1.48848e-07	3.40893e-06	7.9265e-07	6.28471e-06	79558.2	0.400275	1.20018e-05	186345	71221.2
482	60	14	26	1.41	1.06	5	6	38	0.1	sandy clay loam	0.16	13	1.8232	1.38041	1e-05	0.0097157	1.11868e-07	0.66407	0.902721	0.716301	-6.7146	-8.06244	1060.37	6.38843e-08	1.46092e-07	1.27433e-06	1.48848e-07	3.40893e-06	7.9265e-07	6.28471e-06	79558.2	0.400275	1.20018e-05	186345	71221.2
483	60	14	26	1.41	1.06	5	6	38	0.1	sandy clay loam	0.16	13	1.8232	1.38041	1e-05	0.0097157	1.11868e-07	0.66407	0.902721	0.716301	-6.7146	-8.06244	1060.37	6.38843e-08	1.46092e-07	1.27433e-06	1.48848e-07	3.40893e-06	7.9265e-07	6.28471e-06	79558.2	0.400275	1.20018e-05	186345	71221.2
485	77	9	14	1.53	0.58	4.8	3	36	0.1	sandy loam	0.2	13	0.9976	1.22324	1.58489e-05	0.000144057	2.84931e-07	0.9458	0.986165	0.756251	-6.74147	-7.59701	1128.04	1.00052e-07	1.62624e-07	1.28122e-06	2.26173e-07	5.39649e-06	8.94589e-07	7.15353e-06	69895.5	0.438841	3.6827e-05	196319	221761
488	60	14	26	1.41	1.06	5	6	38	0.1	sandy clay loam	0.16	13	1.8232	1.38041	1e-05	0.0097157	1.11868e-07	0.66407	0.902721	0.716301	-6.7146	-8.06244	1060.37	6.38843e-08	1.46092e-07	1.27433e-06	1.48848e-07	3.40893e-06	7.9265e-07	6.28471e-06	79558.2	0.400275	1.20018e-05	186345	71221.2
489	60	14	26	1.41	1.06	5	6	38	0.1	sandy clay loam	0.16	13	1.8232	1.38041	1e-05	0.0097157	1.11868e-07	0.66407	0.902721	0.716301	-6.7146	-8.06244	1060.37	6.38843e-08	1.46092e-07	1.27433e-06	1.48848e-07	3.40893e-06	7.9265e-07	6.28471e-06	79558.2	0.400275	1.20018e-05	186345	71221.2
490	60	14	26	1.41	1.06	5	6	38	0.1	sandy clay loam	0.16	13	1.8232	1.38041	1e-05	0.0097157	1.11868e-07	0.66407	0.902721	0.716301	-6.7146	-8.06244	1060.37	6.38843e-08	1.46092e-07	1.27433e-06	1.48848e-07	3.40893e-06	7.9265e-07	6.28471e-06	79558.2	0.400275	1.20018e-05	186345	71221.2
491	60	14	26	1.41	1.06	5	6	38	0.1	sandy clay loam	0.16	13	1.8232	1.38041	1e-05	0.0097157	1.11868e-07	0.66407	0.902721	0.716301	-6.7146	-8.06244	1060.37	6.38843e-08	1.46092e-07	1.27433e-06	1.48848e-07	3.40893e-06	7.9265e-07	6.28471e-06	79558.2	0.400275	1.20018e-05	186345	71221.2
492	60	14	26	1.41	1.06	5	6	38	0.1	sandy clay loam	0.16	13	1.8232	1.38041	1e-05	0.0097157	1.11868e-07	0.66407	0.902721	0.716301	-6.7146	-8.06244	1060.37	6.38843e-08	1.46092e-07	1.27433e-06	1.48848e-07	3.40893e-06	7.9265e-07	6.28471e-06	79558.2	0.400275	1.20018e-05	186345	71221.2
494	60	14	26	1.41	1.06	5	6	38	0.1	sandy clay loam	0.16	13	1.8232	1.38041	1e-05	0.0097157	1.11868e-07	0.66407	0.902721	0.716301	-6.7146	-8.06244	1060.37	6.38843e-08	1.46092e-07	1.27433e-06	1.48848e-07	3.40893e-06	7.9265e-07	6.28471e-06	79558.2	0.400275	1.20018e-05	186345	71221.2
495	28	20	52	1.24	1.65	4.9	9	24	0.1	clay (light)	0.2	24	2.838	1.5377	1.25893e-05	0.022	8.40027e-10	0.561029	0.865459	0.975986	-6.48834	-7.92313	1162.69	7.98957e-08	1.53411e-07	1.27738e-06	1.8308e-07	4.28882e-06	8.37773e-07	1.05665e-05	47319.1	0.394253	1.29293e-05	201351	48567.1
509	60	14	26	1.41	1.06	5	6	38	0.1	sandy clay loam	0.16	13	1.8232	1.38041	1e-05	0.0097157	1.11868e-07	0.66407	0.902721	0.716301	-6.7146	-8.06244	1060.37	6.38843e-08	1.46092e-07	1.27433e-06	1.48848e-07	3.40893e-06	7.9265e-07	6.28471e-06	79558.2	0.400275	1.20018e-05	99407.6	37993.6
522	60	14	26	1.41	1.06	5	6	38	0.1	sandy clay loam	0.16	13	1.8232	1.38041	1e-05	0.0097157	1.11868e-07	0.66407	0.902721	0.716301	-6.7146	-8.06244	1060.37	6.38843e-08	1.46092e-07	1.27433e-06	1.48848e-07	3.40893e-06	7.9265e-07	6.28471e-06	79558.2	0.400275	1.20018e-05	99407.6	37993.6
533	60	14	26	1.41	1.06	5	6	38	0.1	sandy clay loam	0.16	13	1.8232	1.38041	1e-05	0.0097157	1.11868e-07	0.66407	0.902721	0.716301	-6.7146	-8.06244	1060.37	6.38843e-08	1.46092e-07	1.27433e-06	1.48848e-07	3.40893e-06	7.9265e-07	6.28471e-06	79558.2	0.400275	1.20018e-05	99407.6	37993.6
534	60	14	26	1.41	1.06	5	6	38	0.1	sandy clay loam	0.16	13	1.8232	1.38041	1e-05	0.0097157	1.11868e-07	0.66407	0.902721	0.716301	-6.7146	-8.06244	1060.37	6.38843e-08	1.46092e-07	1.27433e-06	1.48848e-07	3.40893e-06	7.9265e-07	6.28471e-06	79558.2	0.400275	1.20018e-05	99407.6	37993.6
537	60	14	26	1.41	1.06	5	6	38	0.1	sandy clay loam	0.16	13	1.8232	1.38041	1e-05	0.0097157	1.11868e-07	0.66407	0.902721	0.716301	-6.7146	-8.06244	1060.37	6.38843e-08	1.46092e-07	1.27433e-06	1.48848e-07	3.40893e-06	7.9265e-07	6.28471e-06	79558.2	0.400275	1.20018e-05	99407.6	37993.6
538	60	14	26	1.41	1.06	5	6	38	0.1	sandy clay loam	0.16	13	1.8232	1.38041	1e-05	0.0097157	1.11868e-07	0.66407	0.902721	0.716301	-6.7146	-8.06244	1060.37	6.38843e-08	1.46092e-07	1.27433e-06	1.48848e-07	3.40893e-06	7.9265e-07	6.28471e-06	79558.2	0.400275	1.20018e-05	99407.6	37993.6
540	60	14	26	1.41	1.06	5	6	38	0.1	sandy clay loam	0.16	13	1.8232	1.38041	1e-05	0.0097157	1.11868e-07	0.66407	0.902721	0.716301	-6.7146	-8.06244	1060.37	6.38843e-08	1.46092e-07	1.27433e-06	1.48848e-07	3.40893e-06	7.9265e-07	6.28471e-06	79558.2	0.400275	1.20018e-05	99407.6	37993.6
542	60	14	26	1.41	1.06	5	6	38	0.1	sandy clay loam	0.16	13	1.8232	1.38041	1e-05	0.0097157	1.11868e-07	0.66407	0.902721	0.716301	-6.7146	-8.06244	1060.37	6.38843e-08	1.46092e-07	1.27433e-06	1.48848e-07	3.40893e-06	7.9265e-07	6.28471e-06	79558.2	0.400275	1.20018e-05	99407.6	37993.6
544	28	20	52	1.24	1.65	4.9	9	24	0.1	clay (light)	0.2	24	2.838	1.5377	1.25893e-05	0.022	8.40027e-10	0.561029	0.865459	0.975986	-6.48834	-7.92313	1162.69	7.98957e-08	1.53411e-07	1.27738e-06	1.8308e-07	4.28882e-06	8.37773e-07	1.05665e-05	47319.1	0.394253	1.29293e-05	108146	26085.6
546	60	14	26	1.41	1.06	5	6	38	0.1	sandy clay loam	0.16	13	1.8232	1.38041	1e-05	0.0097157	1.11868e-07	0.66407	0.902721	0.716301	-6.7146	-8.06244	1060.37	6.38843e-08	1.46092e-07	1.27433e-06	1.48848e-07	3.40893e-06	7.9265e-07	6.28471e-06	79558.2	0.400275	1.20018e-05	99407.6	37993.6
548	60	14	26	1.41	1.06	5	6	38	0.1	sandy clay loam	0.16	13	1.8232	1.38041	1e-05	0.0097157	1.11868e-07	0.66407	0.902721	0.716301	-6.7146	-8.06244	1060.37	6.38843e-08	1.46092e-07	1.27433e-06	1.48848e-07	3.40893e-06	7.9265e-07	6.28471e-06	79558.2	0.400275	1.20018e-05	99407.6	37993.6
549	60	14	26	1.41	1.06	5	6	38	0.1	sandy clay loam	0.16	13	1.8232	1.38041	1e-05	0.0097157	1.11868e-07	0.66407	0.902721	0.716301	-6.7146	-8.06244	1060.37	6.38843e-08	1.46092e-07	1.27433e-06	1.48848e-07	3.40893e-06	7.9265e-07	6.28471e-06	79558.2	0.400275	1.20018e-05	99407.6	37993.6
551	60	14	26	1.41	1.06	5	6	38	0.1	sandy clay loam	0.16	13	1.8232	1.38041	1e-05	0.0097157	1.11868e-07	0.66407	0.902721	0.716301	-6.7146	-8.06244	1060.37	6.38843e-08	1.46092e-07	1.27433e-06	1.48848e-07	3.40893e-06	7.9265e-07	6.28471e-06	79558.2	0.400275	1.20018e-05	186345	71221.2
552	60	14	26	1.41	1.06	5	6	38	0.1	sandy clay loam	0.16	13	1.8232	1.38041	1e-05	0.0097157	1.11868e-07	0.66407	0.902721	0.716301	-6.7146	-8.06244	1060.37	6.38843e-08	1.46092e-07	1.27433e-06	1.48848e-07	3.40893e-06	7.9265e-07	6.28471e-06	79558.2	0.400275	1.20018e-05	186345	71221.2
554	60	14	26	1.41	1.06	5	6	38	0.1	sandy clay loam	0.16	13	1.8232	1.38041	1e-05	0.0097157	1.11868e-07	0.66407	0.902721	0.716301	-6.7146	-8.06244	1060.37	6.38843e-08	1.46092e-07	1.27433e-06	1.48848e-07	3.40893e-06	7.9265e-07	6.28471e-06	79558.2	0.400275	1.20018e-05	99407.6	37993.6
555	60	14	26	1.41	1.06	5	6	38	0.1	sandy clay loam	0.16	13	1.8232	1.38041	1e-05	0.0097157	1.11868e-07	0.66407	0.902721	0.716301	-6.7146	-8.06244	1060.37	6.38843e-08	1.46092e-07	1.27433e-06	1.48848e-07	3.40893e-06	7.9265e-07	6.28471e-06	79558.2	0.400275	1.20018e-05	99407.6	37993.6
556	60	14	26	1.41	1.06	5	6	38	0.1	sandy clay loam	0.16	13	1.8232	1.38041	1e-05	0.0097157	1.11868e-07	0.66407	0.902721	0.716301	-6.7146	-8.06244	1060.37	6.38843e-08	1.46092e-07	1.27433e-06	1.48848e-07	3.40893e-06	7.9265e-07	6.28471e-06	79558.2	0.400275	1.20018e-05	99407.6	37993.6
557	60	14	26	1.41	1.06	5	6	38	0.1	sandy clay loam	0.16	13	1.8232	1.38041	1e-05	0.0097157	1.11868e-07	0.66407	0.902721	0.716301	-6.7146	-8.06244	1060.37	6.38843e-08	1.46092e-07	1.27433e-06	1.48848e-07	3.40893e-06	7.9265e-07	6.28471e-06	79558.2	0.400275	1.20018e-05	99407.6	37993.6
564	57	15	28	1.39	0.98	4.7	5	44	0.1	sandy clay loam	0.16	13	1.6856	1.40653	1.99526e-05	0.0033835	8.95818e-08	0.775353	0.938372	0.710014	-6.68819	-7.7372	997.814	1.25428e-07	1.74223e-07	1.28605e-06	2.80426e-07	6.791e-06	9.66103e-07	8.00383e-06	62470.1	0.394522	2.61203e-05	93997.3	60511.2
569	62	12	26	1.41	0.68	5.4	5	75	0.1	sandy clay loam	0.16	13	1.1696	1.17167	3.98107e-06	0.00848936	3.83237e-07	0.679888	0.908049	0.711867	-6.82818	-8.29444	1377.33	2.66652e-08	1.2908e-07	1.26723e-06	6.92751e-08	1.36359e-06	6.87759e-07	3.83263e-06	130459	0.396209	7.10689e-06	126041	46300.7
570	22	19	59	1.21	1.42	5.4	10	61	0.1	clay(heavy)	0.2	24	2.4424	1.40511	3.98107e-06	0.03369	5.30651e-09	0.504765	0.842893	0.965107	-6.58136	-8.37392	1440.4	2.66652e-08	1.2908e-07	1.26723e-06	6.92751e-08	1.36359e-06	6.87749e-07	6.45289e-06	77484.6	0.3845	4.81176e-06	131190	18806.8
572	62	12	26	1.41	0.68	5.4	5	75	0.1	sandy clay loam	0.16	13	1.1696	1.17167	3.98107e-06	0.00848936	3.83237e-07	0.679888	0.908049	0.711867	-6.82818	-8.29444	1377.33	2.66652e-08	1.2908e-07	1.26723e-06	6.92751e-08	1.36359e-06	6.87759e-07	3.83263e-06	130459	0.396209	7.10689e-06	126041	46300.7
575	22	19	59	1.21	1.42	5.4	10	61	0.1	clay(heavy)	0.2	24	2.4424	1.40511	3.98107e-06	0.03369	5.30651e-09	0.504765	0.842893	0.965107	-6.58136	-8.37392	1440.4	2.66652e-08	1.2908e-07	1.26723e-06	6.92751e-08	1.36359e-06	6.87749e-07	6.45289e-06	77484.6	0.3845	4.81176e-06	131190	18806.8
580	62	12	26	1.41	0.68	5.4	5	75	0.1	sandy clay loam	0.16	13	1.1696	1.17167	3.98107e-06	0.00848936	3.83237e-07	0.679888	0.908049	0.711867	-6.82818	-8.29444	1377.33	2.66652e-08	1.2908e-07	1.26723e-06	6.92751e-08	1.36359e-06	6.87759e-07	3.83263e-06	130459	0.396209	7.10689e-06	126041	46300.7
583	79	7	14	1.54	0.7	4.8	3	29	0.1	sandy loam	0.2	13	1.204	1.28286	1.58489e-05	0.000156125	2.28111e-08	0.943674	0.985611	0.758129	-6.71611	-7.66817	1064.06	1.00052e-07	1.62624e-07	1.28122e-06	2.26173e-07	5.39649e-06	8.94582e-07	7.16964e-06	69738.5	0.440743	3.09239e-05	186895	177644
584	64	12	24	1.43	0.73	4.6	5	44	0.1	sandy clay loam	0.16	13	1.2556	1.33016	2.51189e-05	0.00295642	8.78748e-06	0.787414	0.942	0.71852	-6.70761	-7.51648	1043.43	1.57375e-07	1.88826e-07	1.29214e-06	3.48727e-07	8.5466e-06	1.05638e-06	9.07971e-06	55067.8	0.402325	4.1388e-05	183819	168554
593	64	12	24	1.43	0.73	4.6	5	44	0.1	sandy clay loam	0.16	13	1.2556	1.33016	2.51189e-05	0.00295642	8.78748e-06	0.787414	0.942	0.71852	-6.70761	-7.51648	1043.43	1.57375e-07	1.88826e-07	1.29214e-06	3.48727e-07	8.5466e-06	1.05638e-06	9.07971e-06	55067.8	0.402325	4.1388e-05	97948.2	89814.3
594	64	12	24	1.43	0.73	4.6	5	44	0.1	sandy clay loam	0.16	13	1.2556	1.33016	2.51189e-05	0.00295642	8.78748e-06	0.787414	0.942	0.71852	-6.70761	-7.51648	1043.43	1.57375e-07	1.88826e-07	1.29214e-06	3.48727e-07	8.5466e-06	1.05638e-06	9.07971e-06	55067.8	0.402325	4.1388e-05	97948.2	89814.3
598	64	12	24	1.43	0.73	4.6	5	44	0.1	sandy clay loam	0.16	13	1.2556	1.33016	2.51189e-05	0.00295642	8.78748e-06	0.787414	0.942	0.71852	-6.70761	-7.51648	1043.43	1.57375e-07	1.88826e-07	1.29214e-06	3.48727e-07	8.5466e-06	1.05638e-06	9.07971e-06	55067.8	0.402325	4.1388e-05	97948.2	89814.3
600	79	7	14	1.54	0.7	4.8	3	29	0.1	sandy loam	0.2	13	1.204	1.28286	1.58489e-05	0.000156125	2.28111e-08	0.943674	0.985611	0.758129	-6.71611	-7.66817	1064.06	1.00052e-07	1.62624e-07	1.28122e-06	2.26173e-07	5.39649e-06	8.94582e-07	7.16964e-06	69738.5	0.440743	3.09239e-05	99725.6	94789.3
602	64	12	24	1.43	0.73	4.6	5	44	0.1	sandy clay loam	0.16	13	1.2556	1.33016	2.51189e-05	0.00295642	8.78748e-06	0.787414	0.942	0.71852	-6.70761	-7.51648	1043.43	1.57375e-07	1.88826e-07	1.29214e-06	3.48727e-07	8.5466e-06	1.05638e-06	9.07971e-06	55067.8	0.402325	4.1388e-05	97948.2	89814.3
604	32	14	54	1.25	1.63	4.4	8	13	0.1	clay (light)	0.2	24	2.8036	1.61883	3.98107e-05	0.01283	1.3105e-08	0.630244	0.890999	0.973061	-6.42452	-7.42079	1003.78	2.48224e-07	2.30352e-07	1.30945e-06	5.42959e-07	1.35391e-05	1.31219e-06	1.9101e-05	26176.7	0.391607	4.10542e-05	94515.8	39776.5
605	79	7	14	1.54	0.7	4.8	3	29	0.1	sandy loam	0.2	13	1.204	1.28286	1.58489e-05	0.000156125	2.28111e-08	0.943674	0.985611	0.758129	-6.71611	-7.66817	1064.06	1.00052e-07	1.62624e-07	1.28122e-06	2.26173e-07	5.39649e-06	8.94582e-07	7.16964e-06	69738.5	0.440743	3.09239e-05	99725.6	94789.3
606	79	7	14	1.54	0.7	4.8	3	29	0.1	sandy loam	0.2	13	1.204	1.28286	1.58489e-05	0.000156125	2.28111e-08	0.943674	0.985611	0.758129	-6.71611	-7.66817	1064.06	1.00052e-07	1.62624e-07	1.28122e-06	2.26173e-07	5.39649e-06	8.94582e-07	7.16964e-06	69738.5	0.440743	3.09239e-05	186895	177644
607	79	7	14	1.54	0.7	4.8	3	29	0.1	sandy loam	0.2	13	1.204	1.28286	1.58489e-05	0.000156125	2.28111e-08	0.943674	0.985611	0.758129	-6.71611	-7.66817	1064.06	1.00052e-07	1.62624e-07	1.28122e-06	2.26173e-07	5.39649e-06	8.94582e-07	7.16964e-06	69738.5	0.440743	3.09239e-05	186895	177644
608	38	40	22	1.39	1.27	5.8	12	82	0.1	loam	0.32	23	2.1844	1.30171	1.58489e-06	0.06146	0.000177095	0.427468	0.808585	1.01596	-6.61895	-8.68958	1505.2	1.1848e-08	1.22307e-07	1.26441e-06	3.75965e-08	5.4932e-07	6.50769e-07	8.11396e-06	61622.2	0.451059	2.88193e-06	248551	19909.9
609	38	40	22	1.39	1.27	5.8	12	82	0.1	loam	0.32	23	2.1844	1.30171	1.58489e-06	0.06146	0.000177095	0.427468	0.808585	1.01596	-6.61895	-8.68958	1505.2	1.1848e-08	1.22307e-07	1.26441e-06	3.75965e-08	5.4932e-07	6.50769e-07	8.11396e-06	61622.2	0.451059	2.88193e-06	136429	10928.5
610	40	39	21	1.4	1.25	5.1	11	47	0.1	loam	0.32	23	2.15	1.41568	7.94328e-06	0.03492	2.48837e-05	0.500038	0.840913	1.01926	-6.52501	-7.98077	1212.42	5.11662e-08	1.40279e-07	1.2719e-06	1.21657e-07	2.71002e-06	7.57474e-07	1.47532e-05	33891	0.454495	1.45238e-05	112344	25132.9
612	78	13	9	1.6	0.56	6.3	6	74	0.1	sandy loam	0.2	13	0.9632	0.957113	5.01187e-07	0.0288	2.62541e-05	0.525488	0.851414	0.788713	-6.92796	-9.05715	1733.08	5.14678e-09	1.19244e-07	1.26313e-06	2.32695e-08	1.81058e-07	6.2781e-07	2.72604e-06	183417	0.4729	1.13275e-06	154460	15176
615	78	13	9	1.6	0.56	6.3	6	74	0.1	sandy loam	0.2	13	0.9632	0.957113	5.01187e-07	0.0288	2.62541e-05	0.525488	0.851414	0.788713	-6.92796	-9.05715	1733.08	5.14678e-09	1.19244e-07	1.26313e-06	2.32695e-08	1.81058e-07	6.2781e-07	2.72604e-06	183417	0.4729	1.13275e-06	154460	15176
616	78	13	9	1.6	0.56	6.3	6	74	0.1	sandy loam	0.2	13	0.9632	0.957113	5.01187e-07	0.0288	2.62541e-05	0.525488	0.851414	0.788713	-6.92796	-9.05715	1733.08	5.14678e-09	1.19244e-07	1.26313e-06	2.32695e-08	1.81058e-07	6.2781e-07	2.72604e-06	183417	0.4729	1.13275e-06	154460	15176
618	78	13	9	1.6	0.56	6.3	6	74	0.1	sandy loam	0.2	13	0.9632	0.957113	5.01187e-07	0.0288	2.62541e-05	0.525488	0.851414	0.788713	-6.92796	-9.05715	1733.08	5.14678e-09	1.19244e-07	1.26313e-06	2.32695e-08	1.81058e-07	6.2781e-07	2.72604e-06	183417	0.4729	1.13275e-06	154460	15176
620	37	40	23	1.38	1.07	6.2	13	88	0.1	loam	0.32	23	1.8404	1.17939	6.30957e-07	0.08447	0.000241459	0.389683	0.790092	1.01095	-6.69776	-9.02741	1804.69	5.94924e-09	1.19611e-07	1.26329e-06	2.49851e-08	2.25157e-07	6.35881e-07	6.33976e-06	78867.4	0.445882	1.34898e-06	160002	7590.13
621	37	40	23	1.38	1.07	6.2	13	88	0.1	loam	0.32	23	1.8404	1.17939	6.30957e-07	0.08447	0.000241459	0.389683	0.790092	1.01095	-6.69776	-9.02741	1804.69	5.94924e-09	1.19611e-07	1.26329e-06	2.49851e-08	2.25157e-07	6.35881e-07	6.33976e-06	78867.4	0.445882	1.34898e-06	160002	7590.13
624	82	12	6	1.67	0.68	5.4	6	75	0.1	loamy sand	0.17	13	1.1696	1.17167	3.98107e-06	0.02217	0.000331794	0.560018	0.865069	0.820764	-6.76285	-8.20624	1184.95	2.66652e-08	1.2908e-07	1.26723e-06	6.92751e-08	1.36359e-06	6.96705e-07	4.95446e-06	100919	0.50912	6.07884e-06	110030	34365.7
626	82	12	6	1.67	0.68	5.4	6	75	0.1	loamy sand	0.17	13	1.1696	1.17167	3.98107e-06	0.02217	0.000331794	0.560018	0.865069	0.820764	-6.76285	-8.20624	1184.95	2.66652e-08	1.2908e-07	1.26723e-06	6.92751e-08	1.36359e-06	6.96705e-07	4.95446e-06	100919	0.50912	6.07884e-06	110030	34365.7
627	33	45	22	1.38	3.71	5.5	18	34	0.1	loam	0.32	23	6.3812	1.69258	3.16228e-06	0.09054	4.62285e-12	0.381878	0.786106	1.02667	-6.43411	-8.79526	983.433	2.16021e-08	1.26766e-07	1.26627e-06	5.84503e-08	1.08535e-06	6.73479e-07	1.22489e-05	40819.9	0.462318	2.22038e-06	92746	3886.3
628	33	45	22	1.38	3.71	5.5	18	34	0.1	loam	0.32	23	6.3812	1.69258	3.16228e-06	0.09054	4.62285e-12	0.381878	0.786106	1.02667	-6.43411	-8.79526	983.433	2.16021e-08	1.26766e-07	1.26627e-06	5.84503e-08	1.08535e-06	6.73479e-07	1.22489e-05	40819.9	0.462318	2.22038e-06	92746	3886.3
630	33	45	22	1.38	3.71	5.5	18	34	0.1	loam	0.32	23	6.3812	1.69258	3.16228e-06	0.09054	4.62285e-12	0.381878	0.786106	1.02667	-6.43411	-8.79526	983.433	2.16021e-08	1.26766e-07	1.26627e-06	5.84503e-08	1.08535e-06	6.73479e-07	1.22489e-05	40819.9	0.462318	2.22038e-06	174768	7323.21
676	49	32	19	1.43	1.1	5	7	36	0.1	loam	0.32	23	1.892	1.39215	1e-05	0.01271	9.51976e-07	0.631412	0.891412	1.02541	-6.52436	-7.82638	1210.6	6.38843e-08	1.46092e-07	1.27433e-06	1.48848e-07	3.40893e-06	7.92672e-07	1.32196e-05	37822.7	0.460983	2.00038e-05	112191	39129.9
677	49	32	19	1.43	1.1	5	7	36	0.1	loam	0.32	23	1.892	1.39215	1e-05	0.01271	9.51976e-07	0.631412	0.891412	1.02541	-6.52436	-7.82638	1210.6	6.38843e-08	1.46092e-07	1.27433e-06	1.48848e-07	3.40893e-06	7.92672e-07	1.32196e-05	37822.7	0.460983	2.00038e-05	208228	72625.4
691	81	11	8	1.62	0.58	6.7	6	88	0.1	loamy sand	0.17	13	0.9976	0.900238	1.99526e-07	0.03669	1.59918e-05	0.493534	0.838165	0.79781	-6.9717	-9.46335	1916.72	3.28141e-09	1.18391e-07	1.26278e-06	1.92814e-08	7.85485e-08	6.22276e-07	1.92478e-06	259770	0.482911	3.65482e-07	168558	7728.09
697	19	32	49	1.24	1.26	6.4	27	93	0.1	clay (light)	0.2	24	2.1672	1.19721	3.98107e-07	0.24041	0.000606043	0.297792	0.738717	0.977705	-6.72351	-9.31751	1998.16	4.50937e-09	1.18953e-07	1.26301e-06	2.19067e-08	1.4603e-07	6.41664e-07	4.50896e-06	110890	0.395817	5.19375e-07	174691	3982.35
714	47	29	24	1.39	0.86	6.4	12	89	0.1	loam	0.32	23	1.4792	1.07612	3.98107e-07	0.08436	0.000181828	0.389831	0.790167	1.0056	-6.75598	-9.14729	2063.58	4.50937e-09	1.18953e-07	1.26301e-06	2.19067e-08	1.4603e-07	6.30213e-07	5.49451e-06	90999.9	0.44043	1.0288e-06	179566	7404.16
715	47	29	24	1.39	0.86	6.4	12	89	0.1	loam	0.32	23	1.4792	1.07612	3.98107e-07	0.08436	0.000181828	0.389831	0.790167	1.0056	-6.75598	-9.14729	2063.58	4.50937e-09	1.18953e-07	1.26301e-06	2.19067e-08	1.4603e-07	6.30213e-07	5.49451e-06	90999.9	0.44043	1.0288e-06	179566	7404.16
733	79	11	10	1.59	0.53	6.3	4	76	0.1	sandy loam	0.2	13	0.9116	0.939657	5.01187e-07	0.01286	7.86541e-09	0.629954	0.890896	0.780338	-6.94008	-9.04265	1782.13	5.14678e-09	1.19244e-07	1.26313e-06	2.32695e-08	1.81058e-07	6.27102e-07	2.27355e-06	219921	0.463869	1.20152e-06	283623	34764.2
738	79	11	10	1.59	0.53	6.3	4	76	0.1	sandy loam	0.2	13	0.9116	0.939657	5.01187e-07	0.01286	7.86541e-09	0.629954	0.890896	0.780338	-6.94008	-9.04265	1782.13	5.14678e-09	1.19244e-07	1.26313e-06	2.32695e-08	1.81058e-07	6.27102e-07	2.27355e-06	219921	0.463869	1.20152e-06	283623	34764.2
777	79	11	10	1.59	0.53	6.3	4	76	0.1	sandy loam	0.2	13	0.9116	0.939657	5.01187e-07	0.01286	7.86541e-09	0.629954	0.890896	0.780338	-6.94008	-9.04265	1782.13	5.14678e-09	1.19244e-07	1.26313e-06	2.32695e-08	1.81058e-07	6.27102e-07	2.27355e-06	219921	0.463869	1.20152e-06	158262	19398.5
778	26	25	49	1.25	1.45	5.9	15	73	0.1	clay (light)	0.2	24	2.494	1.32673	1.25893e-06	0.07585	2.14329e-05	0.402126	0.796325	0.979108	-6.63742	-8.87066	1638.85	9.83242e-09	1.21386e-07	1.26403e-06	3.32872e-08	4.38553e-07	6.40886e-07	4.91323e-06	101766	0.397098	1.43694e-06	147078	8540.53
781	26	25	49	1.25	1.45	5.9	15	73	0.1	clay (light)	0.2	24	2.494	1.32673	1.25893e-06	0.07585	2.14329e-05	0.402126	0.796325	0.979108	-6.63742	-8.87066	1638.85	9.83242e-09	1.21386e-07	1.26403e-06	3.32872e-08	4.38553e-07	6.40886e-07	4.91323e-06	101766	0.397098	1.43694e-06	147078	8540.53
785	80	10	10	1.59	0.6	6.2	6	83	0.1	sandy loam	0.2	13	1.032	0.995986	6.30957e-07	0.02889	6.45133e-05	0.525075	0.851247	0.781577	-6.90993	-8.9896	1662.57	5.94924e-09	1.19611e-07	1.26329e-06	2.49851e-08	2.25157e-07	6.31105e-07	2.93695e-06	170244	0.465194	1.35377e-06	268798	28818.9
786	42	36	22	1.4	0.94	6.1	14	89	0.1	loam	0.32	23	1.6168	1.15532	7.94328e-07	0.10864	0.00048526	0.362288	0.775825	1.01296	-6.69982	-8.87571	1813.26	6.95947e-09	1.20073e-07	1.26348e-06	2.71449e-08	2.80673e-07	6.45309e-07	7.38569e-06	67698.5	0.447948	1.87691e-06	287407	16358.6
795	44	33	23	1.39	0.99	4.9	9	51	0.1	loam	0.32	23	1.7028	1.37575	1.25893e-05	0.02294	0.000113525	0.555529	0.86333	1.01017	-6.53365	-7.698	1236.78	7.98957e-08	1.53411e-07	1.27738e-06	1.8308e-07	4.28882e-06	8.40837e-07	1.70843e-05	29266.7	0.445086	2.86453e-05	211946	79085.5
800	22	23	55	1.22	1.32	5.6	14	61	0.1	clay (light)	0.2	24	2.2704	1.34795	2.51189e-06	0.06067	2.35108e-06	0.429065	0.809339	0.969592	-6.61494	-8.54206	1556.19	1.75803e-08	1.24927e-07	1.2655e-06	4.98519e-08	8.64331e-07	6.62208e-07	6.13968e-06	81437.4	0.388491	3.20703e-06	140517	14257.3
814	44	33	23	1.39	0.99	4.9	9	51	0.1	loam	0.32	23	1.7028	1.37575	1.25893e-05	0.02294	0.000113525	0.555529	0.86333	1.01017	-6.53365	-7.698	1236.78	7.98957e-08	1.53411e-07	1.27738e-06	1.8308e-07	4.28882e-06	8.40837e-07	1.70843e-05	29266.7	0.445086	2.86453e-05	211946	79085.5
816	44	33	23	1.39	0.99	4.9	9	51	0.1	loam	0.32	23	1.7028	1.37575	1.25893e-05	0.02294	0.000113525	0.555529	0.86333	1.01017	-6.53365	-7.698	1236.78	7.98957e-08	1.53411e-07	1.27738e-06	1.8308e-07	4.28882e-06	8.40837e-07	1.70843e-05	29266.7	0.445086	2.86453e-05	114389	42683
819	17	27	56	1.21	1.74	6	15	72	0.1	clay (light)	0.2	24	2.9928	1.36754	1e-06	0.07503	1.65002e-07	0.403404	0.796957	0.971013	-6.63221	-9.04769	1619.32	8.23128e-09	1.20654e-07	1.26372e-06	2.9864e-08	3.50564e-07	6.358e-07	4.48774e-06	111415	0.389764	1.00607e-06	145535	6358.3
843	49	28	23	1.4	0.58	6.2	9	81	0.1	loam	0.32	23	0.9976	0.985238	6.30957e-07	0.05378	0.000187204	0.444128	0.816351	1.00483	-6.78034	-8.79566	2182.64	5.94924e-09	1.19611e-07	1.26329e-06	2.49851e-08	2.25157e-07	6.34417e-07	5.56044e-06	89920.9	0.439646	2.29943e-06	188322	17119.3
844	49	28	23	1.4	0.58	6.2	9	81	0.1	loam	0.32	23	0.9976	0.985238	6.30957e-07	0.05378	0.000187204	0.444128	0.816351	1.00483	-6.78034	-8.79566	2182.64	5.94924e-09	1.19611e-07	1.26329e-06	2.49851e-08	2.25157e-07	6.34417e-07	5.56044e-06	89920.9	0.439646	2.29943e-06	188322	17119.3
853	45	30	25	1.38	2.6	5.3	20	61	0.1	loam	0.32	23	4.472	1.61387	5.01187e-06	0.10173	4.42227e-05	0.369191	0.779494	1.01362	-6.46088	-8.46841	1045.98	3.30394e-08	1.31993e-07	1.26845e-06	8.29028e-08	1.71387e-06	7.06907e-07	1.57924e-05	31660.8	0.448638	4.85649e-06	98167.7	6771.89
855	26	33	41	1.27	30.73	4.4	77	58	0.1	clay (light)	0.2	16	52.8556	2.54986	3.98107e-05	0.43119	2.13795e-11	0.283892	0.729942	0.819991	-6.13796	-8.67986	345.929	2.48224e-07	2.30352e-07	1.30945e-06	5.42959e-07	1.35391e-05	1.31219e-06	4.24045e-05	11791.2	0.412925	3.16566e-06	34329.4	529.126
856	25	35	40	1.27	38.37	5.9	88	100	0.1	clay (light)	0.2	16	65.9964	2.36525	1.25893e-06	0.63303	2.97887e-15	0.303026	0.741942	0.824043	-6.30836	-10.2624	512.148	9.83242e-09	1.21386e-07	1.26403e-06	3.32872e-08	4.38553e-07	6.40308e-07	6.51905e-06	76698.3	0.416795	8.2011e-08	50137.9	131.446
857	25	35	40	1.27	38.37	5.9	88	100	0.1	clay (light)	0.2	16	65.9964	2.36525	1.25893e-06	0.63303	2.97887e-15	0.303026	0.741942	0.824043	-6.30836	-10.2624	512.148	9.83242e-09	1.21386e-07	1.26403e-06	3.32872e-08	4.38553e-07	6.40308e-07	6.51905e-06	76698.3	0.416795	8.2011e-08	50137.9	131.446
859	90	7	3	1.78	2.85	4.4	4	18	0.1	sand	0.1	13	4.902	1.79597	3.98107e-05	0.000635005	3.59341e-11	0.891355	0.971656	0.886554	-6.40443	-7.70683	519.135	2.48224e-07	2.30352e-07	1.30945e-06	5.42959e-07	1.35391e-05	1.31219e-06	6.7528e-06	74043.3	0.592393	9.1052e-06	50793.2	20285.7
864	89	6	5	1.7	0.4	6.4	3	100	0.1	sand	0.1	13	0.688	0.83344	3.98107e-07	0.0081224	4.87455e-06	0.684976	0.909743	0.829003	-6.96058	-8.99446	1868.24	4.50937e-09	1.18953e-07	1.26301e-06	2.19067e-08	1.4603e-07	6.25437e-07	9.75955e-07	512319	0.518872	5.61272e-07	294016	43867.7
867	89	6	5	1.7	0.4	6.4	3	100	0.1	sand	0.1	13	0.688	0.83344	3.98107e-07	0.0081224	4.87455e-06	0.684976	0.909743	0.829003	-6.96058	-8.99446	1868.24	4.50937e-09	1.18953e-07	1.26301e-06	2.19067e-08	1.4603e-07	6.25437e-07	9.75955e-07	512319	0.518872	5.61272e-07	164872	24599.2
869	89	6	5	1.7	0.4	6.4	3	100	0.1	sand	0.1	13	0.688	0.83344	3.98107e-07	0.0081224	4.87455e-06	0.684976	0.909743	0.829003	-6.96058	-8.99446	1868.24	4.50937e-09	1.18953e-07	1.26301e-06	2.19067e-08	1.4603e-07	6.25437e-07	9.75955e-07	512319	0.518872	5.61272e-07	164872	24599.2
870	89	6	5	1.7	0.4	6.4	3	100	0.1	sand	0.1	13	0.688	0.83344	3.98107e-07	0.0081224	4.87455e-06	0.684976	0.909743	0.829003	-6.96058	-8.99446	1868.24	4.50937e-09	1.18953e-07	1.26301e-06	2.19067e-08	1.4603e-07	6.25437e-07	9.75955e-07	512319	0.518872	5.61272e-07	164872	24599.2
874	89	6	5	1.7	0.4	6.4	3	100	0.1	sand	0.1	13	0.688	0.83344	3.98107e-07	0.0081224	4.87455e-06	0.684976	0.909743	0.829003	-6.96058	-8.99446	1868.24	4.50937e-09	1.18953e-07	1.26301e-06	2.19067e-08	1.4603e-07	6.25437e-07	9.75955e-07	512319	0.518872	5.61272e-07	164872	24599.2
882	89	6	5	1.7	0.4	6.4	3	100	0.1	sand	0.1	13	0.688	0.83344	3.98107e-07	0.0081224	4.87455e-06	0.684976	0.909743	0.829003	-6.96058	-8.99446	1868.24	4.50937e-09	1.18953e-07	1.26301e-06	2.19067e-08	1.4603e-07	6.25437e-07	9.75955e-07	512319	0.518872	5.61272e-07	164872	24599.2
897	89	5	6	1.68	0.4	5.6	2	71	0.1	sand	0.1	13	0.688	0.96944	2.51189e-06	6.03449e-05	2.25338e-08	0.964385	0.990975	0.815463	-6.86126	-8.20543	1486.33	1.75803e-08	1.24927e-07	1.2655e-06	4.98519e-08	8.64331e-07	6.62145e-07	1.36578e-06	366091	0.502944	3.60484e-06	246065	163322
898	89	5	6	1.68	0.4	5.6	2	71	0.1	sand	0.1	13	0.688	0.96944	2.51189e-06	6.03449e-05	2.25338e-08	0.964385	0.990975	0.815463	-6.86126	-8.20543	1486.33	1.75803e-08	1.24927e-07	1.2655e-06	4.98519e-08	8.64331e-07	6.62145e-07	1.36578e-06	366091	0.502944	3.60484e-06	134909	89543.4
902	89	5	6	1.68	0.4	5.6	2	71	0.1	sand	0.1	13	0.688	0.96944	2.51189e-06	6.03449e-05	2.25338e-08	0.964385	0.990975	0.815463	-6.86126	-8.20543	1486.33	1.75803e-08	1.24927e-07	1.2655e-06	4.98519e-08	8.64331e-07	6.62145e-07	1.36578e-06	366091	0.502944	3.60484e-06	134909	89543.4
903	89	5	6	1.68	0.4	5.6	2	71	0.1	sand	0.1	13	0.688	0.96944	2.51189e-06	6.03449e-05	2.25338e-08	0.964385	0.990975	0.815463	-6.86126	-8.20543	1486.33	1.75803e-08	1.24927e-07	1.2655e-06	4.98519e-08	8.64331e-07	6.62145e-07	1.36578e-06	366091	0.502944	3.60484e-06	134909	89543.4
912	89	5	6	1.68	0.4	5.6	2	71	0.1	sand	0.1	13	0.688	0.96944	2.51189e-06	6.03449e-05	2.25338e-08	0.964385	0.990975	0.815463	-6.86126	-8.20543	1486.33	1.75803e-08	1.24927e-07	1.2655e-06	4.98519e-08	8.64331e-07	6.62145e-07	1.36578e-06	366091	0.502944	3.60484e-06	134909	89543.4
915	89	5	6	1.68	0.4	5.6	2	71	0.1	sand	0.1	13	0.688	0.96944	2.51189e-06	6.03449e-05	2.25338e-08	0.964385	0.990975	0.815463	-6.86126	-8.20543	1486.33	1.75803e-08	1.24927e-07	1.2655e-06	4.98519e-08	8.64331e-07	6.62145e-07	1.36578e-06	366091	0.502944	3.60484e-06	134909	89543.4
918	89	5	6	1.68	0.4	5.6	2	71	0.1	sand	0.1	13	0.688	0.96944	2.51189e-06	6.03449e-05	2.25338e-08	0.964385	0.990975	0.815463	-6.86126	-8.20543	1486.33	1.75803e-08	1.24927e-07	1.2655e-06	4.98519e-08	8.64331e-07	6.62145e-07	1.36578e-06	366091	0.502944	3.60484e-06	134909	89543.4
919	89	5	6	1.68	0.4	5.6	2	71	0.1	sand	0.1	13	0.688	0.96944	2.51189e-06	6.03449e-05	2.25338e-08	0.964385	0.990975	0.815463	-6.86126	-8.20543	1486.33	1.75803e-08	1.24927e-07	1.2655e-06	4.98519e-08	8.64331e-07	6.62145e-07	1.36578e-06	366091	0.502944	3.60484e-06	134909	89543.4
929	82	10	8	1.62	0.7	5.4	4	38	0.1	loamy sand	0.17	13	1.204	1.18086	3.98107e-06	0.00423306	7.38789e-08	0.754212	0.931909	0.799689	-6.77176	-8.23451	1209.51	2.66652e-08	1.2908e-07	1.26723e-06	6.92751e-08	1.36359e-06	6.87751e-07	3.67087e-06	136208	0.485004	6.16343e-06	112100	45643
932	42	37	21	1.4	1.37	5.1	11	22	0.1	loam	0.32	23	2.3564	1.44474	7.94328e-06	0.03455	2.07637e-06	0.501442	0.841502	1.02017	-6.51265	-8.01546	1178.39	5.11662e-08	1.40279e-07	1.2719e-06	1.21657e-07	2.71002e-06	7.56858e-07	1.47099e-05	33990.7	0.455454	1.33806e-05	109476	22677.6
983	42	38	20	1.41	1.06	5.5	11	65	0.1	loam	0.32	23	1.8232	1.29541	3.16228e-06	0.04722	0.000133677	0.460704	0.823864	1.02123	-6.59879	-8.31544	1436.91	2.16021e-08	1.26766e-07	1.26627e-06	5.84503e-08	1.08535e-06	6.77088e-07	1.01622e-05	49202	0.456568	6.64264e-06	130906	19533.9
985	41	35	24	1.38	0.85	6.3	10	73	0.1	loam	0.32	23	1.462	1.08941	5.01187e-07	0.05287	1.83053e-05	0.446285	0.817341	1.00549	-6.74413	-9.04286	2008.02	5.14678e-09	1.19244e-07	1.26313e-06	2.32695e-08	1.81058e-07	6.27596e-07	5.13543e-06	97362.8	0.440312	1.31829e-06	175429	9914.4
1016	53	22	25	1.4	0.98	5.1	6	49	0.1	sandy clay loam	0.16	13	1.6856	1.33853	7.94328e-06	0.00980092	2.2481e-07	0.663032	0.902368	0.71843	-6.73686	-8.13038	1116.14	5.11662e-08	1.40279e-07	1.2719e-06	1.21657e-07	2.71002e-06	7.56808e-07	5.56239e-06	89889.5	0.402242	1.02864e-05	194579	72369.9
1017	78	12	10	1.58	0.61	6.2	4	72	0.1	sandy loam	0.2	13	1.0492	1.00123	6.30957e-07	0.01159	1.56676e-10	0.64279	0.8954	0.781742	-6.9077	-8.99585	1654.06	5.94924e-09	1.19611e-07	1.26329e-06	2.49851e-08	2.25157e-07	6.29363e-07	2.398e-06	208507	0.465371	1.34235e-06	267724	34871.6
1018	78	12	10	1.58	0.61	6.2	4	72	0.1	sandy loam	0.2	13	1.0492	1.00123	6.30957e-07	0.01159	1.56676e-10	0.64279	0.8954	0.781742	-6.9077	-8.99585	1654.06	5.94924e-09	1.19611e-07	1.26329e-06	2.49851e-08	2.25157e-07	6.29363e-07	2.398e-06	208507	0.465371	1.34235e-06	267724	34871.6
1020	53	22	25	1.4	0.98	5.1	6	49	0.1	sandy clay loam	0.16	13	1.6856	1.33853	7.94328e-06	0.00980092	2.2481e-07	0.663032	0.902368	0.71843	-6.73686	-8.13038	1116.14	5.11662e-08	1.40279e-07	1.2719e-06	1.21657e-07	2.71002e-06	7.56808e-07	5.56239e-06	89889.5	0.402242	1.02864e-05	194579	72369.9
1021	78	12	10	1.58	0.61	6.2	4	72	0.1	sandy loam	0.2	13	1.0492	1.00123	6.30957e-07	0.01159	1.56676e-10	0.64279	0.8954	0.781742	-6.9077	-8.99585	1654.06	5.94924e-09	1.19611e-07	1.26329e-06	2.49851e-08	2.25157e-07	6.29363e-07	2.398e-06	208507	0.465371	1.34235e-06	267724	34871.6
1022	53	22	25	1.4	0.98	5.1	6	49	0.1	sandy clay loam	0.16	13	1.6856	1.33853	7.94328e-06	0.00980092	2.2481e-07	0.663032	0.902368	0.71843	-6.73686	-8.13038	1116.14	5.11662e-08	1.40279e-07	1.2719e-06	1.21657e-07	2.71002e-06	7.56808e-07	5.56239e-06	89889.5	0.402242	1.02864e-05	194579	72369.9
1023	78	12	10	1.58	0.61	6.2	4	72	0.1	sandy loam	0.2	13	1.0492	1.00123	6.30957e-07	0.01159	1.56676e-10	0.64279	0.8954	0.781742	-6.9077	-8.99585	1654.06	5.94924e-09	1.19611e-07	1.26329e-06	2.49851e-08	2.25157e-07	6.29363e-07	2.398e-06	208507	0.465371	1.34235e-06	267724	34871.6
1024	78	12	10	1.58	0.61	6.2	4	72	0.1	sandy loam	0.2	13	1.0492	1.00123	6.30957e-07	0.01159	1.56676e-10	0.64279	0.8954	0.781742	-6.9077	-8.99585	1654.06	5.94924e-09	1.19611e-07	1.26329e-06	2.49851e-08	2.25157e-07	6.29363e-07	2.398e-06	208507	0.465371	1.34235e-06	267724	34871.6
1025	53	22	25	1.4	0.98	5.1	6	49	0.1	sandy clay loam	0.16	13	1.6856	1.33853	7.94328e-06	0.00980092	2.2481e-07	0.663032	0.902368	0.71843	-6.73686	-8.13038	1116.14	5.11662e-08	1.40279e-07	1.2719e-06	1.21657e-07	2.71002e-06	7.56808e-07	5.56239e-06	89889.5	0.402242	1.02864e-05	194579	72369.9
1026	53	22	25	1.4	0.98	5.1	6	49	0.1	sandy clay loam	0.16	13	1.6856	1.33853	7.94328e-06	0.00980092	2.2481e-07	0.663032	0.902368	0.71843	-6.73686	-8.13038	1116.14	5.11662e-08	1.40279e-07	1.2719e-06	1.21657e-07	2.71002e-06	7.56808e-07	5.56239e-06	89889.5	0.402242	1.02864e-05	194579	72369.9
1027	53	22	25	1.4	0.98	5.1	6	49	0.1	sandy clay loam	0.16	13	1.6856	1.33853	7.94328e-06	0.00980092	2.2481e-07	0.663032	0.902368	0.71843	-6.73686	-8.13038	1116.14	5.11662e-08	1.40279e-07	1.2719e-06	1.21657e-07	2.71002e-06	7.56808e-07	5.56239e-06	89889.5	0.402242	1.02864e-05	194579	72369.9
1028	53	22	25	1.4	0.98	5.1	6	49	0.1	sandy clay loam	0.16	13	1.6856	1.33853	7.94328e-06	0.00980092	2.2481e-07	0.663032	0.902368	0.71843	-6.73686	-8.13038	1116.14	5.11662e-08	1.40279e-07	1.2719e-06	1.21657e-07	2.71002e-06	7.56808e-07	5.56239e-06	89889.5	0.402242	1.02864e-05	194579	72369.9
1029	78	12	10	1.58	0.61	6.2	4	72	0.1	sandy loam	0.2	13	1.0492	1.00123	6.30957e-07	0.01159	1.56676e-10	0.64279	0.8954	0.781742	-6.9077	-8.99585	1654.06	5.94924e-09	1.19611e-07	1.26329e-06	2.49851e-08	2.25157e-07	6.29363e-07	2.398e-06	208507	0.465371	1.34235e-06	267724	34871.6
1030	53	22	25	1.4	0.98	5.1	6	49	0.1	sandy clay loam	0.16	13	1.6856	1.33853	7.94328e-06	0.00980092	2.2481e-07	0.663032	0.902368	0.71843	-6.73686	-8.13038	1116.14	5.11662e-08	1.40279e-07	1.2719e-06	1.21657e-07	2.71002e-06	7.56808e-07	5.56239e-06	89889.5	0.402242	1.02864e-05	194579	72369.9
1031	53	22	25	1.4	0.98	5.1	6	49	0.1	sandy clay loam	0.16	13	1.6856	1.33853	7.94328e-06	0.00980092	2.2481e-07	0.663032	0.902368	0.71843	-6.73686	-8.13038	1116.14	5.11662e-08	1.40279e-07	1.2719e-06	1.21657e-07	2.71002e-06	7.56808e-07	5.56239e-06	89889.5	0.402242	1.02864e-05	194579	72369.9
1032	78	12	10	1.58	0.61	6.2	4	72	0.1	sandy loam	0.2	13	1.0492	1.00123	6.30957e-07	0.01159	1.56676e-10	0.64279	0.8954	0.781742	-6.9077	-8.99585	1654.06	5.94924e-09	1.19611e-07	1.26329e-06	2.49851e-08	2.25157e-07	6.29363e-07	2.398e-06	208507	0.465371	1.34235e-06	267724	34871.6
1033	53	22	25	1.4	0.98	5.1	6	49	0.1	sandy clay loam	0.16	13	1.6856	1.33853	7.94328e-06	0.00980092	2.2481e-07	0.663032	0.902368	0.71843	-6.73686	-8.13038	1116.14	5.11662e-08	1.40279e-07	1.2719e-06	1.21657e-07	2.71002e-06	7.56808e-07	5.56239e-06	89889.5	0.402242	1.02864e-05	194579	72369.9
1034	53	22	25	1.4	0.98	5.1	6	49	0.1	sandy clay loam	0.16	13	1.6856	1.33853	7.94328e-06	0.00980092	2.2481e-07	0.663032	0.902368	0.71843	-6.73686	-8.13038	1116.14	5.11662e-08	1.40279e-07	1.2719e-06	1.21657e-07	2.71002e-06	7.56808e-07	5.56239e-06	89889.5	0.402242	1.02864e-05	194579	72369.9
1035	78	12	10	1.58	0.61	6.2	4	72	0.1	sandy loam	0.2	13	1.0492	1.00123	6.30957e-07	0.01159	1.56676e-10	0.64279	0.8954	0.781742	-6.9077	-8.99585	1654.06	5.94924e-09	1.19611e-07	1.26329e-06	2.49851e-08	2.25157e-07	6.29363e-07	2.398e-06	208507	0.465371	1.34235e-06	267724	34871.6
1036	53	22	25	1.4	0.98	5.1	6	49	0.1	sandy clay loam	0.16	13	1.6856	1.33853	7.94328e-06	0.00980092	2.2481e-07	0.663032	0.902368	0.71843	-6.73686	-8.13038	1116.14	5.11662e-08	1.40279e-07	1.2719e-06	1.21657e-07	2.71002e-06	7.56808e-07	5.56239e-06	89889.5	0.402242	1.02864e-05	194579	72369.9
1037	53	22	25	1.4	0.98	5.1	6	49	0.1	sandy clay loam	0.16	13	1.6856	1.33853	7.94328e-06	0.00980092	2.2481e-07	0.663032	0.902368	0.71843	-6.73686	-8.13038	1116.14	5.11662e-08	1.40279e-07	1.2719e-06	1.21657e-07	2.71002e-06	7.56808e-07	5.56239e-06	89889.5	0.402242	1.02864e-05	194579	72369.9
1038	53	22	25	1.4	0.98	5.1	6	49	0.1	sandy clay loam	0.16	13	1.6856	1.33853	7.94328e-06	0.00980092	2.2481e-07	0.663032	0.902368	0.71843	-6.73686	-8.13038	1116.14	5.11662e-08	1.40279e-07	1.2719e-06	1.21657e-07	2.71002e-06	7.56808e-07	5.56239e-06	89889.5	0.402242	1.02864e-05	194579	72369.9
1039	53	22	25	1.4	0.98	5.1	6	49	0.1	sandy clay loam	0.16	13	1.6856	1.33853	7.94328e-06	0.00980092	2.2481e-07	0.663032	0.902368	0.71843	-6.73686	-8.13038	1116.14	5.11662e-08	1.40279e-07	1.2719e-06	1.21657e-07	2.71002e-06	7.56808e-07	5.56239e-06	89889.5	0.402242	1.02864e-05	194579	72369.9
1040	53	22	25	1.4	0.98	5.1	6	49	0.1	sandy clay loam	0.16	13	1.6856	1.33853	7.94328e-06	0.00980092	2.2481e-07	0.663032	0.902368	0.71843	-6.73686	-8.13038	1116.14	5.11662e-08	1.40279e-07	1.2719e-06	1.21657e-07	2.71002e-06	7.56808e-07	5.56239e-06	89889.5	0.402242	1.02864e-05	194579	72369.9
1041	53	22	25	1.4	0.98	5.1	6	49	0.1	sandy clay loam	0.16	13	1.6856	1.33853	7.94328e-06	0.00980092	2.2481e-07	0.663032	0.902368	0.71843	-6.73686	-8.13038	1116.14	5.11662e-08	1.40279e-07	1.2719e-06	1.21657e-07	2.71002e-06	7.56808e-07	5.56239e-06	89889.5	0.402242	1.02864e-05	194579	72369.9
1043	78	12	10	1.58	0.61	6.2	4	72	0.1	sandy loam	0.2	13	1.0492	1.00123	6.30957e-07	0.01159	1.56676e-10	0.64279	0.8954	0.781742	-6.9077	-8.99585	1654.06	5.94924e-09	1.19611e-07	1.26329e-06	2.49851e-08	2.25157e-07	6.29363e-07	2.398e-06	208507	0.465371	1.34235e-06	267724	34871.6
1045	49	27	24	1.4	1	4.6	7	44	0.1	sandy clay loam	0.16	13	1.72	1.42994	2.51189e-05	0.0091147	2.11533e-05	0.671608	0.905272	0.721664	-6.66517	-7.63557	946.295	1.57375e-07	1.88826e-07	1.29214e-06	3.48727e-07	8.5466e-06	1.05671e-06	1.06459e-05	46966.4	0.405248	3.19038e-05	169085	102673
1046	49	27	24	1.4	1	4.6	7	44	0.1	sandy clay loam	0.16	13	1.72	1.42994	2.51189e-05	0.0091147	2.11533e-05	0.671608	0.905272	0.721664	-6.66517	-7.63557	946.295	1.57375e-07	1.88826e-07	1.29214e-06	3.48727e-07	8.5466e-06	1.05671e-06	1.06459e-05	46966.4	0.405248	3.19038e-05	169085	102673
1047	49	27	24	1.4	1	4.6	7	44	0.1	sandy clay loam	0.16	13	1.72	1.42994	2.51189e-05	0.0091147	2.11533e-05	0.671608	0.905272	0.721664	-6.66517	-7.63557	946.295	1.57375e-07	1.88826e-07	1.29214e-06	3.48727e-07	8.5466e-06	1.05671e-06	1.06459e-05	46966.4	0.405248	3.19038e-05	169085	102673
1048	81	9	10	1.59	0.55	5.5	4	68	0.1	loamy sand	0.17	13	0.946	1.0874	3.16228e-06	0.00505528	3.57032e-06	0.736475	0.926381	0.780708	-6.82765	-8.25667	1375.64	2.16021e-08	1.26766e-07	1.26627e-06	5.84503e-08	1.08535e-06	6.73576e-07	3.37422e-06	148182	0.464264	6.23392e-06	231221	99163.1
1049	49	27	24	1.4	1	4.6	7	44	0.1	sandy clay loam	0.16	13	1.72	1.42994	2.51189e-05	0.0091147	2.11533e-05	0.671608	0.905272	0.721664	-6.66517	-7.63557	946.295	1.57375e-07	1.88826e-07	1.29214e-06	3.48727e-07	8.5466e-06	1.05671e-06	1.06459e-05	46966.4	0.405248	3.19038e-05	169085	102673
1050	49	27	24	1.4	1	4.6	7	44	0.1	sandy clay loam	0.16	13	1.72	1.42994	2.51189e-05	0.0091147	2.11533e-05	0.671608	0.905272	0.721664	-6.66517	-7.63557	946.295	1.57375e-07	1.88826e-07	1.29214e-06	3.48727e-07	8.5466e-06	1.05671e-06	1.06459e-05	46966.4	0.405248	3.19038e-05	169085	102673
1051	49	27	24	1.4	1	4.6	7	44	0.1	sandy clay loam	0.16	13	1.72	1.42994	2.51189e-05	0.0091147	2.11533e-05	0.671608	0.905272	0.721664	-6.66517	-7.63557	946.295	1.57375e-07	1.88826e-07	1.29214e-06	3.48727e-07	8.5466e-06	1.05671e-06	1.06459e-05	46966.4	0.405248	3.19038e-05	169085	102673
1052	49	27	24	1.4	1	4.6	7	44	0.1	sandy clay loam	0.16	13	1.72	1.42994	2.51189e-05	0.0091147	2.11533e-05	0.671608	0.905272	0.721664	-6.66517	-7.63557	946.295	1.57375e-07	1.88826e-07	1.29214e-06	3.48727e-07	8.5466e-06	1.05671e-06	1.06459e-05	46966.4	0.405248	3.19038e-05	169085	102673
1053	49	27	24	1.4	1	4.6	7	44	0.1	sandy clay loam	0.16	13	1.72	1.42994	2.51189e-05	0.0091147	2.11533e-05	0.671608	0.905272	0.721664	-6.66517	-7.63557	946.295	1.57375e-07	1.88826e-07	1.29214e-06	3.48727e-07	8.5466e-06	1.05671e-06	1.06459e-05	46966.4	0.405248	3.19038e-05	169085	102673
1054	49	27	24	1.4	1	4.6	7	44	0.1	sandy clay loam	0.16	13	1.72	1.42994	2.51189e-05	0.0091147	2.11533e-05	0.671608	0.905272	0.721664	-6.66517	-7.63557	946.295	1.57375e-07	1.88826e-07	1.29214e-06	3.48727e-07	8.5466e-06	1.05671e-06	1.06459e-05	46966.4	0.405248	3.19038e-05	169085	102673
1055	49	27	24	1.4	1	4.6	7	44	0.1	sandy clay loam	0.16	13	1.72	1.42994	2.51189e-05	0.0091147	2.11533e-05	0.671608	0.905272	0.721664	-6.66517	-7.63557	946.295	1.57375e-07	1.88826e-07	1.29214e-06	3.48727e-07	8.5466e-06	1.05671e-06	1.06459e-05	46966.4	0.405248	3.19038e-05	169085	102673
1056	81	9	10	1.59	0.55	5.5	4	68	0.1	loamy sand	0.17	13	0.946	1.0874	3.16228e-06	0.00505528	3.57032e-06	0.736475	0.926381	0.780708	-6.82765	-8.25667	1375.64	2.16021e-08	1.26766e-07	1.26627e-06	5.84503e-08	1.08535e-06	6.73576e-07	3.37422e-06	148182	0.464264	6.23392e-06	231221	99163.1
1057	49	27	24	1.4	1	4.6	7	44	0.1	sandy clay loam	0.16	13	1.72	1.42994	2.51189e-05	0.0091147	2.11533e-05	0.671608	0.905272	0.721664	-6.66517	-7.63557	946.295	1.57375e-07	1.88826e-07	1.29214e-06	3.48727e-07	8.5466e-06	1.05671e-06	1.06459e-05	46966.4	0.405248	3.19038e-05	169085	102673
1058	49	27	24	1.4	1	4.6	7	44	0.1	sandy clay loam	0.16	13	1.72	1.42994	2.51189e-05	0.0091147	2.11533e-05	0.671608	0.905272	0.721664	-6.66517	-7.63557	946.295	1.57375e-07	1.88826e-07	1.29214e-06	3.48727e-07	8.5466e-06	1.05671e-06	1.06459e-05	46966.4	0.405248	3.19038e-05	169085	102673
1059	81	9	10	1.59	0.55	5.5	4	68	0.1	loamy sand	0.17	13	0.946	1.0874	3.16228e-06	0.00505528	3.57032e-06	0.736475	0.926381	0.780708	-6.82765	-8.25667	1375.64	2.16021e-08	1.26766e-07	1.26627e-06	5.84503e-08	1.08535e-06	6.73576e-07	3.37422e-06	148182	0.464264	6.23392e-06	231221	99163.1
1060	81	9	10	1.59	0.55	5.5	4	68	0.1	loamy sand	0.17	13	0.946	1.0874	3.16228e-06	0.00505528	3.57032e-06	0.736475	0.926381	0.780708	-6.82765	-8.25667	1375.64	2.16021e-08	1.26766e-07	1.26627e-06	5.84503e-08	1.08535e-06	6.73576e-07	3.37422e-06	148182	0.464264	6.23392e-06	231221	99163.1
1061	49	27	24	1.4	1	4.6	7	44	0.1	sandy clay loam	0.16	13	1.72	1.42994	2.51189e-05	0.0091147	2.11533e-05	0.671608	0.905272	0.721664	-6.66517	-7.63557	946.295	1.57375e-07	1.88826e-07	1.29214e-06	3.48727e-07	8.5466e-06	1.05671e-06	1.06459e-05	46966.4	0.405248	3.19038e-05	169085	102673
1062	81	9	10	1.59	0.55	5.5	4	68	0.1	loamy sand	0.17	13	0.946	1.0874	3.16228e-06	0.00505528	3.57032e-06	0.736475	0.926381	0.780708	-6.82765	-8.25667	1375.64	2.16021e-08	1.26766e-07	1.26627e-06	5.84503e-08	1.08535e-06	6.73576e-07	3.37422e-06	148182	0.464264	6.23392e-06	231221	99163.1
1063	49	27	24	1.4	1	4.6	7	44	0.1	sandy clay loam	0.16	13	1.72	1.42994	2.51189e-05	0.0091147	2.11533e-05	0.671608	0.905272	0.721664	-6.66517	-7.63557	946.295	1.57375e-07	1.88826e-07	1.29214e-06	3.48727e-07	8.5466e-06	1.05671e-06	1.06459e-05	46966.4	0.405248	3.19038e-05	169085	102673
1064	49	27	24	1.4	1	4.6	7	44	0.1	sandy clay loam	0.16	13	1.72	1.42994	2.51189e-05	0.0091147	2.11533e-05	0.671608	0.905272	0.721664	-6.66517	-7.63557	946.295	1.57375e-07	1.88826e-07	1.29214e-06	3.48727e-07	8.5466e-06	1.05671e-06	1.06459e-05	46966.4	0.405248	3.19038e-05	169085	102673
1066	49	27	24	1.4	1	4.6	7	44	0.1	sandy clay loam	0.16	13	1.72	1.42994	2.51189e-05	0.0091147	2.11533e-05	0.671608	0.905272	0.721664	-6.66517	-7.63557	946.295	1.57375e-07	1.88826e-07	1.29214e-06	3.48727e-07	8.5466e-06	1.05671e-06	1.06459e-05	46966.4	0.405248	3.19038e-05	169085	102673
1067	49	27	24	1.4	1	4.6	7	44	0.1	sandy clay loam	0.16	13	1.72	1.42994	2.51189e-05	0.0091147	2.11533e-05	0.671608	0.905272	0.721664	-6.66517	-7.63557	946.295	1.57375e-07	1.88826e-07	1.29214e-06	3.48727e-07	8.5466e-06	1.05671e-06	1.06459e-05	46966.4	0.405248	3.19038e-05	169085	102673
1068	77	12	11	1.57	0.56	5.2	3	59	0.1	sandy loam	0.2	13	0.9632	1.14411	6.30957e-06	0.000462305	1.18022e-07	0.9061	0.97565	0.77381	-6.78918	-7.96922	1259.02	4.10639e-08	1.35661e-07	1.26998e-06	1.00059e-07	2.15485e-06	7.28333e-07	4.514e-06	110767	0.456948	1.4628e-05	215084	159246
1069	47	30	23	1.4	1.13	4.8	6	54	0.1	loam	0.32	23	1.9436	1.43468	1.58489e-05	0.00658977	4.9024e-07	0.708402	0.917424	1.01149	-6.50239	-7.64805	1150.87	1.00052e-07	1.62624e-07	1.28122e-06	2.26173e-07	5.39649e-06	8.94594e-07	1.52813e-05	32719.7	0.446442	3.18101e-05	199640	92765.5
1070	47	30	23	1.4	1.13	4.8	6	54	0.1	loam	0.32	23	1.9436	1.43468	1.58489e-05	0.00658977	4.9024e-07	0.708402	0.917424	1.01149	-6.50239	-7.64805	1150.87	1.00052e-07	1.62624e-07	1.28122e-06	2.26173e-07	5.39649e-06	8.94594e-07	1.52813e-05	32719.7	0.446442	3.18101e-05	199640	92765.5
1071	47	30	23	1.4	1.13	4.8	6	54	0.1	loam	0.32	23	1.9436	1.43468	1.58489e-05	0.00658977	4.9024e-07	0.708402	0.917424	1.01149	-6.50239	-7.64805	1150.87	1.00052e-07	1.62624e-07	1.28122e-06	2.26173e-07	5.39649e-06	8.94594e-07	1.52813e-05	32719.7	0.446442	3.18101e-05	199640	92765.5
1072	47	30	23	1.4	1.13	4.8	6	54	0.1	loam	0.32	23	1.9436	1.43468	1.58489e-05	0.00658977	4.9024e-07	0.708402	0.917424	1.01149	-6.50239	-7.64805	1150.87	1.00052e-07	1.62624e-07	1.28122e-06	2.26173e-07	5.39649e-06	8.94594e-07	1.52813e-05	32719.7	0.446442	3.18101e-05	199640	92765.5
1074	47	30	23	1.4	1.13	4.8	6	54	0.1	loam	0.32	23	1.9436	1.43468	1.58489e-05	0.00658977	4.9024e-07	0.708402	0.917424	1.01149	-6.50239	-7.64805	1150.87	1.00052e-07	1.62624e-07	1.28122e-06	2.26173e-07	5.39649e-06	8.94594e-07	1.52813e-05	32719.7	0.446442	3.18101e-05	199640	92765.5
1075	77	12	11	1.57	0.56	5.2	3	59	0.1	sandy loam	0.2	13	0.9632	1.14411	6.30957e-06	0.000462305	1.18022e-07	0.9061	0.97565	0.77381	-6.78918	-7.96922	1259.02	4.10639e-08	1.35661e-07	1.26998e-06	1.00059e-07	2.15485e-06	7.28333e-07	4.514e-06	110767	0.456948	1.4628e-05	215084	159246
1081	42	36	22	1.4	1	6.6	16	93	0.1	loam	0.32	23	1.72	1.08994	2.51189e-07	0.13481	0.000188303	0.34105	0.764195	1.01357	-6.75863	-9.39913	2076.18	3.60088e-09	1.18537e-07	1.26284e-06	1.99644e-08	9.61045e-08	6.27828e-07	5.54833e-06	90117.2	0.448586	5.61577e-07	318187	7223.46
1082	42	36	22	1.4	1	6.6	16	93	0.1	loam	0.32	23	1.72	1.08994	2.51189e-07	0.13481	0.000188303	0.34105	0.764195	1.01357	-6.75863	-9.39913	2076.18	3.60088e-09	1.18537e-07	1.26284e-06	1.99644e-08	9.61045e-08	6.27828e-07	5.54833e-06	90117.2	0.448586	5.61577e-07	318187	7223.46
1083	42	36	22	1.4	1	6.6	16	93	0.1	loam	0.32	23	1.72	1.08994	2.51189e-07	0.13481	0.000188303	0.34105	0.764195	1.01357	-6.75863	-9.39913	2076.18	3.60088e-09	1.18537e-07	1.26284e-06	1.99644e-08	9.61045e-08	6.27828e-07	5.54833e-06	90117.2	0.448586	5.61577e-07	318187	7223.46
1084	42	36	22	1.4	1	6.6	16	93	0.1	loam	0.32	23	1.72	1.08994	2.51189e-07	0.13481	0.000188303	0.34105	0.764195	1.01357	-6.75863	-9.39913	2076.18	3.60088e-09	1.18537e-07	1.26284e-06	1.99644e-08	9.61045e-08	6.27828e-07	5.54833e-06	90117.2	0.448586	5.61577e-07	318187	7223.46
1085	42	36	22	1.4	1	6.6	16	93	0.1	loam	0.32	23	1.72	1.08994	2.51189e-07	0.13481	0.000188303	0.34105	0.764195	1.01357	-6.75863	-9.39913	2076.18	3.60088e-09	1.18537e-07	1.26284e-06	1.99644e-08	9.61045e-08	6.27828e-07	5.54833e-06	90117.2	0.448586	5.61577e-07	318187	7223.46
1086	42	36	22	1.4	1	6.6	16	93	0.1	loam	0.32	23	1.72	1.08994	2.51189e-07	0.13481	0.000188303	0.34105	0.764195	1.01357	-6.75863	-9.39913	2076.18	3.60088e-09	1.18537e-07	1.26284e-06	1.99644e-08	9.61045e-08	6.27828e-07	5.54833e-06	90117.2	0.448586	5.61577e-07	318187	7223.46
1089	42	36	22	1.4	1	6.6	16	93	0.1	loam	0.32	23	1.72	1.08994	2.51189e-07	0.13481	0.000188303	0.34105	0.764195	1.01357	-6.75863	-9.39913	2076.18	3.60088e-09	1.18537e-07	1.26284e-06	1.99644e-08	9.61045e-08	6.27828e-07	5.54833e-06	90117.2	0.448586	5.61577e-07	318187	7223.46
1090	42	36	22	1.4	1	6.6	16	93	0.1	loam	0.32	23	1.72	1.08994	2.51189e-07	0.13481	0.000188303	0.34105	0.764195	1.01357	-6.75863	-9.39913	2076.18	3.60088e-09	1.18537e-07	1.26284e-06	1.99644e-08	9.61045e-08	6.27828e-07	5.54833e-06	90117.2	0.448586	5.61577e-07	318187	7223.46
1091	42	36	22	1.4	1	6.6	16	93	0.1	loam	0.32	23	1.72	1.08994	2.51189e-07	0.13481	0.000188303	0.34105	0.764195	1.01357	-6.75863	-9.39913	2076.18	3.60088e-09	1.18537e-07	1.26284e-06	1.99644e-08	9.61045e-08	6.27828e-07	5.54833e-06	90117.2	0.448586	5.61577e-07	318187	7223.46
1092	42	36	22	1.4	1	6.6	16	93	0.1	loam	0.32	23	1.72	1.08994	2.51189e-07	0.13481	0.000188303	0.34105	0.764195	1.01357	-6.75863	-9.39913	2076.18	3.60088e-09	1.18537e-07	1.26284e-06	1.99644e-08	9.61045e-08	6.27828e-07	5.54833e-06	90117.2	0.448586	5.61577e-07	318187	7223.46
1093	42	36	22	1.4	1	6.6	16	93	0.1	loam	0.32	23	1.72	1.08994	2.51189e-07	0.13481	0.000188303	0.34105	0.764195	1.01357	-6.75863	-9.39913	2076.18	3.60088e-09	1.18537e-07	1.26284e-06	1.99644e-08	9.61045e-08	6.27828e-07	5.54833e-06	90117.2	0.448586	5.61577e-07	318187	7223.46
1094	42	36	22	1.4	1	6.6	16	93	0.1	loam	0.32	23	1.72	1.08994	2.51189e-07	0.13481	0.000188303	0.34105	0.764195	1.01357	-6.75863	-9.39913	2076.18	3.60088e-09	1.18537e-07	1.26284e-06	1.99644e-08	9.61045e-08	6.27828e-07	5.54833e-06	90117.2	0.448586	5.61577e-07	303096	6880.86
1095	42	36	22	1.4	1	6.6	16	93	0.1	loam	0.32	23	1.72	1.08994	2.51189e-07	0.13481	0.000188303	0.34105	0.764195	1.01357	-6.75863	-9.39913	2076.18	3.60088e-09	1.18537e-07	1.26284e-06	1.99644e-08	9.61045e-08	6.27828e-07	5.54833e-06	90117.2	0.448586	5.61577e-07	303096	6880.86
1097	26	24	50	1.25	1.15	4.9	10	58	0.1	clay (light)	0.2	24	1.978	1.42325	1.25893e-05	0.02679	1.69087e-05	0.535056	0.855263	0.975293	-6.53528	-7.78416	1295.38	7.98957e-08	1.53411e-07	1.27738e-06	1.8308e-07	4.28882e-06	8.38229e-07	1.10805e-05	45124.3	0.393624	1.76913e-05	220172	69185.4
1098	52	25	23	1.41	0.95	4.7	6	39	0.1	sandy clay loam	0.16	13	1.634	1.39667	1.99526e-05	0.00613307	2.9035e-06	0.716192	0.919936	0.724312	-6.68362	-7.7136	987.363	1.25428e-07	1.74223e-07	1.28605e-06	2.80426e-07	6.791e-06	9.66178e-07	8.6651e-06	57702.8	0.407726	2.63072e-05	175365	108538
1099	52	25	23	1.41	0.95	4.7	6	39	0.1	sandy clay loam	0.16	13	1.634	1.39667	1.99526e-05	0.00613307	2.9035e-06	0.716192	0.919936	0.724312	-6.68362	-7.7136	987.363	1.25428e-07	1.74223e-07	1.28605e-06	2.80426e-07	6.791e-06	9.66178e-07	8.6651e-06	57702.8	0.407726	2.63072e-05	175365	108538
1100	52	25	23	1.41	0.95	4.7	6	39	0.1	sandy clay loam	0.16	13	1.634	1.39667	1.99526e-05	0.00613307	2.9035e-06	0.716192	0.919936	0.724312	-6.68362	-7.7136	987.363	1.25428e-07	1.74223e-07	1.28605e-06	2.80426e-07	6.791e-06	9.66178e-07	8.6651e-06	57702.8	0.407726	2.63072e-05	175365	108538
1101	52	25	23	1.41	0.95	4.7	6	39	0.1	sandy clay loam	0.16	13	1.634	1.39667	1.99526e-05	0.00613307	2.9035e-06	0.716192	0.919936	0.724312	-6.68362	-7.7136	987.363	1.25428e-07	1.74223e-07	1.28605e-06	2.80426e-07	6.791e-06	9.66178e-07	8.6651e-06	57702.8	0.407726	2.63072e-05	175365	108538
1102	52	25	23	1.41	0.95	4.7	6	39	0.1	sandy clay loam	0.16	13	1.634	1.39667	1.99526e-05	0.00613307	2.9035e-06	0.716192	0.919936	0.724312	-6.68362	-7.7136	987.363	1.25428e-07	1.74223e-07	1.28605e-06	2.80426e-07	6.791e-06	9.66178e-07	8.6651e-06	57702.8	0.407726	2.63072e-05	175365	108538
1103	52	25	23	1.41	0.95	4.7	6	39	0.1	sandy clay loam	0.16	13	1.634	1.39667	1.99526e-05	0.00613307	2.9035e-06	0.716192	0.919936	0.724312	-6.68362	-7.7136	987.363	1.25428e-07	1.74223e-07	1.28605e-06	2.80426e-07	6.791e-06	9.66178e-07	8.6651e-06	57702.8	0.407726	2.63072e-05	175365	108538
1104	52	25	23	1.41	0.95	4.7	6	39	0.1	sandy clay loam	0.16	13	1.634	1.39667	1.99526e-05	0.00613307	2.9035e-06	0.716192	0.919936	0.724312	-6.68362	-7.7136	987.363	1.25428e-07	1.74223e-07	1.28605e-06	2.80426e-07	6.791e-06	9.66178e-07	8.6651e-06	57702.8	0.407726	2.63072e-05	175365	108538
1105	52	25	23	1.41	0.95	4.7	6	39	0.1	sandy clay loam	0.16	13	1.634	1.39667	1.99526e-05	0.00613307	2.9035e-06	0.716192	0.919936	0.724312	-6.68362	-7.7136	987.363	1.25428e-07	1.74223e-07	1.28605e-06	2.80426e-07	6.791e-06	9.66178e-07	8.6651e-06	57702.8	0.407726	2.63072e-05	175365	108538
1106	52	25	23	1.41	0.95	4.7	6	39	0.1	sandy clay loam	0.16	13	1.634	1.39667	1.99526e-05	0.00613307	2.9035e-06	0.716192	0.919936	0.724312	-6.68362	-7.7136	987.363	1.25428e-07	1.74223e-07	1.28605e-06	2.80426e-07	6.791e-06	9.66178e-07	8.6651e-06	57702.8	0.407726	2.63072e-05	175365	108538
1107	44	36	20	1.41	0.97	6.5	11	90	0.1	loam	0.32	23	1.6684	1.09728	3.16228e-07	0.07013	8.02552e-05	0.411424	0.800889	1.02035	-6.74506	-9.28187	2012.31	4.00306e-09	1.18721e-07	1.26292e-06	2.08242e-08	1.18206e-07	6.26045e-07	4.87865e-06	102487	0.455637	7.19125e-07	310899	10440.3
1108	44	36	20	1.41	0.97	6.5	11	90	0.1	loam	0.32	23	1.6684	1.09728	3.16228e-07	0.07013	8.02552e-05	0.411424	0.800889	1.02035	-6.74506	-9.28187	2012.31	4.00306e-09	1.18721e-07	1.26292e-06	2.08242e-08	1.18206e-07	6.26045e-07	4.87865e-06	102487	0.455637	7.19125e-07	310899	10440.3
1109	41	36	23	1.39	2.72	5.2	21	24	0.1	loam	0.32	23	4.6784	1.64517	6.30957e-06	0.10286	1.93617e-06	0.368018	0.778874	1.02027	-6.43765	-8.38047	991.499	4.10639e-08	1.35661e-07	1.26998e-06	1.00059e-07	2.15485e-06	7.28382e-07	1.77825e-05	28117.5	0.455554	5.81413e-06	175994	13106.8
1139	75	13	12	1.55	0.7	6.4	7	88	0.1	sandy loam	0.2	13	1.204	1.01086	3.98107e-07	0.03906	5.08807e-05	0.485326	0.834658	0.769577	-6.92412	-9.2589	1717.82	4.50937e-09	1.18953e-07	1.26301e-06	2.19067e-08	1.4603e-07	6.26679e-07	2.75578e-06	181437	0.452516	7.67906e-07	275707	17382.6
1156	22	18	60	1.21	2.93	4.9	13	13	0.1	clay (light)	0.2	24	5.0396	1.71975	1.25893e-05	0.04381	2.14899e-11	0.470378	0.828155	0.971095	-6.41728	-8.14905	987.203	7.98957e-08	1.53411e-07	1.27738e-06	1.8308e-07	4.28882e-06	8.37773e-07	1.26029e-05	39673.3	0.389837	7.96509e-06	175341	21600.1
1157	53	20	27	1.39	2.34	4.8	8	20	0.1	sandy clay loam	0.16	13	4.0248	1.66546	1.58489e-05	0.01715	3.29427e-11	0.59346	0.877703	0.721409	-6.58264	-8.16438	782.516	1.00052e-07	1.62624e-07	1.28122e-06	2.26173e-07	5.39649e-06	8.94581e-07	9.12049e-06	54821.6	0.40501	9.51485e-06	143269	30267.1
1158	53	20	27	1.39	2.34	4.8	8	20	0.1	sandy clay loam	0.16	13	4.0248	1.66546	1.58489e-05	0.01715	3.29427e-11	0.59346	0.877703	0.721409	-6.58264	-8.16438	782.516	1.00052e-07	1.62624e-07	1.28122e-06	2.26173e-07	5.39649e-06	8.94581e-07	9.12049e-06	54821.6	0.40501	9.51485e-06	143269	30267.1
1159	22	18	60	1.21	2.93	4.9	13	13	0.1	clay (light)	0.2	24	5.0396	1.71975	1.25893e-05	0.04381	2.14899e-11	0.470378	0.828155	0.971095	-6.41728	-8.14905	987.203	7.98957e-08	1.53411e-07	1.27738e-06	1.8308e-07	4.28882e-06	8.37773e-07	1.26029e-05	39673.3	0.389837	7.96509e-06	175341	21600.1
1160	60	14	26	1.41	1.06	5	6	38	0.1	sandy clay loam	0.16	13	1.8232	1.38041	1e-05	0.0097157	1.11868e-07	0.66407	0.902721	0.716301	-6.7146	-8.06244	1060.37	6.38843e-08	1.46092e-07	1.27433e-06	1.48848e-07	3.40893e-06	7.9265e-07	6.28471e-06	79558.2	0.400275	1.20018e-05	186345	71221.2
1161	60	14	26	1.41	1.06	5	6	38	0.1	sandy clay loam	0.16	13	1.8232	1.38041	1e-05	0.0097157	1.11868e-07	0.66407	0.902721	0.716301	-6.7146	-8.06244	1060.37	6.38843e-08	1.46092e-07	1.27433e-06	1.48848e-07	3.40893e-06	7.9265e-07	6.28471e-06	79558.2	0.400275	1.20018e-05	186345	71221.2
1162	60	14	26	1.41	1.06	5	6	38	0.1	sandy clay loam	0.16	13	1.8232	1.38041	1e-05	0.0097157	1.11868e-07	0.66407	0.902721	0.716301	-6.7146	-8.06244	1060.37	6.38843e-08	1.46092e-07	1.27433e-06	1.48848e-07	3.40893e-06	7.9265e-07	6.28471e-06	79558.2	0.400275	1.20018e-05	186345	71221.2
1163	77	9	14	1.53	0.58	4.8	3	36	0.1	sandy loam	0.2	13	0.9976	1.22324	1.58489e-05	0.000144057	2.84931e-07	0.9458	0.986165	0.756251	-6.74147	-7.59701	1128.04	1.00052e-07	1.62624e-07	1.28122e-06	2.26173e-07	5.39649e-06	8.94589e-07	7.15353e-06	69895.5	0.438841	3.6827e-05	196319	221761
1166	60	14	26	1.41	1.06	5	6	38	0.1	sandy clay loam	0.16	13	1.8232	1.38041	1e-05	0.0097157	1.11868e-07	0.66407	0.902721	0.716301	-6.7146	-8.06244	1060.37	6.38843e-08	1.46092e-07	1.27433e-06	1.48848e-07	3.40893e-06	7.9265e-07	6.28471e-06	79558.2	0.400275	1.20018e-05	186345	71221.2
1167	60	14	26	1.41	1.06	5	6	38	0.1	sandy clay loam	0.16	13	1.8232	1.38041	1e-05	0.0097157	1.11868e-07	0.66407	0.902721	0.716301	-6.7146	-8.06244	1060.37	6.38843e-08	1.46092e-07	1.27433e-06	1.48848e-07	3.40893e-06	7.9265e-07	6.28471e-06	79558.2	0.400275	1.20018e-05	186345	71221.2
1168	60	14	26	1.41	1.06	5	6	38	0.1	sandy clay loam	0.16	13	1.8232	1.38041	1e-05	0.0097157	1.11868e-07	0.66407	0.902721	0.716301	-6.7146	-8.06244	1060.37	6.38843e-08	1.46092e-07	1.27433e-06	1.48848e-07	3.40893e-06	7.9265e-07	6.28471e-06	79558.2	0.400275	1.20018e-05	186345	71221.2
1169	60	14	26	1.41	1.06	5	6	38	0.1	sandy clay loam	0.16	13	1.8232	1.38041	1e-05	0.0097157	1.11868e-07	0.66407	0.902721	0.716301	-6.7146	-8.06244	1060.37	6.38843e-08	1.46092e-07	1.27433e-06	1.48848e-07	3.40893e-06	7.9265e-07	6.28471e-06	79558.2	0.400275	1.20018e-05	186345	71221.2
1170	77	9	14	1.53	0.58	4.8	3	36	0.1	sandy loam	0.2	13	0.9976	1.22324	1.58489e-05	0.000144057	2.84931e-07	0.9458	0.986165	0.756251	-6.74147	-7.59701	1128.04	1.00052e-07	1.62624e-07	1.28122e-06	2.26173e-07	5.39649e-06	8.94589e-07	7.15353e-06	69895.5	0.438841	3.6827e-05	196319	221761
1171	60	14	26	1.41	1.06	5	6	38	0.1	sandy clay loam	0.16	13	1.8232	1.38041	1e-05	0.0097157	1.11868e-07	0.66407	0.902721	0.716301	-6.7146	-8.06244	1060.37	6.38843e-08	1.46092e-07	1.27433e-06	1.48848e-07	3.40893e-06	7.9265e-07	6.28471e-06	79558.2	0.400275	1.20018e-05	186345	71221.2
1172	60	14	26	1.41	1.06	5	6	38	0.1	sandy clay loam	0.16	13	1.8232	1.38041	1e-05	0.0097157	1.11868e-07	0.66407	0.902721	0.716301	-6.7146	-8.06244	1060.37	6.38843e-08	1.46092e-07	1.27433e-06	1.48848e-07	3.40893e-06	7.9265e-07	6.28471e-06	79558.2	0.400275	1.20018e-05	186345	71221.2
1173	28	20	52	1.24	1.65	4.9	9	24	0.1	clay (light)	0.2	24	2.838	1.5377	1.25893e-05	0.022	8.40027e-10	0.561029	0.865459	0.975986	-6.48834	-7.92313	1162.69	7.98957e-08	1.53411e-07	1.27738e-06	1.8308e-07	4.28882e-06	8.37773e-07	1.05665e-05	47319.1	0.394253	1.29293e-05	201351	48567.1
1174	60	14	26	1.41	1.06	5	6	38	0.1	sandy clay loam	0.16	13	1.8232	1.38041	1e-05	0.0097157	1.11868e-07	0.66407	0.902721	0.716301	-6.7146	-8.06244	1060.37	6.38843e-08	1.46092e-07	1.27433e-06	1.48848e-07	3.40893e-06	7.9265e-07	6.28471e-06	79558.2	0.400275	1.20018e-05	186345	71221.2
1175	57	15	28	1.39	0.98	4.7	5	44	0.1	sandy clay loam	0.16	13	1.6856	1.40653	1.99526e-05	0.0033835	8.95818e-08	0.775353	0.938372	0.710014	-6.68819	-7.7372	997.814	1.25428e-07	1.74223e-07	1.28605e-06	2.80426e-07	6.791e-06	9.66103e-07	8.00383e-06	62470.1	0.394522	2.61203e-05	176952	113913
1177	57	15	28	1.39	0.98	4.7	5	44	0.1	sandy clay loam	0.16	13	1.6856	1.40653	1.99526e-05	0.0033835	8.95818e-08	0.775353	0.938372	0.710014	-6.68819	-7.7372	997.814	1.25428e-07	1.74223e-07	1.28605e-06	2.80426e-07	6.791e-06	9.66103e-07	8.00383e-06	62470.1	0.394522	2.61203e-05	176952	113913
1179	57	15	28	1.39	0.98	4.7	5	44	0.1	sandy clay loam	0.16	13	1.6856	1.40653	1.99526e-05	0.0033835	8.95818e-08	0.775353	0.938372	0.710014	-6.68819	-7.7372	997.814	1.25428e-07	1.74223e-07	1.28605e-06	2.80426e-07	6.791e-06	9.66103e-07	8.00383e-06	62470.1	0.394522	2.61203e-05	176952	113913
1180	57	15	28	1.39	0.98	4.7	5	44	0.1	sandy clay loam	0.16	13	1.6856	1.40653	1.99526e-05	0.0033835	8.95818e-08	0.775353	0.938372	0.710014	-6.68819	-7.7372	997.814	1.25428e-07	1.74223e-07	1.28605e-06	2.80426e-07	6.791e-06	9.66103e-07	8.00383e-06	62470.1	0.394522	2.61203e-05	176952	113913
1181	57	15	28	1.39	0.98	4.7	5	44	0.1	sandy clay loam	0.16	13	1.6856	1.40653	1.99526e-05	0.0033835	8.95818e-08	0.775353	0.938372	0.710014	-6.68819	-7.7372	997.814	1.25428e-07	1.74223e-07	1.28605e-06	2.80426e-07	6.791e-06	9.66103e-07	8.00383e-06	62470.1	0.394522	2.61203e-05	176952	113913
1183	62	12	26	1.41	0.68	5.4	5	75	0.1	sandy clay loam	0.16	13	1.1696	1.17167	3.98107e-06	0.00848936	3.83237e-07	0.679888	0.908049	0.711867	-6.82818	-8.29444	1377.33	2.66652e-08	1.2908e-07	1.26723e-06	6.92751e-08	1.36359e-06	6.87759e-07	3.83263e-06	130459	0.396209	7.10689e-06	231452	85023.1
1184	79	7	14	1.54	0.7	4.8	3	29	0.1	sandy loam	0.2	13	1.204	1.28286	1.58489e-05	0.000156125	2.28111e-08	0.943674	0.985611	0.758129	-6.71611	-7.66817	1064.06	1.00052e-07	1.62624e-07	1.28122e-06	2.26173e-07	5.39649e-06	8.94582e-07	7.16964e-06	69738.5	0.440743	3.09239e-05	186895	177644
1185	79	7	14	1.54	0.7	4.8	3	29	0.1	sandy loam	0.2	13	1.204	1.28286	1.58489e-05	0.000156125	2.28111e-08	0.943674	0.985611	0.758129	-6.71611	-7.66817	1064.06	1.00052e-07	1.62624e-07	1.28122e-06	2.26173e-07	5.39649e-06	8.94582e-07	7.16964e-06	69738.5	0.440743	3.09239e-05	186895	177644
1187	64	12	24	1.43	0.73	4.6	5	44	0.1	sandy clay loam	0.16	13	1.2556	1.33016	2.51189e-05	0.00295642	8.78748e-06	0.787414	0.942	0.71852	-6.70761	-7.51648	1043.43	1.57375e-07	1.88826e-07	1.29214e-06	3.48727e-07	8.5466e-06	1.05638e-06	9.07971e-06	55067.8	0.402325	4.1388e-05	183819	168554
1188	64	12	24	1.43	0.73	4.6	5	44	0.1	sandy clay loam	0.16	13	1.2556	1.33016	2.51189e-05	0.00295642	8.78748e-06	0.787414	0.942	0.71852	-6.70761	-7.51648	1043.43	1.57375e-07	1.88826e-07	1.29214e-06	3.48727e-07	8.5466e-06	1.05638e-06	9.07971e-06	55067.8	0.402325	4.1388e-05	183819	168554
1189	32	14	54	1.25	1.63	4.4	8	13	0.1	clay (light)	0.2	24	2.8036	1.61883	3.98107e-05	0.01283	1.3105e-08	0.630244	0.890999	0.973061	-6.42452	-7.42079	1003.78	2.48224e-07	2.30352e-07	1.30945e-06	5.42959e-07	1.35391e-05	1.31219e-06	1.9101e-05	26176.7	0.391607	4.10542e-05	177855	74849.6
1190	79	7	14	1.54	0.7	4.8	3	29	0.1	sandy loam	0.2	13	1.204	1.28286	1.58489e-05	0.000156125	2.28111e-08	0.943674	0.985611	0.758129	-6.71611	-7.66817	1064.06	1.00052e-07	1.62624e-07	1.28122e-06	2.26173e-07	5.39649e-06	8.94582e-07	7.16964e-06	69738.5	0.440743	3.09239e-05	186895	177644
1191	38	40	22	1.39	1.27	5.8	12	82	0.1	loam	0.32	23	2.1844	1.30171	1.58489e-06	0.06146	0.000177095	0.427468	0.808585	1.01596	-6.61895	-8.68958	1505.2	1.1848e-08	1.22307e-07	1.26441e-06	3.75965e-08	5.4932e-07	6.50769e-07	8.11396e-06	61622.2	0.451059	2.88193e-06	248551	19909.9
1192	16	31	53	1.22	1.56	5.5	25	73	0.1	clay (light)	0.2	24	2.6832	1.41792	3.16228e-06	0.16742	0.000986343	0.322256	0.753443	0.974011	-6.57733	-8.50305	1427.11	2.16021e-08	1.26766e-07	1.26627e-06	5.84503e-08	1.08535e-06	7.00103e-07	9.13077e-06	54759.9	0.392464	3.47291e-06	238179	17777
1193	38	40	22	1.39	1.27	5.8	12	82	0.1	loam	0.32	23	2.1844	1.30171	1.58489e-06	0.06146	0.000177095	0.427468	0.808585	1.01596	-6.61895	-8.68958	1505.2	1.1848e-08	1.22307e-07	1.26441e-06	3.75965e-08	5.4932e-07	6.50769e-07	8.11396e-06	61622.2	0.451059	2.88193e-06	248551	19909.9
1194	16	31	53	1.22	1.56	5.5	25	73	0.1	clay (light)	0.2	24	2.6832	1.41792	3.16228e-06	0.16742	0.000986343	0.322256	0.753443	0.974011	-6.57733	-8.50305	1427.11	2.16021e-08	1.26766e-07	1.26627e-06	5.84503e-08	1.08535e-06	7.00103e-07	9.13077e-06	54759.9	0.392464	3.47291e-06	238179	17777
1196	38	40	22	1.39	1.27	5.8	12	82	0.1	loam	0.32	23	2.1844	1.30171	1.58489e-06	0.06146	0.000177095	0.427468	0.808585	1.01596	-6.61895	-8.68958	1505.2	1.1848e-08	1.22307e-07	1.26441e-06	3.75965e-08	5.4932e-07	6.50769e-07	8.11396e-06	61622.2	0.451059	2.88193e-06	248551	19909.9
1197	38	40	22	1.39	1.27	5.8	12	82	0.1	loam	0.32	23	2.1844	1.30171	1.58489e-06	0.06146	0.000177095	0.427468	0.808585	1.01596	-6.61895	-8.68958	1505.2	1.1848e-08	1.22307e-07	1.26441e-06	3.75965e-08	5.4932e-07	6.50769e-07	8.11396e-06	61622.2	0.451059	2.88193e-06	248551	19909.9
1198	38	40	22	1.39	1.27	5.8	12	82	0.1	loam	0.32	23	2.1844	1.30171	1.58489e-06	0.06146	0.000177095	0.427468	0.808585	1.01596	-6.61895	-8.68958	1505.2	1.1848e-08	1.22307e-07	1.26441e-06	3.75965e-08	5.4932e-07	6.50769e-07	8.11396e-06	61622.2	0.451059	2.88193e-06	248551	19909.9
1199	38	40	22	1.39	1.27	5.8	12	82	0.1	loam	0.32	23	2.1844	1.30171	1.58489e-06	0.06146	0.000177095	0.427468	0.808585	1.01596	-6.61895	-8.68958	1505.2	1.1848e-08	1.22307e-07	1.26441e-06	3.75965e-08	5.4932e-07	6.50769e-07	8.11396e-06	61622.2	0.451059	2.88193e-06	248551	19909.9
1200	38	40	22	1.39	1.27	5.8	12	82	0.1	loam	0.32	23	2.1844	1.30171	1.58489e-06	0.06146	0.000177095	0.427468	0.808585	1.01596	-6.61895	-8.68958	1505.2	1.1848e-08	1.22307e-07	1.26441e-06	3.75965e-08	5.4932e-07	6.50769e-07	8.11396e-06	61622.2	0.451059	2.88193e-06	248551	19909.9
1201	40	39	21	1.4	1.25	5.1	11	47	0.1	loam	0.32	23	2.15	1.41568	7.94328e-06	0.03492	2.48837e-05	0.500038	0.840913	1.01926	-6.52501	-7.98077	1212.42	5.11662e-08	1.40279e-07	1.2719e-06	1.21657e-07	2.71002e-06	7.57474e-07	1.47532e-05	33891	0.454495	1.45238e-05	208487	46641.4
1202	75	15	10	1.58	0.97	5.3	4	57	0.1	sandy loam	0.2	13	1.6684	1.30128	5.01187e-06	0.00326239	7.36004e-11	0.778661	0.939371	0.786376	-6.72428	-8.27138	1084.26	3.30394e-08	1.31993e-07	1.26845e-06	8.29028e-08	1.71387e-06	7.05714e-07	4.67852e-06	106871	0.470362	7.04208e-06	189889	67219.4
1203	40	39	21	1.4	1.25	5.1	11	47	0.1	loam	0.32	23	2.15	1.41568	7.94328e-06	0.03492	2.48837e-05	0.500038	0.840913	1.01926	-6.52501	-7.98077	1212.42	5.11662e-08	1.40279e-07	1.2719e-06	1.21657e-07	2.71002e-06	7.57474e-07	1.47532e-05	33891	0.454495	1.45238e-05	208487	46641.4
1204	37	40	23	1.38	1.07	6.2	13	88	0.1	loam	0.32	23	1.8404	1.17939	6.30957e-07	0.08447	0.000241459	0.389683	0.790092	1.01095	-6.69776	-9.02741	1804.69	5.94924e-09	1.19611e-07	1.26329e-06	2.49851e-08	2.25157e-07	6.35881e-07	6.33976e-06	78867.4	0.445882	1.34898e-06	286368	13584.6
1205	37	40	23	1.38	1.07	6.2	13	88	0.1	loam	0.32	23	1.8404	1.17939	6.30957e-07	0.08447	0.000241459	0.389683	0.790092	1.01095	-6.69776	-9.02741	1804.69	5.94924e-09	1.19611e-07	1.26329e-06	2.49851e-08	2.25157e-07	6.35881e-07	6.33976e-06	78867.4	0.445882	1.34898e-06	286368	13584.6
1207	78	13	9	1.6	0.56	6.3	6	74	0.1	sandy loam	0.2	13	0.9632	0.957113	5.01187e-07	0.0288	2.62541e-05	0.525488	0.851414	0.788713	-6.92796	-9.05715	1733.08	5.14678e-09	1.19244e-07	1.26313e-06	2.32695e-08	1.81058e-07	6.2781e-07	2.72604e-06	183417	0.4729	1.13275e-06	277598	27274.5
1208	37	40	23	1.38	1.07	6.2	13	88	0.1	loam	0.32	23	1.8404	1.17939	6.30957e-07	0.08447	0.000241459	0.389683	0.790092	1.01095	-6.69776	-9.02741	1804.69	5.94924e-09	1.19611e-07	1.26329e-06	2.49851e-08	2.25157e-07	6.35881e-07	6.33976e-06	78867.4	0.445882	1.34898e-06	286368	13584.6
1209	37	40	23	1.38	1.07	6.2	13	88	0.1	loam	0.32	23	1.8404	1.17939	6.30957e-07	0.08447	0.000241459	0.389683	0.790092	1.01095	-6.69776	-9.02741	1804.69	5.94924e-09	1.19611e-07	1.26329e-06	2.49851e-08	2.25157e-07	6.35881e-07	6.33976e-06	78867.4	0.445882	1.34898e-06	286368	13584.6
1211	78	13	9	1.6	0.56	6.3	6	74	0.1	sandy loam	0.2	13	0.9632	0.957113	5.01187e-07	0.0288	2.62541e-05	0.525488	0.851414	0.788713	-6.92796	-9.05715	1733.08	5.14678e-09	1.19244e-07	1.26313e-06	2.32695e-08	1.81058e-07	6.2781e-07	2.72604e-06	183417	0.4729	1.13275e-06	277598	27274.5
1212	17	31	52	1.23	4.2	5	23	22	0.1	clay (light)	0.2	24	7.224	1.81691	1e-05	0.10448	2.1852e-07	0.366367	0.777999	0.985319	-6.37578	-8.37671	897.229	6.38843e-08	1.46092e-07	1.27433e-06	1.48848e-07	3.40893e-06	7.92653e-07	1.42394e-05	35113.7	0.402817	4.48941e-06	161482	10254.1
1213	33	45	22	1.38	3.71	5.5	18	34	0.1	loam	0.32	23	6.3812	1.69258	3.16228e-06	0.09054	4.62285e-12	0.381878	0.786106	1.02667	-6.43411	-8.79526	983.433	2.16021e-08	1.26766e-07	1.26627e-06	5.84503e-08	1.08535e-06	6.73479e-07	1.22489e-05	40819.9	0.462318	2.22038e-06	174768	7323.21
1214	33	45	22	1.38	3.71	5.5	18	34	0.1	loam	0.32	23	6.3812	1.69258	3.16228e-06	0.09054	4.62285e-12	0.381878	0.786106	1.02667	-6.43411	-8.79526	983.433	2.16021e-08	1.26766e-07	1.26627e-06	5.84503e-08	1.08535e-06	6.73479e-07	1.22489e-05	40819.9	0.462318	2.22038e-06	174768	7323.21
1215	39	38	23	1.38	1.83	6.4	18	87	0.1	loam	0.32	23	3.1476	1.31553	3.98107e-07	0.12189	9.85744e-05	0.350677	0.769532	1.01631	-6.65226	-9.43049	1625.16	4.50937e-09	1.18953e-07	1.26301e-06	2.19067e-08	1.4603e-07	6.27966e-07	6.10435e-06	81908.8	0.45142	5.26693e-07	264061	5142.47
1216	35	41	24	1.37	1.68	6.2	19	87	0.1	loam	0.32	23	2.8896	1.32241	6.30957e-07	0.13259	0.000298876	0.3426	0.765062	1.01229	-6.63882	-9.20069	1575.67	5.94924e-09	1.19611e-07	1.26329e-06	2.49851e-08	2.25157e-07	6.37431e-07	7.21394e-06	69310.2	0.447266	9.08939e-07	257722	7261.89
1217	35	41	24	1.37	1.68	6.2	19	87	0.1	loam	0.32	23	2.8896	1.32241	6.30957e-07	0.13259	0.000298876	0.3426	0.765062	1.01229	-6.63882	-9.20069	1575.67	5.94924e-09	1.19611e-07	1.26329e-06	2.49851e-08	2.25157e-07	6.37431e-07	7.21394e-06	69310.2	0.447266	9.08939e-07	257722	7261.89
1218	35	41	24	1.37	1.68	6.2	19	87	0.1	loam	0.32	23	2.8896	1.32241	6.30957e-07	0.13259	0.000298876	0.3426	0.765062	1.01229	-6.63882	-9.20069	1575.67	5.94924e-09	1.19611e-07	1.26329e-06	2.49851e-08	2.25157e-07	6.37431e-07	7.21394e-06	69310.2	0.447266	9.08939e-07	257722	7261.89
1221	73	18	9	1.59	1.4	7.5	12	75	0.1	sandy loam	0.2	13	2.408	1.04361	3.16228e-08	0.11474	6.78084e-11	0.356698	0.772814	0.797865	-6.96556	-10.6039	1889.82	2.24315e-09	1.17917e-07	1.26258e-06	1.70616e-08	2.1492e-08	6.18918e-07	2.31786e-06	215716	0.482972	3.16921e-08	296585	979.273
1246	73	18	9	1.59	1.4	7.5	12	75	0.1	sandy loam	0.2	13	2.408	1.04361	3.16228e-08	0.11474	6.78084e-11	0.356698	0.772814	0.797865	-6.96556	-10.6039	1889.82	2.24315e-09	1.17917e-07	1.26258e-06	1.70616e-08	2.1492e-08	6.18918e-07	2.31786e-06	215716	0.482972	3.16921e-08	296585	979.273
1252	73	18	9	1.59	1.4	7.5	12	75	0.1	sandy loam	0.2	13	2.408	1.04361	3.16228e-08	0.11474	6.78084e-11	0.356698	0.772814	0.797865	-6.96556	-10.6039	1889.82	2.24315e-09	1.17917e-07	1.26258e-06	1.70616e-08	2.1492e-08	6.18918e-07	2.31786e-06	215716	0.482972	3.16921e-08	296585	979.273
1256	73	18	9	1.59	1.4	7.5	12	75	0.1	sandy loam	0.2	13	2.408	1.04361	3.16228e-08	0.11474	6.78084e-11	0.356698	0.772814	0.797865	-6.96556	-10.6039	1889.82	2.24315e-09	1.17917e-07	1.26258e-06	1.70616e-08	2.1492e-08	6.18918e-07	2.31786e-06	215716	0.482972	3.16921e-08	296585	979.273
1268	73	18	9	1.59	1.4	7.5	12	75	0.1	sandy loam	0.2	13	2.408	1.04361	3.16228e-08	0.11474	6.78084e-11	0.356698	0.772814	0.797865	-6.96556	-10.6039	1889.82	2.24315e-09	1.17917e-07	1.26258e-06	1.70616e-08	2.1492e-08	6.18918e-07	2.31786e-06	215716	0.482972	3.16921e-08	296585	979.273
1269	73	18	9	1.59	1.4	7.5	12	75	0.1	sandy loam	0.2	13	2.408	1.04361	3.16228e-08	0.11474	6.78084e-11	0.356698	0.772814	0.797865	-6.96556	-10.6039	1889.82	2.24315e-09	1.17917e-07	1.26258e-06	1.70616e-08	2.1492e-08	6.18918e-07	2.31786e-06	215716	0.482972	3.16921e-08	296585	979.273
1277	73	18	9	1.59	1.4	7.5	12	75	0.1	sandy loam	0.2	13	2.408	1.04361	3.16228e-08	0.11474	6.78084e-11	0.356698	0.772814	0.797865	-6.96556	-10.6039	1889.82	2.24315e-09	1.17917e-07	1.26258e-06	1.70616e-08	2.1492e-08	6.18918e-07	2.31786e-06	215716	0.482972	3.16921e-08	296585	979.273
1283	73	18	9	1.59	1.4	7.5	12	75	0.1	sandy loam	0.2	13	2.408	1.04361	3.16228e-08	0.11474	6.78084e-11	0.356698	0.772814	0.797865	-6.96556	-10.6039	1889.82	2.24315e-09	1.17917e-07	1.26258e-06	1.70616e-08	2.1492e-08	6.18918e-07	2.31786e-06	215716	0.482972	3.16921e-08	296585	979.273
1284	73	18	9	1.59	1.4	7.5	12	75	0.1	sandy loam	0.2	13	2.408	1.04361	3.16228e-08	0.11474	6.78084e-11	0.356698	0.772814	0.797865	-6.96556	-10.6039	1889.82	2.24315e-09	1.17917e-07	1.26258e-06	1.70616e-08	2.1492e-08	6.18918e-07	2.31786e-06	215716	0.482972	3.16921e-08	296585	979.273
1326	80	12	8	1.62	0.55	7	6	88	0.1	loamy sand	0.17	13	0.946	0.832401	1e-07	0.0418	4.51338e-06	0.476478	0.830827	0.79728	-7.01916	-9.74325	2138.02	2.66597e-09	1.1811e-07	1.26266e-06	1.79656e-08	4.47278e-08	6.20232e-07	1.73113e-06	288829	0.482321	1.92085e-07	325133	8700.27
1329	80	12	8	1.62	0.55	7	6	88	0.1	loamy sand	0.17	13	0.946	0.832401	1e-07	0.0418	4.51338e-06	0.476478	0.830827	0.79728	-7.01916	-9.74325	2138.02	2.66597e-09	1.1811e-07	1.26266e-06	1.79656e-08	4.47278e-08	6.20232e-07	1.73113e-06	288829	0.482321	1.92085e-07	325133	8700.27
1358	49	32	19	1.43	1.1	5	7	36	0.1	loam	0.32	23	1.892	1.39215	1e-05	0.01271	9.51976e-07	0.631412	0.891412	1.02541	-6.52436	-7.82638	1210.6	6.38843e-08	1.46092e-07	1.27433e-06	1.48848e-07	3.40893e-06	7.92672e-07	1.32196e-05	37822.7	0.460983	2.00038e-05	208228	72625.4
1361	81	11	8	1.62	0.58	6.7	6	88	0.1	loamy sand	0.17	13	0.9976	0.900238	1.99526e-07	0.03669	1.59918e-05	0.493534	0.838165	0.79781	-6.9717	-9.46335	1916.72	3.28141e-09	1.18391e-07	1.26278e-06	1.92814e-08	7.85485e-08	6.22276e-07	1.92478e-06	259770	0.482911	3.65482e-07	299768	13743.8
1365	81	11	8	1.62	0.58	6.7	6	88	0.1	loamy sand	0.17	13	0.9976	0.900238	1.99526e-07	0.03669	1.59918e-05	0.493534	0.838165	0.79781	-6.9717	-9.46335	1916.72	3.28141e-09	1.18391e-07	1.26278e-06	1.92814e-08	7.85485e-08	6.22276e-07	1.92478e-06	259770	0.482911	3.65482e-07	299768	13743.8
1370	81	11	8	1.62	0.58	6.7	6	88	0.1	loamy sand	0.17	13	0.9976	0.900238	1.99526e-07	0.03669	1.59918e-05	0.493534	0.838165	0.79781	-6.9717	-9.46335	1916.72	3.28141e-09	1.18391e-07	1.26278e-06	1.92814e-08	7.85485e-08	6.22276e-07	1.92478e-06	259770	0.482911	3.65482e-07	299768	13743.8
1371	81	11	8	1.62	0.58	6.7	6	88	0.1	loamy sand	0.17	13	0.9976	0.900238	1.99526e-07	0.03669	1.59918e-05	0.493534	0.838165	0.79781	-6.9717	-9.46335	1916.72	3.28141e-09	1.18391e-07	1.26278e-06	1.92814e-08	7.85485e-08	6.22276e-07	1.92478e-06	259770	0.482911	3.65482e-07	299768	13743.8
1372	81	11	8	1.62	0.58	6.7	6	88	0.1	loamy sand	0.17	13	0.9976	0.900238	1.99526e-07	0.03669	1.59918e-05	0.493534	0.838165	0.79781	-6.9717	-9.46335	1916.72	3.28141e-09	1.18391e-07	1.26278e-06	1.92814e-08	7.85485e-08	6.22276e-07	1.92478e-06	259770	0.482911	3.65482e-07	299768	13743.8
1378	81	11	8	1.62	0.58	6.7	6	88	0.1	loamy sand	0.17	13	0.9976	0.900238	1.99526e-07	0.03669	1.59918e-05	0.493534	0.838165	0.79781	-6.9717	-9.46335	1916.72	3.28141e-09	1.18391e-07	1.26278e-06	1.92814e-08	7.85485e-08	6.22276e-07	1.92478e-06	259770	0.482911	3.65482e-07	299768	13743.8
1379	19	32	49	1.24	1.26	6.4	27	93	0.1	clay (light)	0.2	24	2.1672	1.19721	3.98107e-07	0.24041	0.000606043	0.297792	0.738717	0.977705	-6.72351	-9.31751	1998.16	4.50937e-09	1.18953e-07	1.26301e-06	2.19067e-08	1.4603e-07	6.41664e-07	4.50896e-06	110890	0.395817	5.19375e-07	309267	7050.23
1380	80	9	11	1.57	0.55	4.7	10	88	0.1	sandy loam	0.2	13	0.946	1.2234	1.99526e-05	0.09842	0.00201439	0.372736	0.781359	0.77363	-6.72446	-7.4624	1084.7	1.25428e-07	1.74223e-07	1.28605e-06	2.80426e-07	6.791e-06	1.02047e-06	2.10024e-05	23806.8	0.456759	4.70094e-05	189954	97100.5
1381	30	41	29	1.33	3	4.5	18	93	0.1	clay loam	0.18	23	5.16	1.79523	3.16228e-05	0.09297	0.000920172	0.378946	0.784593	1.00403	-6.34076	-7.73149	793.229	1.97593e-07	2.07209e-07	1.2998e-06	4.34711e-07	1.07567e-05	1.19433e-06	2.46581e-05	20277.3	0.438837	1.58119e-05	144996	20401.1
1382	8	34	58	1.19	2.59	5	27	80	0.1	clay (light)	0.2	24	4.4548	1.66364	1e-05	0.16654	0.000752775	0.32268	0.75369	0.97238	-6.44584	-8.20033	1054.29	6.38843e-08	1.46092e-07	1.27433e-06	1.48848e-07	3.40893e-06	8.12966e-07	1.62356e-05	30796.4	0.390993	7.17564e-06	185440	16022.6
1383	30	41	29	1.33	3	4.5	18	93	0.1	clay loam	0.18	23	5.16	1.79523	3.16228e-05	0.09297	0.000920172	0.378946	0.784593	1.00403	-6.34076	-7.73149	793.229	1.97593e-07	2.07209e-07	1.2998e-06	4.34711e-07	1.07567e-05	1.19433e-06	2.46581e-05	20277.3	0.438837	1.58119e-05	144996	20401.1
1384	30	41	29	1.33	3	4.5	18	93	0.1	clay loam	0.18	23	5.16	1.79523	3.16228e-05	0.09297	0.000920172	0.378946	0.784593	1.00403	-6.34076	-7.73149	793.229	1.97593e-07	2.07209e-07	1.2998e-06	4.34711e-07	1.07567e-05	1.19433e-06	2.46581e-05	20277.3	0.438837	1.58119e-05	144996	20401.1
1385	30	41	29	1.33	3	4.5	18	93	0.1	clay loam	0.18	23	5.16	1.79523	3.16228e-05	0.09297	0.000920172	0.378946	0.784593	1.00403	-6.34076	-7.73149	793.229	1.97593e-07	2.07209e-07	1.2998e-06	4.34711e-07	1.07567e-05	1.19433e-06	2.46581e-05	20277.3	0.438837	1.58119e-05	144996	20401.1
1386	30	41	29	1.33	3	4.5	18	93	0.1	clay loam	0.18	23	5.16	1.79523	3.16228e-05	0.09297	0.000920172	0.378946	0.784593	1.00403	-6.34076	-7.73149	793.229	1.97593e-07	2.07209e-07	1.2998e-06	4.34711e-07	1.07567e-05	1.19433e-06	2.46581e-05	20277.3	0.438837	1.58119e-05	144996	20401.1
1388	8	34	58	1.19	2.59	5	27	80	0.1	clay (light)	0.2	24	4.4548	1.66364	1e-05	0.16654	0.000752775	0.32268	0.75369	0.97238	-6.44584	-8.20033	1054.29	6.38843e-08	1.46092e-07	1.27433e-06	1.48848e-07	3.40893e-06	8.12966e-07	1.62356e-05	30796.4	0.390993	7.17564e-06	185440	16022.6
1399	48	30	22	1.41	0.8	6.3	11	91	0.1	loam	0.32	23	1.376	1.07019	5.01187e-07	0.0771	0.000227745	0.400211	0.795376	1.01134	-6.74843	-9.01468	2027.99	5.14678e-09	1.19244e-07	1.26313e-06	2.32695e-08	1.81058e-07	6.33249e-07	5.73521e-06	87180.8	0.446289	1.35829e-06	312699	16525.5
1400	48	30	22	1.41	0.8	6.3	11	91	0.1	loam	0.32	23	1.376	1.07019	5.01187e-07	0.0771	0.000227745	0.400211	0.795376	1.01134	-6.74843	-9.01468	2027.99	5.14678e-09	1.19244e-07	1.26313e-06	2.32695e-08	1.81058e-07	6.33249e-07	5.73521e-06	87180.8	0.446289	1.35829e-06	312699	16525.5
1401	37	44	19	1.41	0.82	6	14	83	0.1	loam	0.32	23	1.4104	1.12902	1e-06	0.10948	0.000576143	0.361492	0.775398	1.02248	-6.69827	-8.71521	1806.82	8.23128e-09	1.20654e-07	1.26372e-06	2.9864e-08	3.50564e-07	6.51347e-07	8.04521e-06	62148.8	0.457879	2.63835e-06	286626	21519.4
1403	47	29	24	1.39	0.86	6.4	12	89	0.1	loam	0.32	23	1.4792	1.07612	3.98107e-07	0.08436	0.000181828	0.389831	0.790167	1.0056	-6.75598	-9.14729	2063.58	4.50937e-09	1.18953e-07	1.26301e-06	2.19067e-08	1.4603e-07	6.30213e-07	5.49451e-06	90999.9	0.44043	1.0288e-06	316758	13061.1
1404	47	29	24	1.39	0.86	6.4	12	89	0.1	loam	0.32	23	1.4792	1.07612	3.98107e-07	0.08436	0.000181828	0.389831	0.790167	1.0056	-6.75598	-9.14729	2063.58	4.50937e-09	1.18953e-07	1.26301e-06	2.19067e-08	1.4603e-07	6.30213e-07	5.49451e-06	90999.9	0.44043	1.0288e-06	316758	13061.1
1407	47	29	24	1.39	0.86	6.4	12	89	0.1	loam	0.32	23	1.4792	1.07612	3.98107e-07	0.08436	0.000181828	0.389831	0.790167	1.0056	-6.75598	-9.14729	2063.58	4.50937e-09	1.18953e-07	1.26301e-06	2.19067e-08	1.4603e-07	6.30213e-07	5.49451e-06	90999.9	0.44043	1.0288e-06	316758	13061.1
1408	47	29	24	1.39	0.86	6.4	12	89	0.1	loam	0.32	23	1.4792	1.07612	3.98107e-07	0.08436	0.000181828	0.389831	0.790167	1.0056	-6.75598	-9.14729	2063.58	4.50937e-09	1.18953e-07	1.26301e-06	2.19067e-08	1.4603e-07	6.30213e-07	5.49451e-06	90999.9	0.44043	1.0288e-06	301712	12440.7
1409	26	27	47	1.25	1.22	6.3	18	77	0.1	clay (light)	0.2	24	2.0984	1.20398	5.01187e-07	0.11486	0.000189376	0.356593	0.772757	0.980478	-6.71257	-9.20279	1948.47	5.14678e-09	1.19244e-07	1.26313e-06	2.32695e-08	1.81058e-07	6.32214e-07	4.02187e-06	124320	0.398352	6.66708e-07	303494	10020.6
1411	26	27	47	1.25	1.22	6.3	18	77	0.1	clay (light)	0.2	24	2.0984	1.20398	5.01187e-07	0.11486	0.000189376	0.356593	0.772757	0.980478	-6.71257	-9.20279	1948.47	5.14678e-09	1.19244e-07	1.26313e-06	2.32695e-08	1.81058e-07	6.32214e-07	4.02187e-06	124320	0.398352	6.66708e-07	303494	10020.6
1412	47	29	24	1.39	0.86	6.4	12	89	0.1	loam	0.32	23	1.4792	1.07612	3.98107e-07	0.08436	0.000181828	0.389831	0.790167	1.0056	-6.75598	-9.14729	2063.58	4.50937e-09	1.18953e-07	1.26301e-06	2.19067e-08	1.4603e-07	6.30213e-07	5.49451e-06	90999.9	0.44043	1.0288e-06	316758	13061.1
1413	47	29	24	1.39	0.86	6.4	12	89	0.1	loam	0.32	23	1.4792	1.07612	3.98107e-07	0.08436	0.000181828	0.389831	0.790167	1.0056	-6.75598	-9.14729	2063.58	4.50937e-09	1.18953e-07	1.26301e-06	2.19067e-08	1.4603e-07	6.30213e-07	5.49451e-06	90999.9	0.44043	1.0288e-06	316758	13061.1
1414	47	29	24	1.39	0.86	6.4	12	89	0.1	loam	0.32	23	1.4792	1.07612	3.98107e-07	0.08436	0.000181828	0.389831	0.790167	1.0056	-6.75598	-9.14729	2063.58	4.50937e-09	1.18953e-07	1.26301e-06	2.19067e-08	1.4603e-07	6.30213e-07	5.49451e-06	90999.9	0.44043	1.0288e-06	316758	13061.1
1416	47	29	24	1.39	0.86	6.4	12	89	0.1	loam	0.32	23	1.4792	1.07612	3.98107e-07	0.08436	0.000181828	0.389831	0.790167	1.0056	-6.75598	-9.14729	2063.58	4.50937e-09	1.18953e-07	1.26301e-06	2.19067e-08	1.4603e-07	6.30213e-07	5.49451e-06	90999.9	0.44043	1.0288e-06	316758	13061.1
1417	47	29	24	1.39	0.86	6.4	12	89	0.1	loam	0.32	23	1.4792	1.07612	3.98107e-07	0.08436	0.000181828	0.389831	0.790167	1.0056	-6.75598	-9.14729	2063.58	4.50937e-09	1.18953e-07	1.26301e-06	2.19067e-08	1.4603e-07	6.30213e-07	5.49451e-06	90999.9	0.44043	1.0288e-06	316758	13061.1
1419	47	29	24	1.39	0.86	6.4	12	89	0.1	loam	0.32	23	1.4792	1.07612	3.98107e-07	0.08436	0.000181828	0.389831	0.790167	1.0056	-6.75598	-9.14729	2063.58	4.50937e-09	1.18953e-07	1.26301e-06	2.19067e-08	1.4603e-07	6.30213e-07	5.49451e-06	90999.9	0.44043	1.0288e-06	301712	12440.7
1420	56	20	24	1.41	0.74	6.3	7	85	0.1	sandy clay loam	0.16	13	1.2728	1.04547	5.01187e-07	0.03195	3.25636e-06	0.511765	0.8458	0.718656	-6.93409	-9.22163	1757.68	5.14678e-09	1.19244e-07	1.26313e-06	2.32695e-08	1.81058e-07	6.2719e-07	2.23894e-06	223320	0.402451	8.27383e-07	280629	20867.9
1421	56	20	24	1.41	0.74	6.3	7	85	0.1	sandy clay loam	0.16	13	1.2728	1.04547	5.01187e-07	0.03195	3.25636e-06	0.511765	0.8458	0.718656	-6.93409	-9.22163	1757.68	5.14678e-09	1.19244e-07	1.26313e-06	2.32695e-08	1.81058e-07	6.2719e-07	2.23894e-06	223320	0.402451	8.27383e-07	280629	20867.9
1422	79	11	10	1.59	0.53	6.3	4	76	0.1	sandy loam	0.2	13	0.9116	0.939657	5.01187e-07	0.01286	7.86541e-09	0.629954	0.890896	0.780338	-6.94008	-9.04265	1782.13	5.14678e-09	1.19244e-07	1.26313e-06	2.32695e-08	1.81058e-07	6.27102e-07	2.27355e-06	219921	0.463869	1.20152e-06	283623	34764.2
1423	79	11	10	1.59	0.53	6.3	4	76	0.1	sandy loam	0.2	13	0.9116	0.939657	5.01187e-07	0.01286	7.86541e-09	0.629954	0.890896	0.780338	-6.94008	-9.04265	1782.13	5.14678e-09	1.19244e-07	1.26313e-06	2.32695e-08	1.81058e-07	6.27102e-07	2.27355e-06	219921	0.463869	1.20152e-06	283623	34764.2
1424	79	11	10	1.59	0.53	6.3	4	76	0.1	sandy loam	0.2	13	0.9116	0.939657	5.01187e-07	0.01286	7.86541e-09	0.629954	0.890896	0.780338	-6.94008	-9.04265	1782.13	5.14678e-09	1.19244e-07	1.26313e-06	2.32695e-08	1.81058e-07	6.27102e-07	2.27355e-06	219921	0.463869	1.20152e-06	283623	34764.2
1425	56	20	24	1.41	0.74	6.3	7	85	0.1	sandy clay loam	0.16	13	1.2728	1.04547	5.01187e-07	0.03195	3.25636e-06	0.511765	0.8458	0.718656	-6.93409	-9.22163	1757.68	5.14678e-09	1.19244e-07	1.26313e-06	2.32695e-08	1.81058e-07	6.2719e-07	2.23894e-06	223320	0.402451	8.27383e-07	280629	20867.9
1426	56	20	24	1.41	0.74	6.3	7	85	0.1	sandy clay loam	0.16	13	1.2728	1.04547	5.01187e-07	0.03195	3.25636e-06	0.511765	0.8458	0.718656	-6.93409	-9.22163	1757.68	5.14678e-09	1.19244e-07	1.26313e-06	2.32695e-08	1.81058e-07	6.2719e-07	2.23894e-06	223320	0.402451	8.27383e-07	280629	20867.9
1427	79	11	10	1.59	0.53	6.3	4	76	0.1	sandy loam	0.2	13	0.9116	0.939657	5.01187e-07	0.01286	7.86541e-09	0.629954	0.890896	0.780338	-6.94008	-9.04265	1782.13	5.14678e-09	1.19244e-07	1.26313e-06	2.32695e-08	1.81058e-07	6.27102e-07	2.27355e-06	219921	0.463869	1.20152e-06	283623	34764.2
1428	79	11	10	1.59	0.53	6.3	4	76	0.1	sandy loam	0.2	13	0.9116	0.939657	5.01187e-07	0.01286	7.86541e-09	0.629954	0.890896	0.780338	-6.94008	-9.04265	1782.13	5.14678e-09	1.19244e-07	1.26313e-06	2.32695e-08	1.81058e-07	6.27102e-07	2.27355e-06	219921	0.463869	1.20152e-06	283623	34764.2
1429	56	20	24	1.41	0.74	6.3	7	85	0.1	sandy clay loam	0.16	13	1.2728	1.04547	5.01187e-07	0.03195	3.25636e-06	0.511765	0.8458	0.718656	-6.93409	-9.22163	1757.68	5.14678e-09	1.19244e-07	1.26313e-06	2.32695e-08	1.81058e-07	6.2719e-07	2.23894e-06	223320	0.402451	8.27383e-07	280629	20867.9
1430	56	20	24	1.41	0.74	6.3	7	85	0.1	sandy clay loam	0.16	13	1.2728	1.04547	5.01187e-07	0.03195	3.25636e-06	0.511765	0.8458	0.718656	-6.93409	-9.22163	1757.68	5.14678e-09	1.19244e-07	1.26313e-06	2.32695e-08	1.81058e-07	6.2719e-07	2.23894e-06	223320	0.402451	8.27383e-07	280629	20867.9
1431	56	20	24	1.41	0.74	6.3	7	85	0.1	sandy clay loam	0.16	13	1.2728	1.04547	5.01187e-07	0.03195	3.25636e-06	0.511765	0.8458	0.718656	-6.93409	-9.22163	1757.68	5.14678e-09	1.19244e-07	1.26313e-06	2.32695e-08	1.81058e-07	6.2719e-07	2.23894e-06	223320	0.402451	8.27383e-07	280629	20867.9
1432	56	20	24	1.41	0.74	6.3	7	85	0.1	sandy clay loam	0.16	13	1.2728	1.04547	5.01187e-07	0.03195	3.25636e-06	0.511765	0.8458	0.718656	-6.93409	-9.22163	1757.68	5.14678e-09	1.19244e-07	1.26313e-06	2.32695e-08	1.81058e-07	6.2719e-07	2.23894e-06	223320	0.402451	8.27383e-07	280629	20867.9
1433	56	20	24	1.41	0.74	6.3	7	85	0.1	sandy clay loam	0.16	13	1.2728	1.04547	5.01187e-07	0.03195	3.25636e-06	0.511765	0.8458	0.718656	-6.93409	-9.22163	1757.68	5.14678e-09	1.19244e-07	1.26313e-06	2.32695e-08	1.81058e-07	6.2719e-07	2.23894e-06	223320	0.402451	8.27383e-07	280629	20867.9
1434	56	20	24	1.41	0.74	6.3	7	85	0.1	sandy clay loam	0.16	13	1.2728	1.04547	5.01187e-07	0.03195	3.25636e-06	0.511765	0.8458	0.718656	-6.93409	-9.22163	1757.68	5.14678e-09	1.19244e-07	1.26313e-06	2.32695e-08	1.81058e-07	6.2719e-07	2.23894e-06	223320	0.402451	8.27383e-07	280629	20867.9
1436	79	11	10	1.59	0.53	6.3	4	76	0.1	sandy loam	0.2	13	0.9116	0.939657	5.01187e-07	0.01286	7.86541e-09	0.629954	0.890896	0.780338	-6.94008	-9.04265	1782.13	5.14678e-09	1.19244e-07	1.26313e-06	2.32695e-08	1.81058e-07	6.27102e-07	2.27355e-06	219921	0.463869	1.20152e-06	283623	34764.2
1438	56	20	24	1.41	0.74	6.3	7	85	0.1	sandy clay loam	0.16	13	1.2728	1.04547	5.01187e-07	0.03195	3.25636e-06	0.511765	0.8458	0.718656	-6.93409	-9.22163	1757.68	5.14678e-09	1.19244e-07	1.26313e-06	2.32695e-08	1.81058e-07	6.2719e-07	2.23894e-06	223320	0.402451	8.27383e-07	280629	20867.9
1439	56	20	24	1.41	0.74	6.3	7	85	0.1	sandy clay loam	0.16	13	1.2728	1.04547	5.01187e-07	0.03195	3.25636e-06	0.511765	0.8458	0.718656	-6.93409	-9.22163	1757.68	5.14678e-09	1.19244e-07	1.26313e-06	2.32695e-08	1.81058e-07	6.2719e-07	2.23894e-06	223320	0.402451	8.27383e-07	280629	20867.9
1440	56	20	24	1.41	0.74	6.3	7	85	0.1	sandy clay loam	0.16	13	1.2728	1.04547	5.01187e-07	0.03195	3.25636e-06	0.511765	0.8458	0.718656	-6.93409	-9.22163	1757.68	5.14678e-09	1.19244e-07	1.26313e-06	2.32695e-08	1.81058e-07	6.2719e-07	2.23894e-06	223320	0.402451	8.27383e-07	280629	20867.9
1441	79	11	10	1.59	0.53	6.3	4	76	0.1	sandy loam	0.2	13	0.9116	0.939657	5.01187e-07	0.01286	7.86541e-09	0.629954	0.890896	0.780338	-6.94008	-9.04265	1782.13	5.14678e-09	1.19244e-07	1.26313e-06	2.32695e-08	1.81058e-07	6.27102e-07	2.27355e-06	219921	0.463869	1.20152e-06	283623	34764.2
1442	56	20	24	1.41	0.74	6.3	7	85	0.1	sandy clay loam	0.16	13	1.2728	1.04547	5.01187e-07	0.03195	3.25636e-06	0.511765	0.8458	0.718656	-6.93409	-9.22163	1757.68	5.14678e-09	1.19244e-07	1.26313e-06	2.32695e-08	1.81058e-07	6.2719e-07	2.23894e-06	223320	0.402451	8.27383e-07	280629	20867.9
1443	56	20	24	1.41	0.74	6.3	7	85	0.1	sandy clay loam	0.16	13	1.2728	1.04547	5.01187e-07	0.03195	3.25636e-06	0.511765	0.8458	0.718656	-6.93409	-9.22163	1757.68	5.14678e-09	1.19244e-07	1.26313e-06	2.32695e-08	1.81058e-07	6.2719e-07	2.23894e-06	223320	0.402451	8.27383e-07	280629	20867.9
1444	56	20	24	1.41	0.74	6.3	7	85	0.1	sandy clay loam	0.16	13	1.2728	1.04547	5.01187e-07	0.03195	3.25636e-06	0.511765	0.8458	0.718656	-6.93409	-9.22163	1757.68	5.14678e-09	1.19244e-07	1.26313e-06	2.32695e-08	1.81058e-07	6.2719e-07	2.23894e-06	223320	0.402451	8.27383e-07	280629	20867.9
1445	56	20	24	1.41	0.74	6.3	7	85	0.1	sandy clay loam	0.16	13	1.2728	1.04547	5.01187e-07	0.03195	3.25636e-06	0.511765	0.8458	0.718656	-6.93409	-9.22163	1757.68	5.14678e-09	1.19244e-07	1.26313e-06	2.32695e-08	1.81058e-07	6.2719e-07	2.23894e-06	223320	0.402451	8.27383e-07	280629	20867.9
1446	79	11	10	1.59	0.53	6.3	4	76	0.1	sandy loam	0.2	13	0.9116	0.939657	5.01187e-07	0.01286	7.86541e-09	0.629954	0.890896	0.780338	-6.94008	-9.04265	1782.13	5.14678e-09	1.19244e-07	1.26313e-06	2.32695e-08	1.81058e-07	6.27102e-07	2.27355e-06	219921	0.463869	1.20152e-06	283623	34764.2
1447	79	11	10	1.59	0.53	6.3	4	76	0.1	sandy loam	0.2	13	0.9116	0.939657	5.01187e-07	0.01286	7.86541e-09	0.629954	0.890896	0.780338	-6.94008	-9.04265	1782.13	5.14678e-09	1.19244e-07	1.26313e-06	2.32695e-08	1.81058e-07	6.27102e-07	2.27355e-06	219921	0.463869	1.20152e-06	283623	34764.2
1448	56	20	24	1.41	0.74	6.3	7	85	0.1	sandy clay loam	0.16	13	1.2728	1.04547	5.01187e-07	0.03195	3.25636e-06	0.511765	0.8458	0.718656	-6.93409	-9.22163	1757.68	5.14678e-09	1.19244e-07	1.26313e-06	2.32695e-08	1.81058e-07	6.2719e-07	2.23894e-06	223320	0.402451	8.27383e-07	280629	20867.9
1449	79	11	10	1.59	0.53	6.3	4	76	0.1	sandy loam	0.2	13	0.9116	0.939657	5.01187e-07	0.01286	7.86541e-09	0.629954	0.890896	0.780338	-6.94008	-9.04265	1782.13	5.14678e-09	1.19244e-07	1.26313e-06	2.32695e-08	1.81058e-07	6.27102e-07	2.27355e-06	219921	0.463869	1.20152e-06	283623	34764.2
1450	79	11	10	1.59	0.53	6.3	4	76	0.1	sandy loam	0.2	13	0.9116	0.939657	5.01187e-07	0.01286	7.86541e-09	0.629954	0.890896	0.780338	-6.94008	-9.04265	1782.13	5.14678e-09	1.19244e-07	1.26313e-06	2.32695e-08	1.81058e-07	6.27102e-07	2.27355e-06	219921	0.463869	1.20152e-06	283623	34764.2
1453	56	20	24	1.41	0.74	6.3	7	85	0.1	sandy clay loam	0.16	13	1.2728	1.04547	5.01187e-07	0.03195	3.25636e-06	0.511765	0.8458	0.718656	-6.93409	-9.22163	1757.68	5.14678e-09	1.19244e-07	1.26313e-06	2.32695e-08	1.81058e-07	6.2719e-07	2.23894e-06	223320	0.402451	8.27383e-07	280629	20867.9
1455	56	20	24	1.41	0.74	6.3	7	85	0.1	sandy clay loam	0.16	13	1.2728	1.04547	5.01187e-07	0.03195	3.25636e-06	0.511765	0.8458	0.718656	-6.93409	-9.22163	1757.68	5.14678e-09	1.19244e-07	1.26313e-06	2.32695e-08	1.81058e-07	6.2719e-07	2.23894e-06	223320	0.402451	8.27383e-07	280629	20867.9
1456	79	11	10	1.59	0.53	6.3	4	76	0.1	sandy loam	0.2	13	0.9116	0.939657	5.01187e-07	0.01286	7.86541e-09	0.629954	0.890896	0.780338	-6.94008	-9.04265	1782.13	5.14678e-09	1.19244e-07	1.26313e-06	2.32695e-08	1.81058e-07	6.27102e-07	2.27355e-06	219921	0.463869	1.20152e-06	283623	34764.2
1457	79	11	10	1.59	0.53	6.3	4	76	0.1	sandy loam	0.2	13	0.9116	0.939657	5.01187e-07	0.01286	7.86541e-09	0.629954	0.890896	0.780338	-6.94008	-9.04265	1782.13	5.14678e-09	1.19244e-07	1.26313e-06	2.32695e-08	1.81058e-07	6.27102e-07	2.27355e-06	219921	0.463869	1.20152e-06	283623	34764.2
1458	56	20	24	1.41	0.74	6.3	7	85	0.1	sandy clay loam	0.16	13	1.2728	1.04547	5.01187e-07	0.03195	3.25636e-06	0.511765	0.8458	0.718656	-6.93409	-9.22163	1757.68	5.14678e-09	1.19244e-07	1.26313e-06	2.32695e-08	1.81058e-07	6.2719e-07	2.23894e-06	223320	0.402451	8.27383e-07	280629	20867.9
1459	56	20	24	1.41	0.74	6.3	7	85	0.1	sandy clay loam	0.16	13	1.2728	1.04547	5.01187e-07	0.03195	3.25636e-06	0.511765	0.8458	0.718656	-6.93409	-9.22163	1757.68	5.14678e-09	1.19244e-07	1.26313e-06	2.32695e-08	1.81058e-07	6.2719e-07	2.23894e-06	223320	0.402451	8.27383e-07	280629	20867.9
1460	56	20	24	1.41	0.74	6.3	7	85	0.1	sandy clay loam	0.16	13	1.2728	1.04547	5.01187e-07	0.03195	3.25636e-06	0.511765	0.8458	0.718656	-6.93409	-9.22163	1757.68	5.14678e-09	1.19244e-07	1.26313e-06	2.32695e-08	1.81058e-07	6.2719e-07	2.23894e-06	223320	0.402451	8.27383e-07	280629	20867.9
1461	56	20	24	1.41	0.74	6.3	7	85	0.1	sandy clay loam	0.16	13	1.2728	1.04547	5.01187e-07	0.03195	3.25636e-06	0.511765	0.8458	0.718656	-6.93409	-9.22163	1757.68	5.14678e-09	1.19244e-07	1.26313e-06	2.32695e-08	1.81058e-07	6.2719e-07	2.23894e-06	223320	0.402451	8.27383e-07	280629	20867.9
1462	79	11	10	1.59	0.53	6.3	4	76	0.1	sandy loam	0.2	13	0.9116	0.939657	5.01187e-07	0.01286	7.86541e-09	0.629954	0.890896	0.780338	-6.94008	-9.04265	1782.13	5.14678e-09	1.19244e-07	1.26313e-06	2.32695e-08	1.81058e-07	6.27102e-07	2.27355e-06	219921	0.463869	1.20152e-06	283623	34764.2
1463	56	20	24	1.41	0.74	6.3	7	85	0.1	sandy clay loam	0.16	13	1.2728	1.04547	5.01187e-07	0.03195	3.25636e-06	0.511765	0.8458	0.718656	-6.93409	-9.22163	1757.68	5.14678e-09	1.19244e-07	1.26313e-06	2.32695e-08	1.81058e-07	6.2719e-07	2.23894e-06	223320	0.402451	8.27383e-07	280629	20867.9
1464	56	20	24	1.41	0.74	6.3	7	85	0.1	sandy clay loam	0.16	13	1.2728	1.04547	5.01187e-07	0.03195	3.25636e-06	0.511765	0.8458	0.718656	-6.93409	-9.22163	1757.68	5.14678e-09	1.19244e-07	1.26313e-06	2.32695e-08	1.81058e-07	6.2719e-07	2.23894e-06	223320	0.402451	8.27383e-07	280629	20867.9
1465	56	20	24	1.41	0.74	6.3	7	85	0.1	sandy clay loam	0.16	13	1.2728	1.04547	5.01187e-07	0.03195	3.25636e-06	0.511765	0.8458	0.718656	-6.93409	-9.22163	1757.68	5.14678e-09	1.19244e-07	1.26313e-06	2.32695e-08	1.81058e-07	6.2719e-07	2.23894e-06	223320	0.402451	8.27383e-07	280629	20867.9
1466	56	20	24	1.41	0.74	6.3	7	85	0.1	sandy clay loam	0.16	13	1.2728	1.04547	5.01187e-07	0.03195	3.25636e-06	0.511765	0.8458	0.718656	-6.93409	-9.22163	1757.68	5.14678e-09	1.19244e-07	1.26313e-06	2.32695e-08	1.81058e-07	6.2719e-07	2.23894e-06	223320	0.402451	8.27383e-07	280629	20867.9
1467	79	11	10	1.59	0.53	6.3	4	76	0.1	sandy loam	0.2	13	0.9116	0.939657	5.01187e-07	0.01286	7.86541e-09	0.629954	0.890896	0.780338	-6.94008	-9.04265	1782.13	5.14678e-09	1.19244e-07	1.26313e-06	2.32695e-08	1.81058e-07	6.27102e-07	2.27355e-06	219921	0.463869	1.20152e-06	283623	34764.2
1468	79	11	10	1.59	0.53	6.3	4	76	0.1	sandy loam	0.2	13	0.9116	0.939657	5.01187e-07	0.01286	7.86541e-09	0.629954	0.890896	0.780338	-6.94008	-9.04265	1782.13	5.14678e-09	1.19244e-07	1.26313e-06	2.32695e-08	1.81058e-07	6.27102e-07	2.27355e-06	219921	0.463869	1.20152e-06	283623	34764.2
1469	56	20	24	1.41	0.74	6.3	7	85	0.1	sandy clay loam	0.16	13	1.2728	1.04547	5.01187e-07	0.03195	3.25636e-06	0.511765	0.8458	0.718656	-6.93409	-9.22163	1757.68	5.14678e-09	1.19244e-07	1.26313e-06	2.32695e-08	1.81058e-07	6.2719e-07	2.23894e-06	223320	0.402451	8.27383e-07	280629	20867.9
1470	79	11	10	1.59	0.53	6.3	4	76	0.1	sandy loam	0.2	13	0.9116	0.939657	5.01187e-07	0.01286	7.86541e-09	0.629954	0.890896	0.780338	-6.94008	-9.04265	1782.13	5.14678e-09	1.19244e-07	1.26313e-06	2.32695e-08	1.81058e-07	6.27102e-07	2.27355e-06	219921	0.463869	1.20152e-06	283623	34764.2
1471	79	11	10	1.59	0.53	6.3	4	76	0.1	sandy loam	0.2	13	0.9116	0.939657	5.01187e-07	0.01286	7.86541e-09	0.629954	0.890896	0.780338	-6.94008	-9.04265	1782.13	5.14678e-09	1.19244e-07	1.26313e-06	2.32695e-08	1.81058e-07	6.27102e-07	2.27355e-06	219921	0.463869	1.20152e-06	283623	34764.2
1472	56	20	24	1.41	0.74	6.3	7	85	0.1	sandy clay loam	0.16	13	1.2728	1.04547	5.01187e-07	0.03195	3.25636e-06	0.511765	0.8458	0.718656	-6.93409	-9.22163	1757.68	5.14678e-09	1.19244e-07	1.26313e-06	2.32695e-08	1.81058e-07	6.2719e-07	2.23894e-06	223320	0.402451	8.27383e-07	280629	20867.9
1473	79	11	10	1.59	0.53	6.3	4	76	0.1	sandy loam	0.2	13	0.9116	0.939657	5.01187e-07	0.01286	7.86541e-09	0.629954	0.890896	0.780338	-6.94008	-9.04265	1782.13	5.14678e-09	1.19244e-07	1.26313e-06	2.32695e-08	1.81058e-07	6.27102e-07	2.27355e-06	219921	0.463869	1.20152e-06	283623	34764.2
1475	56	20	24	1.41	0.74	6.3	7	85	0.1	sandy clay loam	0.16	13	1.2728	1.04547	5.01187e-07	0.03195	3.25636e-06	0.511765	0.8458	0.718656	-6.93409	-9.22163	1757.68	5.14678e-09	1.19244e-07	1.26313e-06	2.32695e-08	1.81058e-07	6.2719e-07	2.23894e-06	223320	0.402451	8.27383e-07	280629	20867.9
1476	79	11	10	1.59	0.53	6.3	4	76	0.1	sandy loam	0.2	13	0.9116	0.939657	5.01187e-07	0.01286	7.86541e-09	0.629954	0.890896	0.780338	-6.94008	-9.04265	1782.13	5.14678e-09	1.19244e-07	1.26313e-06	2.32695e-08	1.81058e-07	6.27102e-07	2.27355e-06	219921	0.463869	1.20152e-06	283623	34764.2
1477	56	20	24	1.41	0.74	6.3	7	85	0.1	sandy clay loam	0.16	13	1.2728	1.04547	5.01187e-07	0.03195	3.25636e-06	0.511765	0.8458	0.718656	-6.93409	-9.22163	1757.68	5.14678e-09	1.19244e-07	1.26313e-06	2.32695e-08	1.81058e-07	6.2719e-07	2.23894e-06	223320	0.402451	8.27383e-07	280629	20867.9
1478	56	20	24	1.41	0.74	6.3	7	85	0.1	sandy clay loam	0.16	13	1.2728	1.04547	5.01187e-07	0.03195	3.25636e-06	0.511765	0.8458	0.718656	-6.93409	-9.22163	1757.68	5.14678e-09	1.19244e-07	1.26313e-06	2.32695e-08	1.81058e-07	6.2719e-07	2.23894e-06	223320	0.402451	8.27383e-07	280629	20867.9
1479	56	20	24	1.41	0.74	6.3	7	85	0.1	sandy clay loam	0.16	13	1.2728	1.04547	5.01187e-07	0.03195	3.25636e-06	0.511765	0.8458	0.718656	-6.93409	-9.22163	1757.68	5.14678e-09	1.19244e-07	1.26313e-06	2.32695e-08	1.81058e-07	6.2719e-07	2.23894e-06	223320	0.402451	8.27383e-07	280629	20867.9
1480	56	20	24	1.41	0.74	6.3	7	85	0.1	sandy clay loam	0.16	13	1.2728	1.04547	5.01187e-07	0.03195	3.25636e-06	0.511765	0.8458	0.718656	-6.93409	-9.22163	1757.68	5.14678e-09	1.19244e-07	1.26313e-06	2.32695e-08	1.81058e-07	6.2719e-07	2.23894e-06	223320	0.402451	8.27383e-07	280629	20867.9
1482	79	11	10	1.59	0.53	6.3	4	76	0.1	sandy loam	0.2	13	0.9116	0.939657	5.01187e-07	0.01286	7.86541e-09	0.629954	0.890896	0.780338	-6.94008	-9.04265	1782.13	5.14678e-09	1.19244e-07	1.26313e-06	2.32695e-08	1.81058e-07	6.27102e-07	2.27355e-06	219921	0.463869	1.20152e-06	283623	34764.2
1484	56	20	24	1.41	0.74	6.3	7	85	0.1	sandy clay loam	0.16	13	1.2728	1.04547	5.01187e-07	0.03195	3.25636e-06	0.511765	0.8458	0.718656	-6.93409	-9.22163	1757.68	5.14678e-09	1.19244e-07	1.26313e-06	2.32695e-08	1.81058e-07	6.2719e-07	2.23894e-06	223320	0.402451	8.27383e-07	280629	20867.9
1485	56	20	24	1.41	0.74	6.3	7	85	0.1	sandy clay loam	0.16	13	1.2728	1.04547	5.01187e-07	0.03195	3.25636e-06	0.511765	0.8458	0.718656	-6.93409	-9.22163	1757.68	5.14678e-09	1.19244e-07	1.26313e-06	2.32695e-08	1.81058e-07	6.2719e-07	2.23894e-06	223320	0.402451	8.27383e-07	280629	20867.9
1486	56	20	24	1.41	0.74	6.3	7	85	0.1	sandy clay loam	0.16	13	1.2728	1.04547	5.01187e-07	0.03195	3.25636e-06	0.511765	0.8458	0.718656	-6.93409	-9.22163	1757.68	5.14678e-09	1.19244e-07	1.26313e-06	2.32695e-08	1.81058e-07	6.2719e-07	2.23894e-06	223320	0.402451	8.27383e-07	280629	20867.9
1487	26	25	49	1.25	1.45	5.9	15	73	0.1	clay (light)	0.2	24	2.494	1.32673	1.25893e-06	0.07585	2.14329e-05	0.402126	0.796325	0.979108	-6.63742	-8.87066	1638.85	9.83242e-09	1.21386e-07	1.26403e-06	3.32872e-08	4.38553e-07	6.40886e-07	4.91323e-06	101766	0.397098	1.43694e-06	265800	15434.5
1488	26	25	49	1.25	1.45	5.9	15	73	0.1	clay (light)	0.2	24	2.494	1.32673	1.25893e-06	0.07585	2.14329e-05	0.402126	0.796325	0.979108	-6.63742	-8.87066	1638.85	9.83242e-09	1.21386e-07	1.26403e-06	3.32872e-08	4.38553e-07	6.40886e-07	4.91323e-06	101766	0.397098	1.43694e-06	265800	15434.5
1489	56	20	24	1.41	0.74	6.3	7	85	0.1	sandy clay loam	0.16	13	1.2728	1.04547	5.01187e-07	0.03195	3.25636e-06	0.511765	0.8458	0.718656	-6.93409	-9.22163	1757.68	5.14678e-09	1.19244e-07	1.26313e-06	2.32695e-08	1.81058e-07	6.2719e-07	2.23894e-06	223320	0.402451	8.27383e-07	280629	20867.9
1490	56	20	24	1.41	0.74	6.3	7	85	0.1	sandy clay loam	0.16	13	1.2728	1.04547	5.01187e-07	0.03195	3.25636e-06	0.511765	0.8458	0.718656	-6.93409	-9.22163	1757.68	5.14678e-09	1.19244e-07	1.26313e-06	2.32695e-08	1.81058e-07	6.2719e-07	2.23894e-06	223320	0.402451	8.27383e-07	280629	20867.9
1492	56	20	24	1.41	0.74	6.3	7	85	0.1	sandy clay loam	0.16	13	1.2728	1.04547	5.01187e-07	0.03195	3.25636e-06	0.511765	0.8458	0.718656	-6.93409	-9.22163	1757.68	5.14678e-09	1.19244e-07	1.26313e-06	2.32695e-08	1.81058e-07	6.2719e-07	2.23894e-06	223320	0.402451	8.27383e-07	280629	20867.9
1493	56	20	24	1.41	0.74	6.3	7	85	0.1	sandy clay loam	0.16	13	1.2728	1.04547	5.01187e-07	0.03195	3.25636e-06	0.511765	0.8458	0.718656	-6.93409	-9.22163	1757.68	5.14678e-09	1.19244e-07	1.26313e-06	2.32695e-08	1.81058e-07	6.2719e-07	2.23894e-06	223320	0.402451	8.27383e-07	280629	20867.9
1494	56	20	24	1.41	0.74	6.3	7	85	0.1	sandy clay loam	0.16	13	1.2728	1.04547	5.01187e-07	0.03195	3.25636e-06	0.511765	0.8458	0.718656	-6.93409	-9.22163	1757.68	5.14678e-09	1.19244e-07	1.26313e-06	2.32695e-08	1.81058e-07	6.2719e-07	2.23894e-06	223320	0.402451	8.27383e-07	280629	20867.9
1495	42	36	22	1.4	0.94	6.1	14	89	0.1	loam	0.32	23	1.6168	1.15532	7.94328e-07	0.10864	0.00048526	0.362288	0.775825	1.01296	-6.69982	-8.87571	1813.26	6.95947e-09	1.20073e-07	1.26348e-06	2.71449e-08	2.80673e-07	6.45309e-07	7.38569e-06	67698.5	0.447948	1.87691e-06	287407	16358.6
1496	36	19	45	1.28	0.99	6.4	24	99	0.1	clay (light)	0.2	24	1.7028	1.12075	3.98107e-07	0.24186	0.000635457	0.29747	0.738518	0.981621	-6.75223	-9.22112	2134.79	4.50937e-09	1.18953e-07	1.26301e-06	2.19067e-08	1.4603e-07	6.42458e-07	4.51476e-06	110748	0.399401	6.22534e-07	324773	8943.09
1498	42	36	22	1.4	0.94	6.1	14	89	0.1	loam	0.32	23	1.6168	1.15532	7.94328e-07	0.10864	0.00048526	0.362288	0.775825	1.01296	-6.69982	-8.87571	1813.26	6.95947e-09	1.20073e-07	1.26348e-06	2.71449e-08	2.80673e-07	6.45309e-07	7.38569e-06	67698.5	0.447948	1.87691e-06	287407	16358.6
1499	42	36	22	1.4	0.94	6.1	14	89	0.1	loam	0.32	23	1.6168	1.15532	7.94328e-07	0.10864	0.00048526	0.362288	0.775825	1.01296	-6.69982	-8.87571	1813.26	6.95947e-09	1.20073e-07	1.26348e-06	2.71449e-08	2.80673e-07	6.45309e-07	7.38569e-06	67698.5	0.447948	1.87691e-06	287407	16358.6
1500	42	36	22	1.4	0.94	6.1	14	89	0.1	loam	0.32	23	1.6168	1.15532	7.94328e-07	0.10864	0.00048526	0.362288	0.775825	1.01296	-6.69982	-8.87571	1813.26	6.95947e-09	1.20073e-07	1.26348e-06	2.71449e-08	2.80673e-07	6.45309e-07	7.38569e-06	67698.5	0.447948	1.87691e-06	287407	16358.6
1501	42	36	22	1.4	0.94	6.1	14	89	0.1	loam	0.32	23	1.6168	1.15532	7.94328e-07	0.10864	0.00048526	0.362288	0.775825	1.01296	-6.69982	-8.87571	1813.26	6.95947e-09	1.20073e-07	1.26348e-06	2.71449e-08	2.80673e-07	6.45309e-07	7.38569e-06	67698.5	0.447948	1.87691e-06	287407	16358.6
1502	42	36	22	1.4	0.94	6.1	14	89	0.1	loam	0.32	23	1.6168	1.15532	7.94328e-07	0.10864	0.00048526	0.362288	0.775825	1.01296	-6.69982	-8.87571	1813.26	6.95947e-09	1.20073e-07	1.26348e-06	2.71449e-08	2.80673e-07	6.45309e-07	7.38569e-06	67698.5	0.447948	1.87691e-06	287407	16358.6
1503	80	10	10	1.59	0.6	6.2	6	83	0.1	sandy loam	0.2	13	1.032	0.995986	6.30957e-07	0.02889	6.45133e-05	0.525075	0.851247	0.781577	-6.90993	-8.9896	1662.57	5.94924e-09	1.19611e-07	1.26329e-06	2.49851e-08	2.25157e-07	6.31105e-07	2.93695e-06	170244	0.465194	1.35377e-06	268798	28818.9
1504	42	36	22	1.4	0.94	6.1	14	89	0.1	loam	0.32	23	1.6168	1.15532	7.94328e-07	0.10864	0.00048526	0.362288	0.775825	1.01296	-6.69982	-8.87571	1813.26	6.95947e-09	1.20073e-07	1.26348e-06	2.71449e-08	2.80673e-07	6.45309e-07	7.38569e-06	67698.5	0.447948	1.87691e-06	287407	16358.6
1505	42	36	22	1.4	0.94	6.1	14	89	0.1	loam	0.32	23	1.6168	1.15532	7.94328e-07	0.10864	0.00048526	0.362288	0.775825	1.01296	-6.69982	-8.87571	1813.26	6.95947e-09	1.20073e-07	1.26348e-06	2.71449e-08	2.80673e-07	6.45309e-07	7.38569e-06	67698.5	0.447948	1.87691e-06	287407	16358.6
1506	42	36	22	1.4	0.94	6.1	14	89	0.1	loam	0.32	23	1.6168	1.15532	7.94328e-07	0.10864	0.00048526	0.362288	0.775825	1.01296	-6.69982	-8.87571	1813.26	6.95947e-09	1.20073e-07	1.26348e-06	2.71449e-08	2.80673e-07	6.45309e-07	7.38569e-06	67698.5	0.447948	1.87691e-06	287407	16358.6
1508	42	36	22	1.4	0.94	6.1	14	89	0.1	loam	0.32	23	1.6168	1.15532	7.94328e-07	0.10864	0.00048526	0.362288	0.775825	1.01296	-6.69982	-8.87571	1813.26	6.95947e-09	1.20073e-07	1.26348e-06	2.71449e-08	2.80673e-07	6.45309e-07	7.38569e-06	67698.5	0.447948	1.87691e-06	287407	16358.6
1509	42	36	22	1.4	0.94	6.1	14	89	0.1	loam	0.32	23	1.6168	1.15532	7.94328e-07	0.10864	0.00048526	0.362288	0.775825	1.01296	-6.69982	-8.87571	1813.26	6.95947e-09	1.20073e-07	1.26348e-06	2.71449e-08	2.80673e-07	6.45309e-07	7.38569e-06	67698.5	0.447948	1.87691e-06	287407	16358.6
1510	42	36	22	1.4	0.94	6.1	14	89	0.1	loam	0.32	23	1.6168	1.15532	7.94328e-07	0.10864	0.00048526	0.362288	0.775825	1.01296	-6.69982	-8.87571	1813.26	6.95947e-09	1.20073e-07	1.26348e-06	2.71449e-08	2.80673e-07	6.45309e-07	7.38569e-06	67698.5	0.447948	1.87691e-06	287407	16358.6
1511	42	36	22	1.4	0.94	6.1	14	89	0.1	loam	0.32	23	1.6168	1.15532	7.94328e-07	0.10864	0.00048526	0.362288	0.775825	1.01296	-6.69982	-8.87571	1813.26	6.95947e-09	1.20073e-07	1.26348e-06	2.71449e-08	2.80673e-07	6.45309e-07	7.38569e-06	67698.5	0.447948	1.87691e-06	287407	16358.6
1512	42	36	22	1.4	0.94	6.1	14	89	0.1	loam	0.32	23	1.6168	1.15532	7.94328e-07	0.10864	0.00048526	0.362288	0.775825	1.01296	-6.69982	-8.87571	1813.26	6.95947e-09	1.20073e-07	1.26348e-06	2.71449e-08	2.80673e-07	6.45309e-07	7.38569e-06	67698.5	0.447948	1.87691e-06	287407	16358.6
1513	80	10	10	1.59	0.6	6.2	6	83	0.1	sandy loam	0.2	13	1.032	0.995986	6.30957e-07	0.02889	6.45133e-05	0.525075	0.851247	0.781577	-6.90993	-8.9896	1662.57	5.94924e-09	1.19611e-07	1.26329e-06	2.49851e-08	2.25157e-07	6.31105e-07	2.93695e-06	170244	0.465194	1.35377e-06	268798	28818.9
1514	42	36	22	1.4	0.94	6.1	14	89	0.1	loam	0.32	23	1.6168	1.15532	7.94328e-07	0.10864	0.00048526	0.362288	0.775825	1.01296	-6.69982	-8.87571	1813.26	6.95947e-09	1.20073e-07	1.26348e-06	2.71449e-08	2.80673e-07	6.45309e-07	7.38569e-06	67698.5	0.447948	1.87691e-06	287407	16358.6
1515	42	36	22	1.4	0.94	6.1	14	89	0.1	loam	0.32	23	1.6168	1.15532	7.94328e-07	0.10864	0.00048526	0.362288	0.775825	1.01296	-6.69982	-8.87571	1813.26	6.95947e-09	1.20073e-07	1.26348e-06	2.71449e-08	2.80673e-07	6.45309e-07	7.38569e-06	67698.5	0.447948	1.87691e-06	287407	16358.6
1516	36	19	45	1.28	0.99	6.4	24	99	0.1	clay (light)	0.2	24	1.7028	1.12075	3.98107e-07	0.24186	0.000635457	0.29747	0.738518	0.981621	-6.75223	-9.22112	2134.79	4.50937e-09	1.18953e-07	1.26301e-06	2.19067e-08	1.4603e-07	6.42458e-07	4.51476e-06	110748	0.399401	6.22534e-07	324773	8943.09
1517	42	36	22	1.4	0.94	6.1	14	89	0.1	loam	0.32	23	1.6168	1.15532	7.94328e-07	0.10864	0.00048526	0.362288	0.775825	1.01296	-6.69982	-8.87571	1813.26	6.95947e-09	1.20073e-07	1.26348e-06	2.71449e-08	2.80673e-07	6.45309e-07	7.38569e-06	67698.5	0.447948	1.87691e-06	287407	16358.6
1519	36	19	45	1.28	0.99	6.4	24	99	0.1	clay (light)	0.2	24	1.7028	1.12075	3.98107e-07	0.24186	0.000635457	0.29747	0.738518	0.981621	-6.75223	-9.22112	2134.79	4.50937e-09	1.18953e-07	1.26301e-06	2.19067e-08	1.4603e-07	6.42458e-07	4.51476e-06	110748	0.399401	6.22534e-07	324773	8943.09
1520	42	36	22	1.4	0.94	6.1	14	89	0.1	loam	0.32	23	1.6168	1.15532	7.94328e-07	0.10864	0.00048526	0.362288	0.775825	1.01296	-6.69982	-8.87571	1813.26	6.95947e-09	1.20073e-07	1.26348e-06	2.71449e-08	2.80673e-07	6.45309e-07	7.38569e-06	67698.5	0.447948	1.87691e-06	287407	16358.6
1521	80	10	10	1.59	0.6	6.2	6	83	0.1	sandy loam	0.2	13	1.032	0.995986	6.30957e-07	0.02889	6.45133e-05	0.525075	0.851247	0.781577	-6.90993	-8.9896	1662.57	5.94924e-09	1.19611e-07	1.26329e-06	2.49851e-08	2.25157e-07	6.31105e-07	2.93695e-06	170244	0.465194	1.35377e-06	268798	28818.9
1522	42	36	22	1.4	0.94	6.1	14	89	0.1	loam	0.32	23	1.6168	1.15532	7.94328e-07	0.10864	0.00048526	0.362288	0.775825	1.01296	-6.69982	-8.87571	1813.26	6.95947e-09	1.20073e-07	1.26348e-06	2.71449e-08	2.80673e-07	6.45309e-07	7.38569e-06	67698.5	0.447948	1.87691e-06	287407	16358.6
1523	80	10	10	1.59	0.6	6.2	6	83	0.1	sandy loam	0.2	13	1.032	0.995986	6.30957e-07	0.02889	6.45133e-05	0.525075	0.851247	0.781577	-6.90993	-8.9896	1662.57	5.94924e-09	1.19611e-07	1.26329e-06	2.49851e-08	2.25157e-07	6.31105e-07	2.93695e-06	170244	0.465194	1.35377e-06	268798	28818.9
1524	47	32	21	1.41	0.82	6.2	11	88	0.1	loam	0.32	23	1.4104	1.09502	6.30957e-07	0.07371	0.000260118	0.405498	0.797989	1.01505	-6.72959	-8.92123	1941.93	5.94924e-09	1.19611e-07	1.26329e-06	2.49851e-08	2.25157e-07	6.36385e-07	6.0933e-06	82057.3	0.450109	1.67011e-06	302729	18673.9
1525	47	32	21	1.41	0.82	6.2	11	88	0.1	loam	0.32	23	1.4104	1.09502	6.30957e-07	0.07371	0.000260118	0.405498	0.797989	1.01505	-6.72959	-8.92123	1941.93	5.94924e-09	1.19611e-07	1.26329e-06	2.49851e-08	2.25157e-07	6.36385e-07	6.0933e-06	82057.3	0.450109	1.67011e-06	302729	18673.9
1526	47	32	21	1.41	0.82	6.2	11	88	0.1	loam	0.32	23	1.4104	1.09502	6.30957e-07	0.07371	0.000260118	0.405498	0.797989	1.01505	-6.72959	-8.92123	1941.93	5.94924e-09	1.19611e-07	1.26329e-06	2.49851e-08	2.25157e-07	6.36385e-07	6.0933e-06	82057.3	0.450109	1.67011e-06	302729	18673.9
1527	78	11	11	1.57	0.5	5.9	5	86	0.1	sandy loam	0.2	13	0.86	0.989184	1.25893e-06	0.01847	0.000140331	0.583871	0.874136	0.772678	-6.89847	-8.62634	1619.29	9.83242e-09	1.21386e-07	1.26403e-06	3.32872e-08	4.38553e-07	6.44096e-07	3.38668e-06	147637	0.455758	3.23002e-06	263313	57228
1536	78	11	11	1.57	0.5	5.9	5	86	0.1	sandy loam	0.2	13	0.86	0.989184	1.25893e-06	0.01847	0.000140331	0.583871	0.874136	0.772678	-6.89847	-8.62634	1619.29	9.83242e-09	1.21386e-07	1.26403e-06	3.32872e-08	4.38553e-07	6.44096e-07	3.38668e-06	147637	0.455758	3.23002e-06	263313	57228
1539	78	11	11	1.57	0.5	5.9	5	86	0.1	sandy loam	0.2	13	0.86	0.989184	1.25893e-06	0.01847	0.000140331	0.583871	0.874136	0.772678	-6.89847	-8.62634	1619.29	9.83242e-09	1.21386e-07	1.26403e-06	3.32872e-08	4.38553e-07	6.44096e-07	3.38668e-06	147637	0.455758	3.23002e-06	263313	57228
1540	78	11	11	1.57	0.5	5.9	5	86	0.1	sandy loam	0.2	13	0.86	0.989184	1.25893e-06	0.01847	0.000140331	0.583871	0.874136	0.772678	-6.89847	-8.62634	1619.29	9.83242e-09	1.21386e-07	1.26403e-06	3.32872e-08	4.38553e-07	6.44096e-07	3.38668e-06	147637	0.455758	3.23002e-06	263313	57228
1544	44	33	23	1.39	0.99	4.9	9	51	0.1	loam	0.32	23	1.7028	1.37575	1.25893e-05	0.02294	0.000113525	0.555529	0.86333	1.01017	-6.53365	-7.698	1236.78	7.98957e-08	1.53411e-07	1.27738e-06	1.8308e-07	4.28882e-06	8.40837e-07	1.70843e-05	29266.7	0.445086	2.86453e-05	211946	79085.5
1545	44	33	23	1.39	0.99	4.9	9	51	0.1	loam	0.32	23	1.7028	1.37575	1.25893e-05	0.02294	0.000113525	0.555529	0.86333	1.01017	-6.53365	-7.698	1236.78	7.98957e-08	1.53411e-07	1.27738e-06	1.8308e-07	4.28882e-06	8.40837e-07	1.70843e-05	29266.7	0.445086	2.86453e-05	211946	79085.5
1546	22	23	55	1.22	1.32	5.6	14	61	0.1	clay (light)	0.2	24	2.2704	1.34795	2.51189e-06	0.06067	2.35108e-06	0.429065	0.809339	0.969592	-6.61494	-8.54206	1556.19	1.75803e-08	1.24927e-07	1.2655e-06	4.98519e-08	8.64331e-07	6.62208e-07	6.13968e-06	81437.4	0.388491	3.20703e-06	255205	25893.9
1547	44	33	23	1.39	0.99	4.9	9	51	0.1	loam	0.32	23	1.7028	1.37575	1.25893e-05	0.02294	0.000113525	0.555529	0.86333	1.01017	-6.53365	-7.698	1236.78	7.98957e-08	1.53411e-07	1.27738e-06	1.8308e-07	4.28882e-06	8.40837e-07	1.70843e-05	29266.7	0.445086	2.86453e-05	211946	79085.5
1548	44	33	23	1.39	0.99	4.9	9	51	0.1	loam	0.32	23	1.7028	1.37575	1.25893e-05	0.02294	0.000113525	0.555529	0.86333	1.01017	-6.53365	-7.698	1236.78	7.98957e-08	1.53411e-07	1.27738e-06	1.8308e-07	4.28882e-06	8.40837e-07	1.70843e-05	29266.7	0.445086	2.86453e-05	211946	79085.5
1549	76	13	11	1.56	0.61	5.5	4	73	0.1	sandy loam	0.2	13	1.0492	1.12023	3.16228e-06	0.00471811	5.40013e-07	0.743475	0.928574	0.774664	-6.81793	-8.30159	1345.21	2.16021e-08	1.26766e-07	1.26627e-06	5.84503e-08	1.08535e-06	6.73494e-07	3.93221e-06	127155	0.457848	6.83506e-06	227060	90351.9
1550	44	33	23	1.39	0.99	4.9	9	51	0.1	loam	0.32	23	1.7028	1.37575	1.25893e-05	0.02294	0.000113525	0.555529	0.86333	1.01017	-6.53365	-7.698	1236.78	7.98957e-08	1.53411e-07	1.27738e-06	1.8308e-07	4.28882e-06	8.40837e-07	1.70843e-05	29266.7	0.445086	2.86453e-05	211946	79085.5
1552	76	13	11	1.56	0.61	5.5	4	73	0.1	sandy loam	0.2	13	1.0492	1.12023	3.16228e-06	0.00471811	5.40013e-07	0.743475	0.928574	0.774664	-6.81793	-8.30159	1345.21	2.16021e-08	1.26766e-07	1.26627e-06	5.84503e-08	1.08535e-06	6.73494e-07	3.93221e-06	127155	0.457848	6.83506e-06	227060	90351.9
1553	44	33	23	1.39	0.99	4.9	9	51	0.1	loam	0.32	23	1.7028	1.37575	1.25893e-05	0.02294	0.000113525	0.555529	0.86333	1.01017	-6.53365	-7.698	1236.78	7.98957e-08	1.53411e-07	1.27738e-06	1.8308e-07	4.28882e-06	8.40837e-07	1.70843e-05	29266.7	0.445086	2.86453e-05	211946	79085.5
1554	76	13	11	1.56	0.61	5.5	4	73	0.1	sandy loam	0.2	13	1.0492	1.12023	3.16228e-06	0.00471811	5.40013e-07	0.743475	0.928574	0.774664	-6.81793	-8.30159	1345.21	2.16021e-08	1.26766e-07	1.26627e-06	5.84503e-08	1.08535e-06	6.73494e-07	3.93221e-06	127155	0.457848	6.83506e-06	227060	90351.9
1555	44	33	23	1.39	0.99	4.9	9	51	0.1	loam	0.32	23	1.7028	1.37575	1.25893e-05	0.02294	0.000113525	0.555529	0.86333	1.01017	-6.53365	-7.698	1236.78	7.98957e-08	1.53411e-07	1.27738e-06	1.8308e-07	4.28882e-06	8.40837e-07	1.70843e-05	29266.7	0.445086	2.86453e-05	211946	79085.5
1556	76	13	11	1.56	0.61	5.5	4	73	0.1	sandy loam	0.2	13	1.0492	1.12023	3.16228e-06	0.00471811	5.40013e-07	0.743475	0.928574	0.774664	-6.81793	-8.30159	1345.21	2.16021e-08	1.26766e-07	1.26627e-06	5.84503e-08	1.08535e-06	6.73494e-07	3.93221e-06	127155	0.457848	6.83506e-06	227060	90351.9
1557	76	13	11	1.56	0.61	5.5	4	73	0.1	sandy loam	0.2	13	1.0492	1.12023	3.16228e-06	0.00471811	5.40013e-07	0.743475	0.928574	0.774664	-6.81793	-8.30159	1345.21	2.16021e-08	1.26766e-07	1.26627e-06	5.84503e-08	1.08535e-06	6.73494e-07	3.93221e-06	127155	0.457848	6.83506e-06	227060	90351.9
1558	76	13	11	1.56	0.61	5.5	4	73	0.1	sandy loam	0.2	13	1.0492	1.12023	3.16228e-06	0.00471811	5.40013e-07	0.743475	0.928574	0.774664	-6.81793	-8.30159	1345.21	2.16021e-08	1.26766e-07	1.26627e-06	5.84503e-08	1.08535e-06	6.73494e-07	3.93221e-06	127155	0.457848	6.83506e-06	227060	90351.9
1559	44	33	23	1.39	0.99	4.9	9	51	0.1	loam	0.32	23	1.7028	1.37575	1.25893e-05	0.02294	0.000113525	0.555529	0.86333	1.01017	-6.53365	-7.698	1236.78	7.98957e-08	1.53411e-07	1.27738e-06	1.8308e-07	4.28882e-06	8.40837e-07	1.70843e-05	29266.7	0.445086	2.86453e-05	211946	79085.5
1560	76	13	11	1.56	0.61	5.5	4	73	0.1	sandy loam	0.2	13	1.0492	1.12023	3.16228e-06	0.00471811	5.40013e-07	0.743475	0.928574	0.774664	-6.81793	-8.30159	1345.21	2.16021e-08	1.26766e-07	1.26627e-06	5.84503e-08	1.08535e-06	6.73494e-07	3.93221e-06	127155	0.457848	6.83506e-06	227060	90351.9
1561	76	13	11	1.56	0.61	5.5	4	73	0.1	sandy loam	0.2	13	1.0492	1.12023	3.16228e-06	0.00471811	5.40013e-07	0.743475	0.928574	0.774664	-6.81793	-8.30159	1345.21	2.16021e-08	1.26766e-07	1.26627e-06	5.84503e-08	1.08535e-06	6.73494e-07	3.93221e-06	127155	0.457848	6.83506e-06	227060	90351.9
1562	44	33	23	1.39	0.99	4.9	9	51	0.1	loam	0.32	23	1.7028	1.37575	1.25893e-05	0.02294	0.000113525	0.555529	0.86333	1.01017	-6.53365	-7.698	1236.78	7.98957e-08	1.53411e-07	1.27738e-06	1.8308e-07	4.28882e-06	8.40837e-07	1.70843e-05	29266.7	0.445086	2.86453e-05	211946	79085.5
1563	44	33	23	1.39	0.99	4.9	9	51	0.1	loam	0.32	23	1.7028	1.37575	1.25893e-05	0.02294	0.000113525	0.555529	0.86333	1.01017	-6.53365	-7.698	1236.78	7.98957e-08	1.53411e-07	1.27738e-06	1.8308e-07	4.28882e-06	8.40837e-07	1.70843e-05	29266.7	0.445086	2.86453e-05	211946	79085.5
1564	44	33	23	1.39	0.99	4.9	9	51	0.1	loam	0.32	23	1.7028	1.37575	1.25893e-05	0.02294	0.000113525	0.555529	0.86333	1.01017	-6.53365	-7.698	1236.78	7.98957e-08	1.53411e-07	1.27738e-06	1.8308e-07	4.28882e-06	8.40837e-07	1.70843e-05	29266.7	0.445086	2.86453e-05	211946	79085.5
1565	44	33	23	1.39	0.99	4.9	9	51	0.1	loam	0.32	23	1.7028	1.37575	1.25893e-05	0.02294	0.000113525	0.555529	0.86333	1.01017	-6.53365	-7.698	1236.78	7.98957e-08	1.53411e-07	1.27738e-06	1.8308e-07	4.28882e-06	8.40837e-07	1.70843e-05	29266.7	0.445086	2.86453e-05	211946	79085.5
1566	44	33	23	1.39	0.99	4.9	9	51	0.1	loam	0.32	23	1.7028	1.37575	1.25893e-05	0.02294	0.000113525	0.555529	0.86333	1.01017	-6.53365	-7.698	1236.78	7.98957e-08	1.53411e-07	1.27738e-06	1.8308e-07	4.28882e-06	8.40837e-07	1.70843e-05	29266.7	0.445086	2.86453e-05	211946	79085.5
1567	76	13	11	1.56	0.61	5.5	4	73	0.1	sandy loam	0.2	13	1.0492	1.12023	3.16228e-06	0.00471811	5.40013e-07	0.743475	0.928574	0.774664	-6.81793	-8.30159	1345.21	2.16021e-08	1.26766e-07	1.26627e-06	5.84503e-08	1.08535e-06	6.73494e-07	3.93221e-06	127155	0.457848	6.83506e-06	227060	90351.9
1568	22	23	55	1.22	1.32	5.6	14	61	0.1	clay (light)	0.2	24	2.2704	1.34795	2.51189e-06	0.06067	2.35108e-06	0.429065	0.809339	0.969592	-6.61494	-8.54206	1556.19	1.75803e-08	1.24927e-07	1.2655e-06	4.98519e-08	8.64331e-07	6.62208e-07	6.13968e-06	81437.4	0.388491	3.20703e-06	255205	25893.9
1569	22	23	55	1.22	1.32	5.6	14	61	0.1	clay (light)	0.2	24	2.2704	1.34795	2.51189e-06	0.06067	2.35108e-06	0.429065	0.809339	0.969592	-6.61494	-8.54206	1556.19	1.75803e-08	1.24927e-07	1.2655e-06	4.98519e-08	8.64331e-07	6.62208e-07	6.13968e-06	81437.4	0.388491	3.20703e-06	255205	25893.9
1570	44	33	23	1.39	0.99	4.9	9	51	0.1	loam	0.32	23	1.7028	1.37575	1.25893e-05	0.02294	0.000113525	0.555529	0.86333	1.01017	-6.53365	-7.698	1236.78	7.98957e-08	1.53411e-07	1.27738e-06	1.8308e-07	4.28882e-06	8.40837e-07	1.70843e-05	29266.7	0.445086	2.86453e-05	211946	79085.5
1571	44	33	23	1.39	0.99	4.9	9	51	0.1	loam	0.32	23	1.7028	1.37575	1.25893e-05	0.02294	0.000113525	0.555529	0.86333	1.01017	-6.53365	-7.698	1236.78	7.98957e-08	1.53411e-07	1.27738e-06	1.8308e-07	4.28882e-06	8.40837e-07	1.70843e-05	29266.7	0.445086	2.86453e-05	211946	79085.5
1572	76	13	11	1.56	0.61	5.5	4	73	0.1	sandy loam	0.2	13	1.0492	1.12023	3.16228e-06	0.00471811	5.40013e-07	0.743475	0.928574	0.774664	-6.81793	-8.30159	1345.21	2.16021e-08	1.26766e-07	1.26627e-06	5.84503e-08	1.08535e-06	6.73494e-07	3.93221e-06	127155	0.457848	6.83506e-06	227060	90351.9
1573	44	33	23	1.39	0.99	4.9	9	51	0.1	loam	0.32	23	1.7028	1.37575	1.25893e-05	0.02294	0.000113525	0.555529	0.86333	1.01017	-6.53365	-7.698	1236.78	7.98957e-08	1.53411e-07	1.27738e-06	1.8308e-07	4.28882e-06	8.40837e-07	1.70843e-05	29266.7	0.445086	2.86453e-05	211946	79085.5
1574	44	33	23	1.39	0.99	4.9	9	51	0.1	loam	0.32	23	1.7028	1.37575	1.25893e-05	0.02294	0.000113525	0.555529	0.86333	1.01017	-6.53365	-7.698	1236.78	7.98957e-08	1.53411e-07	1.27738e-06	1.8308e-07	4.28882e-06	8.40837e-07	1.70843e-05	29266.7	0.445086	2.86453e-05	211946	79085.5
1576	76	13	11	1.56	0.61	5.5	4	73	0.1	sandy loam	0.2	13	1.0492	1.12023	3.16228e-06	0.00471811	5.40013e-07	0.743475	0.928574	0.774664	-6.81793	-8.30159	1345.21	2.16021e-08	1.26766e-07	1.26627e-06	5.84503e-08	1.08535e-06	6.73494e-07	3.93221e-06	127155	0.457848	6.83506e-06	227060	90351.9
1577	49	28	23	1.4	0.58	6.2	9	81	0.1	loam	0.32	23	0.9976	0.985238	6.30957e-07	0.05378	0.000187204	0.444128	0.816351	1.00483	-6.78034	-8.79566	2182.64	5.94924e-09	1.19611e-07	1.26329e-06	2.49851e-08	2.25157e-07	6.34417e-07	5.56044e-06	89920.9	0.439646	2.29943e-06	330078	30005.5
1578	49	28	23	1.4	0.58	6.2	9	81	0.1	loam	0.32	23	0.9976	0.985238	6.30957e-07	0.05378	0.000187204	0.444128	0.816351	1.00483	-6.78034	-8.79566	2182.64	5.94924e-09	1.19611e-07	1.26329e-06	2.49851e-08	2.25157e-07	6.34417e-07	5.56044e-06	89920.9	0.439646	2.29943e-06	330078	30005.5
1579	49	28	23	1.4	0.58	6.2	9	81	0.1	loam	0.32	23	0.9976	0.985238	6.30957e-07	0.05378	0.000187204	0.444128	0.816351	1.00483	-6.78034	-8.79566	2182.64	5.94924e-09	1.19611e-07	1.26329e-06	2.49851e-08	2.25157e-07	6.34417e-07	5.56044e-06	89920.9	0.439646	2.29943e-06	330078	30005.5
1580	17	27	56	1.21	1.74	6	15	72	0.1	clay (light)	0.2	24	2.9928	1.36754	1e-06	0.07503	1.65002e-07	0.403404	0.796957	0.971013	-6.63221	-9.04769	1619.32	8.23128e-09	1.20654e-07	1.26372e-06	2.9864e-08	3.50564e-07	6.358e-07	4.48774e-06	111415	0.389764	1.00607e-06	263318	11504.2
1581	49	28	23	1.4	0.58	6.2	9	81	0.1	loam	0.32	23	0.9976	0.985238	6.30957e-07	0.05378	0.000187204	0.444128	0.816351	1.00483	-6.78034	-8.79566	2182.64	5.94924e-09	1.19611e-07	1.26329e-06	2.49851e-08	2.25157e-07	6.34417e-07	5.56044e-06	89920.9	0.439646	2.29943e-06	330078	30005.5
1582	49	28	23	1.4	0.58	6.2	9	81	0.1	loam	0.32	23	0.9976	0.985238	6.30957e-07	0.05378	0.000187204	0.444128	0.816351	1.00483	-6.78034	-8.79566	2182.64	5.94924e-09	1.19611e-07	1.26329e-06	2.49851e-08	2.25157e-07	6.34417e-07	5.56044e-06	89920.9	0.439646	2.29943e-06	330078	30005.5
1583	49	28	23	1.4	0.58	6.2	9	81	0.1	loam	0.32	23	0.9976	0.985238	6.30957e-07	0.05378	0.000187204	0.444128	0.816351	1.00483	-6.78034	-8.79566	2182.64	5.94924e-09	1.19611e-07	1.26329e-06	2.49851e-08	2.25157e-07	6.34417e-07	5.56044e-06	89920.9	0.439646	2.29943e-06	330078	30005.5
1584	49	28	23	1.4	0.58	6.2	9	81	0.1	loam	0.32	23	0.9976	0.985238	6.30957e-07	0.05378	0.000187204	0.444128	0.816351	1.00483	-6.78034	-8.79566	2182.64	5.94924e-09	1.19611e-07	1.26329e-06	2.49851e-08	2.25157e-07	6.34417e-07	5.56044e-06	89920.9	0.439646	2.29943e-06	330078	30005.5
1585	81	7	12	1.56	0.53	6.3	6	73	0.1	sandy loam	0.2	13	0.9116	0.939657	5.01187e-07	0.02897	2.57854e-05	0.524709	0.851098	0.766798	-6.94821	-9.05362	1815.78	5.14678e-09	1.19244e-07	1.26313e-06	2.32695e-08	1.81058e-07	6.27798e-07	2.73007e-06	183145	0.44963	1.2319e-06	287712	29186.6
1586	49	28	23	1.4	0.58	6.2	9	81	0.1	loam	0.32	23	0.9976	0.985238	6.30957e-07	0.05378	0.000187204	0.444128	0.816351	1.00483	-6.78034	-8.79566	2182.64	5.94924e-09	1.19611e-07	1.26329e-06	2.49851e-08	2.25157e-07	6.34417e-07	5.56044e-06	89920.9	0.439646	2.29943e-06	330078	30005.5
1587	49	28	23	1.4	0.58	6.2	9	81	0.1	loam	0.32	23	0.9976	0.985238	6.30957e-07	0.05378	0.000187204	0.444128	0.816351	1.00483	-6.78034	-8.79566	2182.64	5.94924e-09	1.19611e-07	1.26329e-06	2.49851e-08	2.25157e-07	6.34417e-07	5.56044e-06	89920.9	0.439646	2.29943e-06	330078	30005.5
1588	17	27	56	1.21	1.74	6	15	72	0.1	clay (light)	0.2	24	2.9928	1.36754	1e-06	0.07503	1.65002e-07	0.403404	0.796957	0.971013	-6.63221	-9.04769	1619.32	8.23128e-09	1.20654e-07	1.26372e-06	2.9864e-08	3.50564e-07	6.358e-07	4.48774e-06	111415	0.389764	1.00607e-06	145535	6358.3
1589	49	28	23	1.4	0.58	6.2	9	81	0.1	loam	0.32	23	0.9976	0.985238	6.30957e-07	0.05378	0.000187204	0.444128	0.816351	1.00483	-6.78034	-8.79566	2182.64	5.94924e-09	1.19611e-07	1.26329e-06	2.49851e-08	2.25157e-07	6.34417e-07	5.56044e-06	89920.9	0.439646	2.29943e-06	330078	30005.5
1590	49	28	23	1.4	0.58	6.2	9	81	0.1	loam	0.32	23	0.9976	0.985238	6.30957e-07	0.05378	0.000187204	0.444128	0.816351	1.00483	-6.78034	-8.79566	2182.64	5.94924e-09	1.19611e-07	1.26329e-06	2.49851e-08	2.25157e-07	6.34417e-07	5.56044e-06	89920.9	0.439646	2.29943e-06	330078	30005.5
1591	49	28	23	1.4	0.58	6.2	9	81	0.1	loam	0.32	23	0.9976	0.985238	6.30957e-07	0.05378	0.000187204	0.444128	0.816351	1.00483	-6.78034	-8.79566	2182.64	5.94924e-09	1.19611e-07	1.26329e-06	2.49851e-08	2.25157e-07	6.34417e-07	5.56044e-06	89920.9	0.439646	2.29943e-06	330078	30005.5
1592	49	28	23	1.4	0.58	6.2	9	81	0.1	loam	0.32	23	0.9976	0.985238	6.30957e-07	0.05378	0.000187204	0.444128	0.816351	1.00483	-6.78034	-8.79566	2182.64	5.94924e-09	1.19611e-07	1.26329e-06	2.49851e-08	2.25157e-07	6.34417e-07	5.56044e-06	89920.9	0.439646	2.29943e-06	330078	30005.5
1593	45	30	25	1.38	2.6	5.3	20	61	0.1	loam	0.32	23	4.472	1.61387	5.01187e-06	0.10173	4.42227e-05	0.369191	0.779494	1.01362	-6.46088	-8.46841	1045.98	3.30394e-08	1.31993e-07	1.26845e-06	8.29028e-08	1.71387e-06	7.06907e-07	1.57924e-05	31660.8	0.448638	4.85649e-06	184199	12706.6
1594	45	30	25	1.38	2.6	5.3	20	61	0.1	loam	0.32	23	4.472	1.61387	5.01187e-06	0.10173	4.42227e-05	0.369191	0.779494	1.01362	-6.46088	-8.46841	1045.98	3.30394e-08	1.31993e-07	1.26845e-06	8.29028e-08	1.71387e-06	7.06907e-07	1.57924e-05	31660.8	0.448638	4.85649e-06	184199	12706.6
1595	45	30	25	1.38	2.6	5.3	20	61	0.1	loam	0.32	23	4.472	1.61387	5.01187e-06	0.10173	4.42227e-05	0.369191	0.779494	1.01362	-6.46088	-8.46841	1045.98	3.30394e-08	1.31993e-07	1.26845e-06	8.29028e-08	1.71387e-06	7.06907e-07	1.57924e-05	31660.8	0.448638	4.85649e-06	184199	12706.6
1596	26	33	41	1.27	30.73	4.4	77	58	0.1	clay (light)	0.2	16	52.8556	2.54986	3.98107e-05	0.43119	2.13795e-11	0.283892	0.729942	0.819991	-6.13796	-8.67986	345.929	2.48224e-07	2.30352e-07	1.30945e-06	5.42959e-07	1.35391e-05	1.31219e-06	4.24045e-05	11791.2	0.412925	3.16566e-06	67801.6	1045.04
1598	89	6	5	1.7	0.4	6.4	3	100	0.1	sand	0.1	13	0.688	0.83344	3.98107e-07	0.0081224	4.87455e-06	0.684976	0.909743	0.829003	-6.96058	-8.99446	1868.24	4.50937e-09	1.18953e-07	1.26301e-06	2.19067e-08	1.4603e-07	6.25437e-07	9.75955e-07	512319	0.518872	5.61272e-07	294016	43867.7
1599	89	6	5	1.7	0.4	6.4	3	100	0.1	sand	0.1	13	0.688	0.83344	3.98107e-07	0.0081224	4.87455e-06	0.684976	0.909743	0.829003	-6.96058	-8.99446	1868.24	4.50937e-09	1.18953e-07	1.26301e-06	2.19067e-08	1.4603e-07	6.25437e-07	9.75955e-07	512319	0.518872	5.61272e-07	294016	43867.7
1600	89	6	5	1.7	0.4	6.4	3	100	0.1	sand	0.1	13	0.688	0.83344	3.98107e-07	0.0081224	4.87455e-06	0.684976	0.909743	0.829003	-6.96058	-8.99446	1868.24	4.50937e-09	1.18953e-07	1.26301e-06	2.19067e-08	1.4603e-07	6.25437e-07	9.75955e-07	512319	0.518872	5.61272e-07	294016	43867.7
1602	89	6	5	1.7	0.4	6.4	3	100	0.1	sand	0.1	13	0.688	0.83344	3.98107e-07	0.0081224	4.87455e-06	0.684976	0.909743	0.829003	-6.96058	-8.99446	1868.24	4.50937e-09	1.18953e-07	1.26301e-06	2.19067e-08	1.4603e-07	6.25437e-07	9.75955e-07	512319	0.518872	5.61272e-07	294016	43867.7
1604	89	6	5	1.7	0.4	6.4	3	100	0.1	sand	0.1	13	0.688	0.83344	3.98107e-07	0.0081224	4.87455e-06	0.684976	0.909743	0.829003	-6.96058	-8.99446	1868.24	4.50937e-09	1.18953e-07	1.26301e-06	2.19067e-08	1.4603e-07	6.25437e-07	9.75955e-07	512319	0.518872	5.61272e-07	294016	43867.7
1605	89	6	5	1.7	0.4	6.4	3	100	0.1	sand	0.1	13	0.688	0.83344	3.98107e-07	0.0081224	4.87455e-06	0.684976	0.909743	0.829003	-6.96058	-8.99446	1868.24	4.50937e-09	1.18953e-07	1.26301e-06	2.19067e-08	1.4603e-07	6.25437e-07	9.75955e-07	512319	0.518872	5.61272e-07	294016	43867.7
1606	89	6	5	1.7	0.4	6.4	3	100	0.1	sand	0.1	13	0.688	0.83344	3.98107e-07	0.0081224	4.87455e-06	0.684976	0.909743	0.829003	-6.96058	-8.99446	1868.24	4.50937e-09	1.18953e-07	1.26301e-06	2.19067e-08	1.4603e-07	6.25437e-07	9.75955e-07	512319	0.518872	5.61272e-07	294016	43867.7
1607	89	6	5	1.7	0.4	6.4	3	100	0.1	sand	0.1	13	0.688	0.83344	3.98107e-07	0.0081224	4.87455e-06	0.684976	0.909743	0.829003	-6.96058	-8.99446	1868.24	4.50937e-09	1.18953e-07	1.26301e-06	2.19067e-08	1.4603e-07	6.25437e-07	9.75955e-07	512319	0.518872	5.61272e-07	294016	43867.7
1608	89	5	6	1.68	0.4	5.6	2	71	0.1	sand	0.1	13	0.688	0.96944	2.51189e-06	6.03449e-05	2.25338e-08	0.964385	0.990975	0.815463	-6.86126	-8.20543	1486.33	1.75803e-08	1.24927e-07	1.2655e-06	4.98519e-08	8.64331e-07	6.62145e-07	1.36578e-06	366091	0.502944	3.60484e-06	246065	163322
1609	89	5	6	1.68	0.4	5.6	2	71	0.1	sand	0.1	13	0.688	0.96944	2.51189e-06	6.03449e-05	2.25338e-08	0.964385	0.990975	0.815463	-6.86126	-8.20543	1486.33	1.75803e-08	1.24927e-07	1.2655e-06	4.98519e-08	8.64331e-07	6.62145e-07	1.36578e-06	366091	0.502944	3.60484e-06	246065	163322
1610	89	5	6	1.68	0.4	5.6	2	71	0.1	sand	0.1	13	0.688	0.96944	2.51189e-06	6.03449e-05	2.25338e-08	0.964385	0.990975	0.815463	-6.86126	-8.20543	1486.33	1.75803e-08	1.24927e-07	1.2655e-06	4.98519e-08	8.64331e-07	6.62145e-07	1.36578e-06	366091	0.502944	3.60484e-06	246065	163322
1611	89	5	6	1.68	0.4	5.6	2	71	0.1	sand	0.1	13	0.688	0.96944	2.51189e-06	6.03449e-05	2.25338e-08	0.964385	0.990975	0.815463	-6.86126	-8.20543	1486.33	1.75803e-08	1.24927e-07	1.2655e-06	4.98519e-08	8.64331e-07	6.62145e-07	1.36578e-06	366091	0.502944	3.60484e-06	246065	163322
1612	89	5	6	1.68	0.4	5.6	2	71	0.1	sand	0.1	13	0.688	0.96944	2.51189e-06	6.03449e-05	2.25338e-08	0.964385	0.990975	0.815463	-6.86126	-8.20543	1486.33	1.75803e-08	1.24927e-07	1.2655e-06	4.98519e-08	8.64331e-07	6.62145e-07	1.36578e-06	366091	0.502944	3.60484e-06	246065	163322
1613	90	5	5	1.71	0.35	5.7	2	80	0.1	sand	0.1	13	0.602	0.910105	0.01119	0.000101203	1.99526e-06	0.954255	0.988362	0.82767	-6.88457	-8.24393	1568.3	6.91973e-05	3.17462e-05	1.44474e-05	0.000147954	0.00380257	0.000195637	0.000820278	609.549	0.517281	3.15132e-06	256771	255.137
1614	90	5	5	1.71	0.35	5.7	2	80	0.1	sand	0.1	13	0.602	0.910105	0.01119	0.000101203	1.99526e-06	0.954255	0.988362	0.82767	-6.88457	-8.24393	1568.3	6.91973e-05	3.17462e-05	1.44474e-05	0.000147954	0.00380257	0.000195637	0.000820278	609.549	0.517281	3.15132e-06	256771	255.137
1615	90	5	5	1.71	0.35	5.7	2	80	0.1	sand	0.1	13	0.602	0.910105	0.01119	0.000101203	1.99526e-06	0.954255	0.988362	0.82767	-6.88457	-8.24393	1568.3	6.91973e-05	3.17462e-05	1.44474e-05	0.000147954	0.00380257	0.000195637	0.000820278	609.549	0.517281	3.15132e-06	256771	255.137
1616	90	5	5	1.71	0.35	5.7	2	80	0.1	sand	0.1	13	0.602	0.910105	0.01119	0.000101203	1.99526e-06	0.954255	0.988362	0.82767	-6.88457	-8.24393	1568.3	6.91973e-05	3.17462e-05	1.44474e-05	0.000147954	0.00380257	0.000195637	0.000820278	609.549	0.517281	3.15132e-06	256771	255.137
1617	90	5	5	1.71	0.35	5.7	2	80	0.1	sand	0.1	13	0.602	0.910105	0.01119	0.000101203	1.99526e-06	0.954255	0.988362	0.82767	-6.88457	-8.24393	1568.3	6.91973e-05	3.17462e-05	1.44474e-05	0.000147954	0.00380257	0.000195637	0.000820278	609.549	0.517281	3.15132e-06	256771	255.137
1618	90	5	5	1.71	0.35	5.7	2	80	0.1	sand	0.1	13	0.602	0.910105	0.01119	0.000101203	1.99526e-06	0.954255	0.988362	0.82767	-6.88457	-8.24393	1568.3	6.91973e-05	3.17462e-05	1.44474e-05	0.000147954	0.00380257	0.000195637	0.000820278	609.549	0.517281	3.15132e-06	256771	255.137
1620	90	5	5	1.71	0.35	5.7	2	80	0.1	sand	0.1	13	0.602	0.910105	0.01119	0.000101203	1.99526e-06	0.954255	0.988362	0.82767	-6.88457	-8.24393	1568.3	6.91973e-05	3.17462e-05	1.44474e-05	0.000147954	0.00380257	0.000195637	0.000820278	609.549	0.517281	3.15132e-06	256771	255.137
1621	90	5	5	1.71	0.35	5.7	2	80	0.1	sand	0.1	13	0.602	0.910105	0.01119	0.000101203	1.99526e-06	0.954255	0.988362	0.82767	-6.88457	-8.24393	1568.3	6.91973e-05	3.17462e-05	1.44474e-05	0.000147954	0.00380257	0.000195637	0.000820278	609.549	0.517281	3.15132e-06	256771	255.137
1622	90	5	5	1.71	0.35	5.7	2	80	0.1	sand	0.1	13	0.602	0.910105	0.01119	0.000101203	1.99526e-06	0.954255	0.988362	0.82767	-6.88457	-8.24393	1568.3	6.91973e-05	3.17462e-05	1.44474e-05	0.000147954	0.00380257	0.000195637	0.000820278	609.549	0.517281	3.15132e-06	256771	255.137
1623	90	5	5	1.71	0.35	5.7	2	80	0.1	sand	0.1	13	0.602	0.910105	0.01119	0.000101203	1.99526e-06	0.954255	0.988362	0.82767	-6.88457	-8.24393	1568.3	6.91973e-05	3.17462e-05	1.44474e-05	0.000147954	0.00380257	0.000195637	0.000820278	609.549	0.517281	3.15132e-06	256771	255.137
1624	90	5	5	1.71	0.35	5.7	2	80	0.1	sand	0.1	13	0.602	0.910105	0.01119	0.000101203	1.99526e-06	0.954255	0.988362	0.82767	-6.88457	-8.24393	1568.3	6.91973e-05	3.17462e-05	1.44474e-05	0.000147954	0.00380257	0.000195637	0.000820278	609.549	0.517281	3.15132e-06	256771	255.137
1625	90	5	5	1.71	0.35	5.7	2	80	0.1	sand	0.1	13	0.602	0.910105	0.01119	0.000101203	1.99526e-06	0.954255	0.988362	0.82767	-6.88457	-8.24393	1568.3	6.91973e-05	3.17462e-05	1.44474e-05	0.000147954	0.00380257	0.000195637	0.000820278	609.549	0.517281	3.15132e-06	256771	255.137
1626	90	5	5	1.71	0.35	5.7	2	80	0.1	sand	0.1	13	0.602	0.910105	0.01119	0.000101203	1.99526e-06	0.954255	0.988362	0.82767	-6.88457	-8.24393	1568.3	6.91973e-05	3.17462e-05	1.44474e-05	0.000147954	0.00380257	0.000195637	0.000820278	609.549	0.517281	3.15132e-06	256771	255.137
1627	90	5	5	1.71	0.35	5.7	2	80	0.1	sand	0.1	13	0.602	0.910105	0.01119	0.000101203	1.99526e-06	0.954255	0.988362	0.82767	-6.88457	-8.24393	1568.3	6.91973e-05	3.17462e-05	1.44474e-05	0.000147954	0.00380257	0.000195637	0.000820278	609.549	0.517281	3.15132e-06	256771	255.137
1628	90	5	5	1.71	0.35	5.7	2	80	0.1	sand	0.1	13	0.602	0.910105	0.01119	0.000101203	1.99526e-06	0.954255	0.988362	0.82767	-6.88457	-8.24393	1568.3	6.91973e-05	3.17462e-05	1.44474e-05	0.000147954	0.00380257	0.000195637	0.000820278	609.549	0.517281	3.15132e-06	256771	255.137
1629	90	5	5	1.71	0.35	5.7	2	80	0.1	sand	0.1	13	0.602	0.910105	0.01119	0.000101203	1.99526e-06	0.954255	0.988362	0.82767	-6.88457	-8.24393	1568.3	6.91973e-05	3.17462e-05	1.44474e-05	0.000147954	0.00380257	0.000195637	0.000820278	609.549	0.517281	3.15132e-06	256771	255.137
1630	90	5	5	1.71	0.35	5.7	2	80	0.1	sand	0.1	13	0.602	0.910105	0.01119	0.000101203	1.99526e-06	0.954255	0.988362	0.82767	-6.88457	-8.24393	1568.3	6.91973e-05	3.17462e-05	1.44474e-05	0.000147954	0.00380257	0.000195637	0.000820278	609.549	0.517281	3.15132e-06	256771	255.137
1631	90	5	5	1.71	0.35	5.7	2	80	0.1	sand	0.1	13	0.602	0.910105	0.01119	0.000101203	1.99526e-06	0.954255	0.988362	0.82767	-6.88457	-8.24393	1568.3	6.91973e-05	3.17462e-05	1.44474e-05	0.000147954	0.00380257	0.000195637	0.000820278	609.549	0.517281	3.15132e-06	256771	255.137
1632	90	5	5	1.71	0.35	5.7	2	80	0.1	sand	0.1	13	0.602	0.910105	0.01119	0.000101203	1.99526e-06	0.954255	0.988362	0.82767	-6.88457	-8.24393	1568.3	6.91973e-05	3.17462e-05	1.44474e-05	0.000147954	0.00380257	0.000195637	0.000820278	609.549	0.517281	3.15132e-06	256771	255.137
1633	90	5	5	1.71	0.35	5.7	2	80	0.1	sand	0.1	13	0.602	0.910105	0.01119	0.000101203	1.99526e-06	0.954255	0.988362	0.82767	-6.88457	-8.24393	1568.3	6.91973e-05	3.17462e-05	1.44474e-05	0.000147954	0.00380257	0.000195637	0.000820278	609.549	0.517281	3.15132e-06	256771	255.137
1634	90	5	5	1.71	0.35	5.7	2	80	0.1	sand	0.1	13	0.602	0.910105	0.01119	0.000101203	1.99526e-06	0.954255	0.988362	0.82767	-6.88457	-8.24393	1568.3	6.91973e-05	3.17462e-05	1.44474e-05	0.000147954	0.00380257	0.000195637	0.000820278	609.549	0.517281	3.15132e-06	256771	255.137
1637	90	5	5	1.71	0.35	5.7	2	80	0.1	sand	0.1	13	0.602	0.910105	0.01119	0.000101203	1.99526e-06	0.954255	0.988362	0.82767	-6.88457	-8.24393	1568.3	6.91973e-05	3.17462e-05	1.44474e-05	0.000147954	0.00380257	0.000195637	0.000820278	609.549	0.517281	3.15132e-06	256771	255.137
1638	90	5	5	1.71	0.35	5.7	2	80	0.1	sand	0.1	13	0.602	0.910105	0.01119	0.000101203	1.99526e-06	0.954255	0.988362	0.82767	-6.88457	-8.24393	1568.3	6.91973e-05	3.17462e-05	1.44474e-05	0.000147954	0.00380257	0.000195637	0.000820278	609.549	0.517281	3.15132e-06	256771	255.137
1639	44	36	20	1.41	1.12	6.4	11	76	0.1	loam	0.32	23	1.9264	1.15986	3.98107e-07	0.06278	4.27909e-06	0.424853	0.807346	1.02178	-6.71224	-9.23628	1865.85	4.50937e-09	1.18953e-07	1.26301e-06	2.19067e-08	1.4603e-07	6.25421e-07	5.03517e-06	99301.6	0.457147	7.96076e-07	293731	10614.9
1640	44	36	20	1.41	1.12	6.4	11	76	0.1	loam	0.32	23	1.9264	1.15986	3.98107e-07	0.06278	4.27909e-06	0.424853	0.807346	1.02178	-6.71224	-9.23628	1865.85	4.50937e-09	1.18953e-07	1.26301e-06	2.19067e-08	1.4603e-07	6.25421e-07	5.03517e-06	99301.6	0.457147	7.96076e-07	293731	10614.9
1647	82	10	8	1.62	0.7	5.4	4	38	0.1	loamy sand	0.17	13	1.204	1.18086	3.98107e-06	0.00423306	7.38789e-08	0.754212	0.931909	0.799689	-6.77176	-8.23451	1209.51	2.66652e-08	1.2908e-07	1.26723e-06	6.92751e-08	1.36359e-06	6.87751e-07	3.67087e-06	136208	0.485004	6.16343e-06	208073	84719.8
1648	82	10	8	1.62	0.7	5.4	4	38	0.1	loamy sand	0.17	13	1.204	1.18086	3.98107e-06	0.00423306	7.38789e-08	0.754212	0.931909	0.799689	-6.77176	-8.23451	1209.51	2.66652e-08	1.2908e-07	1.26723e-06	6.92751e-08	1.36359e-06	6.87751e-07	3.67087e-06	136208	0.485004	6.16343e-06	208073	84719.8
1650	82	10	8	1.62	0.7	5.4	4	38	0.1	loamy sand	0.17	13	1.204	1.18086	3.98107e-06	0.00423306	7.38789e-08	0.754212	0.931909	0.799689	-6.77176	-8.23451	1209.51	2.66652e-08	1.2908e-07	1.26723e-06	6.92751e-08	1.36359e-06	6.87751e-07	3.67087e-06	136208	0.485004	6.16343e-06	208073	84719.8
1652	82	10	8	1.62	0.7	5.4	4	38	0.1	loamy sand	0.17	13	1.204	1.18086	3.98107e-06	0.00423306	7.38789e-08	0.754212	0.931909	0.799689	-6.77176	-8.23451	1209.51	2.66652e-08	1.2908e-07	1.26723e-06	6.92751e-08	1.36359e-06	6.87751e-07	3.67087e-06	136208	0.485004	6.16343e-06	112100	45643
1653	82	10	8	1.62	0.7	5.4	4	38	0.1	loamy sand	0.17	13	1.204	1.18086	3.98107e-06	0.00423306	7.38789e-08	0.754212	0.931909	0.799689	-6.77176	-8.23451	1209.51	2.66652e-08	1.2908e-07	1.26723e-06	6.92751e-08	1.36359e-06	6.87751e-07	3.67087e-06	136208	0.485004	6.16343e-06	208073	84719.8
1654	42	37	21	1.4	1.37	5.1	11	22	0.1	loam	0.32	23	2.3564	1.44474	7.94328e-06	0.03455	2.07637e-06	0.501442	0.841502	1.02017	-6.51265	-8.01546	1178.39	5.11662e-08	1.40279e-07	1.2719e-06	1.21657e-07	2.71002e-06	7.56858e-07	1.47099e-05	33990.7	0.455454	1.33806e-05	203616	42178.4
1655	42	37	21	1.4	1.37	5.1	11	22	0.1	loam	0.32	23	2.3564	1.44474	7.94328e-06	0.03455	2.07637e-06	0.501442	0.841502	1.02017	-6.51265	-8.01546	1178.39	5.11662e-08	1.40279e-07	1.2719e-06	1.21657e-07	2.71002e-06	7.56858e-07	1.47099e-05	33990.7	0.455454	1.33806e-05	203616	42178.4
1656	82	10	8	1.62	0.7	5.4	4	38	0.1	loamy sand	0.17	13	1.204	1.18086	3.98107e-06	0.00423306	7.38789e-08	0.754212	0.931909	0.799689	-6.77176	-8.23451	1209.51	2.66652e-08	1.2908e-07	1.26723e-06	6.92751e-08	1.36359e-06	6.87751e-07	3.67087e-06	136208	0.485004	6.16343e-06	208073	84719.8
1657	82	10	8	1.62	0.7	5.4	4	38	0.1	loamy sand	0.17	13	1.204	1.18086	3.98107e-06	0.00423306	7.38789e-08	0.754212	0.931909	0.799689	-6.77176	-8.23451	1209.51	2.66652e-08	1.2908e-07	1.26723e-06	6.92751e-08	1.36359e-06	6.87751e-07	3.67087e-06	136208	0.485004	6.16343e-06	208073	84719.8
1659	47	34	19	1.43	0.97	6.4	12	79	0.1	loam	0.32	23	1.6684	1.11428	3.98107e-07	0.07639	9.23319e-05	0.401294	0.795913	1.02416	-6.72934	-9.17878	1940.8	4.50937e-09	1.18953e-07	1.26301e-06	2.19067e-08	1.4603e-07	6.27798e-07	5.33415e-06	93735.7	0.459651	8.91177e-07	302597	11618.8
1660	47	34	19	1.43	0.97	6.4	12	79	0.1	loam	0.32	23	1.6684	1.11428	3.98107e-07	0.07639	9.23319e-05	0.401294	0.795913	1.02416	-6.72934	-9.17878	1940.8	4.50937e-09	1.18953e-07	1.26301e-06	2.19067e-08	1.4603e-07	6.27798e-07	5.33415e-06	93735.7	0.459651	8.91177e-07	302597	11618.8
1661	47	34	19	1.43	0.97	6.4	12	79	0.1	loam	0.32	23	1.6684	1.11428	3.98107e-07	0.07639	9.23319e-05	0.401294	0.795913	1.02416	-6.72934	-9.17878	1940.8	4.50937e-09	1.18953e-07	1.26301e-06	2.19067e-08	1.4603e-07	6.27798e-07	5.33415e-06	93735.7	0.459651	8.91177e-07	302597	11618.8
1662	83	11	6	1.67	0.5	6.6	5	94	0.1	loamy sand	0.17	13	0.86	0.870184	2.51189e-07	0.02764	2.14133e-05	0.530925	0.853608	0.817692	-6.96547	-9.28987	1889.41	3.60088e-09	1.18537e-07	1.26284e-06	1.99644e-08	9.61045e-08	6.23323e-07	1.89114e-06	264390	0.505532	5.04957e-07	296536	20013.6
1664	83	11	6	1.67	0.5	6.6	5	94	0.1	loamy sand	0.17	13	0.86	0.870184	2.51189e-07	0.02764	2.14133e-05	0.530925	0.853608	0.817692	-6.96547	-9.28987	1889.41	3.60088e-09	1.18537e-07	1.26284e-06	1.99644e-08	9.61045e-08	6.23323e-07	1.89114e-06	264390	0.505532	5.04957e-07	296536	20013.6
1665	47	34	19	1.43	0.97	6.4	12	79	0.1	loam	0.32	23	1.6684	1.11428	3.98107e-07	0.07639	9.23319e-05	0.401294	0.795913	1.02416	-6.72934	-9.17878	1940.8	4.50937e-09	1.18953e-07	1.26301e-06	2.19067e-08	1.4603e-07	6.27798e-07	5.33415e-06	93735.7	0.459651	8.91177e-07	302597	11618.8
1666	47	34	19	1.43	0.97	6.4	12	79	0.1	loam	0.32	23	1.6684	1.11428	3.98107e-07	0.07639	9.23319e-05	0.401294	0.795913	1.02416	-6.72934	-9.17878	1940.8	4.50937e-09	1.18953e-07	1.26301e-06	2.19067e-08	1.4603e-07	6.27798e-07	5.33415e-06	93735.7	0.459651	8.91177e-07	302597	11618.8
1667	47	34	19	1.43	0.97	6.4	12	79	0.1	loam	0.32	23	1.6684	1.11428	3.98107e-07	0.07639	9.23319e-05	0.401294	0.795913	1.02416	-6.72934	-9.17878	1940.8	4.50937e-09	1.18953e-07	1.26301e-06	2.19067e-08	1.4603e-07	6.27798e-07	5.33415e-06	93735.7	0.459651	8.91177e-07	302597	11618.8
1668	83	11	6	1.67	0.5	6.6	5	94	0.1	loamy sand	0.17	13	0.86	0.870184	2.51189e-07	0.02764	2.14133e-05	0.530925	0.853608	0.817692	-6.96547	-9.28987	1889.41	3.60088e-09	1.18537e-07	1.26284e-06	1.99644e-08	9.61045e-08	6.23323e-07	1.89114e-06	264390	0.505532	5.04957e-07	296536	20013.6
1669	83	11	6	1.67	0.5	6.6	5	94	0.1	loamy sand	0.17	13	0.86	0.870184	2.51189e-07	0.02764	2.14133e-05	0.530925	0.853608	0.817692	-6.96547	-9.28987	1889.41	3.60088e-09	1.18537e-07	1.26284e-06	1.99644e-08	9.61045e-08	6.23323e-07	1.89114e-06	264390	0.505532	5.04957e-07	296536	20013.6
1670	83	11	6	1.67	0.5	6.6	5	94	0.1	loamy sand	0.17	13	0.86	0.870184	2.51189e-07	0.02764	2.14133e-05	0.530925	0.853608	0.817692	-6.96547	-9.28987	1889.41	3.60088e-09	1.18537e-07	1.26284e-06	1.99644e-08	9.61045e-08	6.23323e-07	1.89114e-06	264390	0.505532	5.04957e-07	296536	20013.6
1671	47	34	19	1.43	0.97	6.4	12	79	0.1	loam	0.32	23	1.6684	1.11428	3.98107e-07	0.07639	9.23319e-05	0.401294	0.795913	1.02416	-6.72934	-9.17878	1940.8	4.50937e-09	1.18953e-07	1.26301e-06	2.19067e-08	1.4603e-07	6.27798e-07	5.33415e-06	93735.7	0.459651	8.91177e-07	302597	11618.8
1672	47	34	19	1.43	0.97	6.4	12	79	0.1	loam	0.32	23	1.6684	1.11428	3.98107e-07	0.07639	9.23319e-05	0.401294	0.795913	1.02416	-6.72934	-9.17878	1940.8	4.50937e-09	1.18953e-07	1.26301e-06	2.19067e-08	1.4603e-07	6.27798e-07	5.33415e-06	93735.7	0.459651	8.91177e-07	302597	11618.8
1673	47	34	19	1.43	0.97	6.4	12	79	0.1	loam	0.32	23	1.6684	1.11428	3.98107e-07	0.07639	9.23319e-05	0.401294	0.795913	1.02416	-6.72934	-9.17878	1940.8	4.50937e-09	1.18953e-07	1.26301e-06	2.19067e-08	1.4603e-07	6.27798e-07	5.33415e-06	93735.7	0.459651	8.91177e-07	302597	11618.8
1674	47	34	19	1.43	0.97	6.4	12	79	0.1	loam	0.32	23	1.6684	1.11428	3.98107e-07	0.07639	9.23319e-05	0.401294	0.795913	1.02416	-6.72934	-9.17878	1940.8	4.50937e-09	1.18953e-07	1.26301e-06	2.19067e-08	1.4603e-07	6.27798e-07	5.33415e-06	93735.7	0.459651	8.91177e-07	302597	11618.8
1676	83	11	6	1.67	0.5	6.6	5	94	0.1	loamy sand	0.17	13	0.86	0.870184	2.51189e-07	0.02764	2.14133e-05	0.530925	0.853608	0.817692	-6.96547	-9.28987	1889.41	3.60088e-09	1.18537e-07	1.26284e-06	1.99644e-08	9.61045e-08	6.23323e-07	1.89114e-06	264390	0.505532	5.04957e-07	296536	20013.6
1677	83	11	6	1.67	0.5	6.6	5	94	0.1	loamy sand	0.17	13	0.86	0.870184	2.51189e-07	0.02764	2.14133e-05	0.530925	0.853608	0.817692	-6.96547	-9.28987	1889.41	3.60088e-09	1.18537e-07	1.26284e-06	1.99644e-08	9.61045e-08	6.23323e-07	1.89114e-06	264390	0.505532	5.04957e-07	296536	20013.6
1678	47	34	19	1.43	0.97	6.4	12	79	0.1	loam	0.32	23	1.6684	1.11428	3.98107e-07	0.07639	9.23319e-05	0.401294	0.795913	1.02416	-6.72934	-9.17878	1940.8	4.50937e-09	1.18953e-07	1.26301e-06	2.19067e-08	1.4603e-07	6.27798e-07	5.33415e-06	93735.7	0.459651	8.91177e-07	302597	11618.8
1679	47	34	19	1.43	0.97	6.4	12	79	0.1	loam	0.32	23	1.6684	1.11428	3.98107e-07	0.07639	9.23319e-05	0.401294	0.795913	1.02416	-6.72934	-9.17878	1940.8	4.50937e-09	1.18953e-07	1.26301e-06	2.19067e-08	1.4603e-07	6.27798e-07	5.33415e-06	93735.7	0.459651	8.91177e-07	302597	11618.8
1680	83	11	6	1.67	0.5	6.6	5	94	0.1	loamy sand	0.17	13	0.86	0.870184	2.51189e-07	0.02764	2.14133e-05	0.530925	0.853608	0.817692	-6.96547	-9.28987	1889.41	3.60088e-09	1.18537e-07	1.26284e-06	1.99644e-08	9.61045e-08	6.23323e-07	1.89114e-06	264390	0.505532	5.04957e-07	296536	20013.6
1681	47	34	19	1.43	0.97	6.4	12	79	0.1	loam	0.32	23	1.6684	1.11428	3.98107e-07	0.07639	9.23319e-05	0.401294	0.795913	1.02416	-6.72934	-9.17878	1940.8	4.50937e-09	1.18953e-07	1.26301e-06	2.19067e-08	1.4603e-07	6.27798e-07	5.33415e-06	93735.7	0.459651	8.91177e-07	302597	11618.8
1682	47	34	19	1.43	0.97	6.4	12	79	0.1	loam	0.32	23	1.6684	1.11428	3.98107e-07	0.07639	9.23319e-05	0.401294	0.795913	1.02416	-6.72934	-9.17878	1940.8	4.50937e-09	1.18953e-07	1.26301e-06	2.19067e-08	1.4603e-07	6.27798e-07	5.33415e-06	93735.7	0.459651	8.91177e-07	302597	11618.8
1683	83	11	6	1.67	0.5	6.6	5	94	0.1	loamy sand	0.17	13	0.86	0.870184	2.51189e-07	0.02764	2.14133e-05	0.530925	0.853608	0.817692	-6.96547	-9.28987	1889.41	3.60088e-09	1.18537e-07	1.26284e-06	1.99644e-08	9.61045e-08	6.23323e-07	1.89114e-06	264390	0.505532	5.04957e-07	296536	20013.6
1684	83	11	6	1.67	0.5	6.6	5	94	0.1	loamy sand	0.17	13	0.86	0.870184	2.51189e-07	0.02764	2.14133e-05	0.530925	0.853608	0.817692	-6.96547	-9.28987	1889.41	3.60088e-09	1.18537e-07	1.26284e-06	1.99644e-08	9.61045e-08	6.23323e-07	1.89114e-06	264390	0.505532	5.04957e-07	296536	20013.6
1685	83	11	6	1.67	0.5	6.6	5	94	0.1	loamy sand	0.17	13	0.86	0.870184	2.51189e-07	0.02764	2.14133e-05	0.530925	0.853608	0.817692	-6.96547	-9.28987	1889.41	3.60088e-09	1.18537e-07	1.26284e-06	1.99644e-08	9.61045e-08	6.23323e-07	1.89114e-06	264390	0.505532	5.04957e-07	296536	20013.6
1686	47	34	19	1.43	0.97	6.4	12	79	0.1	loam	0.32	23	1.6684	1.11428	3.98107e-07	0.07639	9.23319e-05	0.401294	0.795913	1.02416	-6.72934	-9.17878	1940.8	4.50937e-09	1.18953e-07	1.26301e-06	2.19067e-08	1.4603e-07	6.27798e-07	5.33415e-06	93735.7	0.459651	8.91177e-07	302597	11618.8
1687	83	11	6	1.67	0.5	6.6	5	94	0.1	loamy sand	0.17	13	0.86	0.870184	2.51189e-07	0.02764	2.14133e-05	0.530925	0.853608	0.817692	-6.96547	-9.28987	1889.41	3.60088e-09	1.18537e-07	1.26284e-06	1.99644e-08	9.61045e-08	6.23323e-07	1.89114e-06	264390	0.505532	5.04957e-07	296536	20013.6
1689	47	34	19	1.43	0.97	6.4	12	79	0.1	loam	0.32	23	1.6684	1.11428	3.98107e-07	0.07639	9.23319e-05	0.401294	0.795913	1.02416	-6.72934	-9.17878	1940.8	4.50937e-09	1.18953e-07	1.26301e-06	2.19067e-08	1.4603e-07	6.27798e-07	5.33415e-06	93735.7	0.459651	8.91177e-07	302597	11618.8
1690	47	34	19	1.43	0.97	6.4	12	79	0.1	loam	0.32	23	1.6684	1.11428	3.98107e-07	0.07639	9.23319e-05	0.401294	0.795913	1.02416	-6.72934	-9.17878	1940.8	4.50937e-09	1.18953e-07	1.26301e-06	2.19067e-08	1.4603e-07	6.27798e-07	5.33415e-06	93735.7	0.459651	8.91177e-07	302597	11618.8
1691	47	34	19	1.43	0.97	6.4	12	79	0.1	loam	0.32	23	1.6684	1.11428	3.98107e-07	0.07639	9.23319e-05	0.401294	0.795913	1.02416	-6.72934	-9.17878	1940.8	4.50937e-09	1.18953e-07	1.26301e-06	2.19067e-08	1.4603e-07	6.27798e-07	5.33415e-06	93735.7	0.459651	8.91177e-07	302597	11618.8
1692	47	34	19	1.43	0.97	6.4	12	79	0.1	loam	0.32	23	1.6684	1.11428	3.98107e-07	0.07639	9.23319e-05	0.401294	0.795913	1.02416	-6.72934	-9.17878	1940.8	4.50937e-09	1.18953e-07	1.26301e-06	2.19067e-08	1.4603e-07	6.27798e-07	5.33415e-06	93735.7	0.459651	8.91177e-07	302597	11618.8
1694	47	34	19	1.43	0.97	6.4	12	79	0.1	loam	0.32	23	1.6684	1.11428	3.98107e-07	0.07639	9.23319e-05	0.401294	0.795913	1.02416	-6.72934	-9.17878	1940.8	4.50937e-09	1.18953e-07	1.26301e-06	2.19067e-08	1.4603e-07	6.27798e-07	5.33415e-06	93735.7	0.459651	8.91177e-07	302597	11618.8
1695	47	34	19	1.43	0.97	6.4	12	79	0.1	loam	0.32	23	1.6684	1.11428	3.98107e-07	0.07639	9.23319e-05	0.401294	0.795913	1.02416	-6.72934	-9.17878	1940.8	4.50937e-09	1.18953e-07	1.26301e-06	2.19067e-08	1.4603e-07	6.27798e-07	5.33415e-06	93735.7	0.459651	8.91177e-07	302597	11618.8
1696	47	34	19	1.43	0.97	6.4	12	79	0.1	loam	0.32	23	1.6684	1.11428	3.98107e-07	0.07639	9.23319e-05	0.401294	0.795913	1.02416	-6.72934	-9.17878	1940.8	4.50937e-09	1.18953e-07	1.26301e-06	2.19067e-08	1.4603e-07	6.27798e-07	5.33415e-06	93735.7	0.459651	8.91177e-07	302597	11618.8
1698	47	34	19	1.43	0.97	6.4	12	79	0.1	loam	0.32	23	1.6684	1.11428	3.98107e-07	0.07639	9.23319e-05	0.401294	0.795913	1.02416	-6.72934	-9.17878	1940.8	4.50937e-09	1.18953e-07	1.26301e-06	2.19067e-08	1.4603e-07	6.27798e-07	5.33415e-06	93735.7	0.459651	8.91177e-07	302597	11618.8
1700	47	34	19	1.43	0.97	6.4	12	79	0.1	loam	0.32	23	1.6684	1.11428	3.98107e-07	0.07639	9.23319e-05	0.401294	0.795913	1.02416	-6.72934	-9.17878	1940.8	4.50937e-09	1.18953e-07	1.26301e-06	2.19067e-08	1.4603e-07	6.27798e-07	5.33415e-06	93735.7	0.459651	8.91177e-07	302597	11618.8
1701	83	11	6	1.67	0.5	6.6	5	94	0.1	loamy sand	0.17	13	0.86	0.870184	2.51189e-07	0.02764	2.14133e-05	0.530925	0.853608	0.817692	-6.96547	-9.28987	1889.41	3.60088e-09	1.18537e-07	1.26284e-06	1.99644e-08	9.61045e-08	6.23323e-07	1.89114e-06	264390	0.505532	5.04957e-07	296536	20013.6
1702	47	34	19	1.43	0.97	6.4	12	79	0.1	loam	0.32	23	1.6684	1.11428	3.98107e-07	0.07639	9.23319e-05	0.401294	0.795913	1.02416	-6.72934	-9.17878	1940.8	4.50937e-09	1.18953e-07	1.26301e-06	2.19067e-08	1.4603e-07	6.27798e-07	5.33415e-06	93735.7	0.459651	8.91177e-07	302597	11618.8
1703	47	34	19	1.43	0.97	6.4	12	79	0.1	loam	0.32	23	1.6684	1.11428	3.98107e-07	0.07639	9.23319e-05	0.401294	0.795913	1.02416	-6.72934	-9.17878	1940.8	4.50937e-09	1.18953e-07	1.26301e-06	2.19067e-08	1.4603e-07	6.27798e-07	5.33415e-06	93735.7	0.459651	8.91177e-07	302597	11618.8
1706	34	48	18	1.41	7.37	5.4	35	13	0.1	loam	0.32	23	12.6764	1.92719	3.98107e-06	0.21588	1.75905e-12	0.304049	0.742567	1.04843	-6.31918	-8.94294	754.771	2.66652e-08	1.2908e-07	1.26723e-06	6.92751e-08	1.36359e-06	6.87749e-07	1.71404e-05	29170.9	0.486071	1.47113e-06	138769	2894.62
1707	42	39	19	1.42	3.43	6.4	27	75	0.1	loam	0.32	23	5.8996	1.5147	3.98107e-07	0.19747	7.48543e-08	0.309912	0.746122	1.03677	-6.55902	-9.65675	1311.19	4.50937e-09	1.18953e-07	1.26301e-06	2.19067e-08	1.4603e-07	6.25307e-07	6.90241e-06	72438.4	0.4732	2.90021e-07	222367	2210.62
1708	31	49	20	1.39	7	6	29	14	0.1	loam	0.32	23	12.04	1.80886	1e-06	0.19573	6.7052e-15	0.310527	0.746491	1.04009	-6.4114	-9.52979	933.331	8.23128e-09	1.20654e-07	1.26372e-06	2.9864e-08	3.50564e-07	6.35795e-07	9.328e-06	53602.1	0.476827	3.93865e-07	157914	1589.68
1709	46	43	11	1.51	4.38	5.9	24	57	0.1	loam	0.32	23	7.5336	1.67721	1.25893e-06	0.16146	2.26376e-12	0.325206	0.755161	1.0798	-6.43455	-9.21639	984.446	9.83242e-09	1.21386e-07	1.26403e-06	3.32872e-08	4.38553e-07	6.40308e-07	9.71909e-06	51445.1	0.522487	6.80871e-07	174922	3201.32
1710	46	43	11	1.51	4.38	5.9	24	57	0.1	loam	0.32	23	7.5336	1.67721	1.25893e-06	0.16146	2.26376e-12	0.325206	0.755161	1.0798	-6.43455	-9.21639	984.446	9.83242e-09	1.21386e-07	1.26403e-06	3.32872e-08	4.38553e-07	6.40308e-07	9.71909e-06	51445.1	0.522487	6.80871e-07	174922	3201.32
1741	45	27	28	1.37	1.35	6.8	22	88	0.1	clay loam	0.18	23	2.322	1.15108	1.58489e-07	0.18513	0.000153858	0.314517	0.748878	0.998661	-6.75576	-9.7272	2062.54	3.02765e-09	1.18275e-07	1.26273e-06	1.87389e-08	6.46034e-08	6.25282e-07	3.04169e-06	164383	0.433444	1.56955e-07	316640	3541.04
1745	39	40	21	1.4	1.17	5.6	12	70	0.1	loam	0.32	23	2.0124	1.30971	2.51189e-06	0.05676	0.000173941	0.43735	0.813219	1.0186	-6.60108	-8.45574	1444.51	1.75803e-08	1.24927e-07	1.2655e-06	4.98519e-08	8.64331e-07	6.66839e-07	9.6486e-06	51821	0.453804	4.8727e-06	240510	27559.8
1746	41	39	20	1.41	1.21	4.5	7	30	0.1	loam	0.32	23	2.0812	1.50737	3.16228e-05	0.00721959	4.71831e-06	0.698311	0.914139	1.02256	-6.44664	-7.36553	1012.24	1.97593e-07	2.07209e-07	1.2998e-06	4.34711e-07	1.07567e-05	1.16962e-06	2.37057e-05	21092	0.45796	5.9011e-05	179133	102106
1747	42	38	20	1.41	1.06	5.5	11	65	0.1	loam	0.32	23	1.8232	1.29541	3.16228e-06	0.04722	0.000133677	0.460704	0.823864	1.02123	-6.59879	-8.31544	1436.91	2.16021e-08	1.26766e-07	1.26627e-06	5.84503e-08	1.08535e-06	6.77088e-07	1.01622e-05	49202	0.456568	6.64264e-06	239494	35737.4
1749	41	35	24	1.38	0.85	6.3	10	73	0.1	loam	0.32	23	1.462	1.08941	5.01187e-07	0.05287	1.83053e-05	0.446285	0.817341	1.00549	-6.74413	-9.04286	2008.02	5.14678e-09	1.19244e-07	1.26313e-06	2.32695e-08	1.81058e-07	6.27596e-07	5.13543e-06	97362.8	0.440312	1.31829e-06	310405	17542.6
1750	41	35	24	1.38	0.85	6.3	10	73	0.1	loam	0.32	23	1.462	1.08941	5.01187e-07	0.05287	1.83053e-05	0.446285	0.817341	1.00549	-6.74413	-9.04286	2008.02	5.14678e-09	1.19244e-07	1.26313e-06	2.32695e-08	1.81058e-07	6.27596e-07	5.13543e-06	97362.8	0.440312	1.31829e-06	310405	17542.6
1751	76	13	11	1.56	0.45	6.2	6	77	0.1	sandy loam	0.2	13	0.774	0.904781	6.30957e-07	0.03083	9.36378e-05	0.51648	0.847741	0.771626	-6.95297	-8.88646	1835.78	5.94924e-09	1.19611e-07	1.26329e-06	2.49851e-08	2.25157e-07	6.31891e-07	2.98645e-06	167423	0.454655	1.79021e-06	290126	39535.6
1752	41	35	24	1.38	0.85	6.3	10	73	0.1	loam	0.32	23	1.462	1.08941	5.01187e-07	0.05287	1.83053e-05	0.446285	0.817341	1.00549	-6.74413	-9.04286	2008.02	5.14678e-09	1.19244e-07	1.26313e-06	2.32695e-08	1.81058e-07	6.27596e-07	5.13543e-06	97362.8	0.440312	1.31829e-06	310405	17542.6
1754	76	13	11	1.56	0.45	6.2	6	77	0.1	sandy loam	0.2	13	0.774	0.904781	6.30957e-07	0.03083	9.36378e-05	0.51648	0.847741	0.771626	-6.95297	-8.88646	1835.78	5.94924e-09	1.19611e-07	1.26329e-06	2.49851e-08	2.25157e-07	6.31891e-07	2.98645e-06	167423	0.454655	1.79021e-06	290126	39535.6
1755	41	35	24	1.38	0.85	6.3	10	73	0.1	loam	0.32	23	1.462	1.08941	5.01187e-07	0.05287	1.83053e-05	0.446285	0.817341	1.00549	-6.74413	-9.04286	2008.02	5.14678e-09	1.19244e-07	1.26313e-06	2.32695e-08	1.81058e-07	6.27596e-07	5.13543e-06	97362.8	0.440312	1.31829e-06	310405	17542.6
1756	76	13	11	1.56	0.45	6.2	6	77	0.1	sandy loam	0.2	13	0.774	0.904781	6.30957e-07	0.03083	9.36378e-05	0.51648	0.847741	0.771626	-6.95297	-8.88646	1835.78	5.94924e-09	1.19611e-07	1.26329e-06	2.49851e-08	2.25157e-07	6.31891e-07	2.98645e-06	167423	0.454655	1.79021e-06	290126	39535.6
1757	41	35	24	1.38	0.85	6.3	10	73	0.1	loam	0.32	23	1.462	1.08941	5.01187e-07	0.05287	1.83053e-05	0.446285	0.817341	1.00549	-6.74413	-9.04286	2008.02	5.14678e-09	1.19244e-07	1.26313e-06	2.32695e-08	1.81058e-07	6.27596e-07	5.13543e-06	97362.8	0.440312	1.31829e-06	310405	17542.6
1758	76	13	11	1.56	0.45	6.2	6	77	0.1	sandy loam	0.2	13	0.774	0.904781	6.30957e-07	0.03083	9.36378e-05	0.51648	0.847741	0.771626	-6.95297	-8.88646	1835.78	5.94924e-09	1.19611e-07	1.26329e-06	2.49851e-08	2.25157e-07	6.31891e-07	2.98645e-06	167423	0.454655	1.79021e-06	290126	39535.6
1759	76	13	11	1.56	0.45	6.2	6	77	0.1	sandy loam	0.2	13	0.774	0.904781	6.30957e-07	0.03083	9.36378e-05	0.51648	0.847741	0.771626	-6.95297	-8.88646	1835.78	5.94924e-09	1.19611e-07	1.26329e-06	2.49851e-08	2.25157e-07	6.31891e-07	2.98645e-06	167423	0.454655	1.79021e-06	290126	39535.6
1760	41	35	24	1.38	0.85	6.3	10	73	0.1	loam	0.32	23	1.462	1.08941	5.01187e-07	0.05287	1.83053e-05	0.446285	0.817341	1.00549	-6.74413	-9.04286	2008.02	5.14678e-09	1.19244e-07	1.26313e-06	2.32695e-08	1.81058e-07	6.27596e-07	5.13543e-06	97362.8	0.440312	1.31829e-06	310405	17542.6
1761	76	13	11	1.56	0.45	6.2	6	77	0.1	sandy loam	0.2	13	0.774	0.904781	6.30957e-07	0.03083	9.36378e-05	0.51648	0.847741	0.771626	-6.95297	-8.88646	1835.78	5.94924e-09	1.19611e-07	1.26329e-06	2.49851e-08	2.25157e-07	6.31891e-07	2.98645e-06	167423	0.454655	1.79021e-06	290126	39535.6
1762	41	35	24	1.38	0.85	6.3	10	73	0.1	loam	0.32	23	1.462	1.08941	5.01187e-07	0.05287	1.83053e-05	0.446285	0.817341	1.00549	-6.74413	-9.04286	2008.02	5.14678e-09	1.19244e-07	1.26313e-06	2.32695e-08	1.81058e-07	6.27596e-07	5.13543e-06	97362.8	0.440312	1.31829e-06	310405	17542.6
1763	41	35	24	1.38	0.85	6.3	10	73	0.1	loam	0.32	23	1.462	1.08941	5.01187e-07	0.05287	1.83053e-05	0.446285	0.817341	1.00549	-6.74413	-9.04286	2008.02	5.14678e-09	1.19244e-07	1.26313e-06	2.32695e-08	1.81058e-07	6.27596e-07	5.13543e-06	97362.8	0.440312	1.31829e-06	310405	17542.6
1878	49	28	23	1.4	0.58	6.2	9	81	0.1	loam	0.32	23	0.9976	0.985238	6.30957e-07	0.05378	0.000187204	0.444128	0.816351	1.00483	-6.78034	-8.79566	2182.64	5.94924e-09	1.19611e-07	1.26329e-06	2.49851e-08	2.25157e-07	6.34417e-07	5.56044e-06	89920.9	0.439646	2.29943e-06	330078	30005.5
1879	45	30	25	1.38	2.6	5.3	20	61	0.1	loam	0.32	23	4.472	1.61387	5.01187e-06	0.10173	4.42227e-05	0.369191	0.779494	1.01362	-6.46088	-8.46841	1045.98	3.30394e-08	1.31993e-07	1.26845e-06	8.29028e-08	1.71387e-06	7.06907e-07	1.57924e-05	31660.8	0.448638	4.85649e-06	184199	12706.6
1880	42	39	19	1.42	3.43	6.4	27	75	0.1	loam	0.32	23	5.8996	1.5147	3.98107e-07	0.19747	7.48543e-08	0.309912	0.746122	1.03677	-6.55902	-9.65675	1311.19	4.50937e-09	1.18953e-07	1.26301e-06	2.19067e-08	1.4603e-07	6.25307e-07	6.90241e-06	72438.4	0.4732	2.90021e-07	222367	2210.62
1882	53	22	25	1.4	0.98	5.1	6	49	0.1	sandy clay loam	0.16	13	1.6856	1.33853	7.94328e-06	0.00980092	2.2481e-07	0.663032	0.902368	0.71843	-6.73686	-8.13038	1116.14	5.11662e-08	1.40279e-07	1.2719e-06	1.21657e-07	2.71002e-06	7.56808e-07	5.56239e-06	89889.5	0.402242	1.02864e-05	104188	38750.7
1885	41	39	20	1.41	1.45	5.1	12	37	0.1	loam	0.32	23	2.494	1.46273	7.94328e-06	0.04062	7.41018e-06	0.480209	0.832449	1.02436	-6.50282	-8.03401	1152.03	5.11662e-08	1.40279e-07	1.2719e-06	1.21657e-07	2.71002e-06	7.57002e-07	1.53608e-05	32550.4	0.45987	1.26081e-05	107242	20239.9
1886	42	36	22	1.4	1	6.6	16	93	0.1	loam	0.32	23	1.72	1.08994	2.51189e-07	0.13481	0.000188303	0.34105	0.764195	1.01357	-6.75863	-9.39913	2076.18	3.60088e-09	1.18537e-07	1.26284e-06	1.99644e-08	9.61045e-08	6.27828e-07	5.54833e-06	90117.2	0.448586	5.61577e-07	180500	4097.7
1888	52	25	23	1.41	0.95	4.7	6	39	0.1	sandy clay loam	0.16	13	1.634	1.39667	1.99526e-05	0.00613307	2.9035e-06	0.716192	0.919936	0.724312	-6.68362	-7.7136	987.363	1.25428e-07	1.74223e-07	1.28605e-06	2.80426e-07	6.791e-06	9.66178e-07	8.6651e-06	57702.8	0.407726	2.63072e-05	93088.3	57614.8
1889	52	25	23	1.41	0.95	4.7	6	39	0.1	sandy clay loam	0.16	13	1.634	1.39667	1.99526e-05	0.00613307	2.9035e-06	0.716192	0.919936	0.724312	-6.68362	-7.7136	987.363	1.25428e-07	1.74223e-07	1.28605e-06	2.80426e-07	6.791e-06	9.66178e-07	8.6651e-06	57702.8	0.407726	2.63072e-05	93088.3	57614.8
1890	41	36	23	1.39	2.72	5.2	21	24	0.1	loam	0.32	23	4.6784	1.64517	6.30957e-06	0.10286	1.93617e-06	0.368018	0.778874	1.02027	-6.43765	-8.38047	991.499	4.10639e-08	1.35661e-07	1.26998e-06	1.00059e-07	2.15485e-06	7.28382e-07	1.77825e-05	28117.5	0.455554	5.81413e-06	93448.2	6959.39
1892	53	20	27	1.39	2.34	4.8	8	20	0.1	sandy clay loam	0.16	13	4.0248	1.66546	1.58489e-05	0.01715	3.29427e-11	0.59346	0.877703	0.721409	-6.58264	-8.16438	782.516	1.00052e-07	1.62624e-07	1.28122e-06	2.26173e-07	5.39649e-06	8.94581e-07	9.12049e-06	54821.6	0.40501	9.51485e-06	74968.1	15837.8
1894	60	14	26	1.41	1.06	5	6	38	0.1	sandy clay loam	0.16	13	1.8232	1.38041	1e-05	0.0097157	1.11868e-07	0.66407	0.902721	0.716301	-6.7146	-8.06244	1060.37	6.38843e-08	1.46092e-07	1.27433e-06	1.48848e-07	3.40893e-06	7.9265e-07	6.28471e-06	79558.2	0.400275	1.20018e-05	99407.6	37993.6
1895	60	14	26	1.41	1.06	5	6	38	0.1	sandy clay loam	0.16	13	1.8232	1.38041	1e-05	0.0097157	1.11868e-07	0.66407	0.902721	0.716301	-6.7146	-8.06244	1060.37	6.38843e-08	1.46092e-07	1.27433e-06	1.48848e-07	3.40893e-06	7.9265e-07	6.28471e-06	79558.2	0.400275	1.20018e-05	99407.6	37993.6
1896	60	14	26	1.41	1.06	5	6	38	0.1	sandy clay loam	0.16	13	1.8232	1.38041	1e-05	0.0097157	1.11868e-07	0.66407	0.902721	0.716301	-6.7146	-8.06244	1060.37	6.38843e-08	1.46092e-07	1.27433e-06	1.48848e-07	3.40893e-06	7.9265e-07	6.28471e-06	79558.2	0.400275	1.20018e-05	99407.6	37993.6
1897	60	14	26	1.41	1.06	5	6	38	0.1	sandy clay loam	0.16	13	1.8232	1.38041	1e-05	0.0097157	1.11868e-07	0.66407	0.902721	0.716301	-6.7146	-8.06244	1060.37	6.38843e-08	1.46092e-07	1.27433e-06	1.48848e-07	3.40893e-06	7.9265e-07	6.28471e-06	79558.2	0.400275	1.20018e-05	99407.6	37993.6
1898	60	14	26	1.41	1.06	5	6	38	0.1	sandy clay loam	0.16	13	1.8232	1.38041	1e-05	0.0097157	1.11868e-07	0.66407	0.902721	0.716301	-6.7146	-8.06244	1060.37	6.38843e-08	1.46092e-07	1.27433e-06	1.48848e-07	3.40893e-06	7.9265e-07	6.28471e-06	79558.2	0.400275	1.20018e-05	99407.6	37993.6
1899	60	14	26	1.41	1.06	5	6	38	0.1	sandy clay loam	0.16	13	1.8232	1.38041	1e-05	0.0097157	1.11868e-07	0.66407	0.902721	0.716301	-6.7146	-8.06244	1060.37	6.38843e-08	1.46092e-07	1.27433e-06	1.48848e-07	3.40893e-06	7.9265e-07	6.28471e-06	79558.2	0.400275	1.20018e-05	99407.6	37993.6
1900	57	15	28	1.39	0.98	4.7	5	44	0.1	sandy clay loam	0.16	13	1.6856	1.40653	1.99526e-05	0.0033835	8.95818e-08	0.775353	0.938372	0.710014	-6.68819	-7.7372	997.814	1.25428e-07	1.74223e-07	1.28605e-06	2.80426e-07	6.791e-06	9.66103e-07	8.00383e-06	62470.1	0.394522	2.61203e-05	93997.3	60511.2
1901	22	19	59	1.21	1.42	5.4	10	61	0.1	clay(heavy)	0.2	24	2.4424	1.40511	3.98107e-06	0.03369	5.30651e-09	0.504765	0.842893	0.965107	-6.58136	-8.37392	1440.4	2.66652e-08	1.2908e-07	1.26723e-06	6.92751e-08	1.36359e-06	6.87749e-07	6.45289e-06	77484.6	0.3845	4.81176e-06	131190	18806.8
1902	22	19	59	1.21	1.42	5.4	10	61	0.1	clay(heavy)	0.2	24	2.4424	1.40511	3.98107e-06	0.03369	5.30651e-09	0.504765	0.842893	0.965107	-6.58136	-8.37392	1440.4	2.66652e-08	1.2908e-07	1.26723e-06	6.92751e-08	1.36359e-06	6.87749e-07	6.45289e-06	77484.6	0.3845	4.81176e-06	131190	18806.8
1903	22	19	59	1.21	1.42	5.4	10	61	0.1	clay(heavy)	0.2	24	2.4424	1.40511	3.98107e-06	0.03369	5.30651e-09	0.504765	0.842893	0.965107	-6.58136	-8.37392	1440.4	2.66652e-08	1.2908e-07	1.26723e-06	6.92751e-08	1.36359e-06	6.87749e-07	6.45289e-06	77484.6	0.3845	4.81176e-06	131190	18806.8
1904	22	19	59	1.21	1.42	5.4	10	61	0.1	clay(heavy)	0.2	24	2.4424	1.40511	3.98107e-06	0.03369	5.30651e-09	0.504765	0.842893	0.965107	-6.58136	-8.37392	1440.4	2.66652e-08	1.2908e-07	1.26723e-06	6.92751e-08	1.36359e-06	6.87749e-07	6.45289e-06	77484.6	0.3845	4.81176e-06	131190	18806.8
1905	64	12	24	1.43	0.73	4.6	5	44	0.1	sandy clay loam	0.16	13	1.2556	1.33016	2.51189e-05	0.00295642	8.78748e-06	0.787414	0.942	0.71852	-6.70761	-7.51648	1043.43	1.57375e-07	1.88826e-07	1.29214e-06	3.48727e-07	8.5466e-06	1.05638e-06	9.07971e-06	55067.8	0.402325	4.1388e-05	97948.2	89814.3
1906	40	39	21	1.4	1.25	5.1	11	47	0.1	loam	0.32	23	2.15	1.41568	7.94328e-06	0.03492	2.48837e-05	0.500038	0.840913	1.01926	-6.52501	-7.98077	1212.42	5.11662e-08	1.40279e-07	1.2719e-06	1.21657e-07	2.71002e-06	7.57474e-07	1.47532e-05	33891	0.454495	1.45238e-05	112344	25132.9
1907	33	45	22	1.38	3.71	5.5	18	34	0.1	loam	0.32	23	6.3812	1.69258	3.16228e-06	0.09054	4.62285e-12	0.381878	0.786106	1.02667	-6.43411	-8.79526	983.433	2.16021e-08	1.26766e-07	1.26627e-06	5.84503e-08	1.08535e-06	6.73479e-07	1.22489e-05	40819.9	0.462318	2.22038e-06	92746	3886.3
1912	73	18	9	1.59	1.4	7.5	12	75	0.1	sandy loam	0.2	13	2.408	1.04361	3.16228e-08	0.11474	6.78084e-11	0.356698	0.772814	0.797865	-6.96556	-10.6039	1889.82	2.24315e-09	1.17917e-07	1.26258e-06	1.70616e-08	2.1492e-08	6.18918e-07	2.31786e-06	215716	0.482972	3.16921e-08	166516	549.809
1919	30	41	29	1.33	3	4.5	18	93	0.1	clay loam	0.18	23	5.16	1.79523	3.16228e-05	0.09297	0.000920172	0.378946	0.784593	1.00403	-6.34076	-7.73149	793.229	1.97593e-07	2.07209e-07	1.2998e-06	4.34711e-07	1.07567e-05	1.19433e-06	2.46581e-05	20277.3	0.438837	1.58119e-05	75930.2	10683.5
1920	30	41	29	1.33	3	4.5	18	93	0.1	clay loam	0.18	23	5.16	1.79523	3.16228e-05	0.09297	0.000920172	0.378946	0.784593	1.00403	-6.34076	-7.73149	793.229	1.97593e-07	2.07209e-07	1.2998e-06	4.34711e-07	1.07567e-05	1.19433e-06	2.46581e-05	20277.3	0.438837	1.58119e-05	75930.2	10683.5
1922	47	29	24	1.39	0.86	6.4	12	89	0.1	loam	0.32	23	1.4792	1.07612	3.98107e-07	0.08436	0.000181828	0.389831	0.790167	1.0056	-6.75598	-9.14729	2063.58	4.50937e-09	1.18953e-07	1.26301e-06	2.19067e-08	1.4603e-07	6.30213e-07	5.49451e-06	90999.9	0.44043	1.0288e-06	179566	7404.16
1923	47	29	24	1.39	0.86	6.4	12	89	0.1	loam	0.32	23	1.4792	1.07612	3.98107e-07	0.08436	0.000181828	0.389831	0.790167	1.0056	-6.75598	-9.14729	2063.58	4.50937e-09	1.18953e-07	1.26301e-06	2.19067e-08	1.4603e-07	6.30213e-07	5.49451e-06	90999.9	0.44043	1.0288e-06	179566	7404.16
1924	56	20	24	1.41	0.74	6.3	7	85	0.1	sandy clay loam	0.16	13	1.2728	1.04547	5.01187e-07	0.03195	3.25636e-06	0.511765	0.8458	0.718656	-6.93409	-9.22163	1757.68	5.14678e-09	1.19244e-07	1.26313e-06	2.32695e-08	1.81058e-07	6.2719e-07	2.23894e-06	223320	0.402451	8.27383e-07	156371	11627.9
1926	49	28	23	1.4	0.58	6.2	9	81	0.1	loam	0.32	23	0.9976	0.985238	6.30957e-07	0.05378	0.000187204	0.444128	0.816351	1.00483	-6.78034	-8.79566	2182.64	5.94924e-09	1.19611e-07	1.26329e-06	2.49851e-08	2.25157e-07	6.34417e-07	5.56044e-06	89920.9	0.439646	2.29943e-06	188322	17119.3
1927	17	27	56	1.21	1.74	6	15	72	0.1	clay (light)	0.2	24	2.9928	1.36754	1e-06	0.07503	1.65002e-07	0.403404	0.796957	0.971013	-6.63221	-9.04769	1619.32	8.23128e-09	1.20654e-07	1.26372e-06	2.9864e-08	3.50564e-07	6.358e-07	4.48774e-06	111415	0.389764	1.00607e-06	145535	6358.3
1928	17	27	56	1.21	1.74	6	15	72	0.1	clay (light)	0.2	24	2.9928	1.36754	1e-06	0.07503	1.65002e-07	0.403404	0.796957	0.971013	-6.63221	-9.04769	1619.32	8.23128e-09	1.20654e-07	1.26372e-06	2.9864e-08	3.50564e-07	6.358e-07	4.48774e-06	111415	0.389764	1.00607e-06	145535	6358.3
1929	17	27	56	1.21	1.74	6	15	72	0.1	clay (light)	0.2	24	2.9928	1.36754	1e-06	0.07503	1.65002e-07	0.403404	0.796957	0.971013	-6.63221	-9.04769	1619.32	8.23128e-09	1.20654e-07	1.26372e-06	2.9864e-08	3.50564e-07	6.358e-07	4.48774e-06	111415	0.389764	1.00607e-06	145535	6358.3
1931	17	27	56	1.21	1.74	6	15	72	0.1	clay (light)	0.2	24	2.9928	1.36754	1e-06	0.07503	1.65002e-07	0.403404	0.796957	0.971013	-6.63221	-9.04769	1619.32	8.23128e-09	1.20654e-07	1.26372e-06	2.9864e-08	3.50564e-07	6.358e-07	4.48774e-06	111415	0.389764	1.00607e-06	145535	6358.3
1932	49	28	23	1.4	0.58	6.2	9	81	0.1	loam	0.32	23	0.9976	0.985238	6.30957e-07	0.05378	0.000187204	0.444128	0.816351	1.00483	-6.78034	-8.79566	2182.64	5.94924e-09	1.19611e-07	1.26329e-06	2.49851e-08	2.25157e-07	6.34417e-07	5.56044e-06	89920.9	0.439646	2.29943e-06	188322	17119.3
1933	26	33	41	1.27	30.73	4.4	77	58	0.1	clay (light)	0.2	16	52.8556	2.54986	3.98107e-05	0.43119	2.13795e-11	0.283892	0.729942	0.819991	-6.13796	-8.67986	345.929	2.48224e-07	2.30352e-07	1.30945e-06	5.42959e-07	1.35391e-05	1.31219e-06	4.24045e-05	11791.2	0.412925	3.16566e-06	34329.4	529.126
1934	89	6	5	1.7	0.4	6.4	3	100	0.1	sand	0.1	13	0.688	0.83344	3.98107e-07	0.0081224	4.87455e-06	0.684976	0.909743	0.829003	-6.96058	-8.99446	1868.24	4.50937e-09	1.18953e-07	1.26301e-06	2.19067e-08	1.4603e-07	6.25437e-07	9.75955e-07	512319	0.518872	5.61272e-07	164872	24599.2
1935	89	6	5	1.7	0.4	6.4	3	100	0.1	sand	0.1	13	0.688	0.83344	3.98107e-07	0.0081224	4.87455e-06	0.684976	0.909743	0.829003	-6.96058	-8.99446	1868.24	4.50937e-09	1.18953e-07	1.26301e-06	2.19067e-08	1.4603e-07	6.25437e-07	9.75955e-07	512319	0.518872	5.61272e-07	164872	24599.2
1936	89	6	5	1.7	0.4	6.4	3	100	0.1	sand	0.1	13	0.688	0.83344	3.98107e-07	0.0081224	4.87455e-06	0.684976	0.909743	0.829003	-6.96058	-8.99446	1868.24	4.50937e-09	1.18953e-07	1.26301e-06	2.19067e-08	1.4603e-07	6.25437e-07	9.75955e-07	512319	0.518872	5.61272e-07	164872	24599.2
1941	82	10	8	1.62	0.7	5.4	4	38	0.1	loamy sand	0.17	13	1.204	1.18086	3.98107e-06	0.00423306	7.38789e-08	0.754212	0.931909	0.799689	-6.77176	-8.23451	1209.51	2.66652e-08	1.2908e-07	1.26723e-06	6.92751e-08	1.36359e-06	6.87751e-07	3.67087e-06	136208	0.485004	6.16343e-06	112100	45643
1942	42	37	21	1.4	1.37	5.1	11	22	0.1	loam	0.32	23	2.3564	1.44474	7.94328e-06	0.03455	2.07637e-06	0.501442	0.841502	1.02017	-6.51265	-8.01546	1178.39	5.11662e-08	1.40279e-07	1.2719e-06	1.21657e-07	2.71002e-06	7.56858e-07	1.47099e-05	33990.7	0.455454	1.33806e-05	109476	22677.6
1943	83	11	6	1.67	0.5	6.6	5	94	0.1	loamy sand	0.17	13	0.86	0.870184	2.51189e-07	0.02764	2.14133e-05	0.530925	0.853608	0.817692	-6.96547	-9.28987	1889.41	3.60088e-09	1.18537e-07	1.26284e-06	1.99644e-08	9.61045e-08	6.23323e-07	1.89114e-06	264390	0.505532	5.04957e-07	166485	11236.3
1944	76	12	12	1.55	3.43	6	13	33	0.1	sandy loam	0.2	13	5.8996	1.5827	1e-06	0.08056	2.53372e-14	0.395113	0.792831	0.785452	-6.6561	-9.46032	926.728	8.23128e-09	1.20654e-07	1.26372e-06	2.9864e-08	3.50564e-07	6.35795e-07	4.5819e-06	109125	0.469362	4.65604e-07	87784.8	2093.48
1954	56	20	24	1.41	0.74	6.3	7	85	0.1	sandy clay loam	0.16	13	1.2728	1.04547	5.01187e-07	0.03195	3.25636e-06	0.511765	0.8458	0.718656	-6.93409	-9.22163	1757.68	5.14678e-09	1.19244e-07	1.26313e-06	2.32695e-08	1.81058e-07	6.2719e-07	2.23894e-06	223320	0.402451	8.27383e-07	280629	20867.9
1955	79	11	10	1.59	0.53	6.3	4	76	0.1	sandy loam	0.2	13	0.9116	0.939657	5.01187e-07	0.01286	7.86541e-09	0.629954	0.890896	0.780338	-6.94008	-9.04265	1782.13	5.14678e-09	1.19244e-07	1.26313e-06	2.32695e-08	1.81058e-07	6.27102e-07	2.27355e-06	219921	0.463869	1.20152e-06	283623	34764.2
1958	90	5	5	1.71	0.35	5.7	2	80	0.1	sand	0.1	13	0.602	0.910105	0.01119	0.000101203	1.99526e-06	0.954255	0.988362	0.82767	-6.88457	-8.24393	1568.3	6.91973e-05	3.17462e-05	1.44474e-05	0.000147954	0.00380257	0.000195637	0.000820278	609.549	0.517281	3.15132e-06	256771	255.137
1959	83	11	6	1.67	0.5	6.6	5	94	0.1	loamy sand	0.17	13	0.86	0.870184	2.51189e-07	0.02764	2.14133e-05	0.530925	0.853608	0.817692	-6.96547	-9.28987	1889.41	3.60088e-09	1.18537e-07	1.26284e-06	1.99644e-08	9.61045e-08	6.23323e-07	1.89114e-06	264390	0.505532	5.04957e-07	296536	20013.6
1961	80	11	9	1.6	0.5	5.8	5	84	0.1	loamy sand	0.17	13	0.86	1.00618	1.58489e-06	0.01857	0.000174719	0.58317	0.873874	0.787581	-6.8761	-8.51426	1537.98	1.1848e-08	1.22307e-07	1.26441e-06	3.75965e-08	5.4932e-07	6.50705e-07	3.1596e-06	158248	0.471669	3.36955e-06	252839	63590.3
1966	82	12	6	1.67	0.68	5.4	6	75	0.1	loamy sand	0.17	13	1.1696	1.17167	3.98107e-06	0.02217	0.000331794	0.560018	0.865069	0.820764	-6.76285	-8.20624	1184.95	2.66652e-08	1.2908e-07	1.26723e-06	6.92751e-08	1.36359e-06	6.96705e-07	4.95446e-06	100919	0.50912	6.07884e-06	110030	34365.7
1968	56	20	24	1.41	0.74	6.3	7	85	0.1	sandy clay loam	0.16	13	1.2728	1.04547	5.01187e-07	0.03195	3.25636e-06	0.511765	0.8458	0.718656	-6.93409	-9.22163	1757.68	5.14678e-09	1.19244e-07	1.26313e-06	2.32695e-08	1.81058e-07	6.2719e-07	2.23894e-06	223320	0.402451	8.27383e-07	156371	11627.9
3001	49	27	24	1.4	1	4.6	7	44	0.1	sandy clay loam	0.16	13	1.72	1.42994	2.51189e-05	0.0091147	2.11533e-05	0.671608	0.905272	0.721664	-6.66517	-7.63557	946.295	1.57375e-07	1.88826e-07	1.29214e-06	3.48727e-07	8.5466e-06	1.05671e-06	1.06459e-05	46966.4	0.405248	3.19038e-05	159819	97046.1
3003	49	27	24	1.4	1	4.6	7	44	0.1	sandy clay loam	0.16	13	1.72	1.42994	2.51189e-05	0.0091147	2.11533e-05	0.671608	0.905272	0.721664	-6.66517	-7.63557	946.295	1.57375e-07	1.88826e-07	1.29214e-06	3.48727e-07	8.5466e-06	1.05671e-06	1.06459e-05	46966.4	0.405248	3.19038e-05	159819	97046.1
3004	49	27	24	1.4	1	4.6	7	44	0.1	sandy clay loam	0.16	13	1.72	1.42994	2.51189e-05	0.0091147	2.11533e-05	0.671608	0.905272	0.721664	-6.66517	-7.63557	946.295	1.57375e-07	1.88826e-07	1.29214e-06	3.48727e-07	8.5466e-06	1.05671e-06	1.06459e-05	46966.4	0.405248	3.19038e-05	159819	97046.1
3013	42	36	22	1.4	1	6.6	16	93	0.1	loam	0.32	23	1.72	1.08994	2.51189e-07	0.13481	0.000188303	0.34105	0.764195	1.01357	-6.75863	-9.39913	2076.18	3.60088e-09	1.18537e-07	1.26284e-06	1.99644e-08	9.61045e-08	6.27828e-07	5.54833e-06	90117.2	0.448586	5.61577e-07	303096	6880.86
3016	42	36	22	1.4	1	6.6	16	93	0.1	loam	0.32	23	1.72	1.08994	2.51189e-07	0.13481	0.000188303	0.34105	0.764195	1.01357	-6.75863	-9.39913	2076.18	3.60088e-09	1.18537e-07	1.26284e-06	1.99644e-08	9.61045e-08	6.27828e-07	5.54833e-06	90117.2	0.448586	5.61577e-07	303096	6880.86
3020	42	36	22	1.4	1	6.6	16	93	0.1	loam	0.32	23	1.72	1.08994	2.51189e-07	0.13481	0.000188303	0.34105	0.764195	1.01357	-6.75863	-9.39913	2076.18	3.60088e-09	1.18537e-07	1.26284e-06	1.99644e-08	9.61045e-08	6.27828e-07	5.54833e-06	90117.2	0.448586	5.61577e-07	409606	9298.84
3063	17	31	52	1.22	1.25	5.8	26	78	0.1	clay (light)	0.2	24	2.15	1.29668	1.58489e-06	0.20066	0.00110869	0.308815	0.74546	0.973213	-6.64665	-8.71807	1674.06	1.1848e-08	1.22307e-07	1.26441e-06	3.75965e-08	5.4932e-07	6.75915e-07	7.06419e-06	70779.6	0.391743	2.12069e-06	353300	20774.4
3064	17	31	52	1.22	1.25	5.8	26	78	0.1	clay (light)	0.2	24	2.15	1.29668	1.58489e-06	0.20066	0.00110869	0.308815	0.74546	0.973213	-6.64665	-8.71807	1674.06	1.1848e-08	1.22307e-07	1.26441e-06	3.75965e-08	5.4932e-07	6.75915e-07	7.06419e-06	70779.6	0.391743	2.12069e-06	353300	20774.4
3066	17	31	52	1.22	1.25	5.8	26	78	0.1	clay (light)	0.2	24	2.15	1.29668	1.58489e-06	0.20066	0.00110869	0.308815	0.74546	0.973213	-6.64665	-8.71807	1674.06	1.1848e-08	1.22307e-07	1.26441e-06	3.75965e-08	5.4932e-07	6.75915e-07	7.06419e-06	70779.6	0.391743	2.12069e-06	353300	20774.4
3070	15	30	55	1.21	2.19	6.3	32	87	0.1	clay (light)	0.2	24	3.7668	1.38946	5.01187e-07	0.23636	0.000571605	0.298717	0.73929	0.974649	-6.64068	-9.43365	1651.22	5.14678e-09	1.19244e-07	1.26313e-06	2.32695e-08	1.81058e-07	6.42531e-07	4.81407e-06	103862	0.393041	4.10235e-07	152522	2554.23
3118	73	18	9	1.59	1.4	7.5	12	75	0.1	sandy loam	0.2	13	2.408	1.04361	3.16228e-08	0.11474	6.78084e-11	0.356698	0.772814	0.797865	-6.96556	-10.6039	1889.82	2.24315e-09	1.17917e-07	1.26258e-06	1.70616e-08	2.1492e-08	6.18918e-07	2.31786e-06	215716	0.482972	3.16921e-08	234992	775.905
3185	47	29	24	1.39	0.86	6.4	12	89	0.1	loam	0.32	23	1.4792	1.07612	3.98107e-07	0.08436	0.000181828	0.389831	0.790167	1.0056	-6.75598	-9.14729	2063.58	4.50937e-09	1.18953e-07	1.26301e-06	2.19067e-08	1.4603e-07	6.30213e-07	5.49451e-06	90999.9	0.44043	1.0288e-06	301712	12440.7
3188	47	29	24	1.39	0.86	6.4	12	89	0.1	loam	0.32	23	1.4792	1.07612	3.98107e-07	0.08436	0.000181828	0.389831	0.790167	1.0056	-6.75598	-9.14729	2063.58	4.50937e-09	1.18953e-07	1.26301e-06	2.19067e-08	1.4603e-07	6.30213e-07	5.49451e-06	90999.9	0.44043	1.0288e-06	301712	12440.7
3191	26	27	47	1.25	1.22	6.3	18	77	0.1	clay (light)	0.2	24	2.0984	1.20398	5.01187e-07	0.11486	0.000189376	0.356593	0.772757	0.980478	-6.71257	-9.20279	1948.47	5.14678e-09	1.19244e-07	1.26313e-06	2.32695e-08	1.81058e-07	6.32214e-07	4.02187e-06	124320	0.398352	6.66708e-07	303494	10020.6
3192	26	27	47	1.25	1.22	6.3	18	77	0.1	clay (light)	0.2	24	2.0984	1.20398	5.01187e-07	0.11486	0.000189376	0.356593	0.772757	0.980478	-6.71257	-9.20279	1948.47	5.14678e-09	1.19244e-07	1.26313e-06	2.32695e-08	1.81058e-07	6.32214e-07	4.02187e-06	124320	0.398352	6.66708e-07	303494	10020.6
3193	26	27	47	1.25	1.22	6.3	18	77	0.1	clay (light)	0.2	24	2.0984	1.20398	5.01187e-07	0.11486	0.000189376	0.356593	0.772757	0.980478	-6.71257	-9.20279	1948.47	5.14678e-09	1.19244e-07	1.26313e-06	2.32695e-08	1.81058e-07	6.32214e-07	4.02187e-06	124320	0.398352	6.66708e-07	288878	9538.04
3200	30	24	46	1.26	1.39	6.3	22	83	0.1	clay (light)	0.2	24	2.3908	1.24534	5.01187e-07	0.1605	0.000389607	0.325699	0.755447	0.983378	-6.69402	-9.25087	1867	5.14678e-09	1.19244e-07	1.26313e-06	2.32695e-08	1.81058e-07	6.37618e-07	4.40961e-06	113389	0.401021	5.88167e-07	279575	7477.14
3206	47	32	21	1.41	0.82	6.2	11	88	0.1	loam	0.32	23	1.4104	1.09502	6.30957e-07	0.07371	0.000260118	0.405498	0.797989	1.01505	-6.72959	-8.92123	1941.93	5.94924e-09	1.19611e-07	1.26329e-06	2.49851e-08	2.25157e-07	6.36385e-07	6.0933e-06	82057.3	0.450109	1.67011e-06	288138	17773.8
3208	47	32	21	1.41	0.82	6.2	11	88	0.1	loam	0.32	23	1.4104	1.09502	6.30957e-07	0.07371	0.000260118	0.405498	0.797989	1.01505	-6.72959	-8.92123	1941.93	5.94924e-09	1.19611e-07	1.26329e-06	2.49851e-08	2.25157e-07	6.36385e-07	6.0933e-06	82057.3	0.450109	1.67011e-06	288138	17773.8
3215	26	33	41	1.27	30.73	4.4	77	58	0.1	clay (light)	0.2	16	52.8556	2.54986	3.98107e-05	0.43119	2.13795e-11	0.283892	0.729942	0.819991	-6.13796	-8.67986	345.929	2.48224e-07	2.30352e-07	1.30945e-06	5.42959e-07	1.35391e-05	1.31219e-06	4.24045e-05	11791.2	0.412925	3.16566e-06	35478.1	546.832
3221	26	33	41	1.27	30.73	4.4	77	58	0.1	clay (light)	0.2	16	52.8556	2.54986	3.98107e-05	0.43119	2.13795e-11	0.283892	0.729942	0.819991	-6.13796	-8.67986	345.929	2.48224e-07	2.30352e-07	1.30945e-06	5.42959e-07	1.35391e-05	1.31219e-06	4.24045e-05	11791.2	0.412925	3.16566e-06	51091.8	787.488
3261	83	11	6	1.67	0.5	6.6	5	94	0.1	loamy sand	0.17	13	0.86	0.870184	2.51189e-07	0.02764	2.14133e-05	0.530925	0.853608	0.817692	-6.96547	-9.28987	1889.41	3.60088e-09	1.18537e-07	1.26284e-06	1.99644e-08	9.61045e-08	6.23323e-07	1.89114e-06	264390	0.505532	5.04957e-07	282152	19042.9
3330	22	31	47	1.25	1.72	5	17	28	0.1	clay (light)	0.2	24	2.9584	1.53387	1e-05	0.06564	7.19697e-06	0.41941	0.804748	0.983909	-6.49166	-8.03278	1171.62	6.38843e-08	1.46092e-07	1.27433e-06	1.48848e-07	3.40893e-06	7.92841e-07	1.24391e-05	40196	0.401511	9.78416e-06	112313	17735.1
3331	41	39	20	1.41	1.45	5.1	12	37	0.1	loam	0.32	23	2.494	1.46273	7.94328e-06	0.04062	7.41018e-06	0.480209	0.832449	1.02436	-6.50282	-8.03401	1152.03	5.11662e-08	1.40279e-07	1.2719e-06	1.21657e-07	2.71002e-06	7.57002e-07	1.53608e-05	32550.4	0.45987	1.26081e-05	110606	20874.7
3332	41	39	20	1.41	1.45	5.1	12	37	0.1	loam	0.32	23	2.494	1.46273	7.94328e-06	0.04062	7.41018e-06	0.480209	0.832449	1.02436	-6.50282	-8.03401	1152.03	5.11662e-08	1.40279e-07	1.2719e-06	1.21657e-07	2.71002e-06	7.57002e-07	1.53608e-05	32550.4	0.45987	1.26081e-05	110606	20874.7
3333	75	15	10	1.58	0.7	5.2	5	22	0.1	sandy loam	0.2	13	1.204	1.21486	6.30957e-06	0.00666149	3.77644e-07	0.707217	0.91704	0.783117	-6.75484	-8.04793	1163.31	4.10639e-08	1.35661e-07	1.26998e-06	1.00059e-07	2.15485e-06	7.2834e-07	5.78343e-06	86453.8	0.466846	1.18689e-05	111589	53455.1
3334	41	39	20	1.41	1.45	5.1	12	37	0.1	loam	0.32	23	2.494	1.46273	7.94328e-06	0.04062	7.41018e-06	0.480209	0.832449	1.02436	-6.50282	-8.03401	1152.03	5.11662e-08	1.40279e-07	1.2719e-06	1.21657e-07	2.71002e-06	7.57002e-07	1.53608e-05	32550.4	0.45987	1.26081e-05	110606	20874.7
3337	42	36	22	1.4	1	6.6	16	93	0.1	loam	0.32	23	1.72	1.08994	2.51189e-07	0.13481	0.000188303	0.34105	0.764195	1.01357	-6.75863	-9.39913	2076.18	3.60088e-09	1.18537e-07	1.26284e-06	1.99644e-08	9.61045e-08	6.27828e-07	5.54833e-06	90117.2	0.448586	5.61577e-07	185782	4217.6
3338	42	36	22	1.4	1	6.6	16	93	0.1	loam	0.32	23	1.72	1.08994	2.51189e-07	0.13481	0.000188303	0.34105	0.764195	1.01357	-6.75863	-9.39913	2076.18	3.60088e-09	1.18537e-07	1.26284e-06	1.99644e-08	9.61045e-08	6.27828e-07	5.54833e-06	90117.2	0.448586	5.61577e-07	185782	4217.6
3340	42	36	22	1.4	1	6.6	16	93	0.1	loam	0.32	23	1.72	1.08994	2.51189e-07	0.13481	0.000188303	0.34105	0.764195	1.01357	-6.75863	-9.39913	2076.18	3.60088e-09	1.18537e-07	1.26284e-06	1.99644e-08	9.61045e-08	6.27828e-07	5.54833e-06	90117.2	0.448586	5.61577e-07	185782	4217.6
3341	42	36	22	1.4	1	6.6	16	93	0.1	loam	0.32	23	1.72	1.08994	2.51189e-07	0.13481	0.000188303	0.34105	0.764195	1.01357	-6.75863	-9.39913	2076.18	3.60088e-09	1.18537e-07	1.26284e-06	1.99644e-08	9.61045e-08	6.27828e-07	5.54833e-06	90117.2	0.448586	5.61577e-07	185782	4217.6
3342	42	36	22	1.4	1	6.6	16	93	0.1	loam	0.32	23	1.72	1.08994	2.51189e-07	0.13481	0.000188303	0.34105	0.764195	1.01357	-6.75863	-9.39913	2076.18	3.60088e-09	1.18537e-07	1.26284e-06	1.99644e-08	9.61045e-08	6.27828e-07	5.54833e-06	90117.2	0.448586	5.61577e-07	185782	4217.6
3349	42	36	22	1.4	1	6.6	16	93	0.1	loam	0.32	23	1.72	1.08994	2.51189e-07	0.13481	0.000188303	0.34105	0.764195	1.01357	-6.75863	-9.39913	2076.18	3.60088e-09	1.18537e-07	1.26284e-06	1.99644e-08	9.61045e-08	6.27828e-07	5.54833e-06	90117.2	0.448586	5.61577e-07	185782	4217.6
3351	42	36	22	1.4	1	6.6	16	93	0.1	loam	0.32	23	1.72	1.08994	2.51189e-07	0.13481	0.000188303	0.34105	0.764195	1.01357	-6.75863	-9.39913	2076.18	3.60088e-09	1.18537e-07	1.26284e-06	1.99644e-08	9.61045e-08	6.27828e-07	5.54833e-06	90117.2	0.448586	5.61577e-07	185782	4217.6
3352	42	36	22	1.4	1	6.6	16	93	0.1	loam	0.32	23	1.72	1.08994	2.51189e-07	0.13481	0.000188303	0.34105	0.764195	1.01357	-6.75863	-9.39913	2076.18	3.60088e-09	1.18537e-07	1.26284e-06	1.99644e-08	9.61045e-08	6.27828e-07	5.54833e-06	90117.2	0.448586	5.61577e-07	185782	4217.6
3353	42	36	22	1.4	1	6.6	16	93	0.1	loam	0.32	23	1.72	1.08994	2.51189e-07	0.13481	0.000188303	0.34105	0.764195	1.01357	-6.75863	-9.39913	2076.18	3.60088e-09	1.18537e-07	1.26284e-06	1.99644e-08	9.61045e-08	6.27828e-07	5.54833e-06	90117.2	0.448586	5.61577e-07	185782	4217.6
3354	74	16	10	1.58	0.7	5.4	7	88	0.1	sandy loam	0.2	13	1.204	1.18086	3.98107e-06	0.03744	0.000619026	0.490877	0.837034	0.783117	-6.7817	-8.24793	1237.53	2.66652e-08	1.2908e-07	1.26723e-06	6.92751e-08	1.36359e-06	7.04458e-07	6.66205e-06	75052	0.466846	7.48876e-06	118017	30966.5
3355	74	16	10	1.58	0.7	5.4	7	88	0.1	sandy loam	0.2	13	1.204	1.18086	3.98107e-06	0.03744	0.000619026	0.490877	0.837034	0.783117	-6.7817	-8.24793	1237.53	2.66652e-08	1.2908e-07	1.26723e-06	6.92751e-08	1.36359e-06	7.04458e-07	6.66205e-06	75052	0.466846	7.48876e-06	118017	30966.5
3360	40	39	21	1.4	1.25	5.1	11	47	0.1	loam	0.32	23	2.15	1.41568	7.94328e-06	0.03492	2.48837e-05	0.500038	0.840913	1.01926	-6.52501	-7.98077	1212.42	5.11662e-08	1.40279e-07	1.2719e-06	1.21657e-07	2.71002e-06	7.57474e-07	1.47532e-05	33891	0.454495	1.45238e-05	115851	25917.5
3361	40	39	21	1.4	1.25	5.1	11	47	0.1	loam	0.32	23	2.15	1.41568	7.94328e-06	0.03492	2.48837e-05	0.500038	0.840913	1.01926	-6.52501	-7.98077	1212.42	5.11662e-08	1.40279e-07	1.2719e-06	1.21657e-07	2.71002e-06	7.57474e-07	1.47532e-05	33891	0.454495	1.45238e-05	115851	25917.5
3362	40	39	21	1.4	1.25	5.1	11	47	0.1	loam	0.32	23	2.15	1.41568	7.94328e-06	0.03492	2.48837e-05	0.500038	0.840913	1.01926	-6.52501	-7.98077	1212.42	5.11662e-08	1.40279e-07	1.2719e-06	1.21657e-07	2.71002e-06	7.57474e-07	1.47532e-05	33891	0.454495	1.45238e-05	115851	25917.5
3363	40	39	21	1.4	1.25	5.1	11	47	0.1	loam	0.32	23	2.15	1.41568	7.94328e-06	0.03492	2.48837e-05	0.500038	0.840913	1.01926	-6.52501	-7.98077	1212.42	5.11662e-08	1.40279e-07	1.2719e-06	1.21657e-07	2.71002e-06	7.57474e-07	1.47532e-05	33891	0.454495	1.45238e-05	115851	25917.5
3364	40	39	21	1.4	1.25	5.1	11	47	0.1	loam	0.32	23	2.15	1.41568	7.94328e-06	0.03492	2.48837e-05	0.500038	0.840913	1.01926	-6.52501	-7.98077	1212.42	5.11662e-08	1.40279e-07	1.2719e-06	1.21657e-07	2.71002e-06	7.57474e-07	1.47532e-05	33891	0.454495	1.45238e-05	115851	25917.5
3366	40	39	21	1.4	1.25	5.1	11	47	0.1	loam	0.32	23	2.15	1.41568	7.94328e-06	0.03492	2.48837e-05	0.500038	0.840913	1.01926	-6.52501	-7.98077	1212.42	5.11662e-08	1.40279e-07	1.2719e-06	1.21657e-07	2.71002e-06	7.57474e-07	1.47532e-05	33891	0.454495	1.45238e-05	115851	25917.5
3367	78	13	9	1.6	0.56	6.3	6	74	0.1	sandy loam	0.2	13	0.9632	0.957113	5.01187e-07	0.0288	2.62541e-05	0.525488	0.851414	0.788713	-6.92796	-9.05715	1733.08	5.14678e-09	1.19244e-07	1.26313e-06	2.32695e-08	1.81058e-07	6.2781e-07	2.72604e-06	183417	0.4729	1.13275e-06	159095	15631.4
3368	17	31	52	1.22	1.25	5.8	26	78	0.1	clay (light)	0.2	24	2.15	1.29668	1.58489e-06	0.20066	0.00110869	0.308815	0.74546	0.973213	-6.64665	-8.71807	1674.06	1.1848e-08	1.22307e-07	1.26441e-06	3.75965e-08	5.4932e-07	6.75915e-07	7.06419e-06	70779.6	0.391743	2.12069e-06	154364	9076.8
3369	37	40	23	1.38	1.07	6.2	13	88	0.1	loam	0.32	23	1.8404	1.17939	6.30957e-07	0.08447	0.000241459	0.389683	0.790092	1.01095	-6.69776	-9.02741	1804.69	5.94924e-09	1.19611e-07	1.26329e-06	2.49851e-08	2.25157e-07	6.35881e-07	6.33976e-06	78867.4	0.445882	1.34898e-06	164778	7816.68
3370	17	31	52	1.22	1.25	5.8	26	78	0.1	clay (light)	0.2	24	2.15	1.29668	1.58489e-06	0.20066	0.00110869	0.308815	0.74546	0.973213	-6.64665	-8.71807	1674.06	1.1848e-08	1.22307e-07	1.26441e-06	3.75965e-08	5.4932e-07	6.75915e-07	7.06419e-06	70779.6	0.391743	2.12069e-06	154364	9076.8
3371	33	45	22	1.38	3.71	5.5	18	34	0.1	loam	0.32	23	6.3812	1.69258	3.16228e-06	0.09054	4.62285e-12	0.381878	0.786106	1.02667	-6.43411	-8.79526	983.433	2.16021e-08	1.26766e-07	1.26627e-06	5.84503e-08	1.08535e-06	6.73479e-07	1.22489e-05	40819.9	0.462318	2.22038e-06	95693.4	4009.8
3372	15	30	55	1.21	2.19	6.3	32	87	0.1	clay (light)	0.2	24	3.7668	1.38946	5.01187e-07	0.23636	0.000571605	0.298717	0.73929	0.974649	-6.64068	-9.43365	1651.22	5.14678e-09	1.19244e-07	1.26313e-06	2.32695e-08	1.81058e-07	6.42531e-07	4.81407e-06	103862	0.393041	4.10235e-07	152522	2554.23
3373	34	48	18	1.41	3.08	6.5	35	82	0.1	loam	0.32	23	5.2976	1.46358	3.16228e-07	0.27791	0.000218457	0.29093	0.734425	1.03971	-6.58456	-9.71276	1390.59	4.00306e-09	1.18721e-07	1.26292e-06	2.08242e-08	1.18206e-07	6.29775e-07	6.90607e-06	72400.1	0.476414	2.55001e-07	131041	1152.59
3374	40	30	30	1.35	0.68	6.2	6	75	0.1	clay loam	0.18	23	1.1696	1.03567	6.30957e-07	0.02157	4.48497e-09	0.56362	0.866456	0.986688	-6.77073	-8.87184	2134.87	5.94924e-09	1.19611e-07	1.26329e-06	2.49851e-08	2.25157e-07	6.29364e-07	2.46135e-06	203140	0.421657	1.17355e-06	190212	19120.3
3375	40	30	30	1.35	0.68	6.2	6	75	0.1	clay loam	0.18	23	1.1696	1.03567	6.30957e-07	0.02157	4.48497e-09	0.56362	0.866456	0.986688	-6.77073	-8.87184	2134.87	5.94924e-09	1.19611e-07	1.26329e-06	2.49851e-08	2.25157e-07	6.29364e-07	2.46135e-06	203140	0.421657	1.17355e-06	190212	19120.3
3376	34	48	18	1.41	3.08	6.5	35	82	0.1	loam	0.32	23	5.2976	1.46358	3.16228e-07	0.27791	0.000218457	0.29093	0.734425	1.03971	-6.58456	-9.71276	1390.59	4.00306e-09	1.18721e-07	1.26292e-06	2.08242e-08	1.18206e-07	6.29775e-07	6.90607e-06	72400.1	0.476414	2.55001e-07	131041	1152.59
3377	34	48	18	1.41	3.08	6.5	35	82	0.1	loam	0.32	23	5.2976	1.46358	3.16228e-07	0.27791	0.000218457	0.29093	0.734425	1.03971	-6.58456	-9.71276	1390.59	4.00306e-09	1.18721e-07	1.26292e-06	2.08242e-08	1.18206e-07	6.29775e-07	6.90607e-06	72400.1	0.476414	2.55001e-07	131041	1152.59
3378	34	48	18	1.41	3.08	6.5	35	82	0.1	loam	0.32	23	5.2976	1.46358	3.16228e-07	0.27791	0.000218457	0.29093	0.734425	1.03971	-6.58456	-9.71276	1390.59	4.00306e-09	1.18721e-07	1.26292e-06	2.08242e-08	1.18206e-07	6.29775e-07	6.90607e-06	72400.1	0.476414	2.55001e-07	131041	1152.59
3379	34	48	18	1.41	3.08	6.5	35	82	0.1	loam	0.32	23	5.2976	1.46358	3.16228e-07	0.27791	0.000218457	0.29093	0.734425	1.03971	-6.58456	-9.71276	1390.59	4.00306e-09	1.18721e-07	1.26292e-06	2.08242e-08	1.18206e-07	6.29775e-07	6.90607e-06	72400.1	0.476414	2.55001e-07	131041	1152.59
3380	73	18	9	1.59	1.4	7.5	12	75	0.1	sandy loam	0.2	13	2.408	1.04361	3.16228e-08	0.11474	6.78084e-11	0.356698	0.772814	0.797865	-6.96556	-10.6039	1889.82	2.24315e-09	1.17917e-07	1.26258e-06	1.70616e-08	2.1492e-08	6.18918e-07	2.31786e-06	215716	0.482972	3.16921e-08	171455	566.116
3382	73	18	9	1.59	1.4	7.5	12	75	0.1	sandy loam	0.2	13	2.408	1.04361	3.16228e-08	0.11474	6.78084e-11	0.356698	0.772814	0.797865	-6.96556	-10.6039	1889.82	2.24315e-09	1.17917e-07	1.26258e-06	1.70616e-08	2.1492e-08	6.18918e-07	2.31786e-06	215716	0.482972	3.16921e-08	171455	566.116
3383	73	18	9	1.59	1.4	7.5	12	75	0.1	sandy loam	0.2	13	2.408	1.04361	3.16228e-08	0.11474	6.78084e-11	0.356698	0.772814	0.797865	-6.96556	-10.6039	1889.82	2.24315e-09	1.17917e-07	1.26258e-06	1.70616e-08	2.1492e-08	6.18918e-07	2.31786e-06	215716	0.482972	3.16921e-08	171455	566.116
3384	73	18	9	1.59	1.4	7.5	12	75	0.1	sandy loam	0.2	13	2.408	1.04361	3.16228e-08	0.11474	6.78084e-11	0.356698	0.772814	0.797865	-6.96556	-10.6039	1889.82	2.24315e-09	1.17917e-07	1.26258e-06	1.70616e-08	2.1492e-08	6.18918e-07	2.31786e-06	215716	0.482972	3.16921e-08	171455	566.116
3386	73	18	9	1.59	1.4	7.5	12	75	0.1	sandy loam	0.2	13	2.408	1.04361	3.16228e-08	0.11474	6.78084e-11	0.356698	0.772814	0.797865	-6.96556	-10.6039	1889.82	2.24315e-09	1.17917e-07	1.26258e-06	1.70616e-08	2.1492e-08	6.18918e-07	2.31786e-06	215716	0.482972	3.16921e-08	171455	566.116
3387	73	18	9	1.59	1.4	7.5	12	75	0.1	sandy loam	0.2	13	2.408	1.04361	3.16228e-08	0.11474	6.78084e-11	0.356698	0.772814	0.797865	-6.96556	-10.6039	1889.82	2.24315e-09	1.17917e-07	1.26258e-06	1.70616e-08	2.1492e-08	6.18918e-07	2.31786e-06	215716	0.482972	3.16921e-08	171455	566.116
3388	73	18	9	1.59	1.4	7.5	12	75	0.1	sandy loam	0.2	13	2.408	1.04361	3.16228e-08	0.11474	6.78084e-11	0.356698	0.772814	0.797865	-6.96556	-10.6039	1889.82	2.24315e-09	1.17917e-07	1.26258e-06	1.70616e-08	2.1492e-08	6.18918e-07	2.31786e-06	215716	0.482972	3.16921e-08	171455	566.116
3389	73	18	9	1.59	1.4	7.5	12	75	0.1	sandy loam	0.2	13	2.408	1.04361	3.16228e-08	0.11474	6.78084e-11	0.356698	0.772814	0.797865	-6.96556	-10.6039	1889.82	2.24315e-09	1.17917e-07	1.26258e-06	1.70616e-08	2.1492e-08	6.18918e-07	2.31786e-06	215716	0.482972	3.16921e-08	171455	566.116
3390	73	18	9	1.59	1.4	7.5	12	75	0.1	sandy loam	0.2	13	2.408	1.04361	3.16228e-08	0.11474	6.78084e-11	0.356698	0.772814	0.797865	-6.96556	-10.6039	1889.82	2.24315e-09	1.17917e-07	1.26258e-06	1.70616e-08	2.1492e-08	6.18918e-07	2.31786e-06	215716	0.482972	3.16921e-08	171455	566.116
3391	73	18	9	1.59	1.4	7.5	12	75	0.1	sandy loam	0.2	13	2.408	1.04361	3.16228e-08	0.11474	6.78084e-11	0.356698	0.772814	0.797865	-6.96556	-10.6039	1889.82	2.24315e-09	1.17917e-07	1.26258e-06	1.70616e-08	2.1492e-08	6.18918e-07	2.31786e-06	215716	0.482972	3.16921e-08	171455	566.116
3392	73	18	9	1.59	1.4	7.5	12	75	0.1	sandy loam	0.2	13	2.408	1.04361	3.16228e-08	0.11474	6.78084e-11	0.356698	0.772814	0.797865	-6.96556	-10.6039	1889.82	2.24315e-09	1.17917e-07	1.26258e-06	1.70616e-08	2.1492e-08	6.18918e-07	2.31786e-06	215716	0.482972	3.16921e-08	171455	566.116
3393	73	18	9	1.59	1.4	7.5	12	75	0.1	sandy loam	0.2	13	2.408	1.04361	3.16228e-08	0.11474	6.78084e-11	0.356698	0.772814	0.797865	-6.96556	-10.6039	1889.82	2.24315e-09	1.17917e-07	1.26258e-06	1.70616e-08	2.1492e-08	6.18918e-07	2.31786e-06	215716	0.482972	3.16921e-08	171455	566.116
3397	73	18	9	1.59	1.4	7.5	12	75	0.1	sandy loam	0.2	13	2.408	1.04361	3.16228e-08	0.11474	6.78084e-11	0.356698	0.772814	0.797865	-6.96556	-10.6039	1889.82	2.24315e-09	1.17917e-07	1.26258e-06	1.70616e-08	2.1492e-08	6.18918e-07	2.31786e-06	215716	0.482972	3.16921e-08	171455	566.116
3406	19	32	49	1.24	1.26	6.4	27	93	0.1	clay (light)	0.2	24	2.1672	1.19721	3.98107e-07	0.24041	0.000606043	0.297792	0.738717	0.977705	-6.72351	-9.31751	1998.16	4.50937e-09	1.18953e-07	1.26301e-06	2.19067e-08	1.4603e-07	6.41664e-07	4.50896e-06	110890	0.395817	5.19375e-07	179832	4099.54
3407	37	44	19	1.41	0.82	6	14	83	0.1	loam	0.32	23	1.4104	1.12902	1e-06	0.10948	0.000576143	0.361492	0.775398	1.02248	-6.69827	-8.71521	1806.82	8.23128e-09	1.20654e-07	1.26372e-06	2.9864e-08	3.50564e-07	6.51347e-07	8.04521e-06	62148.8	0.457879	2.63835e-06	164946	12383.9
3408	37	44	19	1.41	0.82	6	14	83	0.1	loam	0.32	23	1.4104	1.12902	1e-06	0.10948	0.000576143	0.361492	0.775398	1.02248	-6.69827	-8.71521	1806.82	8.23128e-09	1.20654e-07	1.26372e-06	2.9864e-08	3.50564e-07	6.51347e-07	8.04521e-06	62148.8	0.457879	2.63835e-06	164946	12383.9
3409	37	44	19	1.41	0.82	6	14	83	0.1	loam	0.32	23	1.4104	1.12902	1e-06	0.10948	0.000576143	0.361492	0.775398	1.02248	-6.69827	-8.71521	1806.82	8.23128e-09	1.20654e-07	1.26372e-06	2.9864e-08	3.50564e-07	6.51347e-07	8.04521e-06	62148.8	0.457879	2.63835e-06	164946	12383.9
3411	37	44	19	1.41	0.82	6	14	83	0.1	loam	0.32	23	1.4104	1.12902	1e-06	0.10948	0.000576143	0.361492	0.775398	1.02248	-6.69827	-8.71521	1806.82	8.23128e-09	1.20654e-07	1.26372e-06	2.9864e-08	3.50564e-07	6.51347e-07	8.04521e-06	62148.8	0.457879	2.63835e-06	164946	12383.9
3412	56	22	22	1.42	1.11	6.4	22	87	0.1	sandy clay loam	0.16	13	1.9092	1.15702	3.98107e-07	0.21091	0.000472223	0.305523	0.743466	0.729168	-6.88896	-9.46983	1584.22	4.50937e-09	1.18953e-07	1.26301e-06	2.19067e-08	1.4603e-07	6.38052e-07	3.51258e-06	142346	0.412311	4.52813e-07	147082	3908.83
3413	37	44	19	1.41	0.82	6	14	83	0.1	loam	0.32	23	1.4104	1.12902	1e-06	0.10948	0.000576143	0.361492	0.775398	1.02248	-6.69827	-8.71521	1806.82	8.23128e-09	1.20654e-07	1.26372e-06	2.9864e-08	3.50564e-07	6.51347e-07	8.04521e-06	62148.8	0.457879	2.63835e-06	164946	12383.9
3415	37	44	19	1.41	0.82	6	14	83	0.1	loam	0.32	23	1.4104	1.12902	1e-06	0.10948	0.000576143	0.361492	0.775398	1.02248	-6.69827	-8.71521	1806.82	8.23128e-09	1.20654e-07	1.26372e-06	2.9864e-08	3.50564e-07	6.51347e-07	8.04521e-06	62148.8	0.457879	2.63835e-06	164946	12383.9
3416	37	44	19	1.41	0.82	6	14	83	0.1	loam	0.32	23	1.4104	1.12902	1e-06	0.10948	0.000576143	0.361492	0.775398	1.02248	-6.69827	-8.71521	1806.82	8.23128e-09	1.20654e-07	1.26372e-06	2.9864e-08	3.50564e-07	6.51347e-07	8.04521e-06	62148.8	0.457879	2.63835e-06	164946	12383.9
3417	56	22	22	1.42	1.11	6.4	22	87	0.1	sandy clay loam	0.16	13	1.9092	1.15702	3.98107e-07	0.21091	0.000472223	0.305523	0.743466	0.729168	-6.88896	-9.46983	1584.22	4.50937e-09	1.18953e-07	1.26301e-06	2.19067e-08	1.4603e-07	6.38052e-07	3.51258e-06	142346	0.412311	4.52813e-07	147082	3908.83
3418	37	44	19	1.41	0.82	6	14	83	0.1	loam	0.32	23	1.4104	1.12902	1e-06	0.10948	0.000576143	0.361492	0.775398	1.02248	-6.69827	-8.71521	1806.82	8.23128e-09	1.20654e-07	1.26372e-06	2.9864e-08	3.50564e-07	6.51347e-07	8.04521e-06	62148.8	0.457879	2.63835e-06	164946	12383.9
3419	37	44	19	1.41	0.82	6	14	83	0.1	loam	0.32	23	1.4104	1.12902	1e-06	0.10948	0.000576143	0.361492	0.775398	1.02248	-6.69827	-8.71521	1806.82	8.23128e-09	1.20654e-07	1.26372e-06	2.9864e-08	3.50564e-07	6.51347e-07	8.04521e-06	62148.8	0.457879	2.63835e-06	164946	12383.9
3420	37	44	19	1.41	0.82	6	14	83	0.1	loam	0.32	23	1.4104	1.12902	1e-06	0.10948	0.000576143	0.361492	0.775398	1.02248	-6.69827	-8.71521	1806.82	8.23128e-09	1.20654e-07	1.26372e-06	2.9864e-08	3.50564e-07	6.51347e-07	8.04521e-06	62148.8	0.457879	2.63835e-06	164946	12383.9
3421	56	22	22	1.42	1.11	6.4	22	87	0.1	sandy clay loam	0.16	13	1.9092	1.15702	3.98107e-07	0.21091	0.000472223	0.305523	0.743466	0.729168	-6.88896	-9.46983	1584.22	4.50937e-09	1.18953e-07	1.26301e-06	2.19067e-08	1.4603e-07	6.38052e-07	3.51258e-06	142346	0.412311	4.52813e-07	147082	3908.83
3422	37	44	19	1.41	0.82	6	14	83	0.1	loam	0.32	23	1.4104	1.12902	1e-06	0.10948	0.000576143	0.361492	0.775398	1.02248	-6.69827	-8.71521	1806.82	8.23128e-09	1.20654e-07	1.26372e-06	2.9864e-08	3.50564e-07	6.51347e-07	8.04521e-06	62148.8	0.457879	2.63835e-06	164946	12383.9
3423	37	44	19	1.41	0.82	6	14	83	0.1	loam	0.32	23	1.4104	1.12902	1e-06	0.10948	0.000576143	0.361492	0.775398	1.02248	-6.69827	-8.71521	1806.82	8.23128e-09	1.20654e-07	1.26372e-06	2.9864e-08	3.50564e-07	6.51347e-07	8.04521e-06	62148.8	0.457879	2.63835e-06	164946	12383.9
3424	56	22	22	1.42	1.11	6.4	22	87	0.1	sandy clay loam	0.16	13	1.9092	1.15702	3.98107e-07	0.21091	0.000472223	0.305523	0.743466	0.729168	-6.88896	-9.46983	1584.22	4.50937e-09	1.18953e-07	1.26301e-06	2.19067e-08	1.4603e-07	6.38052e-07	3.51258e-06	142346	0.412311	4.52813e-07	147082	3908.83
3425	37	44	19	1.41	0.82	6	14	83	0.1	loam	0.32	23	1.4104	1.12902	1e-06	0.10948	0.000576143	0.361492	0.775398	1.02248	-6.69827	-8.71521	1806.82	8.23128e-09	1.20654e-07	1.26372e-06	2.9864e-08	3.50564e-07	6.51347e-07	8.04521e-06	62148.8	0.457879	2.63835e-06	164946	12383.9
3426	37	44	19	1.41	0.82	6	14	83	0.1	loam	0.32	23	1.4104	1.12902	1e-06	0.10948	0.000576143	0.361492	0.775398	1.02248	-6.69827	-8.71521	1806.82	8.23128e-09	1.20654e-07	1.26372e-06	2.9864e-08	3.50564e-07	6.51347e-07	8.04521e-06	62148.8	0.457879	2.63835e-06	164946	12383.9
3427	37	44	19	1.41	0.82	6	14	83	0.1	loam	0.32	23	1.4104	1.12902	1e-06	0.10948	0.000576143	0.361492	0.775398	1.02248	-6.69827	-8.71521	1806.82	8.23128e-09	1.20654e-07	1.26372e-06	2.9864e-08	3.50564e-07	6.51347e-07	8.04521e-06	62148.8	0.457879	2.63835e-06	164946	12383.9
3428	37	44	19	1.41	0.82	6	14	83	0.1	loam	0.32	23	1.4104	1.12902	1e-06	0.10948	0.000576143	0.361492	0.775398	1.02248	-6.69827	-8.71521	1806.82	8.23128e-09	1.20654e-07	1.26372e-06	2.9864e-08	3.50564e-07	6.51347e-07	8.04521e-06	62148.8	0.457879	2.63835e-06	164946	12383.9
3429	56	22	22	1.42	1.11	6.4	22	87	0.1	sandy clay loam	0.16	13	1.9092	1.15702	3.98107e-07	0.21091	0.000472223	0.305523	0.743466	0.729168	-6.88896	-9.46983	1584.22	4.50937e-09	1.18953e-07	1.26301e-06	2.19067e-08	1.4603e-07	6.38052e-07	3.51258e-06	142346	0.412311	4.52813e-07	147082	3908.83
3430	37	44	19	1.41	0.82	6	14	83	0.1	loam	0.32	23	1.4104	1.12902	1e-06	0.10948	0.000576143	0.361492	0.775398	1.02248	-6.69827	-8.71521	1806.82	8.23128e-09	1.20654e-07	1.26372e-06	2.9864e-08	3.50564e-07	6.51347e-07	8.04521e-06	62148.8	0.457879	2.63835e-06	164946	12383.9
3431	37	44	19	1.41	0.82	6	14	83	0.1	loam	0.32	23	1.4104	1.12902	1e-06	0.10948	0.000576143	0.361492	0.775398	1.02248	-6.69827	-8.71521	1806.82	8.23128e-09	1.20654e-07	1.26372e-06	2.9864e-08	3.50564e-07	6.51347e-07	8.04521e-06	62148.8	0.457879	2.63835e-06	164946	12383.9
3432	37	44	19	1.41	0.82	6	14	83	0.1	loam	0.32	23	1.4104	1.12902	1e-06	0.10948	0.000576143	0.361492	0.775398	1.02248	-6.69827	-8.71521	1806.82	8.23128e-09	1.20654e-07	1.26372e-06	2.9864e-08	3.50564e-07	6.51347e-07	8.04521e-06	62148.8	0.457879	2.63835e-06	164946	12383.9
3437	26	33	41	1.27	30.73	4.4	77	58	0.1	clay (light)	0.2	16	52.8556	2.54986	3.98107e-05	0.43119	2.13795e-11	0.283892	0.729942	0.819991	-6.13796	-8.67986	345.929	2.48224e-07	2.30352e-07	1.30945e-06	5.42959e-07	1.35391e-05	1.31219e-06	4.24045e-05	11791.2	0.412925	3.16566e-06	35478.1	546.832
3438	26	33	41	1.27	30.73	4.4	77	58	0.1	clay (light)	0.2	16	52.8556	2.54986	3.98107e-05	0.43119	2.13795e-11	0.283892	0.729942	0.819991	-6.13796	-8.67986	345.929	2.48224e-07	2.30352e-07	1.30945e-06	5.42959e-07	1.35391e-05	1.31219e-06	4.24045e-05	11791.2	0.412925	3.16566e-06	35478.1	546.832
3439	26	33	41	1.27	30.73	4.4	77	58	0.1	clay (light)	0.2	16	52.8556	2.54986	3.98107e-05	0.43119	2.13795e-11	0.283892	0.729942	0.819991	-6.13796	-8.67986	345.929	2.48224e-07	2.30352e-07	1.30945e-06	5.42959e-07	1.35391e-05	1.31219e-06	4.24045e-05	11791.2	0.412925	3.16566e-06	35478.1	546.832
3440	26	33	41	1.27	30.73	4.4	77	58	0.1	clay (light)	0.2	16	52.8556	2.54986	3.98107e-05	0.43119	2.13795e-11	0.283892	0.729942	0.819991	-6.13796	-8.67986	345.929	2.48224e-07	2.30352e-07	1.30945e-06	5.42959e-07	1.35391e-05	1.31219e-06	4.24045e-05	11791.2	0.412925	3.16566e-06	35478.1	546.832
3441	26	33	41	1.27	30.73	4.4	77	58	0.1	clay (light)	0.2	16	52.8556	2.54986	3.98107e-05	0.43119	2.13795e-11	0.283892	0.729942	0.819991	-6.13796	-8.67986	345.929	2.48224e-07	2.30352e-07	1.30945e-06	5.42959e-07	1.35391e-05	1.31219e-06	4.24045e-05	11791.2	0.412925	3.16566e-06	35478.1	546.832
3442	26	33	41	1.27	30.73	4.4	77	58	0.1	clay (light)	0.2	16	52.8556	2.54986	3.98107e-05	0.43119	2.13795e-11	0.283892	0.729942	0.819991	-6.13796	-8.67986	345.929	2.48224e-07	2.30352e-07	1.30945e-06	5.42959e-07	1.35391e-05	1.31219e-06	4.24045e-05	11791.2	0.412925	3.16566e-06	35478.1	546.832
3443	26	33	41	1.27	30.73	4.4	77	58	0.1	clay (light)	0.2	16	52.8556	2.54986	3.98107e-05	0.43119	2.13795e-11	0.283892	0.729942	0.819991	-6.13796	-8.67986	345.929	2.48224e-07	2.30352e-07	1.30945e-06	5.42959e-07	1.35391e-05	1.31219e-06	4.24045e-05	11791.2	0.412925	3.16566e-06	35478.1	546.832
3444	18	61	21	1.36	35.27	4.8	121	50	0.1	silt loam	0.35	16	60.6644	2.52554	1.58489e-05	0.7134	4.42468e-12	0.316638	0.750137	0.871054	-6.14328	-9.09176	350.198	1.00052e-07	1.62624e-07	1.28122e-06	2.26173e-07	5.39649e-06	8.94581e-07	3.73934e-05	13371.4	0.464445	1.78158e-06	35902.9	397.231
3445	18	61	21	1.36	35.27	4.8	121	50	0.1	silt loam	0.35	16	60.6644	2.52554	1.58489e-05	0.7134	4.42468e-12	0.316638	0.750137	0.871054	-6.14328	-9.09176	350.198	1.00052e-07	1.62624e-07	1.28122e-06	2.26173e-07	5.39649e-06	8.94581e-07	3.73934e-05	13371.4	0.464445	1.78158e-06	35902.9	397.231
3446	18	61	21	1.36	35.27	4.8	121	50	0.1	silt loam	0.35	16	60.6644	2.52554	1.58489e-05	0.7134	4.42468e-12	0.316638	0.750137	0.871054	-6.14328	-9.09176	350.198	1.00052e-07	1.62624e-07	1.28122e-06	2.26173e-07	5.39649e-06	8.94581e-07	3.73934e-05	13371.4	0.464445	1.78158e-06	35902.9	397.231
3447	18	61	21	1.36	35.27	4.8	121	50	0.1	silt loam	0.35	16	60.6644	2.52554	1.58489e-05	0.7134	4.42468e-12	0.316638	0.750137	0.871054	-6.14328	-9.09176	350.198	1.00052e-07	1.62624e-07	1.28122e-06	2.26173e-07	5.39649e-06	8.94581e-07	3.73934e-05	13371.4	0.464445	1.78158e-06	35902.9	397.231
3448	18	61	21	1.36	35.27	4.8	121	50	0.1	silt loam	0.35	16	60.6644	2.52554	1.58489e-05	0.7134	4.42468e-12	0.316638	0.750137	0.871054	-6.14328	-9.09176	350.198	1.00052e-07	1.62624e-07	1.28122e-06	2.26173e-07	5.39649e-06	8.94581e-07	3.73934e-05	13371.4	0.464445	1.78158e-06	35902.9	397.231
3449	18	61	21	1.36	35.27	4.8	121	50	0.1	silt loam	0.35	16	60.6644	2.52554	1.58489e-05	0.7134	4.42468e-12	0.316638	0.750137	0.871054	-6.14328	-9.09176	350.198	1.00052e-07	1.62624e-07	1.28122e-06	2.26173e-07	5.39649e-06	8.94581e-07	3.73934e-05	13371.4	0.464445	1.78158e-06	35902.9	397.231
3450	18	61	21	1.36	35.27	4.8	121	50	0.1	silt loam	0.35	16	60.6644	2.52554	1.58489e-05	0.7134	4.42468e-12	0.316638	0.750137	0.871054	-6.14328	-9.09176	350.198	1.00052e-07	1.62624e-07	1.28122e-06	2.26173e-07	5.39649e-06	8.94581e-07	3.73934e-05	13371.4	0.464445	1.78158e-06	35902.9	397.231
3451	18	61	21	1.36	35.27	4.8	121	50	0.1	silt loam	0.35	16	60.6644	2.52554	1.58489e-05	0.7134	4.42468e-12	0.316638	0.750137	0.871054	-6.14328	-9.09176	350.198	1.00052e-07	1.62624e-07	1.28122e-06	2.26173e-07	5.39649e-06	8.94581e-07	3.73934e-05	13371.4	0.464445	1.78158e-06	35902.9	397.231
3452	85	11	4	1.73	2.09	4.5	10	16	0.1	loamy sand	0.17	13	3.5948	1.68064	3.16228e-05	0.02844	3.44835e-06	0.527152	0.852087	0.862091	-6.4725	-7.70676	607.23	1.97593e-07	2.07209e-07	1.2998e-06	4.34711e-07	1.07567e-05	1.16958e-06	1.66826e-05	29971.4	0.559948	1.68516e-05	60924.3	17230.1
3454	85	11	4	1.73	2.09	4.5	10	16	0.1	loamy sand	0.17	13	3.5948	1.68064	3.16228e-05	0.02844	3.44835e-06	0.527152	0.852087	0.862091	-6.4725	-7.70676	607.23	1.97593e-07	2.07209e-07	1.2998e-06	4.34711e-07	1.07567e-05	1.16958e-06	1.66826e-05	29971.4	0.559948	1.68516e-05	60924.3	17230.1
3456	85	11	4	1.73	2.09	4.5	10	16	0.1	loamy sand	0.17	13	3.5948	1.68064	3.16228e-05	0.02844	3.44835e-06	0.527152	0.852087	0.862091	-6.4725	-7.70676	607.23	1.97593e-07	2.07209e-07	1.2998e-06	4.34711e-07	1.07567e-05	1.16958e-06	1.66826e-05	29971.4	0.559948	1.68516e-05	60924.3	17230.1
3457	85	11	4	1.73	2.09	4.5	10	16	0.1	loamy sand	0.17	13	3.5948	1.68064	3.16228e-05	0.02844	3.44835e-06	0.527152	0.852087	0.862091	-6.4725	-7.70676	607.23	1.97593e-07	2.07209e-07	1.2998e-06	4.34711e-07	1.07567e-05	1.16958e-06	1.66826e-05	29971.4	0.559948	1.68516e-05	60924.3	17230.1
3458	54	38	8	1.57	4.63	4.6	21	24	0.1	sandy loam	0.2	13	7.9636	1.91581	2.51189e-05	0.09679	1.88706e-06	0.374543	0.782304	0.81856	-6.40956	-8.14946	525.304	1.57375e-07	1.88826e-07	1.29214e-06	3.48727e-07	8.5466e-06	1.05619e-06	2.386e-05	20955.6	0.506543	8.71371e-06	53064.9	4908.25
3459	54	38	8	1.57	4.63	4.6	21	24	0.1	sandy loam	0.2	13	7.9636	1.91581	2.51189e-05	0.09679	1.88706e-06	0.374543	0.782304	0.81856	-6.40956	-8.14946	525.304	1.57375e-07	1.88826e-07	1.29214e-06	3.48727e-07	8.5466e-06	1.05619e-06	2.386e-05	20955.6	0.506543	8.71371e-06	53064.9	4908.25
3460	85	11	4	1.73	2.09	4.5	10	16	0.1	loamy sand	0.17	13	3.5948	1.68064	3.16228e-05	0.02844	3.44835e-06	0.527152	0.852087	0.862091	-6.4725	-7.70676	607.23	1.97593e-07	2.07209e-07	1.2998e-06	4.34711e-07	1.07567e-05	1.16958e-06	1.66826e-05	29971.4	0.559948	1.68516e-05	60924.3	17230.1
3461	85	11	4	1.73	2.09	4.5	10	16	0.1	loamy sand	0.17	13	3.5948	1.68064	3.16228e-05	0.02844	3.44835e-06	0.527152	0.852087	0.862091	-6.4725	-7.70676	607.23	1.97593e-07	2.07209e-07	1.2998e-06	4.34711e-07	1.07567e-05	1.16958e-06	1.66826e-05	29971.4	0.559948	1.68516e-05	60924.3	17230.1
3462	54	38	8	1.57	4.63	4.6	21	24	0.1	sandy loam	0.2	13	7.9636	1.91581	2.51189e-05	0.09679	1.88706e-06	0.374543	0.782304	0.81856	-6.40956	-8.14946	525.304	1.57375e-07	1.88826e-07	1.29214e-06	3.48727e-07	8.5466e-06	1.05619e-06	2.386e-05	20955.6	0.506543	8.71371e-06	53064.9	4908.25
3463	54	38	8	1.57	4.63	4.6	21	24	0.1	sandy loam	0.2	13	7.9636	1.91581	2.51189e-05	0.09679	1.88706e-06	0.374543	0.782304	0.81856	-6.40956	-8.14946	525.304	1.57375e-07	1.88826e-07	1.29214e-06	3.48727e-07	8.5466e-06	1.05619e-06	2.386e-05	20955.6	0.506543	8.71371e-06	53064.9	4908.25
3464	85	11	4	1.73	2.09	4.5	10	16	0.1	loamy sand	0.17	13	3.5948	1.68064	3.16228e-05	0.02844	3.44835e-06	0.527152	0.852087	0.862091	-6.4725	-7.70676	607.23	1.97593e-07	2.07209e-07	1.2998e-06	4.34711e-07	1.07567e-05	1.16958e-06	1.66826e-05	29971.4	0.559948	1.68516e-05	60924.3	17230.1
3465	85	11	4	1.73	2.09	4.5	10	16	0.1	loamy sand	0.17	13	3.5948	1.68064	3.16228e-05	0.02844	3.44835e-06	0.527152	0.852087	0.862091	-6.4725	-7.70676	607.23	1.97593e-07	2.07209e-07	1.2998e-06	4.34711e-07	1.07567e-05	1.16958e-06	1.66826e-05	29971.4	0.559948	1.68516e-05	60924.3	17230.1
3466	85	11	4	1.73	2.09	4.5	10	16	0.1	loamy sand	0.17	13	3.5948	1.68064	3.16228e-05	0.02844	3.44835e-06	0.527152	0.852087	0.862091	-6.4725	-7.70676	607.23	1.97593e-07	2.07209e-07	1.2998e-06	4.34711e-07	1.07567e-05	1.16958e-06	1.66826e-05	29971.4	0.559948	1.68516e-05	60924.3	17230.1
3467	54	38	8	1.57	4.63	4.6	21	24	0.1	sandy loam	0.2	13	7.9636	1.91581	2.51189e-05	0.09679	1.88706e-06	0.374543	0.782304	0.81856	-6.40956	-8.14946	525.304	1.57375e-07	1.88826e-07	1.29214e-06	3.48727e-07	8.5466e-06	1.05619e-06	2.386e-05	20955.6	0.506543	8.71371e-06	53064.9	4908.25
3468	85	11	4	1.73	2.09	4.5	10	16	0.1	loamy sand	0.17	13	3.5948	1.68064	3.16228e-05	0.02844	3.44835e-06	0.527152	0.852087	0.862091	-6.4725	-7.70676	607.23	1.97593e-07	2.07209e-07	1.2998e-06	4.34711e-07	1.07567e-05	1.16958e-06	1.66826e-05	29971.4	0.559948	1.68516e-05	60924.3	17230.1
3469	85	11	4	1.73	2.09	4.5	10	16	0.1	loamy sand	0.17	13	3.5948	1.68064	3.16228e-05	0.02844	3.44835e-06	0.527152	0.852087	0.862091	-6.4725	-7.70676	607.23	1.97593e-07	2.07209e-07	1.2998e-06	4.34711e-07	1.07567e-05	1.16958e-06	1.66826e-05	29971.4	0.559948	1.68516e-05	60924.3	17230.1
3470	85	11	4	1.73	2.09	4.5	10	16	0.1	loamy sand	0.17	13	3.5948	1.68064	3.16228e-05	0.02844	3.44835e-06	0.527152	0.852087	0.862091	-6.4725	-7.70676	607.23	1.97593e-07	2.07209e-07	1.2998e-06	4.34711e-07	1.07567e-05	1.16958e-06	1.66826e-05	29971.4	0.559948	1.68516e-05	60924.3	17230.1
3471	54	38	8	1.57	4.63	4.6	21	24	0.1	sandy loam	0.2	13	7.9636	1.91581	2.51189e-05	0.09679	1.88706e-06	0.374543	0.782304	0.81856	-6.40956	-8.14946	525.304	1.57375e-07	1.88826e-07	1.29214e-06	3.48727e-07	8.5466e-06	1.05619e-06	2.386e-05	20955.6	0.506543	8.71371e-06	53064.9	4908.25
3472	54	38	8	1.57	4.63	4.6	21	24	0.1	sandy loam	0.2	13	7.9636	1.91581	2.51189e-05	0.09679	1.88706e-06	0.374543	0.782304	0.81856	-6.40956	-8.14946	525.304	1.57375e-07	1.88826e-07	1.29214e-06	3.48727e-07	8.5466e-06	1.05619e-06	2.386e-05	20955.6	0.506543	8.71371e-06	53064.9	4908.25
3473	54	38	8	1.57	4.63	4.6	21	24	0.1	sandy loam	0.2	13	7.9636	1.91581	2.51189e-05	0.09679	1.88706e-06	0.374543	0.782304	0.81856	-6.40956	-8.14946	525.304	1.57375e-07	1.88826e-07	1.29214e-06	3.48727e-07	8.5466e-06	1.05619e-06	2.386e-05	20955.6	0.506543	8.71371e-06	53064.9	4908.25
3474	83	11	6	1.67	0.5	6.6	5	94	0.1	loamy sand	0.17	13	0.86	0.870184	2.51189e-07	0.02764	2.14133e-05	0.530925	0.853608	0.817692	-6.96547	-9.28987	1889.41	3.60088e-09	1.18537e-07	1.26284e-06	1.99644e-08	9.61045e-08	6.23323e-07	1.89114e-06	264390	0.505532	5.04957e-07	171423	11569.6
3475	83	11	6	1.67	0.5	6.6	5	94	0.1	loamy sand	0.17	13	0.86	0.870184	2.51189e-07	0.02764	2.14133e-05	0.530925	0.853608	0.817692	-6.96547	-9.28987	1889.41	3.60088e-09	1.18537e-07	1.26284e-06	1.99644e-08	9.61045e-08	6.23323e-07	1.89114e-06	264390	0.505532	5.04957e-07	171423	11569.6
3476	47	34	19	1.43	0.97	6.4	12	79	0.1	loam	0.32	23	1.6684	1.11428	3.98107e-07	0.07639	9.23319e-05	0.401294	0.795913	1.02416	-6.72934	-9.17878	1940.8	4.50937e-09	1.18953e-07	1.26301e-06	2.19067e-08	1.4603e-07	6.27798e-07	5.33415e-06	93735.7	0.459651	8.91177e-07	175414	6735.36
3477	74	19	7	1.63	0.56	6	5	97	0.1	sandy loam	0.2	13	0.9632	1.00811	1e-06	0.0198	0.000122473	0.574823	0.87073	0.807376	-6.87648	-8.74203	1539.33	8.23128e-09	1.20654e-07	1.26372e-06	2.9864e-08	3.50564e-07	6.39101e-07	3.15216e-06	158621	0.493666	2.20049e-06	143405	24710.4
3478	36	55	9	1.52	1.12	5.7	11	76	0.1	silt loam	0.35	23	1.9264	1.27886	1.99526e-06	0.05534	0.000277119	0.440527	0.814691	1.08108	-6.58265	-8.48825	1384.48	1.43856e-08	1.23467e-07	1.26489e-06	4.30218e-08	6.88771e-07	6.60621e-07	9.48548e-06	52712.2	0.52403	3.9444e-06	130527	14221.6
3479	36	55	9	1.52	1.12	5.7	11	76	0.1	silt loam	0.35	23	1.9264	1.27886	1.99526e-06	0.05534	0.000277119	0.440527	0.814691	1.08108	-6.58265	-8.48825	1384.48	1.43856e-08	1.23467e-07	1.26489e-06	4.30218e-08	6.88771e-07	6.60621e-07	9.48548e-06	52712.2	0.52403	3.9444e-06	130527	14221.6
3480	63	22	15	1.5	1.83	5.8	23	67	0.1	sandy loam	0.2	13	3.1476	1.41753	1.58489e-06	0.16788	0.000487599	0.322036	0.753314	0.762605	-6.7239	-9.03599	1083.31	1.1848e-08	1.22307e-07	1.26441e-06	3.75965e-08	5.4932e-07	6.5915e-07	6.74587e-06	74119.4	0.445309	1.34719e-06	104576	4650
3481	74	19	7	1.63	0.56	6	5	97	0.1	sandy loam	0.2	13	0.9632	1.00811	1e-06	0.0198	0.000122473	0.574823	0.87073	0.807376	-6.87648	-8.74203	1539.33	8.23128e-09	1.20654e-07	1.26372e-06	2.9864e-08	3.50564e-07	6.39101e-07	3.15216e-06	158621	0.493666	2.20049e-06	143405	24710.4
3482	74	19	7	1.63	0.56	6	5	97	0.1	sandy loam	0.2	13	0.9632	1.00811	1e-06	0.0198	0.000122473	0.574823	0.87073	0.807376	-6.87648	-8.74203	1539.33	8.23128e-09	1.20654e-07	1.26372e-06	2.9864e-08	3.50564e-07	6.39101e-07	3.15216e-06	158621	0.493666	2.20049e-06	143405	24710.4
3483	74	19	7	1.63	0.56	6	5	97	0.1	sandy loam	0.2	13	0.9632	1.00811	1e-06	0.0198	0.000122473	0.574823	0.87073	0.807376	-6.87648	-8.74203	1539.33	8.23128e-09	1.20654e-07	1.26372e-06	2.9864e-08	3.50564e-07	6.39101e-07	3.15216e-06	158621	0.493666	2.20049e-06	143405	24710.4
3484	36	55	9	1.52	1.12	5.7	11	76	0.1	silt loam	0.35	23	1.9264	1.27886	1.99526e-06	0.05534	0.000277119	0.440527	0.814691	1.08108	-6.58265	-8.48825	1384.48	1.43856e-08	1.23467e-07	1.26489e-06	4.30218e-08	6.88771e-07	6.60621e-07	9.48548e-06	52712.2	0.52403	3.9444e-06	130527	14221.6
3485	74	19	7	1.63	0.56	6	5	97	0.1	sandy loam	0.2	13	0.9632	1.00811	1e-06	0.0198	0.000122473	0.574823	0.87073	0.807376	-6.87648	-8.74203	1539.33	8.23128e-09	1.20654e-07	1.26372e-06	2.9864e-08	3.50564e-07	6.39101e-07	3.15216e-06	158621	0.493666	2.20049e-06	143405	24710.4
3486	36	55	9	1.52	1.12	5.7	11	76	0.1	silt loam	0.35	23	1.9264	1.27886	1.99526e-06	0.05534	0.000277119	0.440527	0.814691	1.08108	-6.58265	-8.48825	1384.48	1.43856e-08	1.23467e-07	1.26489e-06	4.30218e-08	6.88771e-07	6.60621e-07	9.48548e-06	52712.2	0.52403	3.9444e-06	130527	14221.6
3487	36	55	9	1.52	1.12	5.7	11	76	0.1	silt loam	0.35	23	1.9264	1.27886	1.99526e-06	0.05534	0.000277119	0.440527	0.814691	1.08108	-6.58265	-8.48825	1384.48	1.43856e-08	1.23467e-07	1.26489e-06	4.30218e-08	6.88771e-07	6.60621e-07	9.48548e-06	52712.2	0.52403	3.9444e-06	130527	14221.6
3488	36	55	9	1.52	1.12	5.7	11	76	0.1	silt loam	0.35	23	1.9264	1.27886	1.99526e-06	0.05534	0.000277119	0.440527	0.814691	1.08108	-6.58265	-8.48825	1384.48	1.43856e-08	1.23467e-07	1.26489e-06	4.30218e-08	6.88771e-07	6.60621e-07	9.48548e-06	52712.2	0.52403	3.9444e-06	130527	14221.6
3494	46	43	11	1.51	4.38	5.9	24	57	0.1	loam	0.32	23	7.5336	1.67721	1.25893e-06	0.16146	2.26376e-12	0.325206	0.755161	1.0798	-6.43455	-9.21639	984.446	9.83242e-09	1.21386e-07	1.26403e-06	3.32872e-08	4.38553e-07	6.40308e-07	9.71909e-06	51445.1	0.522487	6.80871e-07	95784.2	1752.99
3496	42	36	22	1.4	1	6.6	16	93	0.1	loam	0.32	23	1.72	1.08994	2.51189e-07	0.13481	0.000188303	0.34105	0.764195	1.01357	-6.75863	-9.39913	2076.18	3.60088e-09	1.18537e-07	1.26284e-06	1.99644e-08	9.61045e-08	6.27828e-07	5.54833e-06	90117.2	0.448586	5.61577e-07	318187	7223.46
3518	73	18	9	1.59	1.4	7.5	12	75	0.1	sandy loam	0.2	13	2.408	1.04361	3.16228e-08	0.11474	6.78084e-11	0.356698	0.772814	0.797865	-6.96556	-10.6039	1889.82	2.24315e-09	1.17917e-07	1.26258e-06	1.70616e-08	2.1492e-08	6.18918e-07	2.31786e-06	215716	0.482972	3.16921e-08	296585	979.273
3519	73	18	9	1.59	1.4	7.5	12	75	0.1	sandy loam	0.2	13	2.408	1.04361	3.16228e-08	0.11474	6.78084e-11	0.356698	0.772814	0.797865	-6.96556	-10.6039	1889.82	2.24315e-09	1.17917e-07	1.26258e-06	1.70616e-08	2.1492e-08	6.18918e-07	2.31786e-06	215716	0.482972	3.16921e-08	296585	979.273
3532	26	27	47	1.25	1.22	6.3	18	77	0.1	clay (light)	0.2	24	2.0984	1.20398	5.01187e-07	0.11486	0.000189376	0.356593	0.772757	0.980478	-6.71257	-9.20279	1948.47	5.14678e-09	1.19244e-07	1.26313e-06	2.32695e-08	1.81058e-07	6.32214e-07	4.02187e-06	124320	0.398352	6.66708e-07	303494	10020.6
3537	89	7	4	1.74	0.4	5.9	3	70	0.1	sand	0.1	13	0.688	0.91844	1.25893e-06	0.00329476	1.73119e-06	0.777769	0.939102	0.845575	-6.88348	-8.48104	1564.37	9.83242e-09	1.21386e-07	1.26403e-06	3.32872e-08	4.38553e-07	6.40354e-07	1.26996e-06	393715	0.539053	1.72157e-06	256263	93632
3539	89	6	5	1.7	0.4	6.4	3	100	0.1	sand	0.1	13	0.688	0.83344	3.98107e-07	0.0081224	4.87455e-06	0.684976	0.909743	0.829003	-6.96058	-8.99446	1868.24	4.50937e-09	1.18953e-07	1.26301e-06	2.19067e-08	1.4603e-07	6.25437e-07	9.75955e-07	512319	0.518872	5.61272e-07	294016	43867.7
3541	89	6	5	1.7	0.4	6.4	3	100	0.1	sand	0.1	13	0.688	0.83344	3.98107e-07	0.0081224	4.87455e-06	0.684976	0.909743	0.829003	-6.96058	-8.99446	1868.24	4.50937e-09	1.18953e-07	1.26301e-06	2.19067e-08	1.4603e-07	6.25437e-07	9.75955e-07	512319	0.518872	5.61272e-07	120467	17973.8
3542	89	6	5	1.7	0.4	6.4	3	100	0.1	sand	0.1	13	0.688	0.83344	3.98107e-07	0.0081224	4.87455e-06	0.684976	0.909743	0.829003	-6.96058	-8.99446	1868.24	4.50937e-09	1.18953e-07	1.26301e-06	2.19067e-08	1.4603e-07	6.25437e-07	9.75955e-07	512319	0.518872	5.61272e-07	381437	56911
3557	83	11	6	1.67	0.5	6.6	5	94	0.1	loamy sand	0.17	13	0.86	0.870184	2.51189e-07	0.02764	2.14133e-05	0.530925	0.853608	0.817692	-6.96547	-9.28987	1889.41	3.60088e-09	1.18537e-07	1.26284e-06	1.99644e-08	9.61045e-08	6.23323e-07	1.89114e-06	264390	0.505532	5.04957e-07	296536	20013.6
3635	53	22	25	1.4	0.98	5.1	6	49	0.1	sandy clay loam	0.16	13	1.6856	1.33853	7.94328e-06	0.00980092	2.2481e-07	0.663032	0.902368	0.71843	-6.73686	-8.13038	1116.14	5.11662e-08	1.40279e-07	1.2719e-06	1.21657e-07	2.71002e-06	7.56808e-07	5.56239e-06	89889.5	0.402242	1.02864e-05	74955.5	27878.2
3636	78	12	10	1.58	0.61	6.2	4	72	0.1	sandy loam	0.2	13	1.0492	1.00123	6.30957e-07	0.01159	1.56676e-10	0.64279	0.8954	0.781742	-6.9077	-8.99585	1654.06	5.94924e-09	1.19611e-07	1.26329e-06	2.49851e-08	2.25157e-07	6.29363e-07	2.398e-06	208507	0.465371	1.34235e-06	107879	14051.5
3637	53	22	25	1.4	0.98	5.1	6	49	0.1	sandy clay loam	0.16	13	1.6856	1.33853	7.94328e-06	0.00980092	2.2481e-07	0.663032	0.902368	0.71843	-6.73686	-8.13038	1116.14	5.11662e-08	1.40279e-07	1.2719e-06	1.21657e-07	2.71002e-06	7.56808e-07	5.56239e-06	89889.5	0.402242	1.02864e-05	74955.5	27878.2
3638	46	30	24	1.39	1.73	5	9	27	0.1	loam	0.32	23	2.9756	1.53571	1e-05	0.02371	8.80148e-08	0.551181	0.861635	1.01259	-6.47371	-8.01179	1077.33	6.38843e-08	1.46092e-07	1.27433e-06	1.48848e-07	3.40893e-06	7.92649e-07	1.51438e-05	33016.8	0.447568	1.38309e-05	72504.4	14818.6
3639	46	30	24	1.39	1.73	5	9	27	0.1	loam	0.32	23	2.9756	1.53571	1e-05	0.02371	8.80148e-08	0.551181	0.861635	1.01259	-6.47371	-8.01179	1077.33	6.38843e-08	1.46092e-07	1.27433e-06	1.48848e-07	3.40893e-06	7.92649e-07	1.51438e-05	33016.8	0.447568	1.38309e-05	72504.4	14818.6
3640	46	30	24	1.39	1.73	5	9	27	0.1	loam	0.32	23	2.9756	1.53571	1e-05	0.02371	8.80148e-08	0.551181	0.861635	1.01259	-6.47371	-8.01179	1077.33	6.38843e-08	1.46092e-07	1.27433e-06	1.48848e-07	3.40893e-06	7.92649e-07	1.51438e-05	33016.8	0.447568	1.38309e-05	38669.9	7903.43
3641	46	30	24	1.39	1.73	5	9	27	0.1	loam	0.32	23	2.9756	1.53571	1e-05	0.02371	8.80148e-08	0.551181	0.861635	1.01259	-6.47371	-8.01179	1077.33	6.38843e-08	1.46092e-07	1.27433e-06	1.48848e-07	3.40893e-06	7.92649e-07	1.51438e-05	33016.8	0.447568	1.38309e-05	72504.4	14818.6
3642	49	27	24	1.4	1	4.6	7	44	0.1	sandy clay loam	0.16	13	1.72	1.42994	2.51189e-05	0.0091147	2.11533e-05	0.671608	0.905272	0.721664	-6.66517	-7.63557	946.295	1.57375e-07	1.88826e-07	1.29214e-06	3.48727e-07	8.5466e-06	1.05671e-06	1.06459e-05	46966.4	0.405248	3.19038e-05	64150.9	38954.1
3643	49	27	24	1.4	1	4.6	7	44	0.1	sandy clay loam	0.16	13	1.72	1.42994	2.51189e-05	0.0091147	2.11533e-05	0.671608	0.905272	0.721664	-6.66517	-7.63557	946.295	1.57375e-07	1.88826e-07	1.29214e-06	3.48727e-07	8.5466e-06	1.05671e-06	1.06459e-05	46966.4	0.405248	3.19038e-05	34098.9	20705.7
3644	49	27	24	1.4	1	4.6	7	44	0.1	sandy clay loam	0.16	13	1.72	1.42994	2.51189e-05	0.0091147	2.11533e-05	0.671608	0.905272	0.721664	-6.66517	-7.63557	946.295	1.57375e-07	1.88826e-07	1.29214e-06	3.48727e-07	8.5466e-06	1.05671e-06	1.06459e-05	46966.4	0.405248	3.19038e-05	64150.9	38954.1
3645	49	27	24	1.4	1	4.6	7	44	0.1	sandy clay loam	0.16	13	1.72	1.42994	2.51189e-05	0.0091147	2.11533e-05	0.671608	0.905272	0.721664	-6.66517	-7.63557	946.295	1.57375e-07	1.88826e-07	1.29214e-06	3.48727e-07	8.5466e-06	1.05671e-06	1.06459e-05	46966.4	0.405248	3.19038e-05	64150.9	38954.1
3646	49	27	24	1.4	1	4.6	7	44	0.1	sandy clay loam	0.16	13	1.72	1.42994	2.51189e-05	0.0091147	2.11533e-05	0.671608	0.905272	0.721664	-6.66517	-7.63557	946.295	1.57375e-07	1.88826e-07	1.29214e-06	3.48727e-07	8.5466e-06	1.05671e-06	1.06459e-05	46966.4	0.405248	3.19038e-05	64150.9	38954.1
3647	49	27	24	1.4	1	4.6	7	44	0.1	sandy clay loam	0.16	13	1.72	1.42994	2.51189e-05	0.0091147	2.11533e-05	0.671608	0.905272	0.721664	-6.66517	-7.63557	946.295	1.57375e-07	1.88826e-07	1.29214e-06	3.48727e-07	8.5466e-06	1.05671e-06	1.06459e-05	46966.4	0.405248	3.19038e-05	64150.9	38954.1
3648	49	27	24	1.4	1	4.6	7	44	0.1	sandy clay loam	0.16	13	1.72	1.42994	2.51189e-05	0.0091147	2.11533e-05	0.671608	0.905272	0.721664	-6.66517	-7.63557	946.295	1.57375e-07	1.88826e-07	1.29214e-06	3.48727e-07	8.5466e-06	1.05671e-06	1.06459e-05	46966.4	0.405248	3.19038e-05	64150.9	38954.1
3649	29	25	46	1.26	1.07	4.6	11	38	0.1	clay (light)	0.2	24	1.8404	1.45139	2.51189e-05	0.02757	8.3551e-05	0.531261	0.853743	0.980765	-6.50099	-7.45185	1197.06	1.57375e-07	1.88826e-07	1.29214e-06	3.48727e-07	8.5466e-06	1.05839e-06	1.68273e-05	29713.5	0.398615	3.72502e-05	80032.2	35310.3
3650	49	27	24	1.4	1	4.6	7	44	0.1	sandy clay loam	0.16	13	1.72	1.42994	2.51189e-05	0.0091147	2.11533e-05	0.671608	0.905272	0.721664	-6.66517	-7.63557	946.295	1.57375e-07	1.88826e-07	1.29214e-06	3.48727e-07	8.5466e-06	1.05671e-06	1.06459e-05	46966.4	0.405248	3.19038e-05	64150.9	38954.1
3651	49	27	24	1.4	1	4.6	7	44	0.1	sandy clay loam	0.16	13	1.72	1.42994	2.51189e-05	0.0091147	2.11533e-05	0.671608	0.905272	0.721664	-6.66517	-7.63557	946.295	1.57375e-07	1.88826e-07	1.29214e-06	3.48727e-07	8.5466e-06	1.05671e-06	1.06459e-05	46966.4	0.405248	3.19038e-05	64150.9	38954.1
3652	49	27	24	1.4	1	4.6	7	44	0.1	sandy clay loam	0.16	13	1.72	1.42994	2.51189e-05	0.0091147	2.11533e-05	0.671608	0.905272	0.721664	-6.66517	-7.63557	946.295	1.57375e-07	1.88826e-07	1.29214e-06	3.48727e-07	8.5466e-06	1.05671e-06	1.06459e-05	46966.4	0.405248	3.19038e-05	64150.9	38954.1
3653	49	27	24	1.4	1	4.6	7	44	0.1	sandy clay loam	0.16	13	1.72	1.42994	2.51189e-05	0.0091147	2.11533e-05	0.671608	0.905272	0.721664	-6.66517	-7.63557	946.295	1.57375e-07	1.88826e-07	1.29214e-06	3.48727e-07	8.5466e-06	1.05671e-06	1.06459e-05	46966.4	0.405248	3.19038e-05	34098.9	20705.7
3654	47	30	23	1.4	1.13	4.8	6	54	0.1	loam	0.32	23	1.9436	1.43468	1.58489e-05	0.00658977	4.9024e-07	0.708402	0.917424	1.01149	-6.50239	-7.64805	1150.87	1.00052e-07	1.62624e-07	1.28122e-06	2.26173e-07	5.39649e-06	8.94594e-07	1.52813e-05	32719.7	0.446442	3.18101e-05	77139.6	35844.1
3656	47	30	23	1.4	1.13	4.8	6	54	0.1	loam	0.32	23	1.9436	1.43468	1.58489e-05	0.00658977	4.9024e-07	0.708402	0.917424	1.01149	-6.50239	-7.64805	1150.87	1.00052e-07	1.62624e-07	1.28122e-06	2.26173e-07	5.39649e-06	8.94594e-07	1.52813e-05	32719.7	0.446442	3.18101e-05	77139.6	35844.1
3661	22	31	47	1.25	1.72	5	17	28	0.1	clay (light)	0.2	24	2.9584	1.53387	1e-05	0.06564	7.19697e-06	0.41941	0.804748	0.983909	-6.49166	-8.03278	1171.62	6.38843e-08	1.46092e-07	1.27433e-06	1.48848e-07	3.40893e-06	7.92841e-07	1.24391e-05	40196	0.401511	9.78416e-06	78440.9	12386.4
3662	41	39	20	1.41	1.45	5.1	12	37	0.1	loam	0.32	23	2.494	1.46273	7.94328e-06	0.04062	7.41018e-06	0.480209	0.832449	1.02436	-6.50282	-8.03401	1152.03	5.11662e-08	1.40279e-07	1.2719e-06	1.21657e-07	2.71002e-06	7.57002e-07	1.53608e-05	32550.4	0.45987	1.26081e-05	77212.6	14572.4
3663	41	39	20	1.41	1.45	5.1	12	37	0.1	loam	0.32	23	2.494	1.46273	7.94328e-06	0.04062	7.41018e-06	0.480209	0.832449	1.02436	-6.50282	-8.03401	1152.03	5.11662e-08	1.40279e-07	1.2719e-06	1.21657e-07	2.71002e-06	7.57002e-07	1.53608e-05	32550.4	0.45987	1.26081e-05	77158	14562.1
3664	75	15	10	1.58	0.7	5.2	5	22	0.1	sandy loam	0.2	13	1.204	1.21486	6.30957e-06	0.00666149	3.77644e-07	0.707217	0.91704	0.783117	-6.75484	-8.04793	1163.31	4.10639e-08	1.35661e-07	1.26998e-06	1.00059e-07	2.15485e-06	7.2834e-07	5.78343e-06	86453.8	0.466846	1.18689e-05	77864.9	37300.1
3665	41	39	20	1.41	1.45	5.1	12	37	0.1	loam	0.32	23	2.494	1.46273	7.94328e-06	0.04062	7.41018e-06	0.480209	0.832449	1.02436	-6.50282	-8.03401	1152.03	5.11662e-08	1.40279e-07	1.2719e-06	1.21657e-07	2.71002e-06	7.57002e-07	1.53608e-05	32550.4	0.45987	1.26081e-05	77212.6	14572.4
3666	42	36	22	1.4	1	6.6	16	93	0.1	loam	0.32	23	1.72	1.08994	2.51189e-07	0.13481	0.000188303	0.34105	0.764195	1.01357	-6.75863	-9.39913	2076.18	3.60088e-09	1.18537e-07	1.26284e-06	1.99644e-08	9.61045e-08	6.27828e-07	5.54833e-06	90117.2	0.448586	5.61577e-07	132418	3006.15
3667	42	36	22	1.4	1	6.6	16	93	0.1	loam	0.32	23	1.72	1.08994	2.51189e-07	0.13481	0.000188303	0.34105	0.764195	1.01357	-6.75863	-9.39913	2076.18	3.60088e-09	1.18537e-07	1.26284e-06	1.99644e-08	9.61045e-08	6.27828e-07	5.54833e-06	90117.2	0.448586	5.61577e-07	132418	3006.15
3668	42	36	22	1.4	1	6.6	16	93	0.1	loam	0.32	23	1.72	1.08994	2.51189e-07	0.13481	0.000188303	0.34105	0.764195	1.01357	-6.75863	-9.39913	2076.18	3.60088e-09	1.18537e-07	1.26284e-06	1.99644e-08	9.61045e-08	6.27828e-07	5.54833e-06	90117.2	0.448586	5.61577e-07	132418	3006.15
3669	42	36	22	1.4	1	6.6	16	93	0.1	loam	0.32	23	1.72	1.08994	2.51189e-07	0.13481	0.000188303	0.34105	0.764195	1.01357	-6.75863	-9.39913	2076.18	3.60088e-09	1.18537e-07	1.26284e-06	1.99644e-08	9.61045e-08	6.27828e-07	5.54833e-06	90117.2	0.448586	5.61577e-07	132418	3006.15
3670	42	36	22	1.4	1	6.6	16	93	0.1	loam	0.32	23	1.72	1.08994	2.51189e-07	0.13481	0.000188303	0.34105	0.764195	1.01357	-6.75863	-9.39913	2076.18	3.60088e-09	1.18537e-07	1.26284e-06	1.99644e-08	9.61045e-08	6.27828e-07	5.54833e-06	90117.2	0.448586	5.61577e-07	132418	3006.15
3671	42	36	22	1.4	1	6.6	16	93	0.1	loam	0.32	23	1.72	1.08994	2.51189e-07	0.13481	0.000188303	0.34105	0.764195	1.01357	-6.75863	-9.39913	2076.18	3.60088e-09	1.18537e-07	1.26284e-06	1.99644e-08	9.61045e-08	6.27828e-07	5.54833e-06	90117.2	0.448586	5.61577e-07	132418	3006.15
3673	42	36	22	1.4	1	6.6	16	93	0.1	loam	0.32	23	1.72	1.08994	2.51189e-07	0.13481	0.000188303	0.34105	0.764195	1.01357	-6.75863	-9.39913	2076.18	3.60088e-09	1.18537e-07	1.26284e-06	1.99644e-08	9.61045e-08	6.27828e-07	5.54833e-06	90117.2	0.448586	5.61577e-07	409606	9298.84
3674	42	36	22	1.4	1	6.6	16	93	0.1	loam	0.32	23	1.72	1.08994	2.51189e-07	0.13481	0.000188303	0.34105	0.764195	1.01357	-6.75863	-9.39913	2076.18	3.60088e-09	1.18537e-07	1.26284e-06	1.99644e-08	9.61045e-08	6.27828e-07	5.54833e-06	90117.2	0.448586	5.61577e-07	132418	3006.15
3675	42	36	22	1.4	1	6.6	16	93	0.1	loam	0.32	23	1.72	1.08994	2.51189e-07	0.13481	0.000188303	0.34105	0.764195	1.01357	-6.75863	-9.39913	2076.18	3.60088e-09	1.18537e-07	1.26284e-06	1.99644e-08	9.61045e-08	6.27828e-07	5.54833e-06	90117.2	0.448586	5.61577e-07	132418	3006.15
3676	42	36	22	1.4	1	6.6	16	93	0.1	loam	0.32	23	1.72	1.08994	2.51189e-07	0.13481	0.000188303	0.34105	0.764195	1.01357	-6.75863	-9.39913	2076.18	3.60088e-09	1.18537e-07	1.26284e-06	1.99644e-08	9.61045e-08	6.27828e-07	5.54833e-06	90117.2	0.448586	5.61577e-07	132418	3006.15
3677	42	36	22	1.4	1	6.6	16	93	0.1	loam	0.32	23	1.72	1.08994	2.51189e-07	0.13481	0.000188303	0.34105	0.764195	1.01357	-6.75863	-9.39913	2076.18	3.60088e-09	1.18537e-07	1.26284e-06	1.99644e-08	9.61045e-08	6.27828e-07	5.54833e-06	90117.2	0.448586	5.61577e-07	132418	3006.15
3678	42	36	22	1.4	1	6.6	16	93	0.1	loam	0.32	23	1.72	1.08994	2.51189e-07	0.13481	0.000188303	0.34105	0.764195	1.01357	-6.75863	-9.39913	2076.18	3.60088e-09	1.18537e-07	1.26284e-06	1.99644e-08	9.61045e-08	6.27828e-07	5.54833e-06	90117.2	0.448586	5.61577e-07	132418	3006.15
3679	42	36	22	1.4	1	6.6	16	93	0.1	loam	0.32	23	1.72	1.08994	2.51189e-07	0.13481	0.000188303	0.34105	0.764195	1.01357	-6.75863	-9.39913	2076.18	3.60088e-09	1.18537e-07	1.26284e-06	1.99644e-08	9.61045e-08	6.27828e-07	5.54833e-06	90117.2	0.448586	5.61577e-07	132321	3003.93
3680	42	36	22	1.4	1	6.6	16	93	0.1	loam	0.32	23	1.72	1.08994	2.51189e-07	0.13481	0.000188303	0.34105	0.764195	1.01357	-6.75863	-9.39913	2076.18	3.60088e-09	1.18537e-07	1.26284e-06	1.99644e-08	9.61045e-08	6.27828e-07	5.54833e-06	90117.2	0.448586	5.61577e-07	132418	3006.15
3681	42	36	22	1.4	1	6.6	16	93	0.1	loam	0.32	23	1.72	1.08994	2.51189e-07	0.13481	0.000188303	0.34105	0.764195	1.01357	-6.75863	-9.39913	2076.18	3.60088e-09	1.18537e-07	1.26284e-06	1.99644e-08	9.61045e-08	6.27828e-07	5.54833e-06	90117.2	0.448586	5.61577e-07	132418	3006.15
3682	42	36	22	1.4	1	6.6	16	93	0.1	loam	0.32	23	1.72	1.08994	2.51189e-07	0.13481	0.000188303	0.34105	0.764195	1.01357	-6.75863	-9.39913	2076.18	3.60088e-09	1.18537e-07	1.26284e-06	1.99644e-08	9.61045e-08	6.27828e-07	5.54833e-06	90117.2	0.448586	5.61577e-07	132418	3006.15
3683	42	36	22	1.4	1	6.6	16	93	0.1	loam	0.32	23	1.72	1.08994	2.51189e-07	0.13481	0.000188303	0.34105	0.764195	1.01357	-6.75863	-9.39913	2076.18	3.60088e-09	1.18537e-07	1.26284e-06	1.99644e-08	9.61045e-08	6.27828e-07	5.54833e-06	90117.2	0.448586	5.61577e-07	132418	3006.15
3684	42	36	22	1.4	1	6.6	16	93	0.1	loam	0.32	23	1.72	1.08994	2.51189e-07	0.13481	0.000188303	0.34105	0.764195	1.01357	-6.75863	-9.39913	2076.18	3.60088e-09	1.18537e-07	1.26284e-06	1.99644e-08	9.61045e-08	6.27828e-07	5.54833e-06	90117.2	0.448586	5.61577e-07	132418	3006.15
3685	42	36	22	1.4	1	6.6	16	93	0.1	loam	0.32	23	1.72	1.08994	2.51189e-07	0.13481	0.000188303	0.34105	0.764195	1.01357	-6.75863	-9.39913	2076.18	3.60088e-09	1.18537e-07	1.26284e-06	1.99644e-08	9.61045e-08	6.27828e-07	5.54833e-06	90117.2	0.448586	5.61577e-07	132418	3006.15
3686	42	36	22	1.4	1	6.6	16	93	0.1	loam	0.32	23	1.72	1.08994	2.51189e-07	0.13481	0.000188303	0.34105	0.764195	1.01357	-6.75863	-9.39913	2076.18	3.60088e-09	1.18537e-07	1.26284e-06	1.99644e-08	9.61045e-08	6.27828e-07	5.54833e-06	90117.2	0.448586	5.61577e-07	132418	3006.15
3687	26	24	50	1.25	1.15	4.9	10	58	0.1	clay (light)	0.2	24	1.978	1.42325	1.25893e-05	0.02679	1.69087e-05	0.535056	0.855263	0.975293	-6.53528	-7.78416	1295.38	7.98957e-08	1.53411e-07	1.27738e-06	1.8308e-07	4.28882e-06	8.38229e-07	1.10805e-05	45124.3	0.393624	1.76913e-05	86140.6	27068.2
3689	52	25	23	1.41	0.95	4.7	6	39	0.1	sandy clay loam	0.16	13	1.634	1.39667	1.99526e-05	0.00613307	2.9035e-06	0.716192	0.919936	0.724312	-6.68362	-7.7136	987.363	1.25428e-07	1.74223e-07	1.28605e-06	2.80426e-07	6.791e-06	9.66178e-07	8.6651e-06	57702.8	0.407726	2.63072e-05	66782	41333.2
3690	52	25	23	1.41	0.95	4.7	6	39	0.1	sandy clay loam	0.16	13	1.634	1.39667	1.99526e-05	0.00613307	2.9035e-06	0.716192	0.919936	0.724312	-6.68362	-7.7136	987.363	1.25428e-07	1.74223e-07	1.28605e-06	2.80426e-07	6.791e-06	9.66178e-07	8.6651e-06	57702.8	0.407726	2.63072e-05	66782	41333.2
3691	41	36	23	1.39	2.72	5.2	21	24	0.1	loam	0.32	23	4.6784	1.64517	6.30957e-06	0.10286	1.93617e-06	0.368018	0.778874	1.02027	-6.43765	-8.38047	991.499	4.10639e-08	1.35661e-07	1.26998e-06	1.00059e-07	2.15485e-06	7.28382e-07	1.77825e-05	28117.5	0.455554	5.81413e-06	67046.3	4993.16
3692	41	36	23	1.39	2.72	5.2	21	24	0.1	loam	0.32	23	4.6784	1.64517	6.30957e-06	0.10286	1.93617e-06	0.368018	0.778874	1.02027	-6.43765	-8.38047	991.499	4.10639e-08	1.35661e-07	1.26998e-06	1.00059e-07	2.15485e-06	7.28382e-07	1.77825e-05	28117.5	0.455554	5.81413e-06	67046.3	4993.16
3699	62	12	26	1.41	0.68	5.4	5	75	0.1	sandy clay loam	0.16	13	1.1696	1.17167	3.98107e-06	0.00848936	3.83237e-07	0.679888	0.908049	0.711867	-6.82818	-8.29444	1377.33	2.66652e-08	1.2908e-07	1.26723e-06	6.92751e-08	1.36359e-06	6.87759e-07	3.83263e-06	130459	0.396209	7.10689e-06	91182.1	33495.4
3700	22	19	59	1.21	1.42	5.4	10	61	0.1	clay(heavy)	0.2	24	2.4424	1.40511	3.98107e-06	0.03369	5.30651e-09	0.504765	0.842893	0.965107	-6.58136	-8.37392	1440.4	2.66652e-08	1.2908e-07	1.26723e-06	6.92751e-08	1.36359e-06	6.87749e-07	6.45289e-06	77484.6	0.3845	4.81176e-06	95031.6	13623.3
3701	40	39	21	1.4	1.25	5.1	11	47	0.1	loam	0.32	23	2.15	1.41568	7.94328e-06	0.03492	2.48837e-05	0.500038	0.840913	1.01926	-6.52501	-7.98077	1212.42	5.11662e-08	1.40279e-07	1.2719e-06	1.21657e-07	2.71002e-06	7.57474e-07	1.47532e-05	33891	0.454495	1.45238e-05	80990.6	18118.7
3702	40	39	21	1.4	1.25	5.1	11	47	0.1	loam	0.32	23	2.15	1.41568	7.94328e-06	0.03492	2.48837e-05	0.500038	0.840913	1.01926	-6.52501	-7.98077	1212.42	5.11662e-08	1.40279e-07	1.2719e-06	1.21657e-07	2.71002e-06	7.57474e-07	1.47532e-05	33891	0.454495	1.45238e-05	80990.6	18118.7
3703	78	13	9	1.6	0.56	6.3	6	74	0.1	sandy loam	0.2	13	0.9632	0.957113	5.01187e-07	0.0288	2.62541e-05	0.525488	0.851414	0.788713	-6.92796	-9.05715	1733.08	5.14678e-09	1.19244e-07	1.26313e-06	2.32695e-08	1.81058e-07	6.2781e-07	2.72604e-06	183417	0.4729	1.13275e-06	112557	11059
3704	37	40	23	1.38	1.07	6.2	13	88	0.1	loam	0.32	23	1.8404	1.17939	6.30957e-07	0.08447	0.000241459	0.389683	0.790092	1.01095	-6.69776	-9.02741	1804.69	5.94924e-09	1.19611e-07	1.26329e-06	2.49851e-08	2.25157e-07	6.35881e-07	6.33976e-06	78867.4	0.445882	1.34898e-06	63414.2	3008.22
3705	37	40	23	1.38	1.07	6.2	13	88	0.1	loam	0.32	23	1.8404	1.17939	6.30957e-07	0.08447	0.000241459	0.389683	0.790092	1.01095	-6.69776	-9.02741	1804.69	5.94924e-09	1.19611e-07	1.26329e-06	2.49851e-08	2.25157e-07	6.35881e-07	6.33976e-06	78867.4	0.445882	1.34898e-06	116762	5538.9
3706	37	40	23	1.38	1.07	6.2	13	88	0.1	loam	0.32	23	1.8404	1.17939	6.30957e-07	0.08447	0.000241459	0.389683	0.790092	1.01095	-6.69776	-9.02741	1804.69	5.94924e-09	1.19611e-07	1.26329e-06	2.49851e-08	2.25157e-07	6.35881e-07	6.33976e-06	78867.4	0.445882	1.34898e-06	116762	5538.9
3707	37	40	23	1.38	1.07	6.2	13	88	0.1	loam	0.32	23	1.8404	1.17939	6.30957e-07	0.08447	0.000241459	0.389683	0.790092	1.01095	-6.69776	-9.02741	1804.69	5.94924e-09	1.19611e-07	1.26329e-06	2.49851e-08	2.25157e-07	6.35881e-07	6.33976e-06	78867.4	0.445882	1.34898e-06	116762	5538.9
3708	17	31	52	1.22	1.25	5.8	26	78	0.1	clay (light)	0.2	24	2.15	1.29668	1.58489e-06	0.20066	0.00110869	0.308815	0.74546	0.973213	-6.64665	-8.71807	1674.06	1.1848e-08	1.22307e-07	1.26441e-06	3.75965e-08	5.4932e-07	6.75915e-07	7.06419e-06	70779.6	0.391743	2.12069e-06	109067	6413.26
3710	33	45	22	1.38	3.71	5.5	18	34	0.1	loam	0.32	23	6.3812	1.69258	3.16228e-06	0.09054	4.62285e-12	0.381878	0.786106	1.02667	-6.43411	-8.79526	983.433	2.16021e-08	1.26766e-07	1.26627e-06	5.84503e-08	1.08535e-06	6.73479e-07	1.22489e-05	40819.9	0.462318	2.22038e-06	35398	1483.27
3711	39	38	23	1.38	1.83	6.4	18	87	0.1	loam	0.32	23	3.1476	1.31553	3.98107e-07	0.12189	9.85744e-05	0.350677	0.769532	1.01631	-6.65226	-9.43049	1625.16	4.50937e-09	1.18953e-07	1.26301e-06	2.19067e-08	1.4603e-07	6.27966e-07	6.10435e-06	81908.8	0.45142	5.26693e-07	106158	2067.39
3747	49	32	19	1.43	1.1	5	7	36	0.1	loam	0.32	23	1.892	1.39215	1e-05	0.01271	9.51976e-07	0.631412	0.891412	1.02541	-6.52436	-7.82638	1210.6	6.38843e-08	1.46092e-07	1.27433e-06	1.48848e-07	3.40893e-06	7.92672e-07	1.32196e-05	37822.7	0.460983	2.00038e-05	43282.7	15096.1
3748	49	32	19	1.43	1.1	5	7	36	0.1	loam	0.32	23	1.892	1.39215	1e-05	0.01271	9.51976e-07	0.631412	0.891412	1.02541	-6.52436	-7.82638	1210.6	6.38843e-08	1.46092e-07	1.27433e-06	1.48848e-07	3.40893e-06	7.92672e-07	1.32196e-05	37822.7	0.460983	2.00038e-05	80877.3	28208.2
3749	49	32	19	1.43	1.1	5	7	36	0.1	loam	0.32	23	1.892	1.39215	1e-05	0.01271	9.51976e-07	0.631412	0.891412	1.02541	-6.52436	-7.82638	1210.6	6.38843e-08	1.46092e-07	1.27433e-06	1.48848e-07	3.40893e-06	7.92672e-07	1.32196e-05	37822.7	0.460983	2.00038e-05	43282.7	15096.1
3761	81	11	8	1.62	0.58	6.7	6	88	0.1	loamy sand	0.17	13	0.9976	0.900238	1.99526e-07	0.03669	1.59918e-05	0.493534	0.838165	0.79781	-6.9717	-9.46335	1916.72	3.28141e-09	1.18391e-07	1.26278e-06	1.92814e-08	7.85485e-08	6.22276e-07	1.92478e-06	259770	0.482911	3.65482e-07	123277	5652.01
3762	8	34	58	1.19	2.59	5	27	80	0.1	clay (light)	0.2	24	4.4548	1.66364	1e-05	0.16654	0.000752775	0.32268	0.75369	0.97238	-6.44584	-8.20033	1054.29	6.38843e-08	1.46092e-07	1.27433e-06	1.48848e-07	3.40893e-06	8.12966e-07	1.62356e-05	30796.4	0.390993	7.17564e-06	71044.1	6138.44
3763	8	34	58	1.19	2.59	5	27	80	0.1	clay (light)	0.2	24	4.4548	1.66364	1e-05	0.16654	0.000752775	0.32268	0.75369	0.97238	-6.44584	-8.20033	1054.29	6.38843e-08	1.46092e-07	1.27433e-06	1.48848e-07	3.40893e-06	8.12966e-07	1.62356e-05	30796.4	0.390993	7.17564e-06	37868.5	3271.97
3764	30	41	29	1.33	3	4.5	18	93	0.1	clay loam	0.18	23	5.16	1.79523	3.16228e-05	0.09297	0.000920172	0.378946	0.784593	1.00403	-6.34076	-7.73149	793.229	1.97593e-07	2.07209e-07	1.2998e-06	4.34711e-07	1.07567e-05	1.19433e-06	2.46581e-05	20277.3	0.438837	1.58119e-05	54237.4	7631.26
3765	30	41	29	1.33	3	4.5	18	93	0.1	clay loam	0.18	23	5.16	1.79523	3.16228e-05	0.09297	0.000920172	0.378946	0.784593	1.00403	-6.34076	-7.73149	793.229	1.97593e-07	2.07209e-07	1.2998e-06	4.34711e-07	1.07567e-05	1.19433e-06	2.46581e-05	20277.3	0.438837	1.58119e-05	54237.4	7631.26
3766	47	29	24	1.39	0.86	6.4	12	89	0.1	loam	0.32	23	1.4792	1.07612	3.98107e-07	0.08436	0.000181828	0.389831	0.790167	1.0056	-6.75598	-9.14729	2063.58	4.50937e-09	1.18953e-07	1.26301e-06	2.19067e-08	1.4603e-07	6.30213e-07	5.49451e-06	90999.9	0.44043	1.0288e-06	71972.5	2967.69
3768	47	29	24	1.39	0.86	6.4	12	89	0.1	loam	0.32	23	1.4792	1.07612	3.98107e-07	0.08436	0.000181828	0.389831	0.790167	1.0056	-6.75598	-9.14729	2063.58	4.50937e-09	1.18953e-07	1.26301e-06	2.19067e-08	1.4603e-07	6.30213e-07	5.49451e-06	90999.9	0.44043	1.0288e-06	131701	5430.51
3770	47	29	24	1.39	0.86	6.4	12	89	0.1	loam	0.32	23	1.4792	1.07612	3.98107e-07	0.08436	0.000181828	0.389831	0.790167	1.0056	-6.75598	-9.14729	2063.58	4.50937e-09	1.18953e-07	1.26301e-06	2.19067e-08	1.4603e-07	6.30213e-07	5.49451e-06	90999.9	0.44043	1.0288e-06	131701	5430.51
3771	47	29	24	1.39	0.86	6.4	12	89	0.1	loam	0.32	23	1.4792	1.07612	3.98107e-07	0.08436	0.000181828	0.389831	0.790167	1.0056	-6.75598	-9.14729	2063.58	4.50937e-09	1.18953e-07	1.26301e-06	2.19067e-08	1.4603e-07	6.30213e-07	5.49451e-06	90999.9	0.44043	1.0288e-06	131701	5430.51
3773	47	29	24	1.39	0.86	6.4	12	89	0.1	loam	0.32	23	1.4792	1.07612	3.98107e-07	0.08436	0.000181828	0.389831	0.790167	1.0056	-6.75598	-9.14729	2063.58	4.50937e-09	1.18953e-07	1.26301e-06	2.19067e-08	1.4603e-07	6.30213e-07	5.49451e-06	90999.9	0.44043	1.0288e-06	131701	5430.51
3775	47	29	24	1.39	0.86	6.4	12	89	0.1	loam	0.32	23	1.4792	1.07612	3.98107e-07	0.08436	0.000181828	0.389831	0.790167	1.0056	-6.75598	-9.14729	2063.58	4.50937e-09	1.18953e-07	1.26301e-06	2.19067e-08	1.4603e-07	6.30213e-07	5.49451e-06	90999.9	0.44043	1.0288e-06	131701	5430.51
3778	47	29	24	1.39	0.86	6.4	12	89	0.1	loam	0.32	23	1.4792	1.07612	3.98107e-07	0.08436	0.000181828	0.389831	0.790167	1.0056	-6.75598	-9.14729	2063.58	4.50937e-09	1.18953e-07	1.26301e-06	2.19067e-08	1.4603e-07	6.30213e-07	5.49451e-06	90999.9	0.44043	1.0288e-06	131701	5430.51
3779	47	29	24	1.39	0.86	6.4	12	89	0.1	loam	0.32	23	1.4792	1.07612	3.98107e-07	0.08436	0.000181828	0.389831	0.790167	1.0056	-6.75598	-9.14729	2063.58	4.50937e-09	1.18953e-07	1.26301e-06	2.19067e-08	1.4603e-07	6.30213e-07	5.49451e-06	90999.9	0.44043	1.0288e-06	131701	5430.51
3781	47	29	24	1.39	0.86	6.4	12	89	0.1	loam	0.32	23	1.4792	1.07612	3.98107e-07	0.08436	0.000181828	0.389831	0.790167	1.0056	-6.75598	-9.14729	2063.58	4.50937e-09	1.18953e-07	1.26301e-06	2.19067e-08	1.4603e-07	6.30213e-07	5.49451e-06	90999.9	0.44043	1.0288e-06	131701	5430.51
3782	47	29	24	1.39	0.86	6.4	12	89	0.1	loam	0.32	23	1.4792	1.07612	3.98107e-07	0.08436	0.000181828	0.389831	0.790167	1.0056	-6.75598	-9.14729	2063.58	4.50937e-09	1.18953e-07	1.26301e-06	2.19067e-08	1.4603e-07	6.30213e-07	5.49451e-06	90999.9	0.44043	1.0288e-06	131701	5430.51
3784	26	27	47	1.25	1.22	6.3	18	77	0.1	clay (light)	0.2	24	2.0984	1.20398	5.01187e-07	0.11486	0.000189376	0.356593	0.772757	0.980478	-6.71257	-9.20279	1948.47	5.14678e-09	1.19244e-07	1.26313e-06	2.32695e-08	1.81058e-07	6.32214e-07	4.02187e-06	124320	0.398352	6.66708e-07	68182.9	2251.23
3785	79	11	10	1.59	0.53	6.3	4	76	0.1	sandy loam	0.2	13	0.9116	0.939657	5.01187e-07	0.01286	7.86541e-09	0.629954	0.890896	0.780338	-6.94008	-9.04265	1782.13	5.14678e-09	1.19244e-07	1.26313e-06	2.32695e-08	1.81058e-07	6.27102e-07	2.27355e-06	219921	0.463869	1.20152e-06	115440	14149.8
3786	56	20	24	1.41	0.74	6.3	7	85	0.1	sandy clay loam	0.16	13	1.2728	1.04547	5.01187e-07	0.03195	3.25636e-06	0.511765	0.8458	0.718656	-6.93409	-9.22163	1757.68	5.14678e-09	1.19244e-07	1.26313e-06	2.32695e-08	1.81058e-07	6.2719e-07	2.23894e-06	223320	0.402451	8.27383e-07	114005	8477.56
3788	79	11	10	1.59	0.53	6.3	4	76	0.1	sandy loam	0.2	13	0.9116	0.939657	5.01187e-07	0.01286	7.86541e-09	0.629954	0.890896	0.780338	-6.94008	-9.04265	1782.13	5.14678e-09	1.19244e-07	1.26313e-06	2.32695e-08	1.81058e-07	6.27102e-07	2.27355e-06	219921	0.463869	1.20152e-06	115440	14149.8
3789	56	20	24	1.41	0.74	6.3	7	85	0.1	sandy clay loam	0.16	13	1.2728	1.04547	5.01187e-07	0.03195	3.25636e-06	0.511765	0.8458	0.718656	-6.93409	-9.22163	1757.68	5.14678e-09	1.19244e-07	1.26313e-06	2.32695e-08	1.81058e-07	6.2719e-07	2.23894e-06	223320	0.402451	8.27383e-07	61846.4	4598.98
3790	56	20	24	1.41	0.74	6.3	7	85	0.1	sandy clay loam	0.16	13	1.2728	1.04547	5.01187e-07	0.03195	3.25636e-06	0.511765	0.8458	0.718656	-6.93409	-9.22163	1757.68	5.14678e-09	1.19244e-07	1.26313e-06	2.32695e-08	1.81058e-07	6.2719e-07	2.23894e-06	223320	0.402451	8.27383e-07	61846.4	4598.98
3791	79	11	10	1.59	0.53	6.3	4	76	0.1	sandy loam	0.2	13	0.9116	0.939657	5.01187e-07	0.01286	7.86541e-09	0.629954	0.890896	0.780338	-6.94008	-9.04265	1782.13	5.14678e-09	1.19244e-07	1.26313e-06	2.32695e-08	1.81058e-07	6.27102e-07	2.27355e-06	219921	0.463869	1.20152e-06	115440	14149.8
3792	79	11	10	1.59	0.53	6.3	4	76	0.1	sandy loam	0.2	13	0.9116	0.939657	5.01187e-07	0.01286	7.86541e-09	0.629954	0.890896	0.780338	-6.94008	-9.04265	1782.13	5.14678e-09	1.19244e-07	1.26313e-06	2.32695e-08	1.81058e-07	6.27102e-07	2.27355e-06	219921	0.463869	1.20152e-06	115440	14149.8
3794	56	20	24	1.41	0.74	6.3	7	85	0.1	sandy clay loam	0.16	13	1.2728	1.04547	5.01187e-07	0.03195	3.25636e-06	0.511765	0.8458	0.718656	-6.93409	-9.22163	1757.68	5.14678e-09	1.19244e-07	1.26313e-06	2.32695e-08	1.81058e-07	6.2719e-07	2.23894e-06	223320	0.402451	8.27383e-07	114005	8477.56
3795	79	11	10	1.59	0.53	6.3	4	76	0.1	sandy loam	0.2	13	0.9116	0.939657	5.01187e-07	0.01286	7.86541e-09	0.629954	0.890896	0.780338	-6.94008	-9.04265	1782.13	5.14678e-09	1.19244e-07	1.26313e-06	2.32695e-08	1.81058e-07	6.27102e-07	2.27355e-06	219921	0.463869	1.20152e-06	115440	14149.8
3797	47	32	21	1.41	0.82	6.2	11	88	0.1	loam	0.32	23	1.4104	1.09502	6.30957e-07	0.07371	0.000260118	0.405498	0.797989	1.01505	-6.72959	-8.92123	1941.93	5.94924e-09	1.19611e-07	1.26329e-06	2.49851e-08	2.25157e-07	6.36385e-07	6.0933e-06	82057.3	0.450109	1.67011e-06	124732	7694.09
3798	47	32	21	1.41	0.82	6.2	11	88	0.1	loam	0.32	23	1.4104	1.09502	6.30957e-07	0.07371	0.000260118	0.405498	0.797989	1.01505	-6.72959	-8.92123	1941.93	5.94924e-09	1.19611e-07	1.26329e-06	2.49851e-08	2.25157e-07	6.36385e-07	6.0933e-06	82057.3	0.450109	1.67011e-06	124732	7694.09
3799	81	9	10	1.59	0.57	6.2	5	89	0.1	loamy sand	0.17	13	0.9804	0.979724	6.30957e-07	0.02018	2.74129e-05	0.572341	0.869789	0.781065	-6.91684	-8.97019	1689.27	5.94924e-09	1.19611e-07	1.26329e-06	2.49851e-08	2.25157e-07	6.30103e-07	2.28964e-06	218375	0.464645	1.20472e-06	109968	13442.4
3800	81	9	10	1.59	0.57	6.2	5	89	0.1	loamy sand	0.17	13	0.9804	0.979724	6.30957e-07	0.02018	2.74129e-05	0.572341	0.869789	0.781065	-6.91684	-8.97019	1689.27	5.94924e-09	1.19611e-07	1.26329e-06	2.49851e-08	2.25157e-07	6.30103e-07	2.28964e-06	218375	0.464645	1.20472e-06	109968	13442.4
3801	81	9	10	1.59	0.57	6.2	5	89	0.1	loamy sand	0.17	13	0.9804	0.979724	6.30957e-07	0.02018	2.74129e-05	0.572341	0.869789	0.781065	-6.91684	-8.97019	1689.27	5.94924e-09	1.19611e-07	1.26329e-06	2.49851e-08	2.25157e-07	6.30103e-07	2.28964e-06	218375	0.464645	1.20472e-06	109968	13442.4
3802	81	9	10	1.59	0.57	6.2	5	89	0.1	loamy sand	0.17	13	0.9804	0.979724	6.30957e-07	0.02018	2.74129e-05	0.572341	0.869789	0.781065	-6.91684	-8.97019	1689.27	5.94924e-09	1.19611e-07	1.26329e-06	2.49851e-08	2.25157e-07	6.30103e-07	2.28964e-06	218375	0.464645	1.20472e-06	109968	13442.4
3803	47	32	21	1.41	0.82	6.2	11	88	0.1	loam	0.32	23	1.4104	1.09502	6.30957e-07	0.07371	0.000260118	0.405498	0.797989	1.01505	-6.72959	-8.92123	1941.93	5.94924e-09	1.19611e-07	1.26329e-06	2.49851e-08	2.25157e-07	6.36385e-07	6.0933e-06	82057.3	0.450109	1.67011e-06	124732	7694.09
3804	47	32	21	1.41	0.82	6.2	11	88	0.1	loam	0.32	23	1.4104	1.09502	6.30957e-07	0.07371	0.000260118	0.405498	0.797989	1.01505	-6.72959	-8.92123	1941.93	5.94924e-09	1.19611e-07	1.26329e-06	2.49851e-08	2.25157e-07	6.36385e-07	6.0933e-06	82057.3	0.450109	1.67011e-06	124732	7694.09
3805	81	9	10	1.59	0.57	6.2	5	89	0.1	loamy sand	0.17	13	0.9804	0.979724	6.30957e-07	0.02018	2.74129e-05	0.572341	0.869789	0.781065	-6.91684	-8.97019	1689.27	5.94924e-09	1.19611e-07	1.26329e-06	2.49851e-08	2.25157e-07	6.30103e-07	2.28964e-06	218375	0.464645	1.20472e-06	109968	13442.4
3806	81	9	10	1.59	0.57	6.2	5	89	0.1	loamy sand	0.17	13	0.9804	0.979724	6.30957e-07	0.02018	2.74129e-05	0.572341	0.869789	0.781065	-6.91684	-8.97019	1689.27	5.94924e-09	1.19611e-07	1.26329e-06	2.49851e-08	2.25157e-07	6.30103e-07	2.28964e-06	218375	0.464645	1.20472e-06	109968	13442.4
3807	81	9	10	1.59	0.57	6.2	5	89	0.1	loamy sand	0.17	13	0.9804	0.979724	6.30957e-07	0.02018	2.74129e-05	0.572341	0.869789	0.781065	-6.91684	-8.97019	1689.27	5.94924e-09	1.19611e-07	1.26329e-06	2.49851e-08	2.25157e-07	6.30103e-07	2.28964e-06	218375	0.464645	1.20472e-06	109968	13442.4
3808	47	32	21	1.41	0.82	6.2	11	88	0.1	loam	0.32	23	1.4104	1.09502	6.30957e-07	0.07371	0.000260118	0.405498	0.797989	1.01505	-6.72959	-8.92123	1941.93	5.94924e-09	1.19611e-07	1.26329e-06	2.49851e-08	2.25157e-07	6.36385e-07	6.0933e-06	82057.3	0.450109	1.67011e-06	124732	7694.09
3809	47	32	21	1.41	0.82	6.2	11	88	0.1	loam	0.32	23	1.4104	1.09502	6.30957e-07	0.07371	0.000260118	0.405498	0.797989	1.01505	-6.72959	-8.92123	1941.93	5.94924e-09	1.19611e-07	1.26329e-06	2.49851e-08	2.25157e-07	6.36385e-07	6.0933e-06	82057.3	0.450109	1.67011e-06	124732	7694.09
3810	47	32	21	1.41	0.82	6.2	11	88	0.1	loam	0.32	23	1.4104	1.09502	6.30957e-07	0.07371	0.000260118	0.405498	0.797989	1.01505	-6.72959	-8.92123	1941.93	5.94924e-09	1.19611e-07	1.26329e-06	2.49851e-08	2.25157e-07	6.36385e-07	6.0933e-06	82057.3	0.450109	1.67011e-06	124732	7694.09
3811	47	32	21	1.41	0.82	6.2	11	88	0.1	loam	0.32	23	1.4104	1.09502	6.30957e-07	0.07371	0.000260118	0.405498	0.797989	1.01505	-6.72959	-8.92123	1941.93	5.94924e-09	1.19611e-07	1.26329e-06	2.49851e-08	2.25157e-07	6.36385e-07	6.0933e-06	82057.3	0.450109	1.67011e-06	124732	7694.09
3812	47	32	21	1.41	0.82	6.2	11	88	0.1	loam	0.32	23	1.4104	1.09502	6.30957e-07	0.07371	0.000260118	0.405498	0.797989	1.01505	-6.72959	-8.92123	1941.93	5.94924e-09	1.19611e-07	1.26329e-06	2.49851e-08	2.25157e-07	6.36385e-07	6.0933e-06	82057.3	0.450109	1.67011e-06	124732	7694.09
3814	44	33	23	1.39	0.99	4.9	9	51	0.1	loam	0.32	23	1.7028	1.37575	1.25893e-05	0.02294	0.000113525	0.555529	0.86333	1.01017	-6.53365	-7.698	1236.78	7.98957e-08	1.53411e-07	1.27738e-06	1.8308e-07	4.28882e-06	8.40837e-07	1.70843e-05	29266.7	0.445086	2.86453e-05	82507.6	30786.8
3815	44	33	23	1.39	0.99	4.9	9	51	0.1	loam	0.32	23	1.7028	1.37575	1.25893e-05	0.02294	0.000113525	0.555529	0.86333	1.01017	-6.53365	-7.698	1236.78	7.98957e-08	1.53411e-07	1.27738e-06	1.8308e-07	4.28882e-06	8.40837e-07	1.70843e-05	29266.7	0.445086	2.86453e-05	82507.6	30786.8
3816	44	33	23	1.39	0.99	4.9	9	51	0.1	loam	0.32	23	1.7028	1.37575	1.25893e-05	0.02294	0.000113525	0.555529	0.86333	1.01017	-6.53365	-7.698	1236.78	7.98957e-08	1.53411e-07	1.27738e-06	1.8308e-07	4.28882e-06	8.40837e-07	1.70843e-05	29266.7	0.445086	2.86453e-05	82507.6	30786.8
3817	44	33	23	1.39	0.99	4.9	9	51	0.1	loam	0.32	23	1.7028	1.37575	1.25893e-05	0.02294	0.000113525	0.555529	0.86333	1.01017	-6.53365	-7.698	1236.78	7.98957e-08	1.53411e-07	1.27738e-06	1.8308e-07	4.28882e-06	8.40837e-07	1.70843e-05	29266.7	0.445086	2.86453e-05	82507.6	30786.8
3818	44	33	23	1.39	0.99	4.9	9	51	0.1	loam	0.32	23	1.7028	1.37575	1.25893e-05	0.02294	0.000113525	0.555529	0.86333	1.01017	-6.53365	-7.698	1236.78	7.98957e-08	1.53411e-07	1.27738e-06	1.8308e-07	4.28882e-06	8.40837e-07	1.70843e-05	29266.7	0.445086	2.86453e-05	82507.6	30786.8
3819	44	33	23	1.39	0.99	4.9	9	51	0.1	loam	0.32	23	1.7028	1.37575	1.25893e-05	0.02294	0.000113525	0.555529	0.86333	1.01017	-6.53365	-7.698	1236.78	7.98957e-08	1.53411e-07	1.27738e-06	1.8308e-07	4.28882e-06	8.40837e-07	1.70843e-05	29266.7	0.445086	2.86453e-05	82507.6	30786.8
3820	44	33	23	1.39	0.99	4.9	9	51	0.1	loam	0.32	23	1.7028	1.37575	1.25893e-05	0.02294	0.000113525	0.555529	0.86333	1.01017	-6.53365	-7.698	1236.78	7.98957e-08	1.53411e-07	1.27738e-06	1.8308e-07	4.28882e-06	8.40837e-07	1.70843e-05	29266.7	0.445086	2.86453e-05	82507.6	30786.8
3821	22	23	55	1.22	1.32	5.6	14	61	0.1	clay (light)	0.2	24	2.2704	1.34795	2.51189e-06	0.06067	2.35108e-06	0.429065	0.809339	0.969592	-6.61494	-8.54206	1556.19	1.75803e-08	1.24927e-07	1.2655e-06	4.98519e-08	8.64331e-07	6.62208e-07	6.13968e-06	81437.4	0.388491	3.20703e-06	102031	10352.4
3823	44	33	23	1.39	0.99	4.9	9	51	0.1	loam	0.32	23	1.7028	1.37575	1.25893e-05	0.02294	0.000113525	0.555529	0.86333	1.01017	-6.53365	-7.698	1236.78	7.98957e-08	1.53411e-07	1.27738e-06	1.8308e-07	4.28882e-06	8.40837e-07	1.70843e-05	29266.7	0.445086	2.86453e-05	44184.5	16487
3824	49	28	23	1.4	0.58	6.2	9	81	0.1	loam	0.32	23	0.9976	0.985238	6.30957e-07	0.05378	0.000187204	0.444128	0.816351	1.00483	-6.78034	-8.79566	2182.64	5.94924e-09	1.19611e-07	1.26329e-06	2.49851e-08	2.25157e-07	6.34417e-07	5.56044e-06	89920.9	0.439646	2.29943e-06	138437	12584.5
3825	49	28	23	1.4	0.58	6.2	9	81	0.1	loam	0.32	23	0.9976	0.985238	6.30957e-07	0.05378	0.000187204	0.444128	0.816351	1.00483	-6.78034	-8.79566	2182.64	5.94924e-09	1.19611e-07	1.26329e-06	2.49851e-08	2.25157e-07	6.34417e-07	5.56044e-06	89920.9	0.439646	2.29943e-06	138437	12584.5
3826	49	28	23	1.4	0.58	6.2	9	81	0.1	loam	0.32	23	0.9976	0.985238	6.30957e-07	0.05378	0.000187204	0.444128	0.816351	1.00483	-6.78034	-8.79566	2182.64	5.94924e-09	1.19611e-07	1.26329e-06	2.49851e-08	2.25157e-07	6.34417e-07	5.56044e-06	89920.9	0.439646	2.29943e-06	138437	12584.5
3827	49	28	23	1.4	0.58	6.2	9	81	0.1	loam	0.32	23	0.9976	0.985238	6.30957e-07	0.05378	0.000187204	0.444128	0.816351	1.00483	-6.78034	-8.79566	2182.64	5.94924e-09	1.19611e-07	1.26329e-06	2.49851e-08	2.25157e-07	6.34417e-07	5.56044e-06	89920.9	0.439646	2.29943e-06	138437	12584.5
3829	49	28	23	1.4	0.58	6.2	9	81	0.1	loam	0.32	23	0.9976	0.985238	6.30957e-07	0.05378	0.000187204	0.444128	0.816351	1.00483	-6.78034	-8.79566	2182.64	5.94924e-09	1.19611e-07	1.26329e-06	2.49851e-08	2.25157e-07	6.34417e-07	5.56044e-06	89920.9	0.439646	2.29943e-06	138437	12584.5
3830	81	7	12	1.56	0.53	6.3	6	73	0.1	sandy loam	0.2	13	0.9116	0.939657	5.01187e-07	0.02897	2.57854e-05	0.524709	0.851098	0.766798	-6.94821	-9.05362	1815.78	5.14678e-09	1.19244e-07	1.26313e-06	2.32695e-08	1.81058e-07	6.27798e-07	2.73007e-06	183145	0.44963	1.2319e-06	117410	11910.5
3833	49	28	23	1.4	0.58	6.2	9	81	0.1	loam	0.32	23	0.9976	0.985238	6.30957e-07	0.05378	0.000187204	0.444128	0.816351	1.00483	-6.78034	-8.79566	2182.64	5.94924e-09	1.19611e-07	1.26329e-06	2.49851e-08	2.25157e-07	6.34417e-07	5.56044e-06	89920.9	0.439646	2.29943e-06	138437	12584.5
3834	49	28	23	1.4	0.58	6.2	9	81	0.1	loam	0.32	23	0.9976	0.985238	6.30957e-07	0.05378	0.000187204	0.444128	0.816351	1.00483	-6.78034	-8.79566	2182.64	5.94924e-09	1.19611e-07	1.26329e-06	2.49851e-08	2.25157e-07	6.34417e-07	5.56044e-06	89920.9	0.439646	2.29943e-06	138437	12584.5
3836	26	33	41	1.27	30.73	4.4	77	58	0.1	clay (light)	0.2	16	52.8556	2.54986	3.98107e-05	0.43119	2.13795e-11	0.283892	0.729942	0.819991	-6.13796	-8.67986	345.929	2.48224e-07	2.30352e-07	1.30945e-06	5.42959e-07	1.35391e-05	1.31219e-06	4.24045e-05	11791.2	0.412925	3.16566e-06	24267.6	374.041
3837	89	7	4	1.74	0.4	5.9	3	70	0.1	sand	0.1	13	0.688	0.91844	1.25893e-06	0.00329476	1.73119e-06	0.777769	0.939102	0.845575	-6.88348	-8.48104	1564.37	9.83242e-09	1.21386e-07	1.26403e-06	3.32872e-08	4.38553e-07	6.40354e-07	1.26996e-06	393715	0.539053	1.72157e-06	102522	37458.8
3839	89	6	5	1.7	0.4	6.4	3	100	0.1	sand	0.1	13	0.688	0.83344	3.98107e-07	0.0081224	4.87455e-06	0.684976	0.909743	0.829003	-6.96058	-8.99446	1868.24	4.50937e-09	1.18953e-07	1.26301e-06	2.19067e-08	1.4603e-07	6.25437e-07	9.75955e-07	512319	0.518872	5.61272e-07	120467	17973.8
3840	89	6	5	1.7	0.4	6.4	3	100	0.1	sand	0.1	13	0.688	0.83344	3.98107e-07	0.0081224	4.87455e-06	0.684976	0.909743	0.829003	-6.96058	-8.99446	1868.24	4.50937e-09	1.18953e-07	1.26301e-06	2.19067e-08	1.4603e-07	6.25437e-07	9.75955e-07	512319	0.518872	5.61272e-07	120467	17973.8
3841	89	6	5	1.7	0.4	6.4	3	100	0.1	sand	0.1	13	0.688	0.83344	3.98107e-07	0.0081224	4.87455e-06	0.684976	0.909743	0.829003	-6.96058	-8.99446	1868.24	4.50937e-09	1.18953e-07	1.26301e-06	2.19067e-08	1.4603e-07	6.25437e-07	9.75955e-07	512319	0.518872	5.61272e-07	120467	17973.8
3844	82	10	8	1.62	0.7	5.4	4	38	0.1	loamy sand	0.17	13	1.204	1.18086	3.98107e-06	0.00423306	7.38789e-08	0.754212	0.931909	0.799689	-6.77176	-8.23451	1209.51	2.66652e-08	1.2908e-07	1.26723e-06	6.92751e-08	1.36359e-06	6.87751e-07	3.67087e-06	136208	0.485004	6.16343e-06	80809.6	32902.7
3845	82	10	8	1.62	0.7	5.4	4	38	0.1	loamy sand	0.17	13	1.204	1.18086	3.98107e-06	0.00423306	7.38789e-08	0.754212	0.931909	0.799689	-6.77176	-8.23451	1209.51	2.66652e-08	1.2908e-07	1.26723e-06	6.92751e-08	1.36359e-06	6.87751e-07	3.67087e-06	136208	0.485004	6.16343e-06	80809.6	32902.7
3846	82	10	8	1.62	0.7	5.4	4	38	0.1	loamy sand	0.17	13	1.204	1.18086	3.98107e-06	0.00423306	7.38789e-08	0.754212	0.931909	0.799689	-6.77176	-8.23451	1209.51	2.66652e-08	1.2908e-07	1.26723e-06	6.92751e-08	1.36359e-06	6.87751e-07	3.67087e-06	136208	0.485004	6.16343e-06	80809.6	32902.7
3847	82	10	8	1.62	0.7	5.4	4	38	0.1	loamy sand	0.17	13	1.204	1.18086	3.98107e-06	0.00423306	7.38789e-08	0.754212	0.931909	0.799689	-6.77176	-8.23451	1209.51	2.66652e-08	1.2908e-07	1.26723e-06	6.92751e-08	1.36359e-06	6.87751e-07	3.67087e-06	136208	0.485004	6.16343e-06	80809.6	32902.7
3848	82	10	8	1.62	0.7	5.4	4	38	0.1	loamy sand	0.17	13	1.204	1.18086	3.98107e-06	0.00423306	7.38789e-08	0.754212	0.931909	0.799689	-6.77176	-8.23451	1209.51	2.66652e-08	1.2908e-07	1.26723e-06	6.92751e-08	1.36359e-06	6.87751e-07	3.67087e-06	136208	0.485004	6.16343e-06	80809.6	32902.7
3849	82	10	8	1.62	0.7	5.4	4	38	0.1	loamy sand	0.17	13	1.204	1.18086	3.98107e-06	0.00423306	7.38789e-08	0.754212	0.931909	0.799689	-6.77176	-8.23451	1209.51	2.66652e-08	1.2908e-07	1.26723e-06	6.92751e-08	1.36359e-06	6.87751e-07	3.67087e-06	136208	0.485004	6.16343e-06	80809.6	32902.7
3850	82	10	8	1.62	0.7	5.4	4	38	0.1	loamy sand	0.17	13	1.204	1.18086	3.98107e-06	0.00423306	7.38789e-08	0.754212	0.931909	0.799689	-6.77176	-8.23451	1209.51	2.66652e-08	1.2908e-07	1.26723e-06	6.92751e-08	1.36359e-06	6.87751e-07	3.67087e-06	136208	0.485004	6.16343e-06	80809.6	32902.7
3851	42	37	21	1.4	1.37	5.1	11	22	0.1	loam	0.32	23	2.3564	1.44474	7.94328e-06	0.03455	2.07637e-06	0.501442	0.841502	1.02017	-6.51265	-8.01546	1178.39	5.11662e-08	1.40279e-07	1.2719e-06	1.21657e-07	2.71002e-06	7.56858e-07	1.47099e-05	33990.7	0.455454	1.33806e-05	78865.2	16336.7
3852	82	10	8	1.62	0.7	5.4	4	38	0.1	loamy sand	0.17	13	1.204	1.18086	3.98107e-06	0.00423306	7.38789e-08	0.754212	0.931909	0.799689	-6.77176	-8.23451	1209.51	2.66652e-08	1.2908e-07	1.26723e-06	6.92751e-08	1.36359e-06	6.87751e-07	3.67087e-06	136208	0.485004	6.16343e-06	80809.6	32902.7
3853	47	34	19	1.43	0.97	6.4	12	79	0.1	loam	0.32	23	1.6684	1.11428	3.98107e-07	0.07639	9.23319e-05	0.401294	0.795913	1.02416	-6.72934	-9.17878	1940.8	4.50937e-09	1.18953e-07	1.26301e-06	2.19067e-08	1.4603e-07	6.27798e-07	5.33415e-06	93735.7	0.459651	8.91177e-07	124667	4786.83
3854	47	34	19	1.43	0.97	6.4	12	79	0.1	loam	0.32	23	1.6684	1.11428	3.98107e-07	0.07639	9.23319e-05	0.401294	0.795913	1.02416	-6.72934	-9.17878	1940.8	4.50937e-09	1.18953e-07	1.26301e-06	2.19067e-08	1.4603e-07	6.27798e-07	5.33415e-06	93735.7	0.459651	8.91177e-07	124667	4786.83
3855	83	11	6	1.67	0.5	6.6	5	94	0.1	loamy sand	0.17	13	0.86	0.870184	2.51189e-07	0.02764	2.14133e-05	0.530925	0.853608	0.817692	-6.96547	-9.28987	1889.41	3.60088e-09	1.18537e-07	1.26284e-06	1.99644e-08	9.61045e-08	6.23323e-07	1.89114e-06	264390	0.505532	5.04957e-07	121695	8213.39
3856	34	48	18	1.41	7.37	5.4	35	13	0.1	loam	0.32	23	12.6764	1.92719	3.98107e-06	0.21588	1.75905e-12	0.304049	0.742567	1.04843	-6.31918	-8.94294	754.771	2.66652e-08	1.2908e-07	1.26723e-06	6.92751e-08	1.36359e-06	6.87749e-07	1.71404e-05	29170.9	0.486071	1.47113e-06	27353.6	570.578
4026	25	35	40	1.27	38.37	5.9	88	100	0.1	clay (light)	0.2	16	65.9964	2.36525	1.25893e-06	0.63303	2.97887e-15	0.303026	0.741942	0.824043	-6.30836	-10.2624	512.148	9.83242e-09	1.21386e-07	1.26403e-06	3.32872e-08	4.38553e-07	6.40308e-07	6.51905e-06	76698.3	0.416795	8.2011e-08	18694.2	49.0103
4035	82	10	8	1.62	0.7	5.4	4	38	0.1	loamy sand	0.17	13	1.204	1.18086	3.98107e-06	0.00423306	7.38789e-08	0.754212	0.931909	0.799689	-6.77176	-8.23451	1209.51	2.66652e-08	1.2908e-07	1.26723e-06	6.92751e-08	1.36359e-06	6.87751e-07	3.67087e-06	136208	0.485004	6.16343e-06	77790.5	31673.5
4036	47	34	19	1.43	0.97	6.4	12	79	0.1	loam	0.32	23	1.6684	1.11428	3.98107e-07	0.07639	9.23319e-05	0.401294	0.795913	1.02416	-6.72934	-9.17878	1940.8	4.50937e-09	1.18953e-07	1.26301e-06	2.19067e-08	1.4603e-07	6.27798e-07	5.33415e-06	93735.7	0.459651	8.91177e-07	391487	15031.9
4234	42	36	22	1.4	0.94	6.1	14	89	0.1	loam	0.32	23	1.6168	1.15532	7.94328e-07	0.10864	0.00048526	0.362288	0.775825	1.01296	-6.69982	-8.87571	1813.26	6.95947e-09	1.20073e-07	1.26348e-06	2.71449e-08	2.80673e-07	6.45309e-07	7.38569e-06	67698.5	0.447948	1.87691e-06	117177	6669.49
4255	53	22	25	1.4	0.98	5.1	6	49	0.1	sandy clay loam	0.16	13	1.6856	1.33853	7.94328e-06	0.00980092	2.2481e-07	0.663032	0.902368	0.71843	-6.73686	-8.13038	1116.14	5.11662e-08	1.40279e-07	1.2719e-06	1.21657e-07	2.71002e-06	7.56808e-07	5.56239e-06	89889.5	0.402242	1.02864e-05	74955.5	27878.2
4258	30	22	48	1.26	1.23	4.9	9	29	0.1	clay (light)	0.2	24	2.1156	1.44457	1.25893e-05	0.0217	8.41124e-07	0.562832	0.866153	0.978996	-6.52439	-7.80715	1263.31	7.98957e-08	1.53411e-07	1.27738e-06	1.8308e-07	4.28882e-06	8.37796e-07	1.05328e-05	47471	0.396995	1.65045e-05	84095.5	26156.9
4260	78	12	10	1.58	0.61	6.2	4	72	0.1	sandy loam	0.2	13	1.0492	1.00123	6.30957e-07	0.01159	1.56676e-10	0.64279	0.8954	0.781742	-6.9077	-8.99585	1654.06	5.94924e-09	1.19611e-07	1.26329e-06	2.49851e-08	2.25157e-07	6.29363e-07	2.398e-06	208507	0.465371	1.34235e-06	58375.6	7603.54
4261	78	12	10	1.58	0.61	6.2	4	72	0.1	sandy loam	0.2	13	1.0492	1.00123	6.30957e-07	0.01159	1.56676e-10	0.64279	0.8954	0.781742	-6.9077	-8.99585	1654.06	5.94924e-09	1.19611e-07	1.26329e-06	2.49851e-08	2.25157e-07	6.29363e-07	2.398e-06	208507	0.465371	1.34235e-06	58375.6	7603.54
4263	30	22	48	1.26	1.23	4.9	9	29	0.1	clay (light)	0.2	24	2.1156	1.44457	1.25893e-05	0.0217	8.41124e-07	0.562832	0.866153	0.978996	-6.52439	-7.80715	1263.31	7.98957e-08	1.53411e-07	1.27738e-06	1.8308e-07	4.28882e-06	8.37796e-07	1.05328e-05	47471	0.396995	1.65045e-05	84095.5	26156.9
4264	34	43	23	1.38	0.83	4.9	7	30	0.1	loam	0.32	23	1.4276	1.31986	1.25893e-05	0.00981081	3.54799e-06	0.662912	0.902327	1.00841	-6.55742	-7.63129	1306.36	7.98957e-08	1.53411e-07	1.27738e-06	1.8308e-07	4.28882e-06	8.37869e-07	1.43084e-05	34944.5	0.443285	3.378e-05	46574.9	24371.1
4265	76	14	10	1.58	0.72	5.4	5	64	0.1	sandy loam	0.2	13	1.2384	1.18979	3.98107e-06	0.00887586	2.49959e-06	0.674715	0.906317	0.783399	-6.7779	-8.25859	1226.75	2.66652e-08	1.2908e-07	1.26723e-06	6.92751e-08	1.36359e-06	6.87817e-07	4.82759e-06	103571	0.467149	7.30244e-06	43839.2	15489.1
4267	49	27	24	1.4	1	4.6	7	44	0.1	sandy clay loam	0.16	13	1.72	1.42994	2.51189e-05	0.0091147	2.11533e-05	0.671608	0.905272	0.721664	-6.66517	-7.63557	946.295	1.57375e-07	1.88826e-07	1.29214e-06	3.48727e-07	8.5466e-06	1.05671e-06	1.06459e-05	46966.4	0.405248	3.19038e-05	64106	38926.8
4272	49	27	24	1.4	1	4.6	7	44	0.1	sandy clay loam	0.16	13	1.72	1.42994	2.51189e-05	0.0091147	2.11533e-05	0.671608	0.905272	0.721664	-6.66517	-7.63557	946.295	1.57375e-07	1.88826e-07	1.29214e-06	3.48727e-07	8.5466e-06	1.05671e-06	1.06459e-05	46966.4	0.405248	3.19038e-05	34092.6	20701.9
4276	49	27	24	1.4	1	4.6	7	44	0.1	sandy clay loam	0.16	13	1.72	1.42994	2.51189e-05	0.0091147	2.11533e-05	0.671608	0.905272	0.721664	-6.66517	-7.63557	946.295	1.57375e-07	1.88826e-07	1.29214e-06	3.48727e-07	8.5466e-06	1.05671e-06	1.06459e-05	46966.4	0.405248	3.19038e-05	64106	38926.8
4277	49	27	24	1.4	1	4.6	7	44	0.1	sandy clay loam	0.16	13	1.72	1.42994	2.51189e-05	0.0091147	2.11533e-05	0.671608	0.905272	0.721664	-6.66517	-7.63557	946.295	1.57375e-07	1.88826e-07	1.29214e-06	3.48727e-07	8.5466e-06	1.05671e-06	1.06459e-05	46966.4	0.405248	3.19038e-05	34092.6	20701.9
4278	49	27	24	1.4	1	4.6	7	44	0.1	sandy clay loam	0.16	13	1.72	1.42994	2.51189e-05	0.0091147	2.11533e-05	0.671608	0.905272	0.721664	-6.66517	-7.63557	946.295	1.57375e-07	1.88826e-07	1.29214e-06	3.48727e-07	8.5466e-06	1.05671e-06	1.06459e-05	46966.4	0.405248	3.19038e-05	34092.6	20701.9
4279	29	25	46	1.26	1.07	4.6	11	38	0.1	clay (light)	0.2	24	1.8404	1.45139	2.51189e-05	0.02757	8.3551e-05	0.531261	0.853743	0.980765	-6.50099	-7.45185	1197.06	1.57375e-07	1.88826e-07	1.29214e-06	3.48727e-07	8.5466e-06	1.05839e-06	1.68273e-05	29713.5	0.398615	3.72502e-05	42807.8	18886.9
4280	29	25	46	1.26	1.07	4.6	11	38	0.1	clay (light)	0.2	24	1.8404	1.45139	2.51189e-05	0.02757	8.3551e-05	0.531261	0.853743	0.980765	-6.50099	-7.45185	1197.06	1.57375e-07	1.88826e-07	1.29214e-06	3.48727e-07	8.5466e-06	1.05839e-06	1.68273e-05	29713.5	0.398615	3.72502e-05	42807.8	18886.9
4281	29	25	46	1.26	1.07	4.6	11	38	0.1	clay (light)	0.2	24	1.8404	1.45139	2.51189e-05	0.02757	8.3551e-05	0.531261	0.853743	0.980765	-6.50099	-7.45185	1197.06	1.57375e-07	1.88826e-07	1.29214e-06	3.48727e-07	8.5466e-06	1.05839e-06	1.68273e-05	29713.5	0.398615	3.72502e-05	42807.8	18886.9
4282	49	27	24	1.4	1	4.6	7	44	0.1	sandy clay loam	0.16	13	1.72	1.42994	2.51189e-05	0.0091147	2.11533e-05	0.671608	0.905272	0.721664	-6.66517	-7.63557	946.295	1.57375e-07	1.88826e-07	1.29214e-06	3.48727e-07	8.5466e-06	1.05671e-06	1.06459e-05	46966.4	0.405248	3.19038e-05	34098.9	20705.7
4284	49	27	24	1.4	1	4.6	7	44	0.1	sandy clay loam	0.16	13	1.72	1.42994	2.51189e-05	0.0091147	2.11533e-05	0.671608	0.905272	0.721664	-6.66517	-7.63557	946.295	1.57375e-07	1.88826e-07	1.29214e-06	3.48727e-07	8.5466e-06	1.05671e-06	1.06459e-05	46966.4	0.405248	3.19038e-05	64106	38926.8
4289	41	39	20	1.41	1.45	5.1	12	37	0.1	loam	0.32	23	2.494	1.46273	7.94328e-06	0.04062	7.41018e-06	0.480209	0.832449	1.02436	-6.50282	-8.03401	1152.03	5.11662e-08	1.40279e-07	1.2719e-06	1.21657e-07	2.71002e-06	7.57002e-07	1.53608e-05	32550.4	0.45987	1.26081e-05	41252.3	7785.57
4290	41	39	20	1.41	1.45	5.1	12	37	0.1	loam	0.32	23	2.494	1.46273	7.94328e-06	0.04062	7.41018e-06	0.480209	0.832449	1.02436	-6.50282	-8.03401	1152.03	5.11662e-08	1.40279e-07	1.2719e-06	1.21657e-07	2.71002e-06	7.57002e-07	1.53608e-05	32550.4	0.45987	1.26081e-05	41252.3	7785.57
4292	41	39	20	1.41	1.45	5.1	12	37	0.1	loam	0.32	23	2.494	1.46273	7.94328e-06	0.04062	7.41018e-06	0.480209	0.832449	1.02436	-6.50282	-8.03401	1152.03	5.11662e-08	1.40279e-07	1.2719e-06	1.21657e-07	2.71002e-06	7.57002e-07	1.53608e-05	32550.4	0.45987	1.26081e-05	41252.3	7785.57
4293	41	39	20	1.41	1.45	5.1	12	37	0.1	loam	0.32	23	2.494	1.46273	7.94328e-06	0.04062	7.41018e-06	0.480209	0.832449	1.02436	-6.50282	-8.03401	1152.03	5.11662e-08	1.40279e-07	1.2719e-06	1.21657e-07	2.71002e-06	7.57002e-07	1.53608e-05	32550.4	0.45987	1.26081e-05	41252.3	7785.57
4294	42	36	22	1.4	1	6.6	16	93	0.1	loam	0.32	23	1.72	1.08994	2.51189e-07	0.13481	0.000188303	0.34105	0.764195	1.01357	-6.75863	-9.39913	2076.18	3.60088e-09	1.18537e-07	1.26284e-06	1.99644e-08	9.61045e-08	6.27828e-07	5.54833e-06	90117.2	0.448586	5.61577e-07	72372.4	1642.99
4295	42	36	22	1.4	1	6.6	16	93	0.1	loam	0.32	23	1.72	1.08994	2.51189e-07	0.13481	0.000188303	0.34105	0.764195	1.01357	-6.75863	-9.39913	2076.18	3.60088e-09	1.18537e-07	1.26284e-06	1.99644e-08	9.61045e-08	6.27828e-07	5.54833e-06	90117.2	0.448586	5.61577e-07	72372.4	1642.99
4296	42	36	22	1.4	1	6.6	16	93	0.1	loam	0.32	23	1.72	1.08994	2.51189e-07	0.13481	0.000188303	0.34105	0.764195	1.01357	-6.75863	-9.39913	2076.18	3.60088e-09	1.18537e-07	1.26284e-06	1.99644e-08	9.61045e-08	6.27828e-07	5.54833e-06	90117.2	0.448586	5.61577e-07	72372.4	1642.99
4297	42	36	22	1.4	1	6.6	16	93	0.1	loam	0.32	23	1.72	1.08994	2.51189e-07	0.13481	0.000188303	0.34105	0.764195	1.01357	-6.75863	-9.39913	2076.18	3.60088e-09	1.18537e-07	1.26284e-06	1.99644e-08	9.61045e-08	6.27828e-07	5.54833e-06	90117.2	0.448586	5.61577e-07	72372.4	1642.99
4298	42	36	22	1.4	1	6.6	16	93	0.1	loam	0.32	23	1.72	1.08994	2.51189e-07	0.13481	0.000188303	0.34105	0.764195	1.01357	-6.75863	-9.39913	2076.18	3.60088e-09	1.18537e-07	1.26284e-06	1.99644e-08	9.61045e-08	6.27828e-07	5.54833e-06	90117.2	0.448586	5.61577e-07	132321	3003.93
4299	42	36	22	1.4	1	6.6	16	93	0.1	loam	0.32	23	1.72	1.08994	2.51189e-07	0.13481	0.000188303	0.34105	0.764195	1.01357	-6.75863	-9.39913	2076.18	3.60088e-09	1.18537e-07	1.26284e-06	1.99644e-08	9.61045e-08	6.27828e-07	5.54833e-06	90117.2	0.448586	5.61577e-07	72372.4	1642.99
4300	52	25	23	1.41	0.95	4.7	6	39	0.1	sandy clay loam	0.16	13	1.634	1.39667	1.99526e-05	0.00613307	2.9035e-06	0.716192	0.919936	0.724312	-6.68362	-7.7136	987.363	1.25428e-07	1.74223e-07	1.28605e-06	2.80426e-07	6.791e-06	9.66178e-07	8.6651e-06	57702.8	0.407726	2.63072e-05	35528.8	21989.7
4301	41	36	23	1.39	2.72	5.2	21	24	0.1	loam	0.32	23	4.6784	1.64517	6.30957e-06	0.10286	1.93617e-06	0.368018	0.778874	1.02027	-6.43765	-8.38047	991.499	4.10639e-08	1.35661e-07	1.26998e-06	1.00059e-07	2.15485e-06	7.28382e-07	1.77825e-05	28117.5	0.455554	5.81413e-06	67046.3	4993.16
4318	31	54	15	1.43	1.59	5	19	55	0.1	silt loam	0.35	23	2.7348	1.50896	1e-05	0.10607	0.000816197	0.364781	0.777156	1.04665	-6.46415	-7.95158	1053.87	6.38843e-08	1.46092e-07	1.27433e-06	1.48848e-07	3.40893e-06	8.14678e-07	2.51419e-05	19887.1	0.484084	1.56168e-05	37847.1	5690.04
4322	37	40	23	1.38	1.07	6.2	13	88	0.1	loam	0.32	23	1.8404	1.17939	6.30957e-07	0.08447	0.000241459	0.389683	0.790092	1.01095	-6.69776	-9.02741	1804.69	5.94924e-09	1.19611e-07	1.26329e-06	2.49851e-08	2.25157e-07	6.35881e-07	6.33976e-06	78867.4	0.445882	1.34898e-06	63402.4	3007.66
4323	37	40	23	1.38	1.07	6.2	13	88	0.1	loam	0.32	23	1.8404	1.17939	6.30957e-07	0.08447	0.000241459	0.389683	0.790092	1.01095	-6.69776	-9.02741	1804.69	5.94924e-09	1.19611e-07	1.26329e-06	2.49851e-08	2.25157e-07	6.35881e-07	6.33976e-06	78867.4	0.445882	1.34898e-06	63402.4	3007.66
4324	17	31	52	1.22	1.25	5.8	26	78	0.1	clay (light)	0.2	24	2.15	1.29668	1.58489e-06	0.20066	0.00110869	0.308815	0.74546	0.973213	-6.64665	-8.71807	1674.06	1.1848e-08	1.22307e-07	1.26441e-06	3.75965e-08	5.4932e-07	6.75915e-07	7.06419e-06	70779.6	0.391743	2.12069e-06	59047.2	3472.04
4325	17	31	52	1.22	1.25	5.8	26	78	0.1	clay (light)	0.2	24	2.15	1.29668	1.58489e-06	0.20066	0.00110869	0.308815	0.74546	0.973213	-6.64665	-8.71807	1674.06	1.1848e-08	1.22307e-07	1.26441e-06	3.75965e-08	5.4932e-07	6.75915e-07	7.06419e-06	70779.6	0.391743	2.12069e-06	59047.2	3472.04
4331	33	45	22	1.38	3.71	5.5	18	34	0.1	loam	0.32	23	6.3812	1.69258	3.16228e-06	0.09054	4.62285e-12	0.381878	0.786106	1.02667	-6.43411	-8.79526	983.433	2.16021e-08	1.26766e-07	1.26627e-06	5.84503e-08	1.08535e-06	6.73479e-07	1.22489e-05	40819.9	0.462318	2.22038e-06	66530.7	2787.81
4332	33	45	22	1.38	3.71	5.5	18	34	0.1	loam	0.32	23	6.3812	1.69258	3.16228e-06	0.09054	4.62285e-12	0.381878	0.786106	1.02667	-6.43411	-8.79526	983.433	2.16021e-08	1.26766e-07	1.26627e-06	5.84503e-08	1.08535e-06	6.73479e-07	1.22489e-05	40819.9	0.462318	2.22038e-06	35398	1483.27
4335	38	40	22	1.39	1.74	6.5	17	87	0.1	loam	0.32	23	2.9928	1.28254	3.16228e-07	0.11605	5.97311e-05	0.355554	0.772194	1.01911	-6.67051	-9.50873	1694.9	4.00306e-09	1.18721e-07	1.26292e-06	2.08242e-08	1.18206e-07	6.25491e-07	5.64443e-06	88582.9	0.454337	4.33893e-07	110222	1924.77
4396	8	34	58	1.19	2.59	5	27	80	0.1	clay (light)	0.2	24	4.4548	1.66364	1e-05	0.16654	0.000752775	0.32268	0.75369	0.97238	-6.44584	-8.20033	1054.29	6.38843e-08	1.46092e-07	1.27433e-06	1.48848e-07	3.40893e-06	8.12966e-07	1.62356e-05	30796.4	0.390993	7.17564e-06	37868.5	3271.97
4404	47	29	24	1.39	0.86	6.4	12	89	0.1	loam	0.32	23	1.4792	1.07612	3.98107e-07	0.08436	0.000181828	0.389831	0.790167	1.0056	-6.75598	-9.14729	2063.58	4.50937e-09	1.18953e-07	1.26301e-06	2.19067e-08	1.4603e-07	6.30213e-07	5.49451e-06	90999.9	0.44043	1.0288e-06	71972.5	2967.69
4408	36	19	45	1.28	0.99	6.4	24	99	0.1	clay (light)	0.2	24	1.7028	1.12075	3.98107e-07	0.24186	0.000635457	0.29747	0.738518	0.981621	-6.75223	-9.22112	2134.79	4.50937e-09	1.18953e-07	1.26301e-06	2.19067e-08	1.4603e-07	6.42458e-07	4.51476e-06	110748	0.399401	6.22534e-07	74304.5	2046.08
4412	44	33	23	1.39	0.99	4.9	9	51	0.1	loam	0.32	23	1.7028	1.37575	1.25893e-05	0.02294	0.000113525	0.555529	0.86333	1.01017	-6.53365	-7.698	1236.78	7.98957e-08	1.53411e-07	1.27738e-06	1.8308e-07	4.28882e-06	8.40837e-07	1.70843e-05	29266.7	0.445086	2.86453e-05	82507.6	30786.8
4413	44	33	23	1.39	0.99	4.9	9	51	0.1	loam	0.32	23	1.7028	1.37575	1.25893e-05	0.02294	0.000113525	0.555529	0.86333	1.01017	-6.53365	-7.698	1236.78	7.98957e-08	1.53411e-07	1.27738e-06	1.8308e-07	4.28882e-06	8.40837e-07	1.70843e-05	29266.7	0.445086	2.86453e-05	44184.5	16487
4414	45	30	25	1.38	2.6	5.3	20	61	0.1	loam	0.32	23	4.472	1.61387	5.01187e-06	0.10173	4.42227e-05	0.369191	0.779494	1.01362	-6.46088	-8.46841	1045.98	3.30394e-08	1.31993e-07	1.26845e-06	8.29028e-08	1.71387e-06	7.06907e-07	1.57924e-05	31660.8	0.448638	4.85649e-06	37579.3	2592.33
4416	83	11	6	1.67	0.5	6.6	5	94	0.1	loamy sand	0.17	13	0.86	0.870184	2.51189e-07	0.02764	2.14133e-05	0.530925	0.853608	0.817692	-6.96547	-9.28987	1889.41	3.60088e-09	1.18537e-07	1.26284e-06	1.99644e-08	9.61045e-08	6.23323e-07	1.89114e-06	264390	0.505532	5.04957e-07	66228.8	4469.87
4418	31	49	20	1.39	7	6	29	14	0.1	loam	0.32	23	12.04	1.80886	1e-06	0.19573	6.7052e-15	0.310527	0.746491	1.04009	-6.4114	-9.52979	933.331	8.23128e-09	1.20654e-07	1.26372e-06	2.9864e-08	3.50564e-07	6.35795e-07	9.328e-06	53602.1	0.476827	3.93865e-07	33638.6	338.632
4419	31	49	20	1.39	7	6	29	14	0.1	loam	0.32	23	12.04	1.80886	1e-06	0.19573	6.7052e-15	0.310527	0.746491	1.04009	-6.4114	-9.52979	933.331	8.23128e-09	1.20654e-07	1.26372e-06	2.9864e-08	3.50564e-07	6.35795e-07	9.328e-06	53602.1	0.476827	3.93865e-07	33638.6	338.632
4420	31	49	20	1.39	7	6	29	14	0.1	loam	0.32	23	12.04	1.80886	1e-06	0.19573	6.7052e-15	0.310527	0.746491	1.04009	-6.4114	-9.52979	933.331	8.23128e-09	1.20654e-07	1.26372e-06	2.9864e-08	3.50564e-07	6.35795e-07	9.328e-06	53602.1	0.476827	3.93865e-07	33638.6	338.632
4422	31	49	20	1.39	7	6	29	14	0.1	loam	0.32	23	12.04	1.80886	1e-06	0.19573	6.7052e-15	0.310527	0.746491	1.04009	-6.4114	-9.52979	933.331	8.23128e-09	1.20654e-07	1.26372e-06	2.9864e-08	3.50564e-07	6.35795e-07	9.328e-06	53602.1	0.476827	3.93865e-07	33638.6	338.632
4423	31	49	20	1.39	7	6	29	14	0.1	loam	0.32	23	12.04	1.80886	1e-06	0.19573	6.7052e-15	0.310527	0.746491	1.04009	-6.4114	-9.52979	933.331	8.23128e-09	1.20654e-07	1.26372e-06	2.9864e-08	3.50564e-07	6.35795e-07	9.328e-06	53602.1	0.476827	3.93865e-07	33638.6	338.632
4424	31	49	20	1.39	7	6	29	14	0.1	loam	0.32	23	12.04	1.80886	1e-06	0.19573	6.7052e-15	0.310527	0.746491	1.04009	-6.4114	-9.52979	933.331	8.23128e-09	1.20654e-07	1.26372e-06	2.9864e-08	3.50564e-07	6.35795e-07	9.328e-06	53602.1	0.476827	3.93865e-07	33644.7	338.693
4425	46	43	11	1.51	4.38	5.9	24	57	0.1	loam	0.32	23	7.5336	1.67721	1.25893e-06	0.16146	2.26376e-12	0.325206	0.755161	1.0798	-6.43455	-9.21639	984.446	9.83242e-09	1.21386e-07	1.26403e-06	3.32872e-08	4.38553e-07	6.40308e-07	9.71909e-06	51445.1	0.522487	6.80871e-07	35426.9	648.363
4446	53	22	25	1.4	0.98	5.1	6	49	0.1	sandy clay loam	0.16	13	1.6856	1.33853	7.94328e-06	0.00980092	2.2481e-07	0.663032	0.902368	0.71843	-6.73686	-8.13038	1116.14	5.11662e-08	1.40279e-07	1.2719e-06	1.21657e-07	2.71002e-06	7.56808e-07	5.56239e-06	89889.5	0.402242	1.02864e-05	40017	14883.5
4448	30	22	48	1.26	1.23	4.9	9	29	0.1	clay (light)	0.2	24	2.1156	1.44457	1.25893e-05	0.0217	8.41124e-07	0.562832	0.866153	0.978996	-6.52439	-7.80715	1263.31	7.98957e-08	1.53411e-07	1.27738e-06	1.8308e-07	4.28882e-06	8.37796e-07	1.05328e-05	47471	0.396995	1.65045e-05	45097.2	14027
4449	30	22	48	1.26	1.23	4.9	9	29	0.1	clay (light)	0.2	24	2.1156	1.44457	1.25893e-05	0.0217	8.41124e-07	0.562832	0.866153	0.978996	-6.52439	-7.80715	1263.31	7.98957e-08	1.53411e-07	1.27738e-06	1.8308e-07	4.28882e-06	8.37796e-07	1.05328e-05	47471	0.396995	1.65045e-05	45097.2	14027
4450	53	22	25	1.4	0.98	5.1	6	49	0.1	sandy clay loam	0.16	13	1.6856	1.33853	7.94328e-06	0.00980092	2.2481e-07	0.663032	0.902368	0.71843	-6.73686	-8.13038	1116.14	5.11662e-08	1.40279e-07	1.2719e-06	1.21657e-07	2.71002e-06	7.56808e-07	5.56239e-06	89889.5	0.402242	1.02864e-05	40017	14883.5
4451	53	22	25	1.4	0.98	5.1	6	49	0.1	sandy clay loam	0.16	13	1.6856	1.33853	7.94328e-06	0.00980092	2.2481e-07	0.663032	0.902368	0.71843	-6.73686	-8.13038	1116.14	5.11662e-08	1.40279e-07	1.2719e-06	1.21657e-07	2.71002e-06	7.56808e-07	5.56239e-06	89889.5	0.402242	1.02864e-05	40017	14883.5
4452	78	12	10	1.58	0.61	6.2	4	72	0.1	sandy loam	0.2	13	1.0492	1.00123	6.30957e-07	0.01159	1.56676e-10	0.64279	0.8954	0.781742	-6.9077	-8.99585	1654.06	5.94924e-09	1.19611e-07	1.26329e-06	2.49851e-08	2.25157e-07	6.29363e-07	2.398e-06	208507	0.465371	1.34235e-06	58375.6	7603.54
4455	34	43	23	1.38	0.83	4.9	7	30	0.1	loam	0.32	23	1.4276	1.31986	1.25893e-05	0.00981081	3.54799e-06	0.662912	0.902327	1.00841	-6.55742	-7.63129	1306.36	7.98957e-08	1.53411e-07	1.27738e-06	1.8308e-07	4.28882e-06	8.37869e-07	1.43084e-05	34944.5	0.443285	3.378e-05	46574.9	24371.1
4457	25	22	53	1.24	2.73	4.9	16	35	0.1	clay (light)	0.2	24	4.6956	1.69733	1.25893e-05	0.06121	8.49833e-07	0.42797	0.808823	0.979601	-6.42129	-8.11483	996.352	7.98957e-08	1.53411e-07	1.27738e-06	1.8308e-07	4.28882e-06	8.37796e-07	1.38518e-05	36096.3	0.397548	8.24643e-06	35849.2	4242.27
4459	46	30	24	1.39	1.73	5	9	27	0.1	loam	0.32	23	2.9756	1.53571	1e-05	0.02371	8.80148e-08	0.551181	0.861635	1.01259	-6.47371	-8.01179	1077.33	6.38843e-08	1.46092e-07	1.27433e-06	1.48848e-07	3.40893e-06	7.92649e-07	1.51438e-05	33016.8	0.447568	1.38309e-05	38669.9	7903.43
4460	29	25	46	1.26	1.07	4.6	11	38	0.1	clay (light)	0.2	24	1.8404	1.45139	2.51189e-05	0.02757	8.3551e-05	0.531261	0.853743	0.980765	-6.50099	-7.45185	1197.06	1.57375e-07	1.88826e-07	1.29214e-06	3.48727e-07	8.5466e-06	1.05839e-06	1.68273e-05	29713.5	0.398615	3.72502e-05	42815.7	18890.3
4461	49	27	24	1.4	1	4.6	7	44	0.1	sandy clay loam	0.16	13	1.72	1.42994	2.51189e-05	0.0091147	2.11533e-05	0.671608	0.905272	0.721664	-6.66517	-7.63557	946.295	1.57375e-07	1.88826e-07	1.29214e-06	3.48727e-07	8.5466e-06	1.05671e-06	1.06459e-05	46966.4	0.405248	3.19038e-05	34098.9	20705.7
4462	49	27	24	1.4	1	4.6	7	44	0.1	sandy clay loam	0.16	13	1.72	1.42994	2.51189e-05	0.0091147	2.11533e-05	0.671608	0.905272	0.721664	-6.66517	-7.63557	946.295	1.57375e-07	1.88826e-07	1.29214e-06	3.48727e-07	8.5466e-06	1.05671e-06	1.06459e-05	46966.4	0.405248	3.19038e-05	34098.9	20705.7
4463	49	27	24	1.4	1	4.6	7	44	0.1	sandy clay loam	0.16	13	1.72	1.42994	2.51189e-05	0.0091147	2.11533e-05	0.671608	0.905272	0.721664	-6.66517	-7.63557	946.295	1.57375e-07	1.88826e-07	1.29214e-06	3.48727e-07	8.5466e-06	1.05671e-06	1.06459e-05	46966.4	0.405248	3.19038e-05	34098.9	20705.7
4464	49	27	24	1.4	1	4.6	7	44	0.1	sandy clay loam	0.16	13	1.72	1.42994	2.51189e-05	0.0091147	2.11533e-05	0.671608	0.905272	0.721664	-6.66517	-7.63557	946.295	1.57375e-07	1.88826e-07	1.29214e-06	3.48727e-07	8.5466e-06	1.05671e-06	1.06459e-05	46966.4	0.405248	3.19038e-05	34098.9	20705.7
4465	49	27	24	1.4	1	4.6	7	44	0.1	sandy clay loam	0.16	13	1.72	1.42994	2.51189e-05	0.0091147	2.11533e-05	0.671608	0.905272	0.721664	-6.66517	-7.63557	946.295	1.57375e-07	1.88826e-07	1.29214e-06	3.48727e-07	8.5466e-06	1.05671e-06	1.06459e-05	46966.4	0.405248	3.19038e-05	34098.9	20705.7
4466	49	27	24	1.4	1	4.6	7	44	0.1	sandy clay loam	0.16	13	1.72	1.42994	2.51189e-05	0.0091147	2.11533e-05	0.671608	0.905272	0.721664	-6.66517	-7.63557	946.295	1.57375e-07	1.88826e-07	1.29214e-06	3.48727e-07	8.5466e-06	1.05671e-06	1.06459e-05	46966.4	0.405248	3.19038e-05	34098.9	20705.7
4467	49	27	24	1.4	1	4.6	7	44	0.1	sandy clay loam	0.16	13	1.72	1.42994	2.51189e-05	0.0091147	2.11533e-05	0.671608	0.905272	0.721664	-6.66517	-7.63557	946.295	1.57375e-07	1.88826e-07	1.29214e-06	3.48727e-07	8.5466e-06	1.05671e-06	1.06459e-05	46966.4	0.405248	3.19038e-05	34098.9	20705.7
4468	47	30	23	1.4	1.13	4.8	6	54	0.1	loam	0.32	23	1.9436	1.43468	1.58489e-05	0.00658977	4.9024e-07	0.708402	0.917424	1.01149	-6.50239	-7.64805	1150.87	1.00052e-07	1.62624e-07	1.28122e-06	2.26173e-07	5.39649e-06	8.94594e-07	1.52813e-05	32719.7	0.446442	3.18101e-05	41219.6	19153.3
4469	47	30	23	1.4	1.13	4.8	6	54	0.1	loam	0.32	23	1.9436	1.43468	1.58489e-05	0.00658977	4.9024e-07	0.708402	0.917424	1.01149	-6.50239	-7.64805	1150.87	1.00052e-07	1.62624e-07	1.28122e-06	2.26173e-07	5.39649e-06	8.94594e-07	1.52813e-05	32719.7	0.446442	3.18101e-05	41219.6	19153.3
4470	41	39	20	1.41	1.45	5.1	12	37	0.1	loam	0.32	23	2.494	1.46273	7.94328e-06	0.04062	7.41018e-06	0.480209	0.832449	1.02436	-6.50282	-8.03401	1152.03	5.11662e-08	1.40279e-07	1.2719e-06	1.21657e-07	2.71002e-06	7.57002e-07	1.53608e-05	32550.4	0.45987	1.26081e-05	41259.9	7786.99
4472	22	31	47	1.25	1.72	5	17	28	0.1	clay (light)	0.2	24	2.9584	1.53387	1e-05	0.06564	7.19697e-06	0.41941	0.804748	0.983909	-6.49166	-8.03278	1171.62	6.38843e-08	1.46092e-07	1.27433e-06	1.48848e-07	3.40893e-06	7.92841e-07	1.24391e-05	40196	0.401511	9.78416e-06	41937.2	6622.21
4473	41	39	20	1.41	1.45	5.1	12	37	0.1	loam	0.32	23	2.494	1.46273	7.94328e-06	0.04062	7.41018e-06	0.480209	0.832449	1.02436	-6.50282	-8.03401	1152.03	5.11662e-08	1.40279e-07	1.2719e-06	1.21657e-07	2.71002e-06	7.57002e-07	1.53608e-05	32550.4	0.45987	1.26081e-05	41259.9	7786.99
4474	41	39	20	1.41	1.45	5.1	12	37	0.1	loam	0.32	23	2.494	1.46273	7.94328e-06	0.04062	7.41018e-06	0.480209	0.832449	1.02436	-6.50282	-8.03401	1152.03	5.11662e-08	1.40279e-07	1.2719e-06	1.21657e-07	2.71002e-06	7.57002e-07	1.53608e-05	32550.4	0.45987	1.26081e-05	41259.9	7786.99
4475	42	36	22	1.4	1	6.6	16	93	0.1	loam	0.32	23	1.72	1.08994	2.51189e-07	0.13481	0.000188303	0.34105	0.764195	1.01357	-6.75863	-9.39913	2076.18	3.60088e-09	1.18537e-07	1.26284e-06	1.99644e-08	9.61045e-08	6.27828e-07	5.54833e-06	90117.2	0.448586	5.61577e-07	72386	1643.3
4476	52	25	23	1.41	0.95	4.7	6	39	0.1	sandy clay loam	0.16	13	1.634	1.39667	1.99526e-05	0.00613307	2.9035e-06	0.716192	0.919936	0.724312	-6.68362	-7.7136	987.363	1.25428e-07	1.74223e-07	1.28605e-06	2.80426e-07	6.791e-06	9.66178e-07	8.6651e-06	57702.8	0.407726	2.63072e-05	35535.3	21993.7
4477	44	36	20	1.41	0.97	6.5	11	90	0.1	loam	0.32	23	1.6684	1.09728	3.16228e-07	0.07013	8.02552e-05	0.411424	0.800889	1.02035	-6.74506	-9.28187	2012.31	4.00306e-09	1.18721e-07	1.26292e-06	2.08242e-08	1.18206e-07	6.26045e-07	4.87865e-06	102487	0.455637	7.19125e-07	70288	2360.34
4478	44	36	20	1.41	0.97	6.5	11	90	0.1	loam	0.32	23	1.6684	1.09728	3.16228e-07	0.07013	8.02552e-05	0.411424	0.800889	1.02035	-6.74506	-9.28187	2012.31	4.00306e-09	1.18721e-07	1.26292e-06	2.08242e-08	1.18206e-07	6.26045e-07	4.87865e-06	102487	0.455637	7.19125e-07	70288	2360.34
4479	41	36	23	1.39	2.72	5.2	21	24	0.1	loam	0.32	23	4.6784	1.64517	6.30957e-06	0.10286	1.93617e-06	0.368018	0.778874	1.02027	-6.43765	-8.38047	991.499	4.10639e-08	1.35661e-07	1.26998e-06	1.00059e-07	2.15485e-06	7.28382e-07	1.77825e-05	28117.5	0.455554	5.81413e-06	35679.7	2657.19
4480	41	36	23	1.39	2.72	5.2	21	24	0.1	loam	0.32	23	4.6784	1.64517	6.30957e-06	0.10286	1.93617e-06	0.368018	0.778874	1.02027	-6.43765	-8.38047	991.499	4.10639e-08	1.35661e-07	1.26998e-06	1.00059e-07	2.15485e-06	7.28382e-07	1.77825e-05	28117.5	0.455554	5.81413e-06	35679.7	2657.19
4481	41	36	23	1.39	2.72	5.2	21	24	0.1	loam	0.32	23	4.6784	1.64517	6.30957e-06	0.10286	1.93617e-06	0.368018	0.778874	1.02027	-6.43765	-8.38047	991.499	4.10639e-08	1.35661e-07	1.26998e-06	1.00059e-07	2.15485e-06	7.28382e-07	1.77825e-05	28117.5	0.455554	5.81413e-06	35679.7	2657.19
4486	19	21	60	1.21	1.57	4.9	6	22	0.1	clay(heavy)	0.2	24	2.7004	1.52194	1.25893e-05	0.0075547	8.2164e-12	0.693216	0.912467	0.964862	-6.50142	-7.91293	1198.23	7.98957e-08	1.53411e-07	1.27738e-06	1.8308e-07	4.28882e-06	8.37773e-07	8.55165e-06	58468.2	0.384283	1.39167e-05	42856.2	13400.5
4487	53	20	27	1.39	2.34	4.8	8	20	0.1	sandy clay loam	0.16	13	4.0248	1.66546	1.58489e-05	0.01715	3.29427e-11	0.59346	0.877703	0.721409	-6.58264	-8.16438	782.516	1.00052e-07	1.62624e-07	1.28122e-06	2.26173e-07	5.39649e-06	8.94581e-07	9.12049e-06	54821.6	0.40501	9.51485e-06	28335.5	5986.19
4488	53	20	27	1.39	2.34	4.8	8	20	0.1	sandy clay loam	0.16	13	4.0248	1.66546	1.58489e-05	0.01715	3.29427e-11	0.59346	0.877703	0.721409	-6.58264	-8.16438	782.516	1.00052e-07	1.62624e-07	1.28122e-06	2.26173e-07	5.39649e-06	8.94581e-07	9.12049e-06	54821.6	0.40501	9.51485e-06	28335.5	5986.19
4489	53	20	27	1.39	2.34	4.8	8	20	0.1	sandy clay loam	0.16	13	4.0248	1.66546	1.58489e-05	0.01715	3.29427e-11	0.59346	0.877703	0.721409	-6.58264	-8.16438	782.516	1.00052e-07	1.62624e-07	1.28122e-06	2.26173e-07	5.39649e-06	8.94581e-07	9.12049e-06	54821.6	0.40501	9.51485e-06	28335.5	5986.19
4490	60	14	26	1.41	1.06	5	6	38	0.1	sandy clay loam	0.16	13	1.8232	1.38041	1e-05	0.0097157	1.11868e-07	0.66407	0.902721	0.716301	-6.7146	-8.06244	1060.37	6.38843e-08	1.46092e-07	1.27433e-06	1.48848e-07	3.40893e-06	7.9265e-07	6.28471e-06	79558.2	0.400275	1.20018e-05	38080.1	14554.2
4491	28	20	52	1.24	1.65	4.9	9	24	0.1	clay (light)	0.2	24	2.838	1.5377	1.25893e-05	0.022	8.40027e-10	0.561029	0.865459	0.975986	-6.48834	-7.92313	1162.69	7.98957e-08	1.53411e-07	1.27738e-06	1.8308e-07	4.28882e-06	8.37773e-07	1.05665e-05	47319.1	0.394253	1.29293e-05	41628.5	10041.1
4492	62	12	26	1.41	0.68	5.4	5	75	0.1	sandy clay loam	0.16	13	1.1696	1.17167	3.98107e-06	0.00848936	3.83237e-07	0.679888	0.908049	0.711867	-6.82818	-8.29444	1377.33	2.66652e-08	1.2908e-07	1.26723e-06	6.92751e-08	1.36359e-06	6.87759e-07	3.83263e-06	130459	0.396209	7.10689e-06	49003.2	18001.2
4493	62	12	26	1.41	0.68	5.4	5	75	0.1	sandy clay loam	0.16	13	1.1696	1.17167	3.98107e-06	0.00848936	3.83237e-07	0.679888	0.908049	0.711867	-6.82818	-8.29444	1377.33	2.66652e-08	1.2908e-07	1.26723e-06	6.92751e-08	1.36359e-06	6.87759e-07	3.83263e-06	130459	0.396209	7.10689e-06	49003.2	18001.2
4494	22	19	59	1.21	1.42	5.4	10	61	0.1	clay(heavy)	0.2	24	2.4424	1.40511	3.98107e-06	0.03369	5.30651e-09	0.504765	0.842893	0.965107	-6.58136	-8.37392	1440.4	2.66652e-08	1.2908e-07	1.26723e-06	6.92751e-08	1.36359e-06	6.87749e-07	6.45289e-06	77484.6	0.3845	4.81176e-06	51152.6	7333.04
4495	64	12	24	1.43	0.73	4.6	5	44	0.1	sandy clay loam	0.16	13	1.2556	1.33016	2.51189e-05	0.00295642	8.78748e-06	0.787414	0.942	0.71852	-6.70761	-7.51648	1043.43	1.57375e-07	1.88826e-07	1.29214e-06	3.48727e-07	8.5466e-06	1.05638e-06	9.07971e-06	55067.8	0.402325	4.1388e-05	37490.8	34377.4
4496	64	12	24	1.43	0.73	4.6	5	44	0.1	sandy clay loam	0.16	13	1.2556	1.33016	2.51189e-05	0.00295642	8.78748e-06	0.787414	0.942	0.71852	-6.70761	-7.51648	1043.43	1.57375e-07	1.88826e-07	1.29214e-06	3.48727e-07	8.5466e-06	1.05638e-06	9.07971e-06	55067.8	0.402325	4.1388e-05	37490.8	34377.4
4498	16	29	55	1.21	1.65	4.7	24	49	0.1	clay (light)	0.2	24	2.838	1.5717	1.99526e-05	0.12575	0.000814518	0.347642	0.767862	0.971821	-6.46398	-7.72651	1099.27	1.25428e-07	1.74223e-07	1.28605e-06	2.80426e-07	6.791e-06	9.88086e-07	2.23977e-05	22323.7	0.39049	2.1038e-05	39431.6	7231.44
4499	16	29	55	1.21	1.65	4.7	24	49	0.1	clay (light)	0.2	24	2.838	1.5717	1.99526e-05	0.12575	0.000814518	0.347642	0.767862	0.971821	-6.46398	-7.72651	1099.27	1.25428e-07	1.74223e-07	1.28605e-06	2.80426e-07	6.791e-06	9.88086e-07	2.23977e-05	22323.7	0.39049	2.1038e-05	39431.6	7231.44
4500	17	31	52	1.22	1.25	5.8	26	78	0.1	clay (light)	0.2	24	2.15	1.29668	1.58489e-06	0.20066	0.00110869	0.308815	0.74546	0.973213	-6.64665	-8.71807	1674.06	1.1848e-08	1.22307e-07	1.26441e-06	3.75965e-08	5.4932e-07	6.75915e-07	7.06419e-06	70779.6	0.391743	2.12069e-06	59047.2	3472.04
4502	17	31	52	1.22	1.25	5.8	26	78	0.1	clay (light)	0.2	24	2.15	1.29668	1.58489e-06	0.20066	0.00110869	0.308815	0.74546	0.973213	-6.64665	-8.71807	1674.06	1.1848e-08	1.22307e-07	1.26441e-06	3.75965e-08	5.4932e-07	6.75915e-07	7.06419e-06	70779.6	0.391743	2.12069e-06	59047.2	3472.04
4503	78	13	9	1.6	0.56	6.3	6	74	0.1	sandy loam	0.2	13	0.9632	0.957113	5.01187e-07	0.0288	2.62541e-05	0.525488	0.851414	0.788713	-6.92796	-9.05715	1733.08	5.14678e-09	1.19244e-07	1.26313e-06	2.32695e-08	1.81058e-07	6.2781e-07	2.72604e-06	183417	0.4729	1.13275e-06	61024.4	5995.77
4504	37	40	23	1.38	1.07	6.2	13	88	0.1	loam	0.32	23	1.8404	1.17939	6.30957e-07	0.08447	0.000241459	0.389683	0.790092	1.01095	-6.69776	-9.02741	1804.69	5.94924e-09	1.19611e-07	1.26329e-06	2.49851e-08	2.25157e-07	6.35881e-07	6.33976e-06	78867.4	0.445882	1.34898e-06	63414.2	3008.22
4506	17	31	52	1.23	4.2	5	23	22	0.1	clay (light)	0.2	24	7.224	1.81691	1e-05	0.10448	2.1852e-07	0.366367	0.777999	0.985319	-6.37578	-8.37671	897.229	6.38843e-08	1.46092e-07	1.27433e-06	1.48848e-07	3.40893e-06	7.92653e-07	1.42394e-05	35113.7	0.402817	4.48941e-06	32378.1	2056.01
4507	17	31	52	1.23	4.2	5	23	22	0.1	clay (light)	0.2	24	7.224	1.81691	1e-05	0.10448	2.1852e-07	0.366367	0.777999	0.985319	-6.37578	-8.37671	897.229	6.38843e-08	1.46092e-07	1.27433e-06	1.48848e-07	3.40893e-06	7.92653e-07	1.42394e-05	35113.7	0.402817	4.48941e-06	32378.1	2056.01
4513	73	18	9	1.59	1.4	7.5	12	75	0.1	sandy loam	0.2	13	2.408	1.04361	3.16228e-08	0.11474	6.78084e-11	0.356698	0.772814	0.797865	-6.96556	-10.6039	1889.82	2.24315e-09	1.17917e-07	1.26258e-06	1.70616e-08	2.1492e-08	6.18918e-07	2.31786e-06	215716	0.482972	3.16921e-08	66242.4	218.721
4515	49	32	19	1.43	1.1	5	7	36	0.1	loam	0.32	23	1.892	1.39215	1e-05	0.01271	9.51976e-07	0.631412	0.891412	1.02541	-6.52436	-7.82638	1210.6	6.38843e-08	1.46092e-07	1.27433e-06	1.48848e-07	3.40893e-06	7.92672e-07	1.32196e-05	37822.7	0.460983	2.00038e-05	43282.7	15096.1
4516	78	12	10	1.58	0.87	5.3	5	53	0.1	sandy loam	0.2	13	1.4964	1.26678	5.01187e-06	0.00811623	2.78374e-07	0.685063	0.909772	0.785289	-6.73895	-8.23021	1121.52	3.30394e-08	1.31993e-07	1.26845e-06	8.29028e-08	1.71387e-06	7.05721e-07	5.31774e-06	94024.9	0.469186	7.7618e-06	40203.3	13766.1
4517	81	11	8	1.62	0.58	6.7	6	88	0.1	loamy sand	0.17	13	0.9976	0.900238	1.99526e-07	0.03669	1.59918e-05	0.493534	0.838165	0.79781	-6.9717	-9.46335	1916.72	3.28141e-09	1.18391e-07	1.26278e-06	1.92814e-08	7.85485e-08	6.22276e-07	1.92478e-06	259770	0.482911	3.65482e-07	67133.5	3077.94
4520	19	32	49	1.24	1.26	6.4	27	93	0.1	clay (light)	0.2	24	2.1672	1.19721	3.98107e-07	0.24041	0.000606043	0.297792	0.738717	0.977705	-6.72351	-9.31751	1998.16	4.50937e-09	1.18953e-07	1.26301e-06	2.19067e-08	1.4603e-07	6.41664e-07	4.50896e-06	110890	0.395817	5.19375e-07	69821.9	1591.7
4522	19	32	49	1.24	1.26	6.4	27	93	0.1	clay (light)	0.2	24	2.1672	1.19721	3.98107e-07	0.24041	0.000606043	0.297792	0.738717	0.977705	-6.72351	-9.31751	1998.16	4.50937e-09	1.18953e-07	1.26301e-06	2.19067e-08	1.4603e-07	6.41664e-07	4.50896e-06	110890	0.395817	5.19375e-07	69821.9	1591.7
4523	19	32	49	1.24	1.26	6.4	27	93	0.1	clay (light)	0.2	24	2.1672	1.19721	3.98107e-07	0.24041	0.000606043	0.297792	0.738717	0.977705	-6.72351	-9.31751	1998.16	4.50937e-09	1.18953e-07	1.26301e-06	2.19067e-08	1.4603e-07	6.41664e-07	4.50896e-06	110890	0.395817	5.19375e-07	69821.9	1591.7
4524	19	32	49	1.24	1.26	6.4	27	93	0.1	clay (light)	0.2	24	2.1672	1.19721	3.98107e-07	0.24041	0.000606043	0.297792	0.738717	0.977705	-6.72351	-9.31751	1998.16	4.50937e-09	1.18953e-07	1.26301e-06	2.19067e-08	1.4603e-07	6.41664e-07	4.50896e-06	110890	0.395817	5.19375e-07	123364	2812.27
4526	8	34	58	1.19	2.59	5	27	80	0.1	clay (light)	0.2	24	4.4548	1.66364	1e-05	0.16654	0.000752775	0.32268	0.75369	0.97238	-6.44584	-8.20033	1054.29	6.38843e-08	1.46092e-07	1.27433e-06	1.48848e-07	3.40893e-06	8.12966e-07	1.62356e-05	30796.4	0.390993	7.17564e-06	37868.5	3271.97
4527	8	34	58	1.19	2.59	5	27	80	0.1	clay (light)	0.2	24	4.4548	1.66364	1e-05	0.16654	0.000752775	0.32268	0.75369	0.97238	-6.44584	-8.20033	1054.29	6.38843e-08	1.46092e-07	1.27433e-06	1.48848e-07	3.40893e-06	8.12966e-07	1.62356e-05	30796.4	0.390993	7.17564e-06	37868.5	3271.97
4528	26	27	47	1.25	1.22	6.3	18	77	0.1	clay (light)	0.2	24	2.0984	1.20398	5.01187e-07	0.11486	0.000189376	0.356593	0.772757	0.980478	-6.71257	-9.20279	1948.47	5.14678e-09	1.19244e-07	1.26313e-06	2.32695e-08	1.81058e-07	6.32214e-07	4.02187e-06	124320	0.398352	6.66708e-07	68182.9	2251.23
4529	26	27	47	1.25	1.22	6.3	18	77	0.1	clay (light)	0.2	24	2.0984	1.20398	5.01187e-07	0.11486	0.000189376	0.356593	0.772757	0.980478	-6.71257	-9.20279	1948.47	5.14678e-09	1.19244e-07	1.26313e-06	2.32695e-08	1.81058e-07	6.32214e-07	4.02187e-06	124320	0.398352	6.66708e-07	68182.9	2251.23
4530	26	27	47	1.25	1.22	6.3	18	77	0.1	clay (light)	0.2	24	2.0984	1.20398	5.01187e-07	0.11486	0.000189376	0.356593	0.772757	0.980478	-6.71257	-9.20279	1948.47	5.14678e-09	1.19244e-07	1.26313e-06	2.32695e-08	1.81058e-07	6.32214e-07	4.02187e-06	124320	0.398352	6.66708e-07	68182.9	2251.23
4531	47	29	24	1.39	0.86	6.4	12	89	0.1	loam	0.32	23	1.4792	1.07612	3.98107e-07	0.08436	0.000181828	0.389831	0.790167	1.0056	-6.75598	-9.14729	2063.58	4.50937e-09	1.18953e-07	1.26301e-06	2.19067e-08	1.4603e-07	6.30213e-07	5.49451e-06	90999.9	0.44043	1.0288e-06	71972.5	2967.69
4534	47	32	21	1.41	0.82	6.2	11	88	0.1	loam	0.32	23	1.4104	1.09502	6.30957e-07	0.07371	0.000260118	0.405498	0.797989	1.01505	-6.72959	-8.92123	1941.93	5.94924e-09	1.19611e-07	1.26329e-06	2.49851e-08	2.25157e-07	6.36385e-07	6.0933e-06	82057.3	0.450109	1.67011e-06	67966.9	4192.54
4535	47	32	21	1.41	0.82	6.2	11	88	0.1	loam	0.32	23	1.4104	1.09502	6.30957e-07	0.07371	0.000260118	0.405498	0.797989	1.01505	-6.72959	-8.92123	1941.93	5.94924e-09	1.19611e-07	1.26329e-06	2.49851e-08	2.25157e-07	6.36385e-07	6.0933e-06	82057.3	0.450109	1.67011e-06	67966.9	4192.54
4536	47	32	21	1.41	0.82	6.2	11	88	0.1	loam	0.32	23	1.4104	1.09502	6.30957e-07	0.07371	0.000260118	0.405498	0.797989	1.01505	-6.72959	-8.92123	1941.93	5.94924e-09	1.19611e-07	1.26329e-06	2.49851e-08	2.25157e-07	6.36385e-07	6.0933e-06	82057.3	0.450109	1.67011e-06	67966.9	4192.54
4537	47	32	21	1.41	0.82	6.2	11	88	0.1	loam	0.32	23	1.4104	1.09502	6.30957e-07	0.07371	0.000260118	0.405498	0.797989	1.01505	-6.72959	-8.92123	1941.93	5.94924e-09	1.19611e-07	1.26329e-06	2.49851e-08	2.25157e-07	6.36385e-07	6.0933e-06	82057.3	0.450109	1.67011e-06	67966.9	4192.54
4541	22	23	55	1.22	1.32	5.6	14	61	0.1	clay (light)	0.2	24	2.2704	1.34795	2.51189e-06	0.06067	2.35108e-06	0.429065	0.809339	0.969592	-6.61494	-8.54206	1556.19	1.75803e-08	1.24927e-07	1.2655e-06	4.98519e-08	8.64331e-07	6.62208e-07	6.13968e-06	81437.4	0.388491	3.20703e-06	55078.2	5588.4
4543	22	23	55	1.22	1.32	5.6	14	61	0.1	clay (light)	0.2	24	2.2704	1.34795	2.51189e-06	0.06067	2.35108e-06	0.429065	0.809339	0.969592	-6.61494	-8.54206	1556.19	1.75803e-08	1.24927e-07	1.2655e-06	4.98519e-08	8.64331e-07	6.62208e-07	6.13968e-06	81437.4	0.388491	3.20703e-06	55078.2	5588.4
4544	22	23	55	1.22	1.32	5.6	14	61	0.1	clay (light)	0.2	24	2.2704	1.34795	2.51189e-06	0.06067	2.35108e-06	0.429065	0.809339	0.969592	-6.61494	-8.54206	1556.19	1.75803e-08	1.24927e-07	1.2655e-06	4.98519e-08	8.64331e-07	6.62208e-07	6.13968e-06	81437.4	0.388491	3.20703e-06	55078.2	5588.4
4545	17	27	56	1.21	1.74	6	15	72	0.1	clay (light)	0.2	24	2.9928	1.36754	1e-06	0.07503	1.65002e-07	0.403404	0.796957	0.971013	-6.63221	-9.04769	1619.32	8.23128e-09	1.20654e-07	1.26372e-06	2.9864e-08	3.50564e-07	6.358e-07	4.48774e-06	111415	0.389764	1.00607e-06	57207.4	2499.34
4546	17	27	56	1.21	1.74	6	15	72	0.1	clay (light)	0.2	24	2.9928	1.36754	1e-06	0.07503	1.65002e-07	0.403404	0.796957	0.971013	-6.63221	-9.04769	1619.32	8.23128e-09	1.20654e-07	1.26372e-06	2.9864e-08	3.50564e-07	6.358e-07	4.48774e-06	111415	0.389764	1.00607e-06	57207.4	2499.34
4547	15	28	57	1.21	2.67	5.4	24	32	0.1	clay (light)	0.2	24	4.5924	1.60529	3.98107e-06	0.11884	1.06932e-06	0.35318	0.770902	0.973976	-6.49468	-8.6108	1179.78	2.66652e-08	1.2908e-07	1.26723e-06	6.92751e-08	1.36359e-06	6.87778e-07	9.22254e-06	54215	0.392432	2.7325e-06	42219.2	2454.45
4548	15	28	57	1.21	2.67	5.4	24	32	0.1	clay (light)	0.2	24	4.5924	1.60529	3.98107e-06	0.11884	1.06932e-06	0.35318	0.770902	0.973976	-6.49468	-8.6108	1179.78	2.66652e-08	1.2908e-07	1.26723e-06	6.92751e-08	1.36359e-06	6.87778e-07	9.22254e-06	54215	0.392432	2.7325e-06	42219.2	2454.45
4550	26	33	41	1.27	30.73	4.4	77	58	0.1	clay (light)	0.2	16	52.8556	2.54986	3.98107e-05	0.43119	2.13795e-11	0.283892	0.729942	0.819991	-6.13796	-8.67986	345.929	2.48224e-07	2.30352e-07	1.30945e-06	5.42959e-07	1.35391e-05	1.31219e-06	4.24045e-05	11791.2	0.412925	3.16566e-06	12694.3	195.66
4551	26	33	41	1.27	30.73	4.4	77	58	0.1	clay (light)	0.2	16	52.8556	2.54986	3.98107e-05	0.43119	2.13795e-11	0.283892	0.729942	0.819991	-6.13796	-8.67986	345.929	2.48224e-07	2.30352e-07	1.30945e-06	5.42959e-07	1.35391e-05	1.31219e-06	4.24045e-05	11791.2	0.412925	3.16566e-06	12694.3	195.66
4552	26	33	41	1.27	30.73	4.4	77	58	0.1	clay (light)	0.2	16	52.8556	2.54986	3.98107e-05	0.43119	2.13795e-11	0.283892	0.729942	0.819991	-6.13796	-8.67986	345.929	2.48224e-07	2.30352e-07	1.30945e-06	5.42959e-07	1.35391e-05	1.31219e-06	4.24045e-05	11791.2	0.412925	3.16566e-06	12694.3	195.66
4553	25	35	40	1.27	38.37	5.9	88	100	0.1	clay (light)	0.2	16	65.9964	2.36525	1.25893e-06	0.63303	2.97887e-15	0.303026	0.741942	0.824043	-6.30836	-10.2624	512.148	9.83242e-09	1.21386e-07	1.26403e-06	3.32872e-08	4.38553e-07	6.40308e-07	6.51905e-06	76698.3	0.416795	8.2011e-08	18697.6	49.0191
4555	25	35	40	1.27	38.37	5.9	88	100	0.1	clay (light)	0.2	16	65.9964	2.36525	1.25893e-06	0.63303	2.97887e-15	0.303026	0.741942	0.824043	-6.30836	-10.2624	512.148	9.83242e-09	1.21386e-07	1.26403e-06	3.32872e-08	4.38553e-07	6.40308e-07	6.51905e-06	76698.3	0.416795	8.2011e-08	18697.6	49.0191
4556	25	35	40	1.27	38.37	5.9	88	100	0.1	clay (light)	0.2	16	65.9964	2.36525	1.25893e-06	0.63303	2.97887e-15	0.303026	0.741942	0.824043	-6.30836	-10.2624	512.148	9.83242e-09	1.21386e-07	1.26403e-06	3.32872e-08	4.38553e-07	6.40308e-07	6.51905e-06	76698.3	0.416795	8.2011e-08	18697.6	49.0191
4557	25	35	40	1.27	38.37	5.9	88	100	0.1	clay (light)	0.2	16	65.9964	2.36525	1.25893e-06	0.63303	2.97887e-15	0.303026	0.741942	0.824043	-6.30836	-10.2624	512.148	9.83242e-09	1.21386e-07	1.26403e-06	3.32872e-08	4.38553e-07	6.40308e-07	6.51905e-06	76698.3	0.416795	8.2011e-08	18697.6	49.0191
4558	86	10	4	1.73	1.62	4.5	5	18	0.1	loamy sand	0.17	13	2.7864	1.59988	3.16228e-05	0.00294861	1.46822e-08	0.787645	0.942069	0.859546	-6.50685	-7.61036	657.21	1.97593e-07	2.07209e-07	1.2998e-06	4.34711e-07	1.07567e-05	1.16949e-06	1.11651e-05	44782.4	0.556677	2.11635e-05	23888	12603.1
4560	90	7	3	1.78	2.85	4.4	4	18	0.1	sand	0.1	13	4.902	1.79597	3.98107e-05	0.000635005	3.59341e-11	0.891355	0.971656	0.886554	-6.40443	-7.70683	519.135	2.48224e-07	2.30352e-07	1.30945e-06	5.42959e-07	1.35391e-05	1.31219e-06	6.7528e-06	74043.3	0.592393	9.1052e-06	18948.6	7567.68
4561	85	11	4	1.73	2.09	4.5	10	16	0.1	loamy sand	0.17	13	3.5948	1.68064	3.16228e-05	0.02844	3.44835e-06	0.527152	0.852087	0.862091	-6.4725	-7.70676	607.23	1.97593e-07	2.07209e-07	1.2998e-06	4.34711e-07	1.07567e-05	1.16958e-06	1.66826e-05	29971.4	0.559948	1.68516e-05	22104.8	6251.47
4562	89	7	4	1.74	0.4	5.9	3	70	0.1	sand	0.1	13	0.688	0.91844	1.25893e-06	0.00329476	1.73119e-06	0.777769	0.939102	0.845575	-6.88348	-8.48104	1564.37	9.83242e-09	1.21386e-07	1.26403e-06	3.32872e-08	4.38553e-07	6.40354e-07	1.26996e-06	393715	0.539053	1.72157e-06	55354.3	20225
4563	89	6	5	1.7	0.4	6.4	3	100	0.1	sand	0.1	13	0.688	0.83344	3.98107e-07	0.0081224	4.87455e-06	0.684976	0.909743	0.829003	-6.96058	-8.99446	1868.24	4.50937e-09	1.18953e-07	1.26301e-06	2.19067e-08	1.4603e-07	6.25437e-07	9.75955e-07	512319	0.518872	5.61272e-07	65526.7	9776.7
4564	89	6	5	1.7	0.4	6.4	3	100	0.1	sand	0.1	13	0.688	0.83344	3.98107e-07	0.0081224	4.87455e-06	0.684976	0.909743	0.829003	-6.96058	-8.99446	1868.24	4.50937e-09	1.18953e-07	1.26301e-06	2.19067e-08	1.4603e-07	6.25437e-07	9.75955e-07	512319	0.518872	5.61272e-07	65526.7	9776.7
4565	89	5	6	1.68	0.4	5.6	2	71	0.1	sand	0.1	13	0.688	0.96944	2.51189e-06	6.03449e-05	2.25338e-08	0.964385	0.990975	0.815463	-6.86126	-8.20543	1486.33	1.75803e-08	1.24927e-07	1.2655e-06	4.98519e-08	8.64331e-07	6.62145e-07	1.36578e-06	366091	0.502944	3.60484e-06	52712.9	34987.3
4568	82	10	8	1.62	0.7	5.4	4	38	0.1	loamy sand	0.17	13	1.204	1.18086	3.98107e-06	0.00423306	7.38789e-08	0.754212	0.931909	0.799689	-6.77176	-8.23451	1209.51	2.66652e-08	1.2908e-07	1.26723e-06	6.92751e-08	1.36359e-06	6.87751e-07	3.67087e-06	136208	0.485004	6.16343e-06	43245.3	17607.9
4569	83	11	6	1.67	0.5	6.6	5	94	0.1	loamy sand	0.17	13	0.86	0.870184	2.51189e-07	0.02764	2.14133e-05	0.530925	0.853608	0.817692	-6.96547	-9.28987	1889.41	3.60088e-09	1.18537e-07	1.26284e-06	1.99644e-08	9.61045e-08	6.23323e-07	1.89114e-06	264390	0.505532	5.04957e-07	66228.8	4469.87
4570	83	11	6	1.67	0.5	6.6	5	94	0.1	loamy sand	0.17	13	0.86	0.870184	2.51189e-07	0.02764	2.14133e-05	0.530925	0.853608	0.817692	-6.96547	-9.28987	1889.41	3.60088e-09	1.18537e-07	1.26284e-06	1.99644e-08	9.61045e-08	6.23323e-07	1.89114e-06	264390	0.505532	5.04957e-07	66228.8	4469.87
4572	34	48	18	1.41	7.37	5.4	35	13	0.1	loam	0.32	23	12.6764	1.92719	3.98107e-06	0.21588	1.75905e-12	0.304049	0.742567	1.04843	-6.31918	-8.94294	754.771	2.66652e-08	1.2908e-07	1.26723e-06	6.92751e-08	1.36359e-06	6.87749e-07	1.71404e-05	29170.9	0.486071	1.47113e-06	27353.6	570.578
4573	42	39	19	1.42	3.43	6.4	27	75	0.1	loam	0.32	23	5.8996	1.5147	3.98107e-07	0.19747	7.48543e-08	0.309912	0.746122	1.03677	-6.55902	-9.65675	1311.19	4.50937e-09	1.18953e-07	1.26301e-06	2.19067e-08	1.4603e-07	6.25307e-07	6.90241e-06	72438.4	0.4732	2.90021e-07	46740.4	464.661
4575	31	49	20	1.39	7	6	29	14	0.1	loam	0.32	23	12.04	1.80886	1e-06	0.19573	6.7052e-15	0.310527	0.746491	1.04009	-6.4114	-9.52979	933.331	8.23128e-09	1.20654e-07	1.26372e-06	2.9864e-08	3.50564e-07	6.35795e-07	9.328e-06	53602.1	0.476827	3.93865e-07	33644.7	338.693
4576	31	49	20	1.39	7	6	29	14	0.1	loam	0.32	23	12.04	1.80886	1e-06	0.19573	6.7052e-15	0.310527	0.746491	1.04009	-6.4114	-9.52979	933.331	8.23128e-09	1.20654e-07	1.26372e-06	2.9864e-08	3.50564e-07	6.35795e-07	9.328e-06	53602.1	0.476827	3.93865e-07	33644.7	338.693
4578	31	49	20	1.39	7	6	29	14	0.1	loam	0.32	23	12.04	1.80886	1e-06	0.19573	6.7052e-15	0.310527	0.746491	1.04009	-6.4114	-9.52979	933.331	8.23128e-09	1.20654e-07	1.26372e-06	2.9864e-08	3.50564e-07	6.35795e-07	9.328e-06	53602.1	0.476827	3.93865e-07	33644.7	338.693
4580	77	19	4	1.71	2.36	5.9	13	36	0.1	loamy sand	0.17	13	4.0592	1.48116	1.25893e-06	0.08199	3.39191e-11	0.393088	0.791813	0.863305	-6.64413	-9.15274	901.549	9.83242e-09	1.21386e-07	1.26403e-06	3.32872e-08	4.38553e-07	6.40308e-07	4.27162e-06	117052	0.561515	6.08835e-07	32529.8	1301.73
4591	46	43	11	1.51	4.38	5.9	24	57	0.1	loam	0.32	23	7.5336	1.67721	1.25893e-06	0.16146	2.26376e-12	0.325206	0.755161	1.0798	-6.43455	-9.21639	984.446	9.83242e-09	1.21386e-07	1.26403e-06	3.32872e-08	4.38553e-07	6.40308e-07	9.71909e-06	51445.1	0.522487	6.80871e-07	95784.2	1752.99
4592	53	22	25	1.4	0.98	5.1	6	49	0.1	sandy clay loam	0.16	13	1.6856	1.33853	7.94328e-06	0.00980092	2.2481e-07	0.663032	0.902368	0.71843	-6.73686	-8.13038	1116.14	5.11662e-08	1.40279e-07	1.2719e-06	1.21657e-07	2.71002e-06	7.56808e-07	5.56239e-06	89889.5	0.402242	1.02864e-05	107465	39969.4
4593	53	22	25	1.4	0.98	5.1	6	49	0.1	sandy clay loam	0.16	13	1.6856	1.33853	7.94328e-06	0.00980092	2.2481e-07	0.663032	0.902368	0.71843	-6.73686	-8.13038	1116.14	5.11662e-08	1.40279e-07	1.2719e-06	1.21657e-07	2.71002e-06	7.56808e-07	5.56239e-06	89889.5	0.402242	1.02864e-05	107465	39969.4
4594	53	22	25	1.4	0.98	5.1	6	49	0.1	sandy clay loam	0.16	13	1.6856	1.33853	7.94328e-06	0.00980092	2.2481e-07	0.663032	0.902368	0.71843	-6.73686	-8.13038	1116.14	5.11662e-08	1.40279e-07	1.2719e-06	1.21657e-07	2.71002e-06	7.56808e-07	5.56239e-06	89889.5	0.402242	1.02864e-05	107465	39969.4
4595	78	12	10	1.58	0.61	6.2	4	72	0.1	sandy loam	0.2	13	1.0492	1.00123	6.30957e-07	0.01159	1.56676e-10	0.64279	0.8954	0.781742	-6.9077	-8.99585	1654.06	5.94924e-09	1.19611e-07	1.26329e-06	2.49851e-08	2.25157e-07	6.29363e-07	2.398e-06	208507	0.465371	1.34235e-06	152752	19896.2
4596	78	12	10	1.58	0.61	6.2	4	72	0.1	sandy loam	0.2	13	1.0492	1.00123	6.30957e-07	0.01159	1.56676e-10	0.64279	0.8954	0.781742	-6.9077	-8.99585	1654.06	5.94924e-09	1.19611e-07	1.26329e-06	2.49851e-08	2.25157e-07	6.29363e-07	2.398e-06	208507	0.465371	1.34235e-06	152752	19896.2
4597	53	22	25	1.4	0.98	5.1	6	49	0.1	sandy clay loam	0.16	13	1.6856	1.33853	7.94328e-06	0.00980092	2.2481e-07	0.663032	0.902368	0.71843	-6.73686	-8.13038	1116.14	5.11662e-08	1.40279e-07	1.2719e-06	1.21657e-07	2.71002e-06	7.56808e-07	5.56239e-06	89889.5	0.402242	1.02864e-05	107465	39969.4
4598	53	22	25	1.4	0.98	5.1	6	49	0.1	sandy clay loam	0.16	13	1.6856	1.33853	7.94328e-06	0.00980092	2.2481e-07	0.663032	0.902368	0.71843	-6.73686	-8.13038	1116.14	5.11662e-08	1.40279e-07	1.2719e-06	1.21657e-07	2.71002e-06	7.56808e-07	5.56239e-06	89889.5	0.402242	1.02864e-05	107465	39969.4
4599	53	22	25	1.4	0.98	5.1	6	49	0.1	sandy clay loam	0.16	13	1.6856	1.33853	7.94328e-06	0.00980092	2.2481e-07	0.663032	0.902368	0.71843	-6.73686	-8.13038	1116.14	5.11662e-08	1.40279e-07	1.2719e-06	1.21657e-07	2.71002e-06	7.56808e-07	5.56239e-06	89889.5	0.402242	1.02864e-05	107465	39969.4
4600	76	14	10	1.58	0.72	5.4	5	64	0.1	sandy loam	0.2	13	1.2384	1.18979	3.98107e-06	0.00887586	2.49959e-06	0.674715	0.906317	0.783399	-6.7779	-8.25859	1226.75	2.66652e-08	1.2908e-07	1.26723e-06	6.92751e-08	1.36359e-06	6.87817e-07	4.82759e-06	103571	0.467149	7.30244e-06	117089	41369.2
4601	34	43	23	1.38	0.83	4.9	7	30	0.1	loam	0.32	23	1.4276	1.31986	1.25893e-05	0.00981081	3.54799e-06	0.662912	0.902327	1.00841	-6.55742	-7.63129	1306.36	7.98957e-08	1.53411e-07	1.27738e-06	1.8308e-07	4.28882e-06	8.37869e-07	1.43084e-05	34944.5	0.443285	3.378e-05	123913	64839.2
4602	34	43	23	1.38	0.83	4.9	7	30	0.1	loam	0.32	23	1.4276	1.31986	1.25893e-05	0.00981081	3.54799e-06	0.662912	0.902327	1.00841	-6.55742	-7.63129	1306.36	7.98957e-08	1.53411e-07	1.27738e-06	1.8308e-07	4.28882e-06	8.37869e-07	1.43084e-05	34944.5	0.443285	3.378e-05	123913	64839.2
4603	46	30	24	1.39	1.73	5	9	27	0.1	loam	0.32	23	2.9756	1.53571	1e-05	0.02371	8.80148e-08	0.551181	0.861635	1.01259	-6.47371	-8.01179	1077.33	6.38843e-08	1.46092e-07	1.27433e-06	1.48848e-07	3.40893e-06	7.92649e-07	1.51438e-05	33016.8	0.447568	1.38309e-05	104048	21265.5
4604	49	27	24	1.4	1	4.6	7	44	0.1	sandy clay loam	0.16	13	1.72	1.42994	2.51189e-05	0.0091147	2.11533e-05	0.671608	0.905272	0.721664	-6.66517	-7.63557	946.295	1.57375e-07	1.88826e-07	1.29214e-06	3.48727e-07	8.5466e-06	1.05671e-06	1.06459e-05	46966.4	0.405248	3.19038e-05	92354.3	56079.9
4605	49	27	24	1.4	1	4.6	7	44	0.1	sandy clay loam	0.16	13	1.72	1.42994	2.51189e-05	0.0091147	2.11533e-05	0.671608	0.905272	0.721664	-6.66517	-7.63557	946.295	1.57375e-07	1.88826e-07	1.29214e-06	3.48727e-07	8.5466e-06	1.05671e-06	1.06459e-05	46966.4	0.405248	3.19038e-05	92354.3	56079.9
4606	49	27	24	1.4	1	4.6	7	44	0.1	sandy clay loam	0.16	13	1.72	1.42994	2.51189e-05	0.0091147	2.11533e-05	0.671608	0.905272	0.721664	-6.66517	-7.63557	946.295	1.57375e-07	1.88826e-07	1.29214e-06	3.48727e-07	8.5466e-06	1.05671e-06	1.06459e-05	46966.4	0.405248	3.19038e-05	92354.3	56079.9
4607	49	27	24	1.4	1	4.6	7	44	0.1	sandy clay loam	0.16	13	1.72	1.42994	2.51189e-05	0.0091147	2.11533e-05	0.671608	0.905272	0.721664	-6.66517	-7.63557	946.295	1.57375e-07	1.88826e-07	1.29214e-06	3.48727e-07	8.5466e-06	1.05671e-06	1.06459e-05	46966.4	0.405248	3.19038e-05	92354.3	56079.9
4608	49	27	24	1.4	1	4.6	7	44	0.1	sandy clay loam	0.16	13	1.72	1.42994	2.51189e-05	0.0091147	2.11533e-05	0.671608	0.905272	0.721664	-6.66517	-7.63557	946.295	1.57375e-07	1.88826e-07	1.29214e-06	3.48727e-07	8.5466e-06	1.05671e-06	1.06459e-05	46966.4	0.405248	3.19038e-05	92354.3	56079.9
4609	49	27	24	1.4	1	4.6	7	44	0.1	sandy clay loam	0.16	13	1.72	1.42994	2.51189e-05	0.0091147	2.11533e-05	0.671608	0.905272	0.721664	-6.66517	-7.63557	946.295	1.57375e-07	1.88826e-07	1.29214e-06	3.48727e-07	8.5466e-06	1.05671e-06	1.06459e-05	46966.4	0.405248	3.19038e-05	92354.3	56079.9
4610	49	27	24	1.4	1	4.6	7	44	0.1	sandy clay loam	0.16	13	1.72	1.42994	2.51189e-05	0.0091147	2.11533e-05	0.671608	0.905272	0.721664	-6.66517	-7.63557	946.295	1.57375e-07	1.88826e-07	1.29214e-06	3.48727e-07	8.5466e-06	1.05671e-06	1.06459e-05	46966.4	0.405248	3.19038e-05	92354.3	56079.9
4611	49	27	24	1.4	1	4.6	7	44	0.1	sandy clay loam	0.16	13	1.72	1.42994	2.51189e-05	0.0091147	2.11533e-05	0.671608	0.905272	0.721664	-6.66517	-7.63557	946.295	1.57375e-07	1.88826e-07	1.29214e-06	3.48727e-07	8.5466e-06	1.05671e-06	1.06459e-05	46966.4	0.405248	3.19038e-05	92354.3	56079.9
4612	81	9	10	1.59	0.55	5.5	4	68	0.1	loamy sand	0.17	13	0.946	1.0874	3.16228e-06	0.00505528	3.57032e-06	0.736475	0.926381	0.780708	-6.82765	-8.25667	1375.64	2.16021e-08	1.26766e-07	1.26627e-06	5.84503e-08	1.08535e-06	6.73576e-07	3.37422e-06	148182	0.464264	6.23392e-06	129783	55659.6
4613	49	27	24	1.4	1	4.6	7	44	0.1	sandy clay loam	0.16	13	1.72	1.42994	2.51189e-05	0.0091147	2.11533e-05	0.671608	0.905272	0.721664	-6.66517	-7.63557	946.295	1.57375e-07	1.88826e-07	1.29214e-06	3.48727e-07	8.5466e-06	1.05671e-06	1.06459e-05	46966.4	0.405248	3.19038e-05	92354.3	56079.9
4614	49	27	24	1.4	1	4.6	7	44	0.1	sandy clay loam	0.16	13	1.72	1.42994	2.51189e-05	0.0091147	2.11533e-05	0.671608	0.905272	0.721664	-6.66517	-7.63557	946.295	1.57375e-07	1.88826e-07	1.29214e-06	3.48727e-07	8.5466e-06	1.05671e-06	1.06459e-05	46966.4	0.405248	3.19038e-05	92354.3	56079.9
4615	49	27	24	1.4	1	4.6	7	44	0.1	sandy clay loam	0.16	13	1.72	1.42994	2.51189e-05	0.0091147	2.11533e-05	0.671608	0.905272	0.721664	-6.66517	-7.63557	946.295	1.57375e-07	1.88826e-07	1.29214e-06	3.48727e-07	8.5466e-06	1.05671e-06	1.06459e-05	46966.4	0.405248	3.19038e-05	92354.3	56079.9
4616	49	27	24	1.4	1	4.6	7	44	0.1	sandy clay loam	0.16	13	1.72	1.42994	2.51189e-05	0.0091147	2.11533e-05	0.671608	0.905272	0.721664	-6.66517	-7.63557	946.295	1.57375e-07	1.88826e-07	1.29214e-06	3.48727e-07	8.5466e-06	1.05671e-06	1.06459e-05	46966.4	0.405248	3.19038e-05	92354.3	56079.9
4617	49	27	24	1.4	1	4.6	7	44	0.1	sandy clay loam	0.16	13	1.72	1.42994	2.51189e-05	0.0091147	2.11533e-05	0.671608	0.905272	0.721664	-6.66517	-7.63557	946.295	1.57375e-07	1.88826e-07	1.29214e-06	3.48727e-07	8.5466e-06	1.05671e-06	1.06459e-05	46966.4	0.405248	3.19038e-05	92354.3	56079.9
4618	49	27	24	1.4	1	4.6	7	44	0.1	sandy clay loam	0.16	13	1.72	1.42994	2.51189e-05	0.0091147	2.11533e-05	0.671608	0.905272	0.721664	-6.66517	-7.63557	946.295	1.57375e-07	1.88826e-07	1.29214e-06	3.48727e-07	8.5466e-06	1.05671e-06	1.06459e-05	46966.4	0.405248	3.19038e-05	92354.3	56079.9
4620	49	27	24	1.4	1	4.6	7	44	0.1	sandy clay loam	0.16	13	1.72	1.42994	2.51189e-05	0.0091147	2.11533e-05	0.671608	0.905272	0.721664	-6.66517	-7.63557	946.295	1.57375e-07	1.88826e-07	1.29214e-06	3.48727e-07	8.5466e-06	1.05671e-06	1.06459e-05	46966.4	0.405248	3.19038e-05	92354.3	56079.9
4621	49	27	24	1.4	1	4.6	7	44	0.1	sandy clay loam	0.16	13	1.72	1.42994	2.51189e-05	0.0091147	2.11533e-05	0.671608	0.905272	0.721664	-6.66517	-7.63557	946.295	1.57375e-07	1.88826e-07	1.29214e-06	3.48727e-07	8.5466e-06	1.05671e-06	1.06459e-05	46966.4	0.405248	3.19038e-05	92354.3	56079.9
4622	77	12	11	1.57	0.56	5.2	3	59	0.1	sandy loam	0.2	13	0.9632	1.14411	6.30957e-06	0.000462305	1.18022e-07	0.9061	0.97565	0.77381	-6.78918	-7.96922	1259.02	4.10639e-08	1.35661e-07	1.26998e-06	1.00059e-07	2.15485e-06	7.28333e-07	4.514e-06	110767	0.456948	1.4628e-05	119865	88746.8
4623	47	30	23	1.4	1.13	4.8	6	54	0.1	loam	0.32	23	1.9436	1.43468	1.58489e-05	0.00658977	4.9024e-07	0.708402	0.917424	1.01149	-6.50239	-7.64805	1150.87	1.00052e-07	1.62624e-07	1.28122e-06	2.26173e-07	5.39649e-06	8.94594e-07	1.52813e-05	32719.7	0.446442	3.18101e-05	110504	51347.5
4624	41	39	20	1.41	1.45	5.1	12	37	0.1	loam	0.32	23	2.494	1.46273	7.94328e-06	0.04062	7.41018e-06	0.480209	0.832449	1.02436	-6.50282	-8.03401	1152.03	5.11662e-08	1.40279e-07	1.2719e-06	1.21657e-07	2.71002e-06	7.57002e-07	1.53608e-05	32550.4	0.45987	1.26081e-05	110606	20874.7
4628	75	15	10	1.58	0.7	5.2	5	22	0.1	sandy loam	0.2	13	1.204	1.21486	6.30957e-06	0.00666149	3.77644e-07	0.707217	0.91704	0.783117	-6.75484	-8.04793	1163.31	4.10639e-08	1.35661e-07	1.26998e-06	1.00059e-07	2.15485e-06	7.2834e-07	5.78343e-06	86453.8	0.466846	1.18689e-05	111589	53455.1
4629	41	39	20	1.41	1.45	5.1	12	37	0.1	loam	0.32	23	2.494	1.46273	7.94328e-06	0.04062	7.41018e-06	0.480209	0.832449	1.02436	-6.50282	-8.03401	1152.03	5.11662e-08	1.40279e-07	1.2719e-06	1.21657e-07	2.71002e-06	7.57002e-07	1.53608e-05	32550.4	0.45987	1.26081e-05	110606	20874.7
4630	41	39	20	1.41	1.45	5.1	12	37	0.1	loam	0.32	23	2.494	1.46273	7.94328e-06	0.04062	7.41018e-06	0.480209	0.832449	1.02436	-6.50282	-8.03401	1152.03	5.11662e-08	1.40279e-07	1.2719e-06	1.21657e-07	2.71002e-06	7.57002e-07	1.53608e-05	32550.4	0.45987	1.26081e-05	110606	20874.7
4631	75	15	10	1.58	0.7	5.2	5	22	0.1	sandy loam	0.2	13	1.204	1.21486	6.30957e-06	0.00666149	3.77644e-07	0.707217	0.91704	0.783117	-6.75484	-8.04793	1163.31	4.10639e-08	1.35661e-07	1.26998e-06	1.00059e-07	2.15485e-06	7.2834e-07	5.78343e-06	86453.8	0.466846	1.18689e-05	111589	53455.1
4632	41	39	20	1.41	1.45	5.1	12	37	0.1	loam	0.32	23	2.494	1.46273	7.94328e-06	0.04062	7.41018e-06	0.480209	0.832449	1.02436	-6.50282	-8.03401	1152.03	5.11662e-08	1.40279e-07	1.2719e-06	1.21657e-07	2.71002e-06	7.57002e-07	1.53608e-05	32550.4	0.45987	1.26081e-05	110606	20874.7
4633	41	39	20	1.41	1.45	5.1	12	37	0.1	loam	0.32	23	2.494	1.46273	7.94328e-06	0.04062	7.41018e-06	0.480209	0.832449	1.02436	-6.50282	-8.03401	1152.03	5.11662e-08	1.40279e-07	1.2719e-06	1.21657e-07	2.71002e-06	7.57002e-07	1.53608e-05	32550.4	0.45987	1.26081e-05	110606	20874.7
4634	41	39	20	1.41	1.45	5.1	12	37	0.1	loam	0.32	23	2.494	1.46273	7.94328e-06	0.04062	7.41018e-06	0.480209	0.832449	1.02436	-6.50282	-8.03401	1152.03	5.11662e-08	1.40279e-07	1.2719e-06	1.21657e-07	2.71002e-06	7.57002e-07	1.53608e-05	32550.4	0.45987	1.26081e-05	110606	20874.7
4635	41	39	20	1.41	1.45	5.1	12	37	0.1	loam	0.32	23	2.494	1.46273	7.94328e-06	0.04062	7.41018e-06	0.480209	0.832449	1.02436	-6.50282	-8.03401	1152.03	5.11662e-08	1.40279e-07	1.2719e-06	1.21657e-07	2.71002e-06	7.57002e-07	1.53608e-05	32550.4	0.45987	1.26081e-05	110606	20874.7
4636	41	39	20	1.41	1.45	5.1	12	37	0.1	loam	0.32	23	2.494	1.46273	7.94328e-06	0.04062	7.41018e-06	0.480209	0.832449	1.02436	-6.50282	-8.03401	1152.03	5.11662e-08	1.40279e-07	1.2719e-06	1.21657e-07	2.71002e-06	7.57002e-07	1.53608e-05	32550.4	0.45987	1.26081e-05	110606	20874.7
4637	41	39	20	1.41	1.45	5.1	12	37	0.1	loam	0.32	23	2.494	1.46273	7.94328e-06	0.04062	7.41018e-06	0.480209	0.832449	1.02436	-6.50282	-8.03401	1152.03	5.11662e-08	1.40279e-07	1.2719e-06	1.21657e-07	2.71002e-06	7.57002e-07	1.53608e-05	32550.4	0.45987	1.26081e-05	110606	20874.7
4638	41	39	20	1.41	1.45	5.1	12	37	0.1	loam	0.32	23	2.494	1.46273	7.94328e-06	0.04062	7.41018e-06	0.480209	0.832449	1.02436	-6.50282	-8.03401	1152.03	5.11662e-08	1.40279e-07	1.2719e-06	1.21657e-07	2.71002e-06	7.57002e-07	1.53608e-05	32550.4	0.45987	1.26081e-05	110606	20874.7
4639	41	39	20	1.41	1.45	5.1	12	37	0.1	loam	0.32	23	2.494	1.46273	7.94328e-06	0.04062	7.41018e-06	0.480209	0.832449	1.02436	-6.50282	-8.03401	1152.03	5.11662e-08	1.40279e-07	1.2719e-06	1.21657e-07	2.71002e-06	7.57002e-07	1.53608e-05	32550.4	0.45987	1.26081e-05	110606	20874.7
4640	41	39	20	1.41	1.45	5.1	12	37	0.1	loam	0.32	23	2.494	1.46273	7.94328e-06	0.04062	7.41018e-06	0.480209	0.832449	1.02436	-6.50282	-8.03401	1152.03	5.11662e-08	1.40279e-07	1.2719e-06	1.21657e-07	2.71002e-06	7.57002e-07	1.53608e-05	32550.4	0.45987	1.26081e-05	110606	20874.7
4641	41	39	20	1.41	1.45	5.1	12	37	0.1	loam	0.32	23	2.494	1.46273	7.94328e-06	0.04062	7.41018e-06	0.480209	0.832449	1.02436	-6.50282	-8.03401	1152.03	5.11662e-08	1.40279e-07	1.2719e-06	1.21657e-07	2.71002e-06	7.57002e-07	1.53608e-05	32550.4	0.45987	1.26081e-05	110606	20874.7
4642	41	39	20	1.41	1.45	5.1	12	37	0.1	loam	0.32	23	2.494	1.46273	7.94328e-06	0.04062	7.41018e-06	0.480209	0.832449	1.02436	-6.50282	-8.03401	1152.03	5.11662e-08	1.40279e-07	1.2719e-06	1.21657e-07	2.71002e-06	7.57002e-07	1.53608e-05	32550.4	0.45987	1.26081e-05	110606	20874.7
4643	75	15	10	1.58	0.7	5.2	5	22	0.1	sandy loam	0.2	13	1.204	1.21486	6.30957e-06	0.00666149	3.77644e-07	0.707217	0.91704	0.783117	-6.75484	-8.04793	1163.31	4.10639e-08	1.35661e-07	1.26998e-06	1.00059e-07	2.15485e-06	7.2834e-07	5.78343e-06	86453.8	0.466846	1.18689e-05	111589	53455.1
4644	41	39	20	1.41	1.45	5.1	12	37	0.1	loam	0.32	23	2.494	1.46273	7.94328e-06	0.04062	7.41018e-06	0.480209	0.832449	1.02436	-6.50282	-8.03401	1152.03	5.11662e-08	1.40279e-07	1.2719e-06	1.21657e-07	2.71002e-06	7.57002e-07	1.53608e-05	32550.4	0.45987	1.26081e-05	110606	20874.7
4645	41	39	20	1.41	1.45	5.1	12	37	0.1	loam	0.32	23	2.494	1.46273	7.94328e-06	0.04062	7.41018e-06	0.480209	0.832449	1.02436	-6.50282	-8.03401	1152.03	5.11662e-08	1.40279e-07	1.2719e-06	1.21657e-07	2.71002e-06	7.57002e-07	1.53608e-05	32550.4	0.45987	1.26081e-05	110606	20874.7
4646	41	39	20	1.41	1.45	5.1	12	37	0.1	loam	0.32	23	2.494	1.46273	7.94328e-06	0.04062	7.41018e-06	0.480209	0.832449	1.02436	-6.50282	-8.03401	1152.03	5.11662e-08	1.40279e-07	1.2719e-06	1.21657e-07	2.71002e-06	7.57002e-07	1.53608e-05	32550.4	0.45987	1.26081e-05	110606	20874.7
4648	42	36	22	1.4	1	6.6	16	93	0.1	loam	0.32	23	1.72	1.08994	2.51189e-07	0.13481	0.000188303	0.34105	0.764195	1.01357	-6.75863	-9.39913	2076.18	3.60088e-09	1.18537e-07	1.26284e-06	1.99644e-08	9.61045e-08	6.27828e-07	5.54833e-06	90117.2	0.448586	5.61577e-07	185782	4217.6
4649	42	36	22	1.4	1	6.6	16	93	0.1	loam	0.32	23	1.72	1.08994	2.51189e-07	0.13481	0.000188303	0.34105	0.764195	1.01357	-6.75863	-9.39913	2076.18	3.60088e-09	1.18537e-07	1.26284e-06	1.99644e-08	9.61045e-08	6.27828e-07	5.54833e-06	90117.2	0.448586	5.61577e-07	185782	4217.6
4650	42	36	22	1.4	1	6.6	16	93	0.1	loam	0.32	23	1.72	1.08994	2.51189e-07	0.13481	0.000188303	0.34105	0.764195	1.01357	-6.75863	-9.39913	2076.18	3.60088e-09	1.18537e-07	1.26284e-06	1.99644e-08	9.61045e-08	6.27828e-07	5.54833e-06	90117.2	0.448586	5.61577e-07	185782	4217.6
4652	42	36	22	1.4	1	6.6	16	93	0.1	loam	0.32	23	1.72	1.08994	2.51189e-07	0.13481	0.000188303	0.34105	0.764195	1.01357	-6.75863	-9.39913	2076.18	3.60088e-09	1.18537e-07	1.26284e-06	1.99644e-08	9.61045e-08	6.27828e-07	5.54833e-06	90117.2	0.448586	5.61577e-07	185782	4217.6
4653	42	36	22	1.4	1	6.6	16	93	0.1	loam	0.32	23	1.72	1.08994	2.51189e-07	0.13481	0.000188303	0.34105	0.764195	1.01357	-6.75863	-9.39913	2076.18	3.60088e-09	1.18537e-07	1.26284e-06	1.99644e-08	9.61045e-08	6.27828e-07	5.54833e-06	90117.2	0.448586	5.61577e-07	185782	4217.6
4654	42	36	22	1.4	1	6.6	16	93	0.1	loam	0.32	23	1.72	1.08994	2.51189e-07	0.13481	0.000188303	0.34105	0.764195	1.01357	-6.75863	-9.39913	2076.18	3.60088e-09	1.18537e-07	1.26284e-06	1.99644e-08	9.61045e-08	6.27828e-07	5.54833e-06	90117.2	0.448586	5.61577e-07	185782	4217.6
4655	42	36	22	1.4	1	6.6	16	93	0.1	loam	0.32	23	1.72	1.08994	2.51189e-07	0.13481	0.000188303	0.34105	0.764195	1.01357	-6.75863	-9.39913	2076.18	3.60088e-09	1.18537e-07	1.26284e-06	1.99644e-08	9.61045e-08	6.27828e-07	5.54833e-06	90117.2	0.448586	5.61577e-07	185782	4217.6
4657	42	36	22	1.4	1	6.6	16	93	0.1	loam	0.32	23	1.72	1.08994	2.51189e-07	0.13481	0.000188303	0.34105	0.764195	1.01357	-6.75863	-9.39913	2076.18	3.60088e-09	1.18537e-07	1.26284e-06	1.99644e-08	9.61045e-08	6.27828e-07	5.54833e-06	90117.2	0.448586	5.61577e-07	185782	4217.6
4658	42	36	22	1.4	1	6.6	16	93	0.1	loam	0.32	23	1.72	1.08994	2.51189e-07	0.13481	0.000188303	0.34105	0.764195	1.01357	-6.75863	-9.39913	2076.18	3.60088e-09	1.18537e-07	1.26284e-06	1.99644e-08	9.61045e-08	6.27828e-07	5.54833e-06	90117.2	0.448586	5.61577e-07	185782	4217.6
4659	42	36	22	1.4	1	6.6	16	93	0.1	loam	0.32	23	1.72	1.08994	2.51189e-07	0.13481	0.000188303	0.34105	0.764195	1.01357	-6.75863	-9.39913	2076.18	3.60088e-09	1.18537e-07	1.26284e-06	1.99644e-08	9.61045e-08	6.27828e-07	5.54833e-06	90117.2	0.448586	5.61577e-07	185782	4217.6
4660	42	36	22	1.4	1	6.6	16	93	0.1	loam	0.32	23	1.72	1.08994	2.51189e-07	0.13481	0.000188303	0.34105	0.764195	1.01357	-6.75863	-9.39913	2076.18	3.60088e-09	1.18537e-07	1.26284e-06	1.99644e-08	9.61045e-08	6.27828e-07	5.54833e-06	90117.2	0.448586	5.61577e-07	185782	4217.6
4661	42	36	22	1.4	1	6.6	16	93	0.1	loam	0.32	23	1.72	1.08994	2.51189e-07	0.13481	0.000188303	0.34105	0.764195	1.01357	-6.75863	-9.39913	2076.18	3.60088e-09	1.18537e-07	1.26284e-06	1.99644e-08	9.61045e-08	6.27828e-07	5.54833e-06	90117.2	0.448586	5.61577e-07	185782	4217.6
4662	41	36	23	1.39	2.72	5.2	21	24	0.1	loam	0.32	23	4.6784	1.64517	6.30957e-06	0.10286	1.93617e-06	0.368018	0.778874	1.02027	-6.43765	-8.38047	991.499	4.10639e-08	1.35661e-07	1.26998e-06	1.00059e-07	2.15485e-06	7.28382e-07	1.77825e-05	28117.5	0.455554	5.81413e-06	96416	7180.41
4663	41	36	23	1.39	2.72	5.2	21	24	0.1	loam	0.32	23	4.6784	1.64517	6.30957e-06	0.10286	1.93617e-06	0.368018	0.778874	1.02027	-6.43765	-8.38047	991.499	4.10639e-08	1.35661e-07	1.26998e-06	1.00059e-07	2.15485e-06	7.28382e-07	1.77825e-05	28117.5	0.455554	5.81413e-06	96416	7180.41
4664	41	36	23	1.39	2.72	5.2	21	24	0.1	loam	0.32	23	4.6784	1.64517	6.30957e-06	0.10286	1.93617e-06	0.368018	0.778874	1.02027	-6.43765	-8.38047	991.499	4.10639e-08	1.35661e-07	1.26998e-06	1.00059e-07	2.15485e-06	7.28382e-07	1.77825e-05	28117.5	0.455554	5.81413e-06	96416	7180.41
4675	72	19	9	1.59	1.14	5.8	8	100	0.1	sandy loam	0.2	13	1.9608	1.26748	1.58489e-06	0.0383	7.70101e-05	0.487899	0.835762	0.795813	-6.76496	-8.82616	1190.73	1.1848e-08	1.22307e-07	1.26441e-06	3.75965e-08	5.4932e-07	6.48067e-07	4.44002e-06	112612	0.480695	1.90875e-06	113973	11776.2
4690	35	54	11	1.49	1.2	5.4	9	55	0.1	silt loam	0.35	23	2.064	1.35174	3.98107e-06	0.02711	2.25303e-06	0.533486	0.854635	1.06687	-6.54199	-8.22643	1260.76	2.66652e-08	1.2908e-07	1.26723e-06	6.92751e-08	1.36359e-06	6.8781e-07	1.06848e-05	46795.6	0.507157	7.59751e-06	120015	21639.9
4691	35	54	11	1.49	1.2	5.4	9	55	0.1	silt loam	0.35	23	2.064	1.35174	3.98107e-06	0.02711	2.25303e-06	0.533486	0.854635	1.06687	-6.54199	-8.22643	1260.76	2.66652e-08	1.2908e-07	1.26723e-06	6.92751e-08	1.36359e-06	6.8781e-07	1.06848e-05	46795.6	0.507157	7.59751e-06	120015	21639.9
4692	35	54	11	1.49	1.2	5.4	9	55	0.1	silt loam	0.35	23	2.064	1.35174	3.98107e-06	0.02711	2.25303e-06	0.533486	0.854635	1.06687	-6.54199	-8.22643	1260.76	2.66652e-08	1.2908e-07	1.26723e-06	6.92751e-08	1.36359e-06	6.8781e-07	1.06848e-05	46795.6	0.507157	7.59751e-06	120015	21639.9
4693	35	54	11	1.49	1.2	5.4	9	55	0.1	silt loam	0.35	23	2.064	1.35174	3.98107e-06	0.02711	2.25303e-06	0.533486	0.854635	1.06687	-6.54199	-8.22643	1260.76	2.66652e-08	1.2908e-07	1.26723e-06	6.92751e-08	1.36359e-06	6.8781e-07	1.06848e-05	46795.6	0.507157	7.59751e-06	120015	21639.9
4698	16	29	55	1.21	1.65	4.7	24	49	0.1	clay (light)	0.2	24	2.838	1.5717	1.99526e-05	0.12575	0.000814518	0.347642	0.767862	0.971821	-6.46398	-7.72651	1099.27	1.25428e-07	1.74223e-07	1.28605e-06	2.80426e-07	6.791e-06	9.88086e-07	2.23977e-05	22323.7	0.39049	2.1038e-05	105982	19436.2
4699	40	39	21	1.4	1.25	5.1	11	47	0.1	loam	0.32	23	2.15	1.41568	7.94328e-06	0.03492	2.48837e-05	0.500038	0.840913	1.01926	-6.52501	-7.98077	1212.42	5.11662e-08	1.40279e-07	1.2719e-06	1.21657e-07	2.71002e-06	7.57474e-07	1.47532e-05	33891	0.454495	1.45238e-05	115851	25917.5
4700	75	15	10	1.58	0.97	5.3	4	57	0.1	sandy loam	0.2	13	1.6684	1.30128	5.01187e-06	0.00326239	7.36004e-11	0.778661	0.939371	0.786376	-6.72428	-8.27138	1084.26	3.30394e-08	1.31993e-07	1.26845e-06	8.29028e-08	1.71387e-06	7.05714e-07	4.67852e-06	106871	0.470362	7.04208e-06	104660	37048.8
4701	40	39	21	1.4	1.25	5.1	11	47	0.1	loam	0.32	23	2.15	1.41568	7.94328e-06	0.03492	2.48837e-05	0.500038	0.840913	1.01926	-6.52501	-7.98077	1212.42	5.11662e-08	1.40279e-07	1.2719e-06	1.21657e-07	2.71002e-06	7.57474e-07	1.47532e-05	33891	0.454495	1.45238e-05	115851	25917.5
4702	75	15	10	1.58	0.97	5.3	4	57	0.1	sandy loam	0.2	13	1.6684	1.30128	5.01187e-06	0.00326239	7.36004e-11	0.778661	0.939371	0.786376	-6.72428	-8.27138	1084.26	3.30394e-08	1.31993e-07	1.26845e-06	8.29028e-08	1.71387e-06	7.05714e-07	4.67852e-06	106871	0.470362	7.04208e-06	104660	37048.8
4703	17	31	52	1.22	1.25	5.8	26	78	0.1	clay (light)	0.2	24	2.15	1.29668	1.58489e-06	0.20066	0.00110869	0.308815	0.74546	0.973213	-6.64665	-8.71807	1674.06	1.1848e-08	1.22307e-07	1.26441e-06	3.75965e-08	5.4932e-07	6.75915e-07	7.06419e-06	70779.6	0.391743	2.12069e-06	154364	9076.8
4704	17	31	52	1.22	1.25	5.8	26	78	0.1	clay (light)	0.2	24	2.15	1.29668	1.58489e-06	0.20066	0.00110869	0.308815	0.74546	0.973213	-6.64665	-8.71807	1674.06	1.1848e-08	1.22307e-07	1.26441e-06	3.75965e-08	5.4932e-07	6.75915e-07	7.06419e-06	70779.6	0.391743	2.12069e-06	154364	9076.8
4705	37	40	23	1.38	1.07	6.2	13	88	0.1	loam	0.32	23	1.8404	1.17939	6.30957e-07	0.08447	0.000241459	0.389683	0.790092	1.01095	-6.69776	-9.02741	1804.69	5.94924e-09	1.19611e-07	1.26329e-06	2.49851e-08	2.25157e-07	6.35881e-07	6.33976e-06	78867.4	0.445882	1.34898e-06	164778	7816.68
4706	17	31	52	1.22	1.25	5.8	26	78	0.1	clay (light)	0.2	24	2.15	1.29668	1.58489e-06	0.20066	0.00110869	0.308815	0.74546	0.973213	-6.64665	-8.71807	1674.06	1.1848e-08	1.22307e-07	1.26441e-06	3.75965e-08	5.4932e-07	6.75915e-07	7.06419e-06	70779.6	0.391743	2.12069e-06	154364	9076.8
4707	37	40	23	1.38	1.07	6.2	13	88	0.1	loam	0.32	23	1.8404	1.17939	6.30957e-07	0.08447	0.000241459	0.389683	0.790092	1.01095	-6.69776	-9.02741	1804.69	5.94924e-09	1.19611e-07	1.26329e-06	2.49851e-08	2.25157e-07	6.35881e-07	6.33976e-06	78867.4	0.445882	1.34898e-06	164778	7816.68
4708	17	31	52	1.22	1.25	5.8	26	78	0.1	clay (light)	0.2	24	2.15	1.29668	1.58489e-06	0.20066	0.00110869	0.308815	0.74546	0.973213	-6.64665	-8.71807	1674.06	1.1848e-08	1.22307e-07	1.26441e-06	3.75965e-08	5.4932e-07	6.75915e-07	7.06419e-06	70779.6	0.391743	2.12069e-06	154364	9076.8
4710	17	31	52	1.22	1.25	5.8	26	78	0.1	clay (light)	0.2	24	2.15	1.29668	1.58489e-06	0.20066	0.00110869	0.308815	0.74546	0.973213	-6.64665	-8.71807	1674.06	1.1848e-08	1.22307e-07	1.26441e-06	3.75965e-08	5.4932e-07	6.75915e-07	7.06419e-06	70779.6	0.391743	2.12069e-06	154364	9076.8
4711	82	12	6	1.67	0.68	5.4	6	75	0.1	loamy sand	0.17	13	1.1696	1.17167	3.98107e-06	0.02217	0.000331794	0.560018	0.865069	0.820764	-6.76285	-8.20624	1184.95	2.66652e-08	1.2908e-07	1.26723e-06	6.92751e-08	1.36359e-06	6.96705e-07	4.95446e-06	100919	0.50912	6.07884e-06	113472	35440.7
4713	38	40	22	1.39	1.74	6.5	17	87	0.1	loam	0.32	23	2.9928	1.28254	3.16228e-07	0.11605	5.97311e-05	0.355554	0.772194	1.01911	-6.67051	-9.50873	1694.9	4.00306e-09	1.18721e-07	1.26292e-06	2.08242e-08	1.18206e-07	6.25491e-07	5.64443e-06	88582.9	0.454337	4.33893e-07	156040	2724.87
4714	15	30	55	1.21	2.19	6.3	32	87	0.1	clay (light)	0.2	24	3.7668	1.38946	5.01187e-07	0.23636	0.000571605	0.298717	0.73929	0.974649	-6.64068	-9.43365	1651.22	5.14678e-09	1.19244e-07	1.26313e-06	2.32695e-08	1.81058e-07	6.42531e-07	4.81407e-06	103862	0.393041	4.10235e-07	152522	2554.23
4715	38	40	22	1.39	1.74	6.5	17	87	0.1	loam	0.32	23	2.9928	1.28254	3.16228e-07	0.11605	5.97311e-05	0.355554	0.772194	1.01911	-6.67051	-9.50873	1694.9	4.00306e-09	1.18721e-07	1.26292e-06	2.08242e-08	1.18206e-07	6.25491e-07	5.64443e-06	88582.9	0.454337	4.33893e-07	156040	2724.87
4716	38	40	22	1.39	1.74	6.5	17	87	0.1	loam	0.32	23	2.9928	1.28254	3.16228e-07	0.11605	5.97311e-05	0.355554	0.772194	1.01911	-6.67051	-9.50873	1694.9	4.00306e-09	1.18721e-07	1.26292e-06	2.08242e-08	1.18206e-07	6.25491e-07	5.64443e-06	88582.9	0.454337	4.33893e-07	156040	2724.87
4717	15	30	55	1.21	2.19	6.3	32	87	0.1	clay (light)	0.2	24	3.7668	1.38946	5.01187e-07	0.23636	0.000571605	0.298717	0.73929	0.974649	-6.64068	-9.43365	1651.22	5.14678e-09	1.19244e-07	1.26313e-06	2.32695e-08	1.81058e-07	6.42531e-07	4.81407e-06	103862	0.393041	4.10235e-07	152522	2554.23
4718	77	11	12	1.55	0.97	6.3	11	87	0.1	sandy loam	0.2	13	1.6684	1.13128	5.01187e-07	0.07977	0.000195314	0.396252	0.793401	0.772836	-6.8667	-9.28235	1505.08	5.14678e-09	1.19244e-07	1.26313e-06	2.32695e-08	1.81058e-07	6.32374e-07	3.61948e-06	138141	0.455924	7.22103e-07	140583	6393.63
4720	77	11	12	1.55	0.97	6.3	11	87	0.1	sandy loam	0.2	13	1.6684	1.13128	5.01187e-07	0.07977	0.000195314	0.396252	0.793401	0.772836	-6.8667	-9.28235	1505.08	5.14678e-09	1.19244e-07	1.26313e-06	2.32695e-08	1.81058e-07	6.32374e-07	3.61948e-06	138141	0.455924	7.22103e-07	140583	6393.63
4722	39	38	23	1.38	1.83	6.4	18	87	0.1	loam	0.32	23	3.1476	1.31553	3.98107e-07	0.12189	9.85744e-05	0.350677	0.769532	1.01631	-6.65226	-9.43049	1625.16	4.50937e-09	1.18953e-07	1.26301e-06	2.19067e-08	1.4603e-07	6.27966e-07	6.10435e-06	81908.8	0.45142	5.26693e-07	150412	2929.22
4723	39	38	23	1.38	1.83	6.4	18	87	0.1	loam	0.32	23	3.1476	1.31553	3.98107e-07	0.12189	9.85744e-05	0.350677	0.769532	1.01631	-6.65226	-9.43049	1625.16	4.50937e-09	1.18953e-07	1.26301e-06	2.19067e-08	1.4603e-07	6.27966e-07	6.10435e-06	81908.8	0.45142	5.26693e-07	150412	2929.22
4724	39	38	23	1.38	1.83	6.4	18	87	0.1	loam	0.32	23	3.1476	1.31553	3.98107e-07	0.12189	9.85744e-05	0.350677	0.769532	1.01631	-6.65226	-9.43049	1625.16	4.50937e-09	1.18953e-07	1.26301e-06	2.19067e-08	1.4603e-07	6.27966e-07	6.10435e-06	81908.8	0.45142	5.26693e-07	150412	2929.22
4725	39	38	23	1.38	1.83	6.4	18	87	0.1	loam	0.32	23	3.1476	1.31553	3.98107e-07	0.12189	9.85744e-05	0.350677	0.769532	1.01631	-6.65226	-9.43049	1625.16	4.50937e-09	1.18953e-07	1.26301e-06	2.19067e-08	1.4603e-07	6.27966e-07	6.10435e-06	81908.8	0.45142	5.26693e-07	150412	2929.22
4726	39	38	23	1.38	1.83	6.4	18	87	0.1	loam	0.32	23	3.1476	1.31553	3.98107e-07	0.12189	9.85744e-05	0.350677	0.769532	1.01631	-6.65226	-9.43049	1625.16	4.50937e-09	1.18953e-07	1.26301e-06	2.19067e-08	1.4603e-07	6.27966e-07	6.10435e-06	81908.8	0.45142	5.26693e-07	150412	2929.22
4727	39	38	23	1.38	1.83	6.4	18	87	0.1	loam	0.32	23	3.1476	1.31553	3.98107e-07	0.12189	9.85744e-05	0.350677	0.769532	1.01631	-6.65226	-9.43049	1625.16	4.50937e-09	1.18953e-07	1.26301e-06	2.19067e-08	1.4603e-07	6.27966e-07	6.10435e-06	81908.8	0.45142	5.26693e-07	150412	2929.22
4728	39	38	23	1.38	1.83	6.4	18	87	0.1	loam	0.32	23	3.1476	1.31553	3.98107e-07	0.12189	9.85744e-05	0.350677	0.769532	1.01631	-6.65226	-9.43049	1625.16	4.50937e-09	1.18953e-07	1.26301e-06	2.19067e-08	1.4603e-07	6.27966e-07	6.10435e-06	81908.8	0.45142	5.26693e-07	150412	2929.22
4729	39	38	23	1.38	1.83	6.4	18	87	0.1	loam	0.32	23	3.1476	1.31553	3.98107e-07	0.12189	9.85744e-05	0.350677	0.769532	1.01631	-6.65226	-9.43049	1625.16	4.50937e-09	1.18953e-07	1.26301e-06	2.19067e-08	1.4603e-07	6.27966e-07	6.10435e-06	81908.8	0.45142	5.26693e-07	150412	2929.22
4730	35	41	24	1.37	1.68	6.2	19	87	0.1	loam	0.32	23	2.8896	1.32241	6.30957e-07	0.13259	0.000298876	0.3426	0.765062	1.01229	-6.63882	-9.20069	1575.67	5.94924e-09	1.19611e-07	1.26329e-06	2.49851e-08	2.25157e-07	6.37431e-07	7.21394e-06	69310.2	0.447266	9.08939e-07	146383	4124.66
4731	35	41	24	1.37	1.68	6.2	19	87	0.1	loam	0.32	23	2.8896	1.32241	6.30957e-07	0.13259	0.000298876	0.3426	0.765062	1.01229	-6.63882	-9.20069	1575.67	5.94924e-09	1.19611e-07	1.26329e-06	2.49851e-08	2.25157e-07	6.37431e-07	7.21394e-06	69310.2	0.447266	9.08939e-07	146383	4124.66
4732	35	41	24	1.37	1.68	6.2	19	87	0.1	loam	0.32	23	2.8896	1.32241	6.30957e-07	0.13259	0.000298876	0.3426	0.765062	1.01229	-6.63882	-9.20069	1575.67	5.94924e-09	1.19611e-07	1.26329e-06	2.49851e-08	2.25157e-07	6.37431e-07	7.21394e-06	69310.2	0.447266	9.08939e-07	146383	4124.66
4733	35	41	24	1.37	1.68	6.2	19	87	0.1	loam	0.32	23	2.8896	1.32241	6.30957e-07	0.13259	0.000298876	0.3426	0.765062	1.01229	-6.63882	-9.20069	1575.67	5.94924e-09	1.19611e-07	1.26329e-06	2.49851e-08	2.25157e-07	6.37431e-07	7.21394e-06	69310.2	0.447266	9.08939e-07	146383	4124.66
4734	35	41	24	1.37	1.68	6.2	19	87	0.1	loam	0.32	23	2.8896	1.32241	6.30957e-07	0.13259	0.000298876	0.3426	0.765062	1.01229	-6.63882	-9.20069	1575.67	5.94924e-09	1.19611e-07	1.26329e-06	2.49851e-08	2.25157e-07	6.37431e-07	7.21394e-06	69310.2	0.447266	9.08939e-07	146383	4124.66
4735	35	41	24	1.37	1.68	6.2	19	87	0.1	loam	0.32	23	2.8896	1.32241	6.30957e-07	0.13259	0.000298876	0.3426	0.765062	1.01229	-6.63882	-9.20069	1575.67	5.94924e-09	1.19611e-07	1.26329e-06	2.49851e-08	2.25157e-07	6.37431e-07	7.21394e-06	69310.2	0.447266	9.08939e-07	146383	4124.66
4736	35	41	24	1.37	1.68	6.2	19	87	0.1	loam	0.32	23	2.8896	1.32241	6.30957e-07	0.13259	0.000298876	0.3426	0.765062	1.01229	-6.63882	-9.20069	1575.67	5.94924e-09	1.19611e-07	1.26329e-06	2.49851e-08	2.25157e-07	6.37431e-07	7.21394e-06	69310.2	0.447266	9.08939e-07	146383	4124.66
4737	35	41	24	1.37	1.68	6.2	19	87	0.1	loam	0.32	23	2.8896	1.32241	6.30957e-07	0.13259	0.000298876	0.3426	0.765062	1.01229	-6.63882	-9.20069	1575.67	5.94924e-09	1.19611e-07	1.26329e-06	2.49851e-08	2.25157e-07	6.37431e-07	7.21394e-06	69310.2	0.447266	9.08939e-07	146383	4124.66
4738	35	41	24	1.37	1.68	6.2	19	87	0.1	loam	0.32	23	2.8896	1.32241	6.30957e-07	0.13259	0.000298876	0.3426	0.765062	1.01229	-6.63882	-9.20069	1575.67	5.94924e-09	1.19611e-07	1.26329e-06	2.49851e-08	2.25157e-07	6.37431e-07	7.21394e-06	69310.2	0.447266	9.08939e-07	146383	4124.66
4739	35	41	24	1.37	1.68	6.2	19	87	0.1	loam	0.32	23	2.8896	1.32241	6.30957e-07	0.13259	0.000298876	0.3426	0.765062	1.01229	-6.63882	-9.20069	1575.67	5.94924e-09	1.19611e-07	1.26329e-06	2.49851e-08	2.25157e-07	6.37431e-07	7.21394e-06	69310.2	0.447266	9.08939e-07	146383	4124.66
4740	35	41	24	1.37	1.68	6.2	19	87	0.1	loam	0.32	23	2.8896	1.32241	6.30957e-07	0.13259	0.000298876	0.3426	0.765062	1.01229	-6.63882	-9.20069	1575.67	5.94924e-09	1.19611e-07	1.26329e-06	2.49851e-08	2.25157e-07	6.37431e-07	7.21394e-06	69310.2	0.447266	9.08939e-07	146383	4124.66
4741	35	41	24	1.37	1.68	6.2	19	87	0.1	loam	0.32	23	2.8896	1.32241	6.30957e-07	0.13259	0.000298876	0.3426	0.765062	1.01229	-6.63882	-9.20069	1575.67	5.94924e-09	1.19611e-07	1.26329e-06	2.49851e-08	2.25157e-07	6.37431e-07	7.21394e-06	69310.2	0.447266	9.08939e-07	146383	4124.66
4742	35	41	24	1.37	1.68	6.2	19	87	0.1	loam	0.32	23	2.8896	1.32241	6.30957e-07	0.13259	0.000298876	0.3426	0.765062	1.01229	-6.63882	-9.20069	1575.67	5.94924e-09	1.19611e-07	1.26329e-06	2.49851e-08	2.25157e-07	6.37431e-07	7.21394e-06	69310.2	0.447266	9.08939e-07	146383	4124.66
4744	35	41	24	1.37	1.68	6.2	19	87	0.1	loam	0.32	23	2.8896	1.32241	6.30957e-07	0.13259	0.000298876	0.3426	0.765062	1.01229	-6.63882	-9.20069	1575.67	5.94924e-09	1.19611e-07	1.26329e-06	2.49851e-08	2.25157e-07	6.37431e-07	7.21394e-06	69310.2	0.447266	9.08939e-07	146383	4124.66
4745	35	41	24	1.37	1.68	6.2	19	87	0.1	loam	0.32	23	2.8896	1.32241	6.30957e-07	0.13259	0.000298876	0.3426	0.765062	1.01229	-6.63882	-9.20069	1575.67	5.94924e-09	1.19611e-07	1.26329e-06	2.49851e-08	2.25157e-07	6.37431e-07	7.21394e-06	69310.2	0.447266	9.08939e-07	146383	4124.66
4746	35	41	24	1.37	1.68	6.2	19	87	0.1	loam	0.32	23	2.8896	1.32241	6.30957e-07	0.13259	0.000298876	0.3426	0.765062	1.01229	-6.63882	-9.20069	1575.67	5.94924e-09	1.19611e-07	1.26329e-06	2.49851e-08	2.25157e-07	6.37431e-07	7.21394e-06	69310.2	0.447266	9.08939e-07	146383	4124.66
4747	35	41	24	1.37	1.68	6.2	19	87	0.1	loam	0.32	23	2.8896	1.32241	6.30957e-07	0.13259	0.000298876	0.3426	0.765062	1.01229	-6.63882	-9.20069	1575.67	5.94924e-09	1.19611e-07	1.26329e-06	2.49851e-08	2.25157e-07	6.37431e-07	7.21394e-06	69310.2	0.447266	9.08939e-07	146383	4124.66
4748	73	18	9	1.59	1.4	7.5	12	75	0.1	sandy loam	0.2	13	2.408	1.04361	3.16228e-08	0.11474	6.78084e-11	0.356698	0.772814	0.797865	-6.96556	-10.6039	1889.82	2.24315e-09	1.17917e-07	1.26258e-06	1.70616e-08	2.1492e-08	6.18918e-07	2.31786e-06	215716	0.482972	3.16921e-08	171455	566.116
4752	73	18	9	1.59	1.4	7.5	12	75	0.1	sandy loam	0.2	13	2.408	1.04361	3.16228e-08	0.11474	6.78084e-11	0.356698	0.772814	0.797865	-6.96556	-10.6039	1889.82	2.24315e-09	1.17917e-07	1.26258e-06	1.70616e-08	2.1492e-08	6.18918e-07	2.31786e-06	215716	0.482972	3.16921e-08	171455	566.116
4753	73	18	9	1.59	1.4	7.5	12	75	0.1	sandy loam	0.2	13	2.408	1.04361	3.16228e-08	0.11474	6.78084e-11	0.356698	0.772814	0.797865	-6.96556	-10.6039	1889.82	2.24315e-09	1.17917e-07	1.26258e-06	1.70616e-08	2.1492e-08	6.18918e-07	2.31786e-06	215716	0.482972	3.16921e-08	171455	566.116
4754	73	18	9	1.59	1.4	7.5	12	75	0.1	sandy loam	0.2	13	2.408	1.04361	3.16228e-08	0.11474	6.78084e-11	0.356698	0.772814	0.797865	-6.96556	-10.6039	1889.82	2.24315e-09	1.17917e-07	1.26258e-06	1.70616e-08	2.1492e-08	6.18918e-07	2.31786e-06	215716	0.482972	3.16921e-08	171455	566.116
4755	73	18	9	1.59	1.4	7.5	12	75	0.1	sandy loam	0.2	13	2.408	1.04361	3.16228e-08	0.11474	6.78084e-11	0.356698	0.772814	0.797865	-6.96556	-10.6039	1889.82	2.24315e-09	1.17917e-07	1.26258e-06	1.70616e-08	2.1492e-08	6.18918e-07	2.31786e-06	215716	0.482972	3.16921e-08	171455	566.116
4756	73	18	9	1.59	1.4	7.5	12	75	0.1	sandy loam	0.2	13	2.408	1.04361	3.16228e-08	0.11474	6.78084e-11	0.356698	0.772814	0.797865	-6.96556	-10.6039	1889.82	2.24315e-09	1.17917e-07	1.26258e-06	1.70616e-08	2.1492e-08	6.18918e-07	2.31786e-06	215716	0.482972	3.16921e-08	171455	566.116
4764	12	35	53	1.21	2.22	4.8	24	55	0.1	clay (light)	0.2	24	3.8184	1.64877	1.58489e-05	0.12132	0.000648524	0.351138	0.769785	0.977535	-6.43575	-7.93657	1030.07	1.00052e-07	1.62624e-07	1.28122e-06	2.26173e-07	5.39649e-06	9.12086e-07	1.93306e-05	25865.8	0.395662	1.28004e-05	99858.9	13081.6
4847	37	44	19	1.41	0.82	6	14	83	0.1	loam	0.32	23	1.4104	1.12902	1e-06	0.10948	0.000576143	0.361492	0.775398	1.02248	-6.69827	-8.71521	1806.82	8.23128e-09	1.20654e-07	1.26372e-06	2.9864e-08	3.50564e-07	6.51347e-07	8.04521e-06	62148.8	0.457879	2.63835e-06	164946	12383.9
4848	56	22	22	1.42	1.11	6.4	22	87	0.1	sandy clay loam	0.16	13	1.9092	1.15702	3.98107e-07	0.21091	0.000472223	0.305523	0.743466	0.729168	-6.88896	-9.46983	1584.22	4.50937e-09	1.18953e-07	1.26301e-06	2.19067e-08	1.4603e-07	6.38052e-07	3.51258e-06	142346	0.412311	4.52813e-07	147082	3908.83
4849	37	44	19	1.41	0.82	6	14	83	0.1	loam	0.32	23	1.4104	1.12902	1e-06	0.10948	0.000576143	0.361492	0.775398	1.02248	-6.69827	-8.71521	1806.82	8.23128e-09	1.20654e-07	1.26372e-06	2.9864e-08	3.50564e-07	6.51347e-07	8.04521e-06	62148.8	0.457879	2.63835e-06	164946	12383.9
4850	56	22	22	1.42	1.11	6.4	22	87	0.1	sandy clay loam	0.16	13	1.9092	1.15702	3.98107e-07	0.21091	0.000472223	0.305523	0.743466	0.729168	-6.88896	-9.46983	1584.22	4.50937e-09	1.18953e-07	1.26301e-06	2.19067e-08	1.4603e-07	6.38052e-07	3.51258e-06	142346	0.412311	4.52813e-07	147082	3908.83
4851	37	44	19	1.41	0.82	6	14	83	0.1	loam	0.32	23	1.4104	1.12902	1e-06	0.10948	0.000576143	0.361492	0.775398	1.02248	-6.69827	-8.71521	1806.82	8.23128e-09	1.20654e-07	1.26372e-06	2.9864e-08	3.50564e-07	6.51347e-07	8.04521e-06	62148.8	0.457879	2.63835e-06	164946	12383.9
4852	37	44	19	1.41	0.82	6	14	83	0.1	loam	0.32	23	1.4104	1.12902	1e-06	0.10948	0.000576143	0.361492	0.775398	1.02248	-6.69827	-8.71521	1806.82	8.23128e-09	1.20654e-07	1.26372e-06	2.9864e-08	3.50564e-07	6.51347e-07	8.04521e-06	62148.8	0.457879	2.63835e-06	164946	12383.9
4853	37	44	19	1.41	0.82	6	14	83	0.1	loam	0.32	23	1.4104	1.12902	1e-06	0.10948	0.000576143	0.361492	0.775398	1.02248	-6.69827	-8.71521	1806.82	8.23128e-09	1.20654e-07	1.26372e-06	2.9864e-08	3.50564e-07	6.51347e-07	8.04521e-06	62148.8	0.457879	2.63835e-06	164946	12383.9
4855	37	44	19	1.41	0.82	6	14	83	0.1	loam	0.32	23	1.4104	1.12902	1e-06	0.10948	0.000576143	0.361492	0.775398	1.02248	-6.69827	-8.71521	1806.82	8.23128e-09	1.20654e-07	1.26372e-06	2.9864e-08	3.50564e-07	6.51347e-07	8.04521e-06	62148.8	0.457879	2.63835e-06	164946	12383.9
4856	56	22	22	1.42	1.11	6.4	22	87	0.1	sandy clay loam	0.16	13	1.9092	1.15702	3.98107e-07	0.21091	0.000472223	0.305523	0.743466	0.729168	-6.88896	-9.46983	1584.22	4.50937e-09	1.18953e-07	1.26301e-06	2.19067e-08	1.4603e-07	6.38052e-07	3.51258e-06	142346	0.412311	4.52813e-07	147082	3908.83
4858	37	44	19	1.41	0.82	6	14	83	0.1	loam	0.32	23	1.4104	1.12902	1e-06	0.10948	0.000576143	0.361492	0.775398	1.02248	-6.69827	-8.71521	1806.82	8.23128e-09	1.20654e-07	1.26372e-06	2.9864e-08	3.50564e-07	6.51347e-07	8.04521e-06	62148.8	0.457879	2.63835e-06	164946	12383.9
4860	56	22	22	1.42	1.11	6.4	22	87	0.1	sandy clay loam	0.16	13	1.9092	1.15702	3.98107e-07	0.21091	0.000472223	0.305523	0.743466	0.729168	-6.88896	-9.46983	1584.22	4.50937e-09	1.18953e-07	1.26301e-06	2.19067e-08	1.4603e-07	6.38052e-07	3.51258e-06	142346	0.412311	4.52813e-07	147082	3908.83
4862	56	22	22	1.42	1.11	6.4	22	87	0.1	sandy clay loam	0.16	13	1.9092	1.15702	3.98107e-07	0.21091	0.000472223	0.305523	0.743466	0.729168	-6.88896	-9.46983	1584.22	4.50937e-09	1.18953e-07	1.26301e-06	2.19067e-08	1.4603e-07	6.38052e-07	3.51258e-06	142346	0.412311	4.52813e-07	147082	3908.83
4863	37	44	19	1.41	0.82	6	14	83	0.1	loam	0.32	23	1.4104	1.12902	1e-06	0.10948	0.000576143	0.361492	0.775398	1.02248	-6.69827	-8.71521	1806.82	8.23128e-09	1.20654e-07	1.26372e-06	2.9864e-08	3.50564e-07	6.51347e-07	8.04521e-06	62148.8	0.457879	2.63835e-06	164946	12383.9
4864	37	44	19	1.41	0.82	6	14	83	0.1	loam	0.32	23	1.4104	1.12902	1e-06	0.10948	0.000576143	0.361492	0.775398	1.02248	-6.69827	-8.71521	1806.82	8.23128e-09	1.20654e-07	1.26372e-06	2.9864e-08	3.50564e-07	6.51347e-07	8.04521e-06	62148.8	0.457879	2.63835e-06	164946	12383.9
4865	37	44	19	1.41	0.82	6	14	83	0.1	loam	0.32	23	1.4104	1.12902	1e-06	0.10948	0.000576143	0.361492	0.775398	1.02248	-6.69827	-8.71521	1806.82	8.23128e-09	1.20654e-07	1.26372e-06	2.9864e-08	3.50564e-07	6.51347e-07	8.04521e-06	62148.8	0.457879	2.63835e-06	164946	12383.9
4868	37	44	19	1.41	0.82	6	14	83	0.1	loam	0.32	23	1.4104	1.12902	1e-06	0.10948	0.000576143	0.361492	0.775398	1.02248	-6.69827	-8.71521	1806.82	8.23128e-09	1.20654e-07	1.26372e-06	2.9864e-08	3.50564e-07	6.51347e-07	8.04521e-06	62148.8	0.457879	2.63835e-06	164946	12383.9
4869	37	44	19	1.41	0.82	6	14	83	0.1	loam	0.32	23	1.4104	1.12902	1e-06	0.10948	0.000576143	0.361492	0.775398	1.02248	-6.69827	-8.71521	1806.82	8.23128e-09	1.20654e-07	1.26372e-06	2.9864e-08	3.50564e-07	6.51347e-07	8.04521e-06	62148.8	0.457879	2.63835e-06	164946	12383.9
4870	56	22	22	1.42	1.11	6.4	22	87	0.1	sandy clay loam	0.16	13	1.9092	1.15702	3.98107e-07	0.21091	0.000472223	0.305523	0.743466	0.729168	-6.88896	-9.46983	1584.22	4.50937e-09	1.18953e-07	1.26301e-06	2.19067e-08	1.4603e-07	6.38052e-07	3.51258e-06	142346	0.412311	4.52813e-07	147082	3908.83
4871	47	29	24	1.39	0.86	6.4	12	89	0.1	loam	0.32	23	1.4792	1.07612	3.98107e-07	0.08436	0.000181828	0.389831	0.790167	1.0056	-6.75598	-9.14729	2063.58	4.50937e-09	1.18953e-07	1.26301e-06	2.19067e-08	1.4603e-07	6.30213e-07	5.49451e-06	90999.9	0.44043	1.0288e-06	184825	7621
4872	47	29	24	1.39	0.86	6.4	12	89	0.1	loam	0.32	23	1.4792	1.07612	3.98107e-07	0.08436	0.000181828	0.389831	0.790167	1.0056	-6.75598	-9.14729	2063.58	4.50937e-09	1.18953e-07	1.26301e-06	2.19067e-08	1.4603e-07	6.30213e-07	5.49451e-06	90999.9	0.44043	1.0288e-06	184825	7621
4873	47	29	24	1.39	0.86	6.4	12	89	0.1	loam	0.32	23	1.4792	1.07612	3.98107e-07	0.08436	0.000181828	0.389831	0.790167	1.0056	-6.75598	-9.14729	2063.58	4.50937e-09	1.18953e-07	1.26301e-06	2.19067e-08	1.4603e-07	6.30213e-07	5.49451e-06	90999.9	0.44043	1.0288e-06	184825	7621
4874	47	29	24	1.39	0.86	6.4	12	89	0.1	loam	0.32	23	1.4792	1.07612	3.98107e-07	0.08436	0.000181828	0.389831	0.790167	1.0056	-6.75598	-9.14729	2063.58	4.50937e-09	1.18953e-07	1.26301e-06	2.19067e-08	1.4603e-07	6.30213e-07	5.49451e-06	90999.9	0.44043	1.0288e-06	184825	7621
4875	47	29	24	1.39	0.86	6.4	12	89	0.1	loam	0.32	23	1.4792	1.07612	3.98107e-07	0.08436	0.000181828	0.389831	0.790167	1.0056	-6.75598	-9.14729	2063.58	4.50937e-09	1.18953e-07	1.26301e-06	2.19067e-08	1.4603e-07	6.30213e-07	5.49451e-06	90999.9	0.44043	1.0288e-06	184825	7621
4876	47	29	24	1.39	0.86	6.4	12	89	0.1	loam	0.32	23	1.4792	1.07612	3.98107e-07	0.08436	0.000181828	0.389831	0.790167	1.0056	-6.75598	-9.14729	2063.58	4.50937e-09	1.18953e-07	1.26301e-06	2.19067e-08	1.4603e-07	6.30213e-07	5.49451e-06	90999.9	0.44043	1.0288e-06	184825	7621
4877	26	27	47	1.25	1.22	6.3	18	77	0.1	clay (light)	0.2	24	2.0984	1.20398	5.01187e-07	0.11486	0.000189376	0.356593	0.772757	0.980478	-6.71257	-9.20279	1948.47	5.14678e-09	1.19244e-07	1.26313e-06	2.32695e-08	1.81058e-07	6.32214e-07	4.02187e-06	124320	0.398352	6.66708e-07	176006	5811.3
4878	47	29	24	1.39	0.86	6.4	12	89	0.1	loam	0.32	23	1.4792	1.07612	3.98107e-07	0.08436	0.000181828	0.389831	0.790167	1.0056	-6.75598	-9.14729	2063.58	4.50937e-09	1.18953e-07	1.26301e-06	2.19067e-08	1.4603e-07	6.30213e-07	5.49451e-06	90999.9	0.44043	1.0288e-06	184825	7621
4879	47	29	24	1.39	0.86	6.4	12	89	0.1	loam	0.32	23	1.4792	1.07612	3.98107e-07	0.08436	0.000181828	0.389831	0.790167	1.0056	-6.75598	-9.14729	2063.58	4.50937e-09	1.18953e-07	1.26301e-06	2.19067e-08	1.4603e-07	6.30213e-07	5.49451e-06	90999.9	0.44043	1.0288e-06	184825	7621
4880	47	29	24	1.39	0.86	6.4	12	89	0.1	loam	0.32	23	1.4792	1.07612	3.98107e-07	0.08436	0.000181828	0.389831	0.790167	1.0056	-6.75598	-9.14729	2063.58	4.50937e-09	1.18953e-07	1.26301e-06	2.19067e-08	1.4603e-07	6.30213e-07	5.49451e-06	90999.9	0.44043	1.0288e-06	184825	7621
4881	47	29	24	1.39	0.86	6.4	12	89	0.1	loam	0.32	23	1.4792	1.07612	3.98107e-07	0.08436	0.000181828	0.389831	0.790167	1.0056	-6.75598	-9.14729	2063.58	4.50937e-09	1.18953e-07	1.26301e-06	2.19067e-08	1.4603e-07	6.30213e-07	5.49451e-06	90999.9	0.44043	1.0288e-06	184825	7621
4882	47	29	24	1.39	0.86	6.4	12	89	0.1	loam	0.32	23	1.4792	1.07612	3.98107e-07	0.08436	0.000181828	0.389831	0.790167	1.0056	-6.75598	-9.14729	2063.58	4.50937e-09	1.18953e-07	1.26301e-06	2.19067e-08	1.4603e-07	6.30213e-07	5.49451e-06	90999.9	0.44043	1.0288e-06	184825	7621
4884	47	29	24	1.39	0.86	6.4	12	89	0.1	loam	0.32	23	1.4792	1.07612	3.98107e-07	0.08436	0.000181828	0.389831	0.790167	1.0056	-6.75598	-9.14729	2063.58	4.50937e-09	1.18953e-07	1.26301e-06	2.19067e-08	1.4603e-07	6.30213e-07	5.49451e-06	90999.9	0.44043	1.0288e-06	184825	7621
4885	47	29	24	1.39	0.86	6.4	12	89	0.1	loam	0.32	23	1.4792	1.07612	3.98107e-07	0.08436	0.000181828	0.389831	0.790167	1.0056	-6.75598	-9.14729	2063.58	4.50937e-09	1.18953e-07	1.26301e-06	2.19067e-08	1.4603e-07	6.30213e-07	5.49451e-06	90999.9	0.44043	1.0288e-06	72203.6	2977.22
4886	26	27	47	1.25	1.22	6.3	18	77	0.1	clay (light)	0.2	24	2.0984	1.20398	5.01187e-07	0.11486	0.000189376	0.356593	0.772757	0.980478	-6.71257	-9.20279	1948.47	5.14678e-09	1.19244e-07	1.26313e-06	2.32695e-08	1.81058e-07	6.32214e-07	4.02187e-06	124320	0.398352	6.66708e-07	176006	5811.3
4888	42	36	22	1.4	0.94	6.1	14	89	0.1	loam	0.32	23	1.6168	1.15532	7.94328e-07	0.10864	0.00048526	0.362288	0.775825	1.01296	-6.69982	-8.87571	1813.26	6.95947e-09	1.20073e-07	1.26348e-06	2.71449e-08	2.80673e-07	6.45309e-07	7.38569e-06	67698.5	0.447948	1.87691e-06	165454	9417.29
4889	42	36	22	1.4	0.94	6.1	14	89	0.1	loam	0.32	23	1.6168	1.15532	7.94328e-07	0.10864	0.00048526	0.362288	0.775825	1.01296	-6.69982	-8.87571	1813.26	6.95947e-09	1.20073e-07	1.26348e-06	2.71449e-08	2.80673e-07	6.45309e-07	7.38569e-06	67698.5	0.447948	1.87691e-06	165454	9417.29
4890	80	10	10	1.59	0.6	6.2	6	83	0.1	sandy loam	0.2	13	1.032	0.995986	6.30957e-07	0.02889	6.45133e-05	0.525075	0.851247	0.781577	-6.90993	-8.9896	1662.57	5.94924e-09	1.19611e-07	1.26329e-06	2.49851e-08	2.25157e-07	6.31105e-07	2.93695e-06	170244	0.465194	1.35377e-06	153439	16450.8
4893	47	32	21	1.41	0.82	6.2	11	88	0.1	loam	0.32	23	1.4104	1.09502	6.30957e-07	0.07371	0.000260118	0.405498	0.797989	1.01505	-6.72959	-8.92123	1941.93	5.94924e-09	1.19611e-07	1.26329e-06	2.49851e-08	2.25157e-07	6.36385e-07	6.0933e-06	82057.3	0.450109	1.67011e-06	175501	10825.8
4894	47	32	21	1.41	0.82	6.2	11	88	0.1	loam	0.32	23	1.4104	1.09502	6.30957e-07	0.07371	0.000260118	0.405498	0.797989	1.01505	-6.72959	-8.92123	1941.93	5.94924e-09	1.19611e-07	1.26329e-06	2.49851e-08	2.25157e-07	6.36385e-07	6.0933e-06	82057.3	0.450109	1.67011e-06	175501	10825.8
4896	47	32	21	1.41	0.82	6.2	11	88	0.1	loam	0.32	23	1.4104	1.09502	6.30957e-07	0.07371	0.000260118	0.405498	0.797989	1.01505	-6.72959	-8.92123	1941.93	5.94924e-09	1.19611e-07	1.26329e-06	2.49851e-08	2.25157e-07	6.36385e-07	6.0933e-06	82057.3	0.450109	1.67011e-06	175501	10825.8
4897	81	9	10	1.59	0.57	6.2	5	89	0.1	loamy sand	0.17	13	0.9804	0.979724	6.30957e-07	0.02018	2.74129e-05	0.572341	0.869789	0.781065	-6.91684	-8.97019	1689.27	5.94924e-09	1.19611e-07	1.26329e-06	2.49851e-08	2.25157e-07	6.30103e-07	2.28964e-06	218375	0.464645	1.20472e-06	155587	19018.9
4898	47	32	21	1.41	0.82	6.2	11	88	0.1	loam	0.32	23	1.4104	1.09502	6.30957e-07	0.07371	0.000260118	0.405498	0.797989	1.01505	-6.72959	-8.92123	1941.93	5.94924e-09	1.19611e-07	1.26329e-06	2.49851e-08	2.25157e-07	6.36385e-07	6.0933e-06	82057.3	0.450109	1.67011e-06	175501	10825.8
4899	30	24	46	1.26	1.39	6.3	22	83	0.1	clay (light)	0.2	24	2.3908	1.24534	5.01187e-07	0.1605	0.000389607	0.325699	0.755447	0.983378	-6.69402	-9.25087	1867	5.14678e-09	1.19244e-07	1.26313e-06	2.32695e-08	1.81058e-07	6.37618e-07	4.40961e-06	113389	0.401021	5.88167e-07	169673	4537.87
4900	47	32	21	1.41	0.82	6.2	11	88	0.1	loam	0.32	23	1.4104	1.09502	6.30957e-07	0.07371	0.000260118	0.405498	0.797989	1.01505	-6.72959	-8.92123	1941.93	5.94924e-09	1.19611e-07	1.26329e-06	2.49851e-08	2.25157e-07	6.36385e-07	6.0933e-06	82057.3	0.450109	1.67011e-06	175501	10825.8
4901	47	32	21	1.41	0.82	6.2	11	88	0.1	loam	0.32	23	1.4104	1.09502	6.30957e-07	0.07371	0.000260118	0.405498	0.797989	1.01505	-6.72959	-8.92123	1941.93	5.94924e-09	1.19611e-07	1.26329e-06	2.49851e-08	2.25157e-07	6.36385e-07	6.0933e-06	82057.3	0.450109	1.67011e-06	175501	10825.8
4902	47	32	21	1.41	0.82	6.2	11	88	0.1	loam	0.32	23	1.4104	1.09502	6.30957e-07	0.07371	0.000260118	0.405498	0.797989	1.01505	-6.72959	-8.92123	1941.93	5.94924e-09	1.19611e-07	1.26329e-06	2.49851e-08	2.25157e-07	6.36385e-07	6.0933e-06	82057.3	0.450109	1.67011e-06	175501	10825.8
4903	47	32	21	1.41	0.82	6.2	11	88	0.1	loam	0.32	23	1.4104	1.09502	6.30957e-07	0.07371	0.000260118	0.405498	0.797989	1.01505	-6.72959	-8.92123	1941.93	5.94924e-09	1.19611e-07	1.26329e-06	2.49851e-08	2.25157e-07	6.36385e-07	6.0933e-06	82057.3	0.450109	1.67011e-06	175501	10825.8
4904	47	32	21	1.41	0.82	6.2	11	88	0.1	loam	0.32	23	1.4104	1.09502	6.30957e-07	0.07371	0.000260118	0.405498	0.797989	1.01505	-6.72959	-8.92123	1941.93	5.94924e-09	1.19611e-07	1.26329e-06	2.49851e-08	2.25157e-07	6.36385e-07	6.0933e-06	82057.3	0.450109	1.67011e-06	175501	10825.8
4905	47	32	21	1.41	0.82	6.2	11	88	0.1	loam	0.32	23	1.4104	1.09502	6.30957e-07	0.07371	0.000260118	0.405498	0.797989	1.01505	-6.72959	-8.92123	1941.93	5.94924e-09	1.19611e-07	1.26329e-06	2.49851e-08	2.25157e-07	6.36385e-07	6.0933e-06	82057.3	0.450109	1.67011e-06	175501	10825.8
4906	47	32	21	1.41	0.82	6.2	11	88	0.1	loam	0.32	23	1.4104	1.09502	6.30957e-07	0.07371	0.000260118	0.405498	0.797989	1.01505	-6.72959	-8.92123	1941.93	5.94924e-09	1.19611e-07	1.26329e-06	2.49851e-08	2.25157e-07	6.36385e-07	6.0933e-06	82057.3	0.450109	1.67011e-06	175501	10825.8
4908	47	32	21	1.41	0.82	6.2	11	88	0.1	loam	0.32	23	1.4104	1.09502	6.30957e-07	0.07371	0.000260118	0.405498	0.797989	1.01505	-6.72959	-8.92123	1941.93	5.94924e-09	1.19611e-07	1.26329e-06	2.49851e-08	2.25157e-07	6.36385e-07	6.0933e-06	82057.3	0.450109	1.67011e-06	175501	10825.8
4909	47	32	21	1.41	0.82	6.2	11	88	0.1	loam	0.32	23	1.4104	1.09502	6.30957e-07	0.07371	0.000260118	0.405498	0.797989	1.01505	-6.72959	-8.92123	1941.93	5.94924e-09	1.19611e-07	1.26329e-06	2.49851e-08	2.25157e-07	6.36385e-07	6.0933e-06	82057.3	0.450109	1.67011e-06	175501	10825.8
4910	47	32	21	1.41	0.82	6.2	11	88	0.1	loam	0.32	23	1.4104	1.09502	6.30957e-07	0.07371	0.000260118	0.405498	0.797989	1.01505	-6.72959	-8.92123	1941.93	5.94924e-09	1.19611e-07	1.26329e-06	2.49851e-08	2.25157e-07	6.36385e-07	6.0933e-06	82057.3	0.450109	1.67011e-06	175501	10825.8
4911	47	32	21	1.41	0.82	6.2	11	88	0.1	loam	0.32	23	1.4104	1.09502	6.30957e-07	0.07371	0.000260118	0.405498	0.797989	1.01505	-6.72959	-8.92123	1941.93	5.94924e-09	1.19611e-07	1.26329e-06	2.49851e-08	2.25157e-07	6.36385e-07	6.0933e-06	82057.3	0.450109	1.67011e-06	175501	10825.8
4915	47	32	21	1.41	0.82	6.2	11	88	0.1	loam	0.32	23	1.4104	1.09502	6.30957e-07	0.07371	0.000260118	0.405498	0.797989	1.01505	-6.72959	-8.92123	1941.93	5.94924e-09	1.19611e-07	1.26329e-06	2.49851e-08	2.25157e-07	6.36385e-07	6.0933e-06	82057.3	0.450109	1.67011e-06	175501	10825.8
4916	47	32	21	1.41	0.82	6.2	11	88	0.1	loam	0.32	23	1.4104	1.09502	6.30957e-07	0.07371	0.000260118	0.405498	0.797989	1.01505	-6.72959	-8.92123	1941.93	5.94924e-09	1.19611e-07	1.26329e-06	2.49851e-08	2.25157e-07	6.36385e-07	6.0933e-06	82057.3	0.450109	1.67011e-06	175501	10825.8
4917	47	32	21	1.41	0.82	6.2	11	88	0.1	loam	0.32	23	1.4104	1.09502	6.30957e-07	0.07371	0.000260118	0.405498	0.797989	1.01505	-6.72959	-8.92123	1941.93	5.94924e-09	1.19611e-07	1.26329e-06	2.49851e-08	2.25157e-07	6.36385e-07	6.0933e-06	82057.3	0.450109	1.67011e-06	175501	10825.8
4926	26	35	39	1.28	35.27	5	80	64	0.1	clay (light)	0.2	16	60.6644	2.49154	1e-05	0.49584	2.98023e-13	0.287349	0.732154	0.825082	-6.19773	-9.329	396.97	6.38843e-08	1.46092e-07	1.27433e-06	1.48848e-07	3.40893e-06	7.92647e-07	1.81551e-05	27540.5	0.417793	6.96354e-07	40536.3	324.793
4927	26	35	39	1.28	35.27	5	80	64	0.1	clay (light)	0.2	16	60.6644	2.49154	1e-05	0.49584	2.98023e-13	0.287349	0.732154	0.825082	-6.19773	-9.329	396.97	6.38843e-08	1.46092e-07	1.27433e-06	1.48848e-07	3.40893e-06	7.92647e-07	1.81551e-05	27540.5	0.417793	6.96354e-07	40536.3	324.793
4928	26	33	41	1.27	30.73	4.4	77	58	0.1	clay (light)	0.2	16	52.8556	2.54986	3.98107e-05	0.43119	2.13795e-11	0.283892	0.729942	0.819991	-6.13796	-8.67986	345.929	2.48224e-07	2.30352e-07	1.30945e-06	5.42959e-07	1.35391e-05	1.31219e-06	4.24045e-05	11791.2	0.412925	3.16566e-06	35478.1	546.832
4929	26	33	41	1.27	30.73	4.4	77	58	0.1	clay (light)	0.2	16	52.8556	2.54986	3.98107e-05	0.43119	2.13795e-11	0.283892	0.729942	0.819991	-6.13796	-8.67986	345.929	2.48224e-07	2.30352e-07	1.30945e-06	5.42959e-07	1.35391e-05	1.31219e-06	4.24045e-05	11791.2	0.412925	3.16566e-06	35478.1	546.832
4930	26	33	41	1.27	30.73	4.4	77	58	0.1	clay (light)	0.2	16	52.8556	2.54986	3.98107e-05	0.43119	2.13795e-11	0.283892	0.729942	0.819991	-6.13796	-8.67986	345.929	2.48224e-07	2.30352e-07	1.30945e-06	5.42959e-07	1.35391e-05	1.31219e-06	4.24045e-05	11791.2	0.412925	3.16566e-06	35478.1	546.832
4931	26	33	41	1.27	30.73	4.4	77	58	0.1	clay (light)	0.2	16	52.8556	2.54986	3.98107e-05	0.43119	2.13795e-11	0.283892	0.729942	0.819991	-6.13796	-8.67986	345.929	2.48224e-07	2.30352e-07	1.30945e-06	5.42959e-07	1.35391e-05	1.31219e-06	4.24045e-05	11791.2	0.412925	3.16566e-06	35478.1	546.832
4932	26	33	41	1.27	30.73	4.4	77	58	0.1	clay (light)	0.2	16	52.8556	2.54986	3.98107e-05	0.43119	2.13795e-11	0.283892	0.729942	0.819991	-6.13796	-8.67986	345.929	2.48224e-07	2.30352e-07	1.30945e-06	5.42959e-07	1.35391e-05	1.31219e-06	4.24045e-05	11791.2	0.412925	3.16566e-06	35478.1	546.832
4933	26	33	41	1.27	30.73	4.4	77	58	0.1	clay (light)	0.2	16	52.8556	2.54986	3.98107e-05	0.43119	2.13795e-11	0.283892	0.729942	0.819991	-6.13796	-8.67986	345.929	2.48224e-07	2.30352e-07	1.30945e-06	5.42959e-07	1.35391e-05	1.31219e-06	4.24045e-05	11791.2	0.412925	3.16566e-06	35478.1	546.832
4934	25	35	40	1.27	38.37	5.9	88	100	0.1	clay (light)	0.2	16	65.9964	2.36525	1.25893e-06	0.63303	2.97887e-15	0.303026	0.741942	0.824043	-6.30836	-10.2624	512.148	9.83242e-09	1.21386e-07	1.26403e-06	3.32872e-08	4.38553e-07	6.40308e-07	6.51905e-06	76698.3	0.416795	8.2011e-08	51792.8	135.784
4935	18	61	21	1.36	35.27	5	80	64	0.1	silt loam	0.35	16	60.6644	2.49154	1e-05	0.49997	2.87828e-13	0.287665	0.732355	0.871054	-6.17014	-9.29176	372.541	6.38843e-08	1.46092e-07	1.27433e-06	1.48848e-07	3.40893e-06	7.92647e-07	3.17365e-05	15754.7	0.464445	1.1241e-06	38120.8	313.553
4936	18	61	21	1.36	35.27	5	80	64	0.1	silt loam	0.35	16	60.6644	2.49154	1e-05	0.49997	2.87828e-13	0.287665	0.732355	0.871054	-6.17014	-9.29176	372.541	6.38843e-08	1.46092e-07	1.27433e-06	1.48848e-07	3.40893e-06	7.92647e-07	3.17365e-05	15754.7	0.464445	1.1241e-06	38120.8	313.553
4937	86	10	4	1.73	1.62	4.5	5	18	0.1	loamy sand	0.17	13	2.7864	1.59988	3.16228e-05	0.00294861	1.46822e-08	0.787645	0.942069	0.859546	-6.50685	-7.61036	657.21	1.97593e-07	2.07209e-07	1.2998e-06	4.34711e-07	1.07567e-05	1.16949e-06	1.11651e-05	44782.4	0.556677	2.11635e-05	65667.2	34645.5
4938	49	38	13	1.49	3.62	5	16	10	0.1	loam	0.32	23	6.2264	1.76979	1e-05	0.0695	1.63563e-09	0.412506	0.801415	1.06549	-6.34682	-8.25432	804.386	6.38843e-08	1.46092e-07	1.27433e-06	1.48848e-07	3.40893e-06	7.92647e-07	2.02348e-05	24709.9	0.505552	6.53485e-06	79410.2	6482.6
4939	85	10	5	1.7	2.08	4.3	5	16	0.1	loamy sand	0.17	13	3.5776	1.71312	5.01187e-05	0.00212415	1.32459e-09	0.814844	0.950098	0.845471	-6.45623	-7.51837	584.901	3.11965e-07	2.59487e-07	1.3216e-06	6.79236e-07	1.7042e-05	1.49183e-06	1.46856e-05	34046.9	0.538925	2.74948e-05	58792.8	29660.6
4940	49	38	13	1.49	3.62	5	16	10	0.1	loam	0.32	23	6.2264	1.76979	1e-05	0.0695	1.63563e-09	0.412506	0.801415	1.06549	-6.34682	-8.25432	804.386	6.38843e-08	1.46092e-07	1.27433e-06	1.48848e-07	3.40893e-06	7.92647e-07	2.02348e-05	24709.9	0.505552	6.53485e-06	79410.2	6482.6
4941	49	38	13	1.49	3.62	5	16	10	0.1	loam	0.32	23	6.2264	1.76979	1e-05	0.0695	1.63563e-09	0.412506	0.801415	1.06549	-6.34682	-8.25432	804.386	6.38843e-08	1.46092e-07	1.27433e-06	1.48848e-07	3.40893e-06	7.92647e-07	2.02348e-05	24709.9	0.505552	6.53485e-06	79410.2	6482.6
4942	85	10	5	1.7	2.08	4.3	5	16	0.1	loamy sand	0.17	13	3.5776	1.71312	5.01187e-05	0.00212415	1.32459e-09	0.814844	0.950098	0.845471	-6.45623	-7.51837	584.901	3.11965e-07	2.59487e-07	1.3216e-06	6.79236e-07	1.7042e-05	1.49183e-06	1.46856e-05	34046.9	0.538925	2.74948e-05	58792.8	29660.6
4943	85	11	4	1.73	2.09	4.5	10	16	0.1	loamy sand	0.17	13	3.5948	1.68064	3.16228e-05	0.02844	3.44835e-06	0.527152	0.852087	0.862091	-6.4725	-7.70676	607.23	1.97593e-07	2.07209e-07	1.2998e-06	4.34711e-07	1.07567e-05	1.16958e-06	1.66826e-05	29971.4	0.559948	1.68516e-05	60924.3	17230.1
4944	85	11	4	1.73	2.09	4.5	10	16	0.1	loamy sand	0.17	13	3.5948	1.68064	3.16228e-05	0.02844	3.44835e-06	0.527152	0.852087	0.862091	-6.4725	-7.70676	607.23	1.97593e-07	2.07209e-07	1.2998e-06	4.34711e-07	1.07567e-05	1.16958e-06	1.66826e-05	29971.4	0.559948	1.68516e-05	60924.3	17230.1
4945	85	11	4	1.73	2.09	4.5	10	16	0.1	loamy sand	0.17	13	3.5948	1.68064	3.16228e-05	0.02844	3.44835e-06	0.527152	0.852087	0.862091	-6.4725	-7.70676	607.23	1.97593e-07	2.07209e-07	1.2998e-06	4.34711e-07	1.07567e-05	1.16958e-06	1.66826e-05	29971.4	0.559948	1.68516e-05	60924.3	17230.1
4946	85	11	4	1.73	2.09	4.5	10	16	0.1	loamy sand	0.17	13	3.5948	1.68064	3.16228e-05	0.02844	3.44835e-06	0.527152	0.852087	0.862091	-6.4725	-7.70676	607.23	1.97593e-07	2.07209e-07	1.2998e-06	4.34711e-07	1.07567e-05	1.16958e-06	1.66826e-05	29971.4	0.559948	1.68516e-05	60924.3	17230.1
4947	85	11	4	1.73	2.09	4.5	10	16	0.1	loamy sand	0.17	13	3.5948	1.68064	3.16228e-05	0.02844	3.44835e-06	0.527152	0.852087	0.862091	-6.4725	-7.70676	607.23	1.97593e-07	2.07209e-07	1.2998e-06	4.34711e-07	1.07567e-05	1.16958e-06	1.66826e-05	29971.4	0.559948	1.68516e-05	60924.3	17230.1
4948	85	11	4	1.73	2.09	4.5	10	16	0.1	loamy sand	0.17	13	3.5948	1.68064	3.16228e-05	0.02844	3.44835e-06	0.527152	0.852087	0.862091	-6.4725	-7.70676	607.23	1.97593e-07	2.07209e-07	1.2998e-06	4.34711e-07	1.07567e-05	1.16958e-06	1.66826e-05	29971.4	0.559948	1.68516e-05	60924.3	17230.1
4949	54	38	8	1.57	4.63	4.6	21	24	0.1	sandy loam	0.2	13	7.9636	1.91581	2.51189e-05	0.09679	1.88706e-06	0.374543	0.782304	0.81856	-6.40956	-8.14946	525.304	1.57375e-07	1.88826e-07	1.29214e-06	3.48727e-07	8.5466e-06	1.05619e-06	2.386e-05	20955.6	0.506543	8.71371e-06	53064.9	4908.25
4950	85	11	4	1.73	2.09	4.5	10	16	0.1	loamy sand	0.17	13	3.5948	1.68064	3.16228e-05	0.02844	3.44835e-06	0.527152	0.852087	0.862091	-6.4725	-7.70676	607.23	1.97593e-07	2.07209e-07	1.2998e-06	4.34711e-07	1.07567e-05	1.16958e-06	1.66826e-05	29971.4	0.559948	1.68516e-05	60924.3	17230.1
4951	85	11	4	1.73	2.09	4.5	10	16	0.1	loamy sand	0.17	13	3.5948	1.68064	3.16228e-05	0.02844	3.44835e-06	0.527152	0.852087	0.862091	-6.4725	-7.70676	607.23	1.97593e-07	2.07209e-07	1.2998e-06	4.34711e-07	1.07567e-05	1.16958e-06	1.66826e-05	29971.4	0.559948	1.68516e-05	60924.3	17230.1
4952	85	11	4	1.73	2.09	4.5	10	16	0.1	loamy sand	0.17	13	3.5948	1.68064	3.16228e-05	0.02844	3.44835e-06	0.527152	0.852087	0.862091	-6.4725	-7.70676	607.23	1.97593e-07	2.07209e-07	1.2998e-06	4.34711e-07	1.07567e-05	1.16958e-06	1.66826e-05	29971.4	0.559948	1.68516e-05	60924.3	17230.1
4953	54	38	8	1.57	4.63	4.6	21	24	0.1	sandy loam	0.2	13	7.9636	1.91581	2.51189e-05	0.09679	1.88706e-06	0.374543	0.782304	0.81856	-6.40956	-8.14946	525.304	1.57375e-07	1.88826e-07	1.29214e-06	3.48727e-07	8.5466e-06	1.05619e-06	2.386e-05	20955.6	0.506543	8.71371e-06	53064.9	4908.25
4954	85	11	4	1.73	2.09	4.5	10	16	0.1	loamy sand	0.17	13	3.5948	1.68064	3.16228e-05	0.02844	3.44835e-06	0.527152	0.852087	0.862091	-6.4725	-7.70676	607.23	1.97593e-07	2.07209e-07	1.2998e-06	4.34711e-07	1.07567e-05	1.16958e-06	1.66826e-05	29971.4	0.559948	1.68516e-05	60924.3	17230.1
4955	54	38	8	1.57	4.63	4.6	21	24	0.1	sandy loam	0.2	13	7.9636	1.91581	2.51189e-05	0.09679	1.88706e-06	0.374543	0.782304	0.81856	-6.40956	-8.14946	525.304	1.57375e-07	1.88826e-07	1.29214e-06	3.48727e-07	8.5466e-06	1.05619e-06	2.386e-05	20955.6	0.506543	8.71371e-06	53064.9	4908.25
4956	54	38	8	1.57	4.63	4.6	21	24	0.1	sandy loam	0.2	13	7.9636	1.91581	2.51189e-05	0.09679	1.88706e-06	0.374543	0.782304	0.81856	-6.40956	-8.14946	525.304	1.57375e-07	1.88826e-07	1.29214e-06	3.48727e-07	8.5466e-06	1.05619e-06	2.386e-05	20955.6	0.506543	8.71371e-06	53064.9	4908.25
4957	85	11	4	1.73	2.09	4.5	10	16	0.1	loamy sand	0.17	13	3.5948	1.68064	3.16228e-05	0.02844	3.44835e-06	0.527152	0.852087	0.862091	-6.4725	-7.70676	607.23	1.97593e-07	2.07209e-07	1.2998e-06	4.34711e-07	1.07567e-05	1.16958e-06	1.66826e-05	29971.4	0.559948	1.68516e-05	60924.3	17230.1
4958	85	11	4	1.73	2.09	4.5	10	16	0.1	loamy sand	0.17	13	3.5948	1.68064	3.16228e-05	0.02844	3.44835e-06	0.527152	0.852087	0.862091	-6.4725	-7.70676	607.23	1.97593e-07	2.07209e-07	1.2998e-06	4.34711e-07	1.07567e-05	1.16958e-06	1.66826e-05	29971.4	0.559948	1.68516e-05	60924.3	17230.1
4959	85	11	4	1.73	2.09	4.5	10	16	0.1	loamy sand	0.17	13	3.5948	1.68064	3.16228e-05	0.02844	3.44835e-06	0.527152	0.852087	0.862091	-6.4725	-7.70676	607.23	1.97593e-07	2.07209e-07	1.2998e-06	4.34711e-07	1.07567e-05	1.16958e-06	1.66826e-05	29971.4	0.559948	1.68516e-05	60924.3	17230.1
4960	85	11	4	1.73	2.09	4.5	10	16	0.1	loamy sand	0.17	13	3.5948	1.68064	3.16228e-05	0.02844	3.44835e-06	0.527152	0.852087	0.862091	-6.4725	-7.70676	607.23	1.97593e-07	2.07209e-07	1.2998e-06	4.34711e-07	1.07567e-05	1.16958e-06	1.66826e-05	29971.4	0.559948	1.68516e-05	60924.3	17230.1
4962	85	11	4	1.73	2.09	4.5	10	16	0.1	loamy sand	0.17	13	3.5948	1.68064	3.16228e-05	0.02844	3.44835e-06	0.527152	0.852087	0.862091	-6.4725	-7.70676	607.23	1.97593e-07	2.07209e-07	1.2998e-06	4.34711e-07	1.07567e-05	1.16958e-06	1.66826e-05	29971.4	0.559948	1.68516e-05	60924.3	17230.1
4963	54	38	8	1.57	4.63	4.6	21	24	0.1	sandy loam	0.2	13	7.9636	1.91581	2.51189e-05	0.09679	1.88706e-06	0.374543	0.782304	0.81856	-6.40956	-8.14946	525.304	1.57375e-07	1.88826e-07	1.29214e-06	3.48727e-07	8.5466e-06	1.05619e-06	2.386e-05	20955.6	0.506543	8.71371e-06	53064.9	4908.25
4964	54	38	8	1.57	4.63	4.6	21	24	0.1	sandy loam	0.2	13	7.9636	1.91581	2.51189e-05	0.09679	1.88706e-06	0.374543	0.782304	0.81856	-6.40956	-8.14946	525.304	1.57375e-07	1.88826e-07	1.29214e-06	3.48727e-07	8.5466e-06	1.05619e-06	2.386e-05	20955.6	0.506543	8.71371e-06	53064.9	4908.25
4965	54	38	8	1.57	4.63	4.6	21	24	0.1	sandy loam	0.2	13	7.9636	1.91581	2.51189e-05	0.09679	1.88706e-06	0.374543	0.782304	0.81856	-6.40956	-8.14946	525.304	1.57375e-07	1.88826e-07	1.29214e-06	3.48727e-07	8.5466e-06	1.05619e-06	2.386e-05	20955.6	0.506543	8.71371e-06	53064.9	4908.25
4966	54	38	8	1.57	4.63	4.6	21	24	0.1	sandy loam	0.2	13	7.9636	1.91581	2.51189e-05	0.09679	1.88706e-06	0.374543	0.782304	0.81856	-6.40956	-8.14946	525.304	1.57375e-07	1.88826e-07	1.29214e-06	3.48727e-07	8.5466e-06	1.05619e-06	2.386e-05	20955.6	0.506543	8.71371e-06	53064.9	4908.25
4967	54	38	8	1.57	4.63	4.6	21	24	0.1	sandy loam	0.2	13	7.9636	1.91581	2.51189e-05	0.09679	1.88706e-06	0.374543	0.782304	0.81856	-6.40956	-8.14946	525.304	1.57375e-07	1.88826e-07	1.29214e-06	3.48727e-07	8.5466e-06	1.05619e-06	2.386e-05	20955.6	0.506543	8.71371e-06	53064.9	4908.25
4968	54	38	8	1.57	4.63	4.6	21	24	0.1	sandy loam	0.2	13	7.9636	1.91581	2.51189e-05	0.09679	1.88706e-06	0.374543	0.782304	0.81856	-6.40956	-8.14946	525.304	1.57375e-07	1.88826e-07	1.29214e-06	3.48727e-07	8.5466e-06	1.05619e-06	2.386e-05	20955.6	0.506543	8.71371e-06	53064.9	4908.25
4969	54	38	8	1.57	4.63	4.6	21	24	0.1	sandy loam	0.2	13	7.9636	1.91581	2.51189e-05	0.09679	1.88706e-06	0.374543	0.782304	0.81856	-6.40956	-8.14946	525.304	1.57375e-07	1.88826e-07	1.29214e-06	3.48727e-07	8.5466e-06	1.05619e-06	2.386e-05	20955.6	0.506543	8.71371e-06	53064.9	4908.25
4970	85	11	4	1.73	2.09	4.5	10	16	0.1	loamy sand	0.17	13	3.5948	1.68064	3.16228e-05	0.02844	3.44835e-06	0.527152	0.852087	0.862091	-6.4725	-7.70676	607.23	1.97593e-07	2.07209e-07	1.2998e-06	4.34711e-07	1.07567e-05	1.16958e-06	1.66826e-05	29971.4	0.559948	1.68516e-05	60924.3	17230.1
4971	85	11	4	1.73	2.09	4.5	10	16	0.1	loamy sand	0.17	13	3.5948	1.68064	3.16228e-05	0.02844	3.44835e-06	0.527152	0.852087	0.862091	-6.4725	-7.70676	607.23	1.97593e-07	2.07209e-07	1.2998e-06	4.34711e-07	1.07567e-05	1.16958e-06	1.66826e-05	29971.4	0.559948	1.68516e-05	60924.3	17230.1
4972	85	11	4	1.73	2.09	4.5	10	16	0.1	loamy sand	0.17	13	3.5948	1.68064	3.16228e-05	0.02844	3.44835e-06	0.527152	0.852087	0.862091	-6.4725	-7.70676	607.23	1.97593e-07	2.07209e-07	1.2998e-06	4.34711e-07	1.07567e-05	1.16958e-06	1.66826e-05	29971.4	0.559948	1.68516e-05	60924.3	17230.1
4973	85	11	4	1.73	2.09	4.5	10	16	0.1	loamy sand	0.17	13	3.5948	1.68064	3.16228e-05	0.02844	3.44835e-06	0.527152	0.852087	0.862091	-6.4725	-7.70676	607.23	1.97593e-07	2.07209e-07	1.2998e-06	4.34711e-07	1.07567e-05	1.16958e-06	1.66826e-05	29971.4	0.559948	1.68516e-05	60924.3	17230.1
4974	85	11	4	1.73	2.09	4.5	10	16	0.1	loamy sand	0.17	13	3.5948	1.68064	3.16228e-05	0.02844	3.44835e-06	0.527152	0.852087	0.862091	-6.4725	-7.70676	607.23	1.97593e-07	2.07209e-07	1.2998e-06	4.34711e-07	1.07567e-05	1.16958e-06	1.66826e-05	29971.4	0.559948	1.68516e-05	60924.3	17230.1
4975	85	11	4	1.73	2.09	4.5	10	16	0.1	loamy sand	0.17	13	3.5948	1.68064	3.16228e-05	0.02844	3.44835e-06	0.527152	0.852087	0.862091	-6.4725	-7.70676	607.23	1.97593e-07	2.07209e-07	1.2998e-06	4.34711e-07	1.07567e-05	1.16958e-06	1.66826e-05	29971.4	0.559948	1.68516e-05	60924.3	17230.1
4976	85	11	4	1.73	2.09	4.5	10	16	0.1	loamy sand	0.17	13	3.5948	1.68064	3.16228e-05	0.02844	3.44835e-06	0.527152	0.852087	0.862091	-6.4725	-7.70676	607.23	1.97593e-07	2.07209e-07	1.2998e-06	4.34711e-07	1.07567e-05	1.16958e-06	1.66826e-05	29971.4	0.559948	1.68516e-05	60924.3	17230.1
4977	85	11	4	1.73	2.09	4.5	10	16	0.1	loamy sand	0.17	13	3.5948	1.68064	3.16228e-05	0.02844	3.44835e-06	0.527152	0.852087	0.862091	-6.4725	-7.70676	607.23	1.97593e-07	2.07209e-07	1.2998e-06	4.34711e-07	1.07567e-05	1.16958e-06	1.66826e-05	29971.4	0.559948	1.68516e-05	60924.3	17230.1
4978	85	11	4	1.73	2.09	4.5	10	16	0.1	loamy sand	0.17	13	3.5948	1.68064	3.16228e-05	0.02844	3.44835e-06	0.527152	0.852087	0.862091	-6.4725	-7.70676	607.23	1.97593e-07	2.07209e-07	1.2998e-06	4.34711e-07	1.07567e-05	1.16958e-06	1.66826e-05	29971.4	0.559948	1.68516e-05	60924.3	17230.1
4979	85	11	4	1.73	2.09	4.5	10	16	0.1	loamy sand	0.17	13	3.5948	1.68064	3.16228e-05	0.02844	3.44835e-06	0.527152	0.852087	0.862091	-6.4725	-7.70676	607.23	1.97593e-07	2.07209e-07	1.2998e-06	4.34711e-07	1.07567e-05	1.16958e-06	1.66826e-05	29971.4	0.559948	1.68516e-05	60924.3	17230.1
4997	82	10	8	1.62	0.7	5.4	4	38	0.1	loamy sand	0.17	13	1.204	1.18086	3.98107e-06	0.00423306	7.38789e-08	0.754212	0.931909	0.799689	-6.77176	-8.23451	1209.51	2.66652e-08	1.2908e-07	1.26723e-06	6.92751e-08	1.36359e-06	6.87751e-07	3.67087e-06	136208	0.485004	6.16343e-06	115600	47068.1
4998	82	10	8	1.62	0.7	5.4	4	38	0.1	loamy sand	0.17	13	1.204	1.18086	3.98107e-06	0.00423306	7.38789e-08	0.754212	0.931909	0.799689	-6.77176	-8.23451	1209.51	2.66652e-08	1.2908e-07	1.26723e-06	6.92751e-08	1.36359e-06	6.87751e-07	3.67087e-06	136208	0.485004	6.16343e-06	115600	47068.1
4999	82	10	8	1.62	0.7	5.4	4	38	0.1	loamy sand	0.17	13	1.204	1.18086	3.98107e-06	0.00423306	7.38789e-08	0.754212	0.931909	0.799689	-6.77176	-8.23451	1209.51	2.66652e-08	1.2908e-07	1.26723e-06	6.92751e-08	1.36359e-06	6.87751e-07	3.67087e-06	136208	0.485004	6.16343e-06	115600	47068.1
5000	82	10	8	1.62	0.7	5.4	4	38	0.1	loamy sand	0.17	13	1.204	1.18086	3.98107e-06	0.00423306	7.38789e-08	0.754212	0.931909	0.799689	-6.77176	-8.23451	1209.51	2.66652e-08	1.2908e-07	1.26723e-06	6.92751e-08	1.36359e-06	6.87751e-07	3.67087e-06	136208	0.485004	6.16343e-06	115600	47068.1
5001	83	11	6	1.67	0.5	6.6	5	94	0.1	loamy sand	0.17	13	0.86	0.870184	2.51189e-07	0.02764	2.14133e-05	0.530925	0.853608	0.817692	-6.96547	-9.28987	1889.41	3.60088e-09	1.18537e-07	1.26284e-06	1.99644e-08	9.61045e-08	6.23323e-07	1.89114e-06	264390	0.505532	5.04957e-07	117297	7916.56
5002	83	11	6	1.67	0.5	6.6	5	94	0.1	loamy sand	0.17	13	0.86	0.870184	2.51189e-07	0.02764	2.14133e-05	0.530925	0.853608	0.817692	-6.96547	-9.28987	1889.41	3.60088e-09	1.18537e-07	1.26284e-06	1.99644e-08	9.61045e-08	6.23323e-07	1.89114e-06	264390	0.505532	5.04957e-07	171423	11569.6
5003	47	34	19	1.43	0.97	6.4	12	79	0.1	loam	0.32	23	1.6684	1.11428	3.98107e-07	0.07639	9.23319e-05	0.401294	0.795913	1.02416	-6.72934	-9.17878	1940.8	4.50937e-09	1.18953e-07	1.26301e-06	2.19067e-08	1.4603e-07	6.27798e-07	5.33415e-06	93735.7	0.459651	8.91177e-07	175414	6735.36
5009	83	11	6	1.67	0.5	6.6	5	94	0.1	loamy sand	0.17	13	0.86	0.870184	2.51189e-07	0.02764	2.14133e-05	0.530925	0.853608	0.817692	-6.96547	-9.28987	1889.41	3.60088e-09	1.18537e-07	1.26284e-06	1.99644e-08	9.61045e-08	6.23323e-07	1.89114e-06	264390	0.505532	5.04957e-07	171423	11569.6
5010	83	11	6	1.67	0.5	6.6	5	94	0.1	loamy sand	0.17	13	0.86	0.870184	2.51189e-07	0.02764	2.14133e-05	0.530925	0.853608	0.817692	-6.96547	-9.28987	1889.41	3.60088e-09	1.18537e-07	1.26284e-06	1.99644e-08	9.61045e-08	6.23323e-07	1.89114e-06	264390	0.505532	5.04957e-07	171423	11569.6
5011	83	11	6	1.67	0.5	6.6	5	94	0.1	loamy sand	0.17	13	0.86	0.870184	2.51189e-07	0.02764	2.14133e-05	0.530925	0.853608	0.817692	-6.96547	-9.28987	1889.41	3.60088e-09	1.18537e-07	1.26284e-06	1.99644e-08	9.61045e-08	6.23323e-07	1.89114e-06	264390	0.505532	5.04957e-07	171423	11569.6
5012	47	34	19	1.43	0.97	6.4	12	79	0.1	loam	0.32	23	1.6684	1.11428	3.98107e-07	0.07639	9.23319e-05	0.401294	0.795913	1.02416	-6.72934	-9.17878	1940.8	4.50937e-09	1.18953e-07	1.26301e-06	2.19067e-08	1.4603e-07	6.27798e-07	5.33415e-06	93735.7	0.459651	8.91177e-07	175414	6735.36
5014	83	11	6	1.67	0.5	6.6	5	94	0.1	loamy sand	0.17	13	0.86	0.870184	2.51189e-07	0.02764	2.14133e-05	0.530925	0.853608	0.817692	-6.96547	-9.28987	1889.41	3.60088e-09	1.18537e-07	1.26284e-06	1.99644e-08	9.61045e-08	6.23323e-07	1.89114e-06	264390	0.505532	5.04957e-07	171423	11569.6
5015	83	11	6	1.67	0.5	6.6	5	94	0.1	loamy sand	0.17	13	0.86	0.870184	2.51189e-07	0.02764	2.14133e-05	0.530925	0.853608	0.817692	-6.96547	-9.28987	1889.41	3.60088e-09	1.18537e-07	1.26284e-06	1.99644e-08	9.61045e-08	6.23323e-07	1.89114e-06	264390	0.505532	5.04957e-07	171423	11569.6
5016	83	11	6	1.67	0.5	6.6	5	94	0.1	loamy sand	0.17	13	0.86	0.870184	2.51189e-07	0.02764	2.14133e-05	0.530925	0.853608	0.817692	-6.96547	-9.28987	1889.41	3.60088e-09	1.18537e-07	1.26284e-06	1.99644e-08	9.61045e-08	6.23323e-07	1.89114e-06	264390	0.505532	5.04957e-07	171423	11569.6
5017	47	34	19	1.43	0.97	6.4	12	79	0.1	loam	0.32	23	1.6684	1.11428	3.98107e-07	0.07639	9.23319e-05	0.401294	0.795913	1.02416	-6.72934	-9.17878	1940.8	4.50937e-09	1.18953e-07	1.26301e-06	2.19067e-08	1.4603e-07	6.27798e-07	5.33415e-06	93735.7	0.459651	8.91177e-07	175414	6735.36
5018	83	11	6	1.67	0.5	6.6	5	94	0.1	loamy sand	0.17	13	0.86	0.870184	2.51189e-07	0.02764	2.14133e-05	0.530925	0.853608	0.817692	-6.96547	-9.28987	1889.41	3.60088e-09	1.18537e-07	1.26284e-06	1.99644e-08	9.61045e-08	6.23323e-07	1.89114e-06	264390	0.505532	5.04957e-07	66442.6	4484.31
5019	47	34	19	1.43	0.97	6.4	12	79	0.1	loam	0.32	23	1.6684	1.11428	3.98107e-07	0.07639	9.23319e-05	0.401294	0.795913	1.02416	-6.72934	-9.17878	1940.8	4.50937e-09	1.18953e-07	1.26301e-06	2.19067e-08	1.4603e-07	6.27798e-07	5.33415e-06	93735.7	0.459651	8.91177e-07	175414	6735.36
5020	83	11	6	1.67	0.5	6.6	5	94	0.1	loamy sand	0.17	13	0.86	0.870184	2.51189e-07	0.02764	2.14133e-05	0.530925	0.853608	0.817692	-6.96547	-9.28987	1889.41	3.60088e-09	1.18537e-07	1.26284e-06	1.99644e-08	9.61045e-08	6.23323e-07	1.89114e-06	264390	0.505532	5.04957e-07	66442.6	4484.31
5021	83	11	6	1.67	0.5	6.6	5	94	0.1	loamy sand	0.17	13	0.86	0.870184	2.51189e-07	0.02764	2.14133e-05	0.530925	0.853608	0.817692	-6.96547	-9.28987	1889.41	3.60088e-09	1.18537e-07	1.26284e-06	1.99644e-08	9.61045e-08	6.23323e-07	1.89114e-06	264390	0.505532	5.04957e-07	171423	11569.6
5022	83	11	6	1.67	0.5	6.6	5	94	0.1	loamy sand	0.17	13	0.86	0.870184	2.51189e-07	0.02764	2.14133e-05	0.530925	0.853608	0.817692	-6.96547	-9.28987	1889.41	3.60088e-09	1.18537e-07	1.26284e-06	1.99644e-08	9.61045e-08	6.23323e-07	1.89114e-06	264390	0.505532	5.04957e-07	171423	11569.6
5029	46	43	11	1.51	4.38	5.9	24	57	0.1	loam	0.32	23	7.5336	1.67721	1.25893e-06	0.16146	2.26376e-12	0.325206	0.755161	1.0798	-6.43455	-9.21639	984.446	9.83242e-09	1.21386e-07	1.26403e-06	3.32872e-08	4.38553e-07	6.40308e-07	9.71909e-06	51445.1	0.522487	6.80871e-07	95784.2	1752.99
5030	46	43	11	1.51	4.38	5.9	24	57	0.1	loam	0.32	23	7.5336	1.67721	1.25893e-06	0.16146	2.26376e-12	0.325206	0.755161	1.0798	-6.43455	-9.21639	984.446	9.83242e-09	1.21386e-07	1.26403e-06	3.32872e-08	4.38553e-07	6.40308e-07	9.71909e-06	51445.1	0.522487	6.80871e-07	95784.2	1752.99
5031	46	43	11	1.51	4.38	5.9	24	57	0.1	loam	0.32	23	7.5336	1.67721	1.25893e-06	0.16146	2.26376e-12	0.325206	0.755161	1.0798	-6.43455	-9.21639	984.446	9.83242e-09	1.21386e-07	1.26403e-06	3.32872e-08	4.38553e-07	6.40308e-07	9.71909e-06	51445.1	0.522487	6.80871e-07	95784.2	1752.99
5040	42	38	20	1.41	1.06	5.5	11	65	0.1	loam	0.32	23	1.8232	1.29541	3.16228e-06	0.04722	0.000133677	0.460704	0.823864	1.02123	-6.59879	-8.31544	1436.91	2.16021e-08	1.26766e-07	1.26627e-06	5.84503e-08	1.08535e-06	6.77088e-07	1.01622e-05	49202	0.456568	6.64264e-06	134923	20133.2
5041	42	38	20	1.41	1.06	5.5	11	65	0.1	loam	0.32	23	1.8232	1.29541	3.16228e-06	0.04722	0.000133677	0.460704	0.823864	1.02123	-6.59879	-8.31544	1436.91	2.16021e-08	1.26766e-07	1.26627e-06	5.84503e-08	1.08535e-06	6.77088e-07	1.01622e-05	49202	0.456568	6.64264e-06	134923	20133.2
5042	42	38	20	1.41	1.06	5.5	11	65	0.1	loam	0.32	23	1.8232	1.29541	3.16228e-06	0.04722	0.000133677	0.460704	0.823864	1.02123	-6.59879	-8.31544	1436.91	2.16021e-08	1.26766e-07	1.26627e-06	5.84503e-08	1.08535e-06	6.77088e-07	1.01622e-05	49202	0.456568	6.64264e-06	134923	20133.2
5043	42	38	20	1.41	1.06	5.5	11	65	0.1	loam	0.32	23	1.8232	1.29541	3.16228e-06	0.04722	0.000133677	0.460704	0.823864	1.02123	-6.59879	-8.31544	1436.91	2.16021e-08	1.26766e-07	1.26627e-06	5.84503e-08	1.08535e-06	6.77088e-07	1.01622e-05	49202	0.456568	6.64264e-06	134923	20133.2
5846	46	30	24	1.39	1.73	5	9	27	0.1	loam	0.32	23	2.9756	1.53571	1e-05	0.02371	8.80148e-08	0.551181	0.861635	1.01259	-6.47371	-8.01179	1077.33	6.38843e-08	1.46092e-07	1.27433e-06	1.48848e-07	3.40893e-06	7.92649e-07	1.51438e-05	33016.8	0.447568	1.38309e-05	69777.6	14261.3
5847	34	43	23	1.38	0.83	4.9	7	30	0.1	loam	0.32	23	1.4276	1.31986	1.25893e-05	0.00981081	3.54799e-06	0.662912	0.902327	1.00841	-6.55742	-7.63129	1306.36	7.98957e-08	1.53411e-07	1.27738e-06	1.8308e-07	4.28882e-06	8.37869e-07	1.43084e-05	34944.5	0.443285	3.378e-05	83590.4	43740
5848	34	43	23	1.38	0.83	4.9	7	30	0.1	loam	0.32	23	1.4276	1.31986	1.25893e-05	0.00981081	3.54799e-06	0.662912	0.902327	1.00841	-6.55742	-7.63129	1306.36	7.98957e-08	1.53411e-07	1.27738e-06	1.8308e-07	4.28882e-06	8.37869e-07	1.43084e-05	34944.5	0.443285	3.378e-05	83590.4	43740
5849	34	43	23	1.38	0.83	4.9	7	30	0.1	loam	0.32	23	1.4276	1.31986	1.25893e-05	0.00981081	3.54799e-06	0.662912	0.902327	1.00841	-6.55742	-7.63129	1306.36	7.98957e-08	1.53411e-07	1.27738e-06	1.8308e-07	4.28882e-06	8.37869e-07	1.43084e-05	34944.5	0.443285	3.378e-05	83590.4	43740
5850	34	43	23	1.38	0.83	4.9	7	30	0.1	loam	0.32	23	1.4276	1.31986	1.25893e-05	0.00981081	3.54799e-06	0.662912	0.902327	1.00841	-6.55742	-7.63129	1306.36	7.98957e-08	1.53411e-07	1.27738e-06	1.8308e-07	4.28882e-06	8.37869e-07	1.43084e-05	34944.5	0.443285	3.378e-05	83590.4	43740
5851	34	43	23	1.38	0.83	4.9	7	30	0.1	loam	0.32	23	1.4276	1.31986	1.25893e-05	0.00981081	3.54799e-06	0.662912	0.902327	1.00841	-6.55742	-7.63129	1306.36	7.98957e-08	1.53411e-07	1.27738e-06	1.8308e-07	4.28882e-06	8.37869e-07	1.43084e-05	34944.5	0.443285	3.378e-05	83590.4	43740
5852	46	30	24	1.39	1.73	5	9	27	0.1	loam	0.32	23	2.9756	1.53571	1e-05	0.02371	8.80148e-08	0.551181	0.861635	1.01259	-6.47371	-8.01179	1077.33	6.38843e-08	1.46092e-07	1.27433e-06	1.48848e-07	3.40893e-06	7.92649e-07	1.51438e-05	33016.8	0.447568	1.38309e-05	69777.6	14261.3
5853	46	30	24	1.39	1.73	5	9	27	0.1	loam	0.32	23	2.9756	1.53571	1e-05	0.02371	8.80148e-08	0.551181	0.861635	1.01259	-6.47371	-8.01179	1077.33	6.38843e-08	1.46092e-07	1.27433e-06	1.48848e-07	3.40893e-06	7.92649e-07	1.51438e-05	33016.8	0.447568	1.38309e-05	69777.6	14261.3
5854	46	30	24	1.39	1.73	5	9	27	0.1	loam	0.32	23	2.9756	1.53571	1e-05	0.02371	8.80148e-08	0.551181	0.861635	1.01259	-6.47371	-8.01179	1077.33	6.38843e-08	1.46092e-07	1.27433e-06	1.48848e-07	3.40893e-06	7.92649e-07	1.51438e-05	33016.8	0.447568	1.38309e-05	69777.6	14261.3
5855	46	30	24	1.39	1.73	5	9	27	0.1	loam	0.32	23	2.9756	1.53571	1e-05	0.02371	8.80148e-08	0.551181	0.861635	1.01259	-6.47371	-8.01179	1077.33	6.38843e-08	1.46092e-07	1.27433e-06	1.48848e-07	3.40893e-06	7.92649e-07	1.51438e-05	33016.8	0.447568	1.38309e-05	69777.6	14261.3
5856	46	30	24	1.39	1.73	5	9	27	0.1	loam	0.32	23	2.9756	1.53571	1e-05	0.02371	8.80148e-08	0.551181	0.861635	1.01259	-6.47371	-8.01179	1077.33	6.38843e-08	1.46092e-07	1.27433e-06	1.48848e-07	3.40893e-06	7.92649e-07	1.51438e-05	33016.8	0.447568	1.38309e-05	69777.6	14261.3
5857	81	9	10	1.59	0.55	5.5	4	68	0.1	loamy sand	0.17	13	0.946	1.0874	3.16228e-06	0.00505528	3.57032e-06	0.736475	0.926381	0.780708	-6.82765	-8.25667	1375.64	2.16021e-08	1.26766e-07	1.26627e-06	5.84503e-08	1.08535e-06	6.73576e-07	3.37422e-06	148182	0.464264	6.23392e-06	87703.4	37613.1
5858	81	9	10	1.59	0.55	5.5	4	68	0.1	loamy sand	0.17	13	0.946	1.0874	3.16228e-06	0.00505528	3.57032e-06	0.736475	0.926381	0.780708	-6.82765	-8.25667	1375.64	2.16021e-08	1.26766e-07	1.26627e-06	5.84503e-08	1.08535e-06	6.73576e-07	3.37422e-06	148182	0.464264	6.23392e-06	87703.4	37613.1
5859	81	9	10	1.59	0.55	5.5	4	68	0.1	loamy sand	0.17	13	0.946	1.0874	3.16228e-06	0.00505528	3.57032e-06	0.736475	0.926381	0.780708	-6.82765	-8.25667	1375.64	2.16021e-08	1.26766e-07	1.26627e-06	5.84503e-08	1.08535e-06	6.73576e-07	3.37422e-06	148182	0.464264	6.23392e-06	87703.4	37613.1
5860	81	9	10	1.59	0.55	5.5	4	68	0.1	loamy sand	0.17	13	0.946	1.0874	3.16228e-06	0.00505528	3.57032e-06	0.736475	0.926381	0.780708	-6.82765	-8.25667	1375.64	2.16021e-08	1.26766e-07	1.26627e-06	5.84503e-08	1.08535e-06	6.73576e-07	3.37422e-06	148182	0.464264	6.23392e-06	87703.4	37613.1
5861	81	9	10	1.59	0.55	5.5	4	68	0.1	loamy sand	0.17	13	0.946	1.0874	3.16228e-06	0.00505528	3.57032e-06	0.736475	0.926381	0.780708	-6.82765	-8.25667	1375.64	2.16021e-08	1.26766e-07	1.26627e-06	5.84503e-08	1.08535e-06	6.73576e-07	3.37422e-06	148182	0.464264	6.23392e-06	87703.4	37613.1
5862	81	9	10	1.59	0.55	5.5	4	68	0.1	loamy sand	0.17	13	0.946	1.0874	3.16228e-06	0.00505528	3.57032e-06	0.736475	0.926381	0.780708	-6.82765	-8.25667	1375.64	2.16021e-08	1.26766e-07	1.26627e-06	5.84503e-08	1.08535e-06	6.73576e-07	3.37422e-06	148182	0.464264	6.23392e-06	87703.4	37613.1
5863	81	9	10	1.59	0.55	5.5	4	68	0.1	loamy sand	0.17	13	0.946	1.0874	3.16228e-06	0.00505528	3.57032e-06	0.736475	0.926381	0.780708	-6.82765	-8.25667	1375.64	2.16021e-08	1.26766e-07	1.26627e-06	5.84503e-08	1.08535e-06	6.73576e-07	3.37422e-06	148182	0.464264	6.23392e-06	87703.4	37613.1
5865	42	36	22	1.4	1	6.6	16	93	0.1	loam	0.32	23	1.72	1.08994	2.51189e-07	0.13481	0.000188303	0.34105	0.764195	1.01357	-6.75863	-9.39913	2076.18	3.60088e-09	1.18537e-07	1.26284e-06	1.99644e-08	9.61045e-08	6.27828e-07	5.54833e-06	90117.2	0.448586	5.61577e-07	127675	2898.47
5866	42	36	22	1.4	1	6.6	16	93	0.1	loam	0.32	23	1.72	1.08994	2.51189e-07	0.13481	0.000188303	0.34105	0.764195	1.01357	-6.75863	-9.39913	2076.18	3.60088e-09	1.18537e-07	1.26284e-06	1.99644e-08	9.61045e-08	6.27828e-07	5.54833e-06	90117.2	0.448586	5.61577e-07	127675	2898.47
5867	42	36	22	1.4	1	6.6	16	93	0.1	loam	0.32	23	1.72	1.08994	2.51189e-07	0.13481	0.000188303	0.34105	0.764195	1.01357	-6.75863	-9.39913	2076.18	3.60088e-09	1.18537e-07	1.26284e-06	1.99644e-08	9.61045e-08	6.27828e-07	5.54833e-06	90117.2	0.448586	5.61577e-07	127675	2898.47
5868	52	25	23	1.41	0.95	4.7	6	39	0.1	sandy clay loam	0.16	13	1.634	1.39667	1.99526e-05	0.00613307	2.9035e-06	0.716192	0.919936	0.724312	-6.68362	-7.7136	987.363	1.25428e-07	1.74223e-07	1.28605e-06	2.80426e-07	6.791e-06	9.66178e-07	8.6651e-06	57702.8	0.407726	2.63072e-05	64259.1	39771.7
5869	41	36	23	1.39	2.72	5.2	21	24	0.1	loam	0.32	23	4.6784	1.64517	6.30957e-06	0.10286	1.93617e-06	0.368018	0.778874	1.02027	-6.43765	-8.38047	991.499	4.10639e-08	1.35661e-07	1.26998e-06	1.00059e-07	2.15485e-06	7.28382e-07	1.77825e-05	28117.5	0.455554	5.81413e-06	64513.9	4804.57
5870	57	15	28	1.39	0.98	4.7	5	44	0.1	sandy clay loam	0.16	13	1.6856	1.40653	1.99526e-05	0.0033835	8.95818e-08	0.775353	0.938372	0.710014	-6.68819	-7.7372	997.814	1.25428e-07	1.74223e-07	1.28605e-06	2.80426e-07	6.791e-06	9.66103e-07	8.00383e-06	62470.1	0.394522	2.61203e-05	64902.9	41781.6
5871	22	19	59	1.21	1.42	5.4	10	61	0.1	clay(heavy)	0.2	24	2.4424	1.40511	3.98107e-06	0.03369	5.30651e-09	0.504765	0.842893	0.965107	-6.58136	-8.37392	1440.4	2.66652e-08	1.2908e-07	1.26723e-06	6.92751e-08	1.36359e-06	6.87749e-07	6.45289e-06	77484.6	0.3845	4.81176e-06	91521.5	13120.2
5872	79	7	14	1.54	0.74	5.4	3	36	0.1	sandy loam	0.2	13	1.2728	1.19847	3.98107e-06	0.00095248	1.32617e-11	0.869504	0.965646	0.758684	-6.7892	-8.2892	1259.08	2.66652e-08	1.2908e-07	1.26723e-06	6.92751e-08	1.36359e-06	6.87749e-07	3.74603e-06	133474	0.441307	7.39111e-06	80766.3	35162.4
5873	79	7	14	1.54	0.74	5.4	3	36	0.1	sandy loam	0.2	13	1.2728	1.19847	3.98107e-06	0.00095248	1.32617e-11	0.869504	0.965646	0.758684	-6.7892	-8.2892	1259.08	2.66652e-08	1.2908e-07	1.26723e-06	6.92751e-08	1.36359e-06	6.87749e-07	3.74603e-06	133474	0.441307	7.39111e-06	80766.3	35162.4
5874	62	12	26	1.41	0.68	5.4	5	75	0.1	sandy clay loam	0.16	13	1.1696	1.17167	3.98107e-06	0.00848936	3.83237e-07	0.679888	0.908049	0.711867	-6.82818	-8.29444	1377.33	2.66652e-08	1.2908e-07	1.26723e-06	6.92751e-08	1.36359e-06	6.87759e-07	3.83263e-06	130459	0.396209	7.10689e-06	87803.7	32254.4
5875	62	12	26	1.41	0.68	5.4	5	75	0.1	sandy clay loam	0.16	13	1.1696	1.17167	3.98107e-06	0.00848936	3.83237e-07	0.679888	0.908049	0.711867	-6.82818	-8.29444	1377.33	2.66652e-08	1.2908e-07	1.26723e-06	6.92751e-08	1.36359e-06	6.87759e-07	3.83263e-06	130459	0.396209	7.10689e-06	87803.7	32254.4
5876	64	12	24	1.43	0.73	4.6	5	44	0.1	sandy clay loam	0.16	13	1.2556	1.33016	2.51189e-05	0.00295642	8.78748e-06	0.787414	0.942	0.71852	-6.70761	-7.51648	1043.43	1.57375e-07	1.88826e-07	1.29214e-06	3.48727e-07	8.5466e-06	1.05638e-06	9.07971e-06	55067.8	0.402325	4.1388e-05	67704.6	62082.2
5877	64	12	24	1.43	0.73	4.6	5	44	0.1	sandy clay loam	0.16	13	1.2556	1.33016	2.51189e-05	0.00295642	8.78748e-06	0.787414	0.942	0.71852	-6.70761	-7.51648	1043.43	1.57375e-07	1.88826e-07	1.29214e-06	3.48727e-07	8.5466e-06	1.05638e-06	9.07971e-06	55067.8	0.402325	4.1388e-05	67704.6	62082.2
5879	64	12	24	1.43	0.73	4.6	5	44	0.1	sandy clay loam	0.16	13	1.2556	1.33016	2.51189e-05	0.00295642	8.78748e-06	0.787414	0.942	0.71852	-6.70761	-7.51648	1043.43	1.57375e-07	1.88826e-07	1.29214e-06	3.48727e-07	8.5466e-06	1.05638e-06	9.07971e-06	55067.8	0.402325	4.1388e-05	67704.6	62082.2
5881	17	31	52	1.23	4.2	5	23	22	0.1	clay (light)	0.2	24	7.224	1.81691	1e-05	0.10448	2.1852e-07	0.366367	0.777999	0.985319	-6.37578	-8.37671	897.229	6.38843e-08	1.46092e-07	1.27433e-06	1.48848e-07	3.40893e-06	7.92653e-07	1.42394e-05	35113.7	0.402817	4.48941e-06	58676.8	3725.97
5882	17	31	52	1.23	4.2	5	23	22	0.1	clay (light)	0.2	24	7.224	1.81691	1e-05	0.10448	2.1852e-07	0.366367	0.777999	0.985319	-6.37578	-8.37671	897.229	6.38843e-08	1.46092e-07	1.27433e-06	1.48848e-07	3.40893e-06	7.92653e-07	1.42394e-05	35113.7	0.402817	4.48941e-06	58676.8	3725.97
5883	18	32	50	1.23	1.97	6.4	32	79	0.1	clay (light)	0.2	24	3.3884	1.3389	3.98107e-07	0.23498	0.000415371	0.299041	0.739491	0.980669	-6.66414	-9.48785	1742.86	4.50937e-09	1.18953e-07	1.26301e-06	2.19067e-08	1.4603e-07	6.36517e-07	4.4841e-06	111505	0.398527	3.51309e-07	109015	1701.89
5884	18	32	50	1.23	1.97	6.4	32	79	0.1	clay (light)	0.2	24	3.3884	1.3389	3.98107e-07	0.23498	0.000415371	0.299041	0.739491	0.980669	-6.66414	-9.48785	1742.86	4.50937e-09	1.18953e-07	1.26301e-06	2.19067e-08	1.4603e-07	6.36517e-07	4.4841e-06	111505	0.398527	3.51309e-07	109015	1701.89
5885	18	32	50	1.23	1.97	6.4	32	79	0.1	clay (light)	0.2	24	3.3884	1.3389	3.98107e-07	0.23498	0.000415371	0.299041	0.739491	0.980669	-6.66414	-9.48785	1742.86	4.50937e-09	1.18953e-07	1.26301e-06	2.19067e-08	1.4603e-07	6.36517e-07	4.4841e-06	111505	0.398527	3.51309e-07	109015	1701.89
5886	18	32	50	1.23	1.97	6.4	32	79	0.1	clay (light)	0.2	24	3.3884	1.3389	3.98107e-07	0.23498	0.000415371	0.299041	0.739491	0.980669	-6.66414	-9.48785	1742.86	4.50937e-09	1.18953e-07	1.26301e-06	2.19067e-08	1.4603e-07	6.36517e-07	4.4841e-06	111505	0.398527	3.51309e-07	109015	1701.89
5887	18	32	50	1.23	1.97	6.4	32	79	0.1	clay (light)	0.2	24	3.3884	1.3389	3.98107e-07	0.23498	0.000415371	0.299041	0.739491	0.980669	-6.66414	-9.48785	1742.86	4.50937e-09	1.18953e-07	1.26301e-06	2.19067e-08	1.4603e-07	6.36517e-07	4.4841e-06	111505	0.398527	3.51309e-07	109015	1701.89
5888	18	32	50	1.23	1.97	6.4	32	79	0.1	clay (light)	0.2	24	3.3884	1.3389	3.98107e-07	0.23498	0.000415371	0.299041	0.739491	0.980669	-6.66414	-9.48785	1742.86	4.50937e-09	1.18953e-07	1.26301e-06	2.19067e-08	1.4603e-07	6.36517e-07	4.4841e-06	111505	0.398527	3.51309e-07	109015	1701.89
5889	35	41	24	1.37	1.68	6.2	19	87	0.1	loam	0.32	23	2.8896	1.32241	6.30957e-07	0.13259	0.000298876	0.3426	0.765062	1.01229	-6.63882	-9.20069	1575.67	5.94924e-09	1.19611e-07	1.26329e-06	2.49851e-08	2.25157e-07	6.37431e-07	7.21394e-06	69310.2	0.447266	9.08939e-07	99412.7	2801.17
5890	35	41	24	1.37	1.68	6.2	19	87	0.1	loam	0.32	23	2.8896	1.32241	6.30957e-07	0.13259	0.000298876	0.3426	0.765062	1.01229	-6.63882	-9.20069	1575.67	5.94924e-09	1.19611e-07	1.26329e-06	2.49851e-08	2.25157e-07	6.37431e-07	7.21394e-06	69310.2	0.447266	9.08939e-07	99412.7	2801.17
[truncated: 6,446 more rows]

## Sheet: Table S7 - CF_WHAM
MU_GLOBAL	SAND	SILT	CLAY	REF_BULK_DENSITY	OC	PH_H2O	CEC_SOIL	BS	ECE	TEXTURE_CLASS	THETA_W	Free ion activity (M): H	Ionic strength (M)	Free ion activity (M): Mg	True solution concentration (M): Cu[2+]	Aqueous concentration (M): Cu[2+]	Total (M): Cu	Total true solution concentration (M): Cu	Total aqueous concentration (M): Cu	Free ion activity (M): Cu	Activity (M): Cu[2+]	Particle-bound concentration (M): Cu	Log10 partition coefficient (dm3/kg): Cu	Kd	F_DI	F_MONO	BRE_EPT	TSY_EPT	FJP_EPT	ECP_EPT	GIR_EPT	PNR_EPT	GMEAN_EC50_KG	EF	BF_WHAM	FF	CF
[truncated: 7,907 more rows]

[truncated: 2 more sheets: Table S8, Shapefiles]
